# Supplementary material for: Unique viruses that infect Archaea related to eukaryotes
Source: Research Square preprint supplement (doi:10.21203/rs.3.rs-960995/v1), 2021-10-12
Supplement: Supplementary file 2 [file 39a1dd0479f4a6d1f8ba5cb1.xlsx]

## Sheet: Asgard Genomes InterProScan
Genome	Scaffold			Analysis	Signature Accession	Signature Description	Start location	Stop location	E-value	Match status	Date	InterPro annotation	InterPro description
Meg22_1416_Bin_151_Lokiarchaeota	Meg22_1416_Bin_151_scaffold_147_3_22	54120f67e8775e0f2accd17de72c9b67	356	PANTHER	PTHR17490:SF16	SI:CH211-153B23.4	5	353	1e-109	T	23-07-2021	-	-
Meg22_1416_Bin_151_Lokiarchaeota	Meg22_1416_Bin_151_scaffold_147_3_22	54120f67e8775e0f2accd17de72c9b67	356	Gene3D	G3DSA:3.40.50.11030	-	223	356	1.8e-40	T	23-07-2021	IPR038385	Threonylcarbamoyl-AMP synthase, C-terminal domain superfamily
Meg22_1416_Bin_151_Lokiarchaeota	Meg22_1416_Bin_151_scaffold_147_3_22	54120f67e8775e0f2accd17de72c9b67	356	PANTHER	PTHR17490	SUA5	5	353	1e-109	T	23-07-2021	-	-
Meg22_1416_Bin_151_Lokiarchaeota	Meg22_1416_Bin_151_scaffold_147_3_22	54120f67e8775e0f2accd17de72c9b67	356	Pfam	PF03481	Putative GTP-binding controlling metal-binding	204	349	8.5e-34	T	23-07-2021	IPR005145	Putative GTP-binding controlling metal-binding domain
Meg22_1416_Bin_151_Lokiarchaeota	Meg22_1416_Bin_151_scaffold_147_3_22	54120f67e8775e0f2accd17de72c9b67	356	PIRSF	PIRSF004930	Tln_factor_SUA5	4	355	1.7e-131	T	23-07-2021	IPR010923	tRNA threonylcarbamoyladenosine biosynthesis protein SUA5
Meg22_1416_Bin_151_Lokiarchaeota	Meg22_1416_Bin_151_scaffold_147_3_22	54120f67e8775e0f2accd17de72c9b67	356	Gene3D	G3DSA:3.90.870.10	DHBP synthase	5	218	3.8e-86	T	23-07-2021	-	-
Meg22_1416_Bin_151_Lokiarchaeota	Meg22_1416_Bin_151_scaffold_147_3_22	54120f67e8775e0f2accd17de72c9b67	356	SUPERFAMILY	SSF55821	YrdC/RibB	8	215	2.29e-67	T	23-07-2021	IPR017945	DHBP synthase RibB-like alpha/beta domain superfamily
Meg22_1416_Bin_151_Lokiarchaeota	Meg22_1416_Bin_151_scaffold_147_3_22	54120f67e8775e0f2accd17de72c9b67	356	Pfam	PF01300	Telomere recombination	26	202	2.7e-58	T	23-07-2021	IPR006070	YrdC-like domain
Meg22_1416_Bin_151_Lokiarchaeota	Meg22_1416_Bin_151_scaffold_147_3_22	54120f67e8775e0f2accd17de72c9b67	356	ProSiteProfiles	PS51163	YrdC-like domain profile.	18	204	30.219	T	23-07-2021	IPR006070	YrdC-like domain
Meg22_1416_Bin_151_Lokiarchaeota	Meg22_1416_Bin_151_scaffold_147_3_22	54120f67e8775e0f2accd17de72c9b67	356	TIGRFAM	TIGR00057	TIGR00057: tRNA threonylcarbamoyl adenosine modification protein, Sua5/YciO/YrdC/YwlC family	12	213	2.5e-67	T	23-07-2021	IPR006070	YrdC-like domain
Meg22_1012_Bin_233_Lokiarchaeota	Meg22_1012_Bin_233_scaffold_45_8_77	54120f67e8775e0f2accd17de72c9b67	356	PANTHER	PTHR17490:SF16	SI:CH211-153B23.4	5	353	1e-109	T	23-07-2021	-	-
Meg22_1012_Bin_233_Lokiarchaeota	Meg22_1012_Bin_233_scaffold_45_8_77	54120f67e8775e0f2accd17de72c9b67	356	Gene3D	G3DSA:3.40.50.11030	-	223	356	1.8e-40	T	23-07-2021	IPR038385	Threonylcarbamoyl-AMP synthase, C-terminal domain superfamily
Meg22_1012_Bin_233_Lokiarchaeota	Meg22_1012_Bin_233_scaffold_45_8_77	54120f67e8775e0f2accd17de72c9b67	356	PANTHER	PTHR17490	SUA5	5	353	1e-109	T	23-07-2021	-	-
Meg22_1012_Bin_233_Lokiarchaeota	Meg22_1012_Bin_233_scaffold_45_8_77	54120f67e8775e0f2accd17de72c9b67	356	Pfam	PF03481	Putative GTP-binding controlling metal-binding	204	349	8.5e-34	T	23-07-2021	IPR005145	Putative GTP-binding controlling metal-binding domain
Meg22_1012_Bin_233_Lokiarchaeota	Meg22_1012_Bin_233_scaffold_45_8_77	54120f67e8775e0f2accd17de72c9b67	356	PIRSF	PIRSF004930	Tln_factor_SUA5	4	355	1.7e-131	T	23-07-2021	IPR010923	tRNA threonylcarbamoyladenosine biosynthesis protein SUA5
Meg22_1012_Bin_233_Lokiarchaeota	Meg22_1012_Bin_233_scaffold_45_8_77	54120f67e8775e0f2accd17de72c9b67	356	Gene3D	G3DSA:3.90.870.10	DHBP synthase	5	218	3.8e-86	T	23-07-2021	-	-
Meg22_1012_Bin_233_Lokiarchaeota	Meg22_1012_Bin_233_scaffold_45_8_77	54120f67e8775e0f2accd17de72c9b67	356	SUPERFAMILY	SSF55821	YrdC/RibB	8	215	2.29e-67	T	23-07-2021	IPR017945	DHBP synthase RibB-like alpha/beta domain superfamily
Meg22_1012_Bin_233_Lokiarchaeota	Meg22_1012_Bin_233_scaffold_45_8_77	54120f67e8775e0f2accd17de72c9b67	356	Pfam	PF01300	Telomere recombination	26	202	2.7e-58	T	23-07-2021	IPR006070	YrdC-like domain
Meg22_1012_Bin_233_Lokiarchaeota	Meg22_1012_Bin_233_scaffold_45_8_77	54120f67e8775e0f2accd17de72c9b67	356	ProSiteProfiles	PS51163	YrdC-like domain profile.	18	204	30.219	T	23-07-2021	IPR006070	YrdC-like domain
Meg22_1012_Bin_233_Lokiarchaeota	Meg22_1012_Bin_233_scaffold_45_8_77	54120f67e8775e0f2accd17de72c9b67	356	TIGRFAM	TIGR00057	TIGR00057: tRNA threonylcarbamoyl adenosine modification protein, Sua5/YciO/YrdC/YwlC family	12	213	2.5e-67	T	23-07-2021	IPR006070	YrdC-like domain
Meg22_1214_Bin_191_Lokiarchaeota	Meg22_1214_Bin_191_scaffold_131_3_78	54120f67e8775e0f2accd17de72c9b67	356	PANTHER	PTHR17490:SF16	SI:CH211-153B23.4	5	353	1e-109	T	23-07-2021	-	-
Meg22_1214_Bin_191_Lokiarchaeota	Meg22_1214_Bin_191_scaffold_131_3_78	54120f67e8775e0f2accd17de72c9b67	356	Gene3D	G3DSA:3.40.50.11030	-	223	356	1.8e-40	T	23-07-2021	IPR038385	Threonylcarbamoyl-AMP synthase, C-terminal domain superfamily
Meg22_1214_Bin_191_Lokiarchaeota	Meg22_1214_Bin_191_scaffold_131_3_78	54120f67e8775e0f2accd17de72c9b67	356	PANTHER	PTHR17490	SUA5	5	353	1e-109	T	23-07-2021	-	-
Meg22_1214_Bin_191_Lokiarchaeota	Meg22_1214_Bin_191_scaffold_131_3_78	54120f67e8775e0f2accd17de72c9b67	356	Pfam	PF03481	Putative GTP-binding controlling metal-binding	204	349	8.5e-34	T	23-07-2021	IPR005145	Putative GTP-binding controlling metal-binding domain
Meg22_1214_Bin_191_Lokiarchaeota	Meg22_1214_Bin_191_scaffold_131_3_78	54120f67e8775e0f2accd17de72c9b67	356	PIRSF	PIRSF004930	Tln_factor_SUA5	4	355	1.7e-131	T	23-07-2021	IPR010923	tRNA threonylcarbamoyladenosine biosynthesis protein SUA5
Meg22_1214_Bin_191_Lokiarchaeota	Meg22_1214_Bin_191_scaffold_131_3_78	54120f67e8775e0f2accd17de72c9b67	356	Gene3D	G3DSA:3.90.870.10	DHBP synthase	5	218	3.8e-86	T	23-07-2021	-	-
Meg22_1214_Bin_191_Lokiarchaeota	Meg22_1214_Bin_191_scaffold_131_3_78	54120f67e8775e0f2accd17de72c9b67	356	SUPERFAMILY	SSF55821	YrdC/RibB	8	215	2.29e-67	T	23-07-2021	IPR017945	DHBP synthase RibB-like alpha/beta domain superfamily
Meg22_1214_Bin_191_Lokiarchaeota	Meg22_1214_Bin_191_scaffold_131_3_78	54120f67e8775e0f2accd17de72c9b67	356	Pfam	PF01300	Telomere recombination	26	202	2.7e-58	T	23-07-2021	IPR006070	YrdC-like domain
Meg22_1214_Bin_191_Lokiarchaeota	Meg22_1214_Bin_191_scaffold_131_3_78	54120f67e8775e0f2accd17de72c9b67	356	ProSiteProfiles	PS51163	YrdC-like domain profile.	18	204	30.219	T	23-07-2021	IPR006070	YrdC-like domain
Meg22_1214_Bin_191_Lokiarchaeota	Meg22_1214_Bin_191_scaffold_131_3_78	54120f67e8775e0f2accd17de72c9b67	356	TIGRFAM	TIGR00057	TIGR00057: tRNA threonylcarbamoyl adenosine modification protein, Sua5/YciO/YrdC/YwlC family	12	213	2.5e-67	T	23-07-2021	IPR006070	YrdC-like domain
Meg19_1012_Bin_504_Helarchaeota	Meg19_1012_Bin_504_scaffold_4800_47_19	556f511ce9e9f1736a4b5f491f6baa31	262	PANTHER	PTHR37418	3-KETO-5-AMINOHEXANOATE CLEAVAGE ENZYME-RELATED	2	262	2e-29	T	23-07-2021	IPR008567	3-keto-5-aminohexanoate cleavage enzyme
Meg19_1012_Bin_504_Helarchaeota	Meg19_1012_Bin_504_scaffold_4800_47_19	556f511ce9e9f1736a4b5f491f6baa31	262	Gene3D	G3DSA:3.20.20.70	Aldolase class I	2	262	1e-61	T	23-07-2021	IPR013785	Aldolase-type TIM barrel
Meg19_1012_Bin_504_Helarchaeota	Meg19_1012_Bin_504_scaffold_4800_47_19	556f511ce9e9f1736a4b5f491f6baa31	262	PANTHER	PTHR37418:SF2	3-KETO-5-AMINOHEXANOATE CLEAVAGE ENZYME	2	262	2e-29	T	23-07-2021	-	-
Meg19_1012_Bin_504_Helarchaeota	Meg19_1012_Bin_504_scaffold_4800_47_19	556f511ce9e9f1736a4b5f491f6baa31	262	Pfam	PF05853	beta-keto acid cleavage enzyme	3	261	5.9e-54	T	23-07-2021	IPR008567	3-keto-5-aminohexanoate cleavage enzyme
Meg22_1012_Bin_233_Lokiarchaeota	Meg22_1012_Bin_233_scaffold_1_1_37	8c7940c6cd97b1d8995870abfaa9a54e	237	Pfam	PF00132	Bacterial transferase hexapeptide (six repeats)	178	207	6e-05	T	23-07-2021	IPR001451	Hexapeptide repeat
Meg22_1012_Bin_233_Lokiarchaeota	Meg22_1012_Bin_233_scaffold_1_1_37	8c7940c6cd97b1d8995870abfaa9a54e	237	Pfam	PF00132	Bacterial transferase hexapeptide (six repeats)	139	162	0.00082	T	23-07-2021	IPR001451	Hexapeptide repeat
Meg22_1012_Bin_233_Lokiarchaeota	Meg22_1012_Bin_233_scaffold_1_1_37	8c7940c6cd97b1d8995870abfaa9a54e	237	Gene3D	G3DSA:2.160.10.10	Hexapeptide repeat proteins	99	235	3.6e-15	T	23-07-2021	-	-
Meg22_1012_Bin_233_Lokiarchaeota	Meg22_1012_Bin_233_scaffold_1_1_37	8c7940c6cd97b1d8995870abfaa9a54e	237	SUPERFAMILY	SSF51161	Trimeric LpxA-like enzymes	107	229	8.32e-19	T	23-07-2021	IPR011004	Trimeric LpxA-like superfamily
Meg22_1214_Bin_191_Lokiarchaeota	Meg22_1214_Bin_191_scaffold_2956_33_12	8c7940c6cd97b1d8995870abfaa9a54e	237	Pfam	PF00132	Bacterial transferase hexapeptide (six repeats)	178	207	6e-05	T	23-07-2021	IPR001451	Hexapeptide repeat
Meg22_1214_Bin_191_Lokiarchaeota	Meg22_1214_Bin_191_scaffold_2956_33_12	8c7940c6cd97b1d8995870abfaa9a54e	237	Pfam	PF00132	Bacterial transferase hexapeptide (six repeats)	139	162	0.00082	T	23-07-2021	IPR001451	Hexapeptide repeat
Meg22_1214_Bin_191_Lokiarchaeota	Meg22_1214_Bin_191_scaffold_2956_33_12	8c7940c6cd97b1d8995870abfaa9a54e	237	Gene3D	G3DSA:2.160.10.10	Hexapeptide repeat proteins	99	235	3.6e-15	T	23-07-2021	-	-
Meg22_1214_Bin_191_Lokiarchaeota	Meg22_1214_Bin_191_scaffold_2956_33_12	8c7940c6cd97b1d8995870abfaa9a54e	237	SUPERFAMILY	SSF51161	Trimeric LpxA-like enzymes	107	229	8.32e-19	T	23-07-2021	IPR011004	Trimeric LpxA-like superfamily
Meg22_1012_Bin_233_Lokiarchaeota	Meg22_1012_Bin_233_scaffold_1145_27_10	3fcba7763fb83f093fafefd84ba41bf7	314	PANTHER	PTHR11618:SF13	TRANSCRIPTION INITIATION FACTOR IIB	23	308	6e-39	T	23-07-2021	-	-
Meg22_1012_Bin_233_Lokiarchaeota	Meg22_1012_Bin_233_scaffold_1145_27_10	3fcba7763fb83f093fafefd84ba41bf7	314	CDD	cd00043	CYCLIN	219	303	6.47011e-08	T	23-07-2021	IPR013763	Cyclin-like
Meg22_1012_Bin_233_Lokiarchaeota	Meg22_1012_Bin_233_scaffold_1145_27_10	3fcba7763fb83f093fafefd84ba41bf7	314	PANTHER	PTHR11618	TRANSCRIPTION INITIATION FACTOR IIB-RELATED	23	308	6e-39	T	23-07-2021	IPR000812	Transcription factor TFIIB
Meg22_1012_Bin_233_Lokiarchaeota	Meg22_1012_Bin_233_scaffold_1145_27_10	3fcba7763fb83f093fafefd84ba41bf7	314	ProSitePatterns	PS00782	Transcription factor TFIIB repeat signature.	258	273	-	T	23-07-2021	IPR023486	Transcription factor TFIIB, conserved site
Meg22_1012_Bin_233_Lokiarchaeota	Meg22_1012_Bin_233_scaffold_1145_27_10	3fcba7763fb83f093fafefd84ba41bf7	314	SMART	SM00385	cyclin_7	125	206	1.1	T	23-07-2021	IPR013763	Cyclin-like
Meg22_1012_Bin_233_Lokiarchaeota	Meg22_1012_Bin_233_scaffold_1145_27_10	3fcba7763fb83f093fafefd84ba41bf7	314	SMART	SM00385	cyclin_7	223	305	0.00046	T	23-07-2021	IPR013763	Cyclin-like
Meg22_1012_Bin_233_Lokiarchaeota	Meg22_1012_Bin_233_scaffold_1145_27_10	3fcba7763fb83f093fafefd84ba41bf7	314	Gene3D	G3DSA:1.10.472.170	-	22	208	3e-29	T	23-07-2021	-	-
Meg22_1012_Bin_233_Lokiarchaeota	Meg22_1012_Bin_233_scaffold_1145_27_10	3fcba7763fb83f093fafefd84ba41bf7	314	Gene3D	G3DSA:1.10.472.10	-	220	313	2.7e-19	T	23-07-2021	-	-
Meg22_1012_Bin_233_Lokiarchaeota	Meg22_1012_Bin_233_scaffold_1145_27_10	3fcba7763fb83f093fafefd84ba41bf7	314	Pfam	PF00382	Transcription factor TFIIB repeat	128	190	1.6e-12	T	23-07-2021	IPR013150	Transcription factor TFIIB, cyclin-like domain
Meg22_1012_Bin_233_Lokiarchaeota	Meg22_1012_Bin_233_scaffold_1145_27_10	3fcba7763fb83f093fafefd84ba41bf7	314	Pfam	PF00382	Transcription factor TFIIB repeat	227	296	1.1e-15	T	23-07-2021	IPR013150	Transcription factor TFIIB, cyclin-like domain
Meg22_1012_Bin_233_Lokiarchaeota	Meg22_1012_Bin_233_scaffold_1145_27_10	3fcba7763fb83f093fafefd84ba41bf7	314	CDD	cd00043	CYCLIN	127	190	6.14523e-06	T	23-07-2021	IPR013763	Cyclin-like
Meg22_1012_Bin_233_Lokiarchaeota	Meg22_1012_Bin_233_scaffold_1145_27_10	3fcba7763fb83f093fafefd84ba41bf7	314	SUPERFAMILY	SSF47954	Cyclin-like	219	308	9.45e-20	T	23-07-2021	IPR036915	Cyclin-like superfamily
Meg22_1012_Bin_233_Lokiarchaeota	Meg22_1012_Bin_233_scaffold_1145_27_10	3fcba7763fb83f093fafefd84ba41bf7	314	PRINTS	PR00685	Transcription initiation factor IIB signature	32	52	4.5e-18	T	23-07-2021	IPR000812	Transcription factor TFIIB
Meg22_1012_Bin_233_Lokiarchaeota	Meg22_1012_Bin_233_scaffold_1145_27_10	3fcba7763fb83f093fafefd84ba41bf7	314	PRINTS	PR00685	Transcription initiation factor IIB signature	291	305	4.5e-18	T	23-07-2021	IPR000812	Transcription factor TFIIB
Meg22_1012_Bin_233_Lokiarchaeota	Meg22_1012_Bin_233_scaffold_1145_27_10	3fcba7763fb83f093fafefd84ba41bf7	314	PRINTS	PR00685	Transcription initiation factor IIB signature	259	275	4.5e-18	T	23-07-2021	IPR000812	Transcription factor TFIIB
Meg22_1012_Bin_233_Lokiarchaeota	Meg22_1012_Bin_233_scaffold_1145_27_10	3fcba7763fb83f093fafefd84ba41bf7	314	PRINTS	PR00685	Transcription initiation factor IIB signature	224	242	4.5e-18	T	23-07-2021	IPR000812	Transcription factor TFIIB
Meg22_1012_Bin_233_Lokiarchaeota	Meg22_1012_Bin_233_scaffold_1145_27_10	3fcba7763fb83f093fafefd84ba41bf7	314	PRINTS	PR00685	Transcription initiation factor IIB signature	193	208	4.5e-18	T	23-07-2021	IPR000812	Transcription factor TFIIB
Meg22_1012_Bin_233_Lokiarchaeota	Meg22_1012_Bin_233_scaffold_1145_27_10	3fcba7763fb83f093fafefd84ba41bf7	314	SUPERFAMILY	SSF47954	Cyclin-like	123	206	4.54e-16	T	23-07-2021	IPR036915	Cyclin-like superfamily
Meg22_1416_Bin_151_Lokiarchaeota	Meg22_1416_Bin_151_scaffold_421_13_10	3fcba7763fb83f093fafefd84ba41bf7	314	PANTHER	PTHR11618:SF13	TRANSCRIPTION INITIATION FACTOR IIB	23	308	6e-39	T	23-07-2021	-	-
Meg22_1416_Bin_151_Lokiarchaeota	Meg22_1416_Bin_151_scaffold_421_13_10	3fcba7763fb83f093fafefd84ba41bf7	314	CDD	cd00043	CYCLIN	219	303	6.47011e-08	T	23-07-2021	IPR013763	Cyclin-like
Meg22_1416_Bin_151_Lokiarchaeota	Meg22_1416_Bin_151_scaffold_421_13_10	3fcba7763fb83f093fafefd84ba41bf7	314	PANTHER	PTHR11618	TRANSCRIPTION INITIATION FACTOR IIB-RELATED	23	308	6e-39	T	23-07-2021	IPR000812	Transcription factor TFIIB
Meg22_1416_Bin_151_Lokiarchaeota	Meg22_1416_Bin_151_scaffold_421_13_10	3fcba7763fb83f093fafefd84ba41bf7	314	ProSitePatterns	PS00782	Transcription factor TFIIB repeat signature.	258	273	-	T	23-07-2021	IPR023486	Transcription factor TFIIB, conserved site
Meg22_1416_Bin_151_Lokiarchaeota	Meg22_1416_Bin_151_scaffold_421_13_10	3fcba7763fb83f093fafefd84ba41bf7	314	SMART	SM00385	cyclin_7	125	206	1.1	T	23-07-2021	IPR013763	Cyclin-like
Meg22_1416_Bin_151_Lokiarchaeota	Meg22_1416_Bin_151_scaffold_421_13_10	3fcba7763fb83f093fafefd84ba41bf7	314	SMART	SM00385	cyclin_7	223	305	0.00046	T	23-07-2021	IPR013763	Cyclin-like
Meg22_1416_Bin_151_Lokiarchaeota	Meg22_1416_Bin_151_scaffold_421_13_10	3fcba7763fb83f093fafefd84ba41bf7	314	Gene3D	G3DSA:1.10.472.170	-	22	208	3e-29	T	23-07-2021	-	-
Meg22_1416_Bin_151_Lokiarchaeota	Meg22_1416_Bin_151_scaffold_421_13_10	3fcba7763fb83f093fafefd84ba41bf7	314	Gene3D	G3DSA:1.10.472.10	-	220	313	2.7e-19	T	23-07-2021	-	-
Meg22_1416_Bin_151_Lokiarchaeota	Meg22_1416_Bin_151_scaffold_421_13_10	3fcba7763fb83f093fafefd84ba41bf7	314	Pfam	PF00382	Transcription factor TFIIB repeat	128	190	1.6e-12	T	23-07-2021	IPR013150	Transcription factor TFIIB, cyclin-like domain
Meg22_1416_Bin_151_Lokiarchaeota	Meg22_1416_Bin_151_scaffold_421_13_10	3fcba7763fb83f093fafefd84ba41bf7	314	Pfam	PF00382	Transcription factor TFIIB repeat	227	296	1.1e-15	T	23-07-2021	IPR013150	Transcription factor TFIIB, cyclin-like domain
Meg22_1416_Bin_151_Lokiarchaeota	Meg22_1416_Bin_151_scaffold_421_13_10	3fcba7763fb83f093fafefd84ba41bf7	314	CDD	cd00043	CYCLIN	127	190	6.14523e-06	T	23-07-2021	IPR013763	Cyclin-like
Meg22_1416_Bin_151_Lokiarchaeota	Meg22_1416_Bin_151_scaffold_421_13_10	3fcba7763fb83f093fafefd84ba41bf7	314	SUPERFAMILY	SSF47954	Cyclin-like	219	308	9.45e-20	T	23-07-2021	IPR036915	Cyclin-like superfamily
Meg22_1416_Bin_151_Lokiarchaeota	Meg22_1416_Bin_151_scaffold_421_13_10	3fcba7763fb83f093fafefd84ba41bf7	314	PRINTS	PR00685	Transcription initiation factor IIB signature	32	52	4.5e-18	T	23-07-2021	IPR000812	Transcription factor TFIIB
Meg22_1416_Bin_151_Lokiarchaeota	Meg22_1416_Bin_151_scaffold_421_13_10	3fcba7763fb83f093fafefd84ba41bf7	314	PRINTS	PR00685	Transcription initiation factor IIB signature	291	305	4.5e-18	T	23-07-2021	IPR000812	Transcription factor TFIIB
Meg22_1416_Bin_151_Lokiarchaeota	Meg22_1416_Bin_151_scaffold_421_13_10	3fcba7763fb83f093fafefd84ba41bf7	314	PRINTS	PR00685	Transcription initiation factor IIB signature	259	275	4.5e-18	T	23-07-2021	IPR000812	Transcription factor TFIIB
Meg22_1416_Bin_151_Lokiarchaeota	Meg22_1416_Bin_151_scaffold_421_13_10	3fcba7763fb83f093fafefd84ba41bf7	314	PRINTS	PR00685	Transcription initiation factor IIB signature	224	242	4.5e-18	T	23-07-2021	IPR000812	Transcription factor TFIIB
Meg22_1416_Bin_151_Lokiarchaeota	Meg22_1416_Bin_151_scaffold_421_13_10	3fcba7763fb83f093fafefd84ba41bf7	314	PRINTS	PR00685	Transcription initiation factor IIB signature	193	208	4.5e-18	T	23-07-2021	IPR000812	Transcription factor TFIIB
Meg22_1416_Bin_151_Lokiarchaeota	Meg22_1416_Bin_151_scaffold_421_13_10	3fcba7763fb83f093fafefd84ba41bf7	314	SUPERFAMILY	SSF47954	Cyclin-like	123	206	4.54e-16	T	23-07-2021	IPR036915	Cyclin-like superfamily
Meg22_1214_Bin_191_Lokiarchaeota	Meg22_1214_Bin_191_scaffold_1524_21_10	3fcba7763fb83f093fafefd84ba41bf7	314	PANTHER	PTHR11618:SF13	TRANSCRIPTION INITIATION FACTOR IIB	23	308	6e-39	T	23-07-2021	-	-
Meg22_1214_Bin_191_Lokiarchaeota	Meg22_1214_Bin_191_scaffold_1524_21_10	3fcba7763fb83f093fafefd84ba41bf7	314	CDD	cd00043	CYCLIN	219	303	6.47011e-08	T	23-07-2021	IPR013763	Cyclin-like
Meg22_1214_Bin_191_Lokiarchaeota	Meg22_1214_Bin_191_scaffold_1524_21_10	3fcba7763fb83f093fafefd84ba41bf7	314	PANTHER	PTHR11618	TRANSCRIPTION INITIATION FACTOR IIB-RELATED	23	308	6e-39	T	23-07-2021	IPR000812	Transcription factor TFIIB
Meg22_1214_Bin_191_Lokiarchaeota	Meg22_1214_Bin_191_scaffold_1524_21_10	3fcba7763fb83f093fafefd84ba41bf7	314	ProSitePatterns	PS00782	Transcription factor TFIIB repeat signature.	258	273	-	T	23-07-2021	IPR023486	Transcription factor TFIIB, conserved site
Meg22_1214_Bin_191_Lokiarchaeota	Meg22_1214_Bin_191_scaffold_1524_21_10	3fcba7763fb83f093fafefd84ba41bf7	314	SMART	SM00385	cyclin_7	125	206	1.1	T	23-07-2021	IPR013763	Cyclin-like
Meg22_1214_Bin_191_Lokiarchaeota	Meg22_1214_Bin_191_scaffold_1524_21_10	3fcba7763fb83f093fafefd84ba41bf7	314	SMART	SM00385	cyclin_7	223	305	0.00046	T	23-07-2021	IPR013763	Cyclin-like
Meg22_1214_Bin_191_Lokiarchaeota	Meg22_1214_Bin_191_scaffold_1524_21_10	3fcba7763fb83f093fafefd84ba41bf7	314	Gene3D	G3DSA:1.10.472.170	-	22	208	3e-29	T	23-07-2021	-	-
Meg22_1214_Bin_191_Lokiarchaeota	Meg22_1214_Bin_191_scaffold_1524_21_10	3fcba7763fb83f093fafefd84ba41bf7	314	Gene3D	G3DSA:1.10.472.10	-	220	313	2.7e-19	T	23-07-2021	-	-
Meg22_1214_Bin_191_Lokiarchaeota	Meg22_1214_Bin_191_scaffold_1524_21_10	3fcba7763fb83f093fafefd84ba41bf7	314	Pfam	PF00382	Transcription factor TFIIB repeat	128	190	1.6e-12	T	23-07-2021	IPR013150	Transcription factor TFIIB, cyclin-like domain
Meg22_1214_Bin_191_Lokiarchaeota	Meg22_1214_Bin_191_scaffold_1524_21_10	3fcba7763fb83f093fafefd84ba41bf7	314	Pfam	PF00382	Transcription factor TFIIB repeat	227	296	1.1e-15	T	23-07-2021	IPR013150	Transcription factor TFIIB, cyclin-like domain
Meg22_1214_Bin_191_Lokiarchaeota	Meg22_1214_Bin_191_scaffold_1524_21_10	3fcba7763fb83f093fafefd84ba41bf7	314	CDD	cd00043	CYCLIN	127	190	6.14523e-06	T	23-07-2021	IPR013763	Cyclin-like
Meg22_1214_Bin_191_Lokiarchaeota	Meg22_1214_Bin_191_scaffold_1524_21_10	3fcba7763fb83f093fafefd84ba41bf7	314	SUPERFAMILY	SSF47954	Cyclin-like	219	308	9.45e-20	T	23-07-2021	IPR036915	Cyclin-like superfamily
Meg22_1214_Bin_191_Lokiarchaeota	Meg22_1214_Bin_191_scaffold_1524_21_10	3fcba7763fb83f093fafefd84ba41bf7	314	PRINTS	PR00685	Transcription initiation factor IIB signature	32	52	4.5e-18	T	23-07-2021	IPR000812	Transcription factor TFIIB
Meg22_1214_Bin_191_Lokiarchaeota	Meg22_1214_Bin_191_scaffold_1524_21_10	3fcba7763fb83f093fafefd84ba41bf7	314	PRINTS	PR00685	Transcription initiation factor IIB signature	291	305	4.5e-18	T	23-07-2021	IPR000812	Transcription factor TFIIB
Meg22_1214_Bin_191_Lokiarchaeota	Meg22_1214_Bin_191_scaffold_1524_21_10	3fcba7763fb83f093fafefd84ba41bf7	314	PRINTS	PR00685	Transcription initiation factor IIB signature	259	275	4.5e-18	T	23-07-2021	IPR000812	Transcription factor TFIIB
Meg22_1214_Bin_191_Lokiarchaeota	Meg22_1214_Bin_191_scaffold_1524_21_10	3fcba7763fb83f093fafefd84ba41bf7	314	PRINTS	PR00685	Transcription initiation factor IIB signature	224	242	4.5e-18	T	23-07-2021	IPR000812	Transcription factor TFIIB
Meg22_1214_Bin_191_Lokiarchaeota	Meg22_1214_Bin_191_scaffold_1524_21_10	3fcba7763fb83f093fafefd84ba41bf7	314	PRINTS	PR00685	Transcription initiation factor IIB signature	193	208	4.5e-18	T	23-07-2021	IPR000812	Transcription factor TFIIB
Meg22_1214_Bin_191_Lokiarchaeota	Meg22_1214_Bin_191_scaffold_1524_21_10	3fcba7763fb83f093fafefd84ba41bf7	314	SUPERFAMILY	SSF47954	Cyclin-like	123	206	4.54e-16	T	23-07-2021	IPR036915	Cyclin-like superfamily
Meg19_1012_Bin_504_Helarchaeota	Meg19_1012_Bin_504_scaffold_401_3_108	6d8520070f8f1f93bb4ca959dd978cbd	272	PIRSF	PIRSF001430	PSU-A	1	243	6.6e-59	T	23-07-2021	IPR001406	Pseudouridine synthase I, TruA
Meg19_1012_Bin_504_Helarchaeota	Meg19_1012_Bin_504_scaffold_401_3_108	6d8520070f8f1f93bb4ca959dd978cbd	272	SUPERFAMILY	SSF55120	Pseudouridine synthase	1	230	1.01e-55	T	23-07-2021	IPR020103	Pseudouridine synthase, catalytic domain superfamily
Meg19_1012_Bin_504_Helarchaeota	Meg19_1012_Bin_504_scaffold_401_3_108	6d8520070f8f1f93bb4ca959dd978cbd	272	TIGRFAM	TIGR00071	hisT_truA: tRNA pseudouridine(38-40) synthase	4	202	4.6e-54	T	23-07-2021	IPR001406	Pseudouridine synthase I, TruA
Meg19_1012_Bin_504_Helarchaeota	Meg19_1012_Bin_504_scaffold_401_3_108	6d8520070f8f1f93bb4ca959dd978cbd	272	Pfam	PF01416	tRNA pseudouridine synthase	124	214	1.5e-18	T	23-07-2021	IPR020097	Pseudouridine synthase I, TruA, alpha/beta domain
Meg19_1012_Bin_504_Helarchaeota	Meg19_1012_Bin_504_scaffold_401_3_108	6d8520070f8f1f93bb4ca959dd978cbd	272	Hamap	MF_00171	tRNA pseudouridine synthase A [truA].	1	228	25.9746	T	23-07-2021	IPR001406	Pseudouridine synthase I, TruA
Meg19_1012_Bin_504_Helarchaeota	Meg19_1012_Bin_504_scaffold_401_3_108	6d8520070f8f1f93bb4ca959dd978cbd	272	Gene3D	G3DSA:3.30.70.580	-	1	99	6.4e-21	T	23-07-2021	-	-
Meg19_1012_Bin_504_Helarchaeota	Meg19_1012_Bin_504_scaffold_401_3_108	6d8520070f8f1f93bb4ca959dd978cbd	272	PANTHER	PTHR11142:SF5	TRNA PSEUDOURIDINE(38/39) SYNTHASE	3	263	3.7e-52	T	23-07-2021	-	-
Meg19_1012_Bin_504_Helarchaeota	Meg19_1012_Bin_504_scaffold_401_3_108	6d8520070f8f1f93bb4ca959dd978cbd	272	PANTHER	PTHR11142	PSEUDOURIDYLATE SYNTHASE	3	263	3.7e-52	T	23-07-2021	IPR001406	Pseudouridine synthase I, TruA
Meg19_1012_Bin_504_Helarchaeota	Meg19_1012_Bin_504_scaffold_401_3_108	6d8520070f8f1f93bb4ca959dd978cbd	272	Gene3D	G3DSA:3.30.70.660	-	100	214	5.7e-21	T	23-07-2021	IPR020095	Pseudouridine synthase I, TruA, C-terminal
Meg22_1416_Bin_151_Lokiarchaeota	Meg22_1416_Bin_151_scaffold_3197_60_22	af9718618b94479b9dbb4fe568287767	343	Pfam	PF07944	Beta-L-arabinofuranosidase, GH127	3	257	1.1e-78	T	23-07-2021	IPR012878	Beta-L-arabinofuranosidase, GH127
Meg22_1416_Bin_151_Lokiarchaeota	Meg22_1416_Bin_151_scaffold_3197_60_22	af9718618b94479b9dbb4fe568287767	343	PANTHER	PTHR43465	DUF1680 DOMAIN PROTEIN (AFU_ORTHOLOGUE AFUA_1G08910)	1	333	2.5e-110	T	23-07-2021	-	-
Meg19_1012_Bin_504_Helarchaeota	Meg19_1012_Bin_504_scaffold_2027_26_23	839afe42cc06d558d8fab1479fc26f6d	131	Coils	Coil	Coil	7	27	-	T	23-07-2021	-	-
Meg19_1012_Bin_504_Helarchaeota	Meg19_1012_Bin_504_scaffold_2027_26_23	839afe42cc06d558d8fab1479fc26f6d	131	Pfam	PF05942	Archaeal PaREP1/PaREP8 family	13	99	6.6e-08	T	23-07-2021	IPR010268	Archaeal PaREP1
Meg19_1012_Bin_504_Helarchaeota	Meg19_1012_Bin_504_scaffold_2027_26_23	839afe42cc06d558d8fab1479fc26f6d	131	Gene3D	G3DSA:1.20.120.330	Nucleotidyltransferases domain 2	10	129	2.9e-05	T	23-07-2021	-	-
Meg22_1416_Bin_151_Lokiarchaeota	Meg22_1416_Bin_151_scaffold_2340_48_21	a71002705c7c52a2e9091a6b78183da3	117	Gene3D	G3DSA:3.30.450.30	Dynein light chain 2a	1	117	1.6e-19	T	23-07-2021	-	-
Meg22_1416_Bin_151_Lokiarchaeota	Meg22_1416_Bin_151_scaffold_2340_48_21	a71002705c7c52a2e9091a6b78183da3	117	SUPERFAMILY	SSF103196	Roadblock/LC7 domain	3	117	3.79e-17	T	23-07-2021	-	-
Meg22_1416_Bin_151_Lokiarchaeota	Meg22_1416_Bin_151_scaffold_2340_48_21	a71002705c7c52a2e9091a6b78183da3	117	SMART	SM00960	Robl_LC7_a_2	5	93	1.6e-13	T	23-07-2021	IPR004942	Roadblock/LAMTOR2 domain
Meg22_1416_Bin_151_Lokiarchaeota	Meg22_1416_Bin_151_scaffold_2340_48_21	a71002705c7c52a2e9091a6b78183da3	117	Pfam	PF03259	Roadblock/LC7 domain	5	93	9.5e-11	T	23-07-2021	IPR004942	Roadblock/LAMTOR2 domain
Meg22_1012_Bin_233_Lokiarchaeota	Meg22_1012_Bin_233_scaffold_6507_53_12	a71002705c7c52a2e9091a6b78183da3	117	Gene3D	G3DSA:3.30.450.30	Dynein light chain 2a	1	117	1.6e-19	T	23-07-2021	-	-
Meg22_1012_Bin_233_Lokiarchaeota	Meg22_1012_Bin_233_scaffold_6507_53_12	a71002705c7c52a2e9091a6b78183da3	117	SUPERFAMILY	SSF103196	Roadblock/LC7 domain	3	117	3.79e-17	T	23-07-2021	-	-
Meg22_1012_Bin_233_Lokiarchaeota	Meg22_1012_Bin_233_scaffold_6507_53_12	a71002705c7c52a2e9091a6b78183da3	117	SMART	SM00960	Robl_LC7_a_2	5	93	1.6e-13	T	23-07-2021	IPR004942	Roadblock/LAMTOR2 domain
Meg22_1012_Bin_233_Lokiarchaeota	Meg22_1012_Bin_233_scaffold_6507_53_12	a71002705c7c52a2e9091a6b78183da3	117	Pfam	PF03259	Roadblock/LC7 domain	5	93	9.5e-11	T	23-07-2021	IPR004942	Roadblock/LAMTOR2 domain
Meg22_1214_Bin_191_Lokiarchaeota	Meg22_1214_Bin_191_scaffold_7758_59_12	a71002705c7c52a2e9091a6b78183da3	117	Gene3D	G3DSA:3.30.450.30	Dynein light chain 2a	1	117	1.6e-19	T	23-07-2021	-	-
Meg22_1214_Bin_191_Lokiarchaeota	Meg22_1214_Bin_191_scaffold_7758_59_12	a71002705c7c52a2e9091a6b78183da3	117	SUPERFAMILY	SSF103196	Roadblock/LC7 domain	3	117	3.79e-17	T	23-07-2021	-	-
Meg22_1214_Bin_191_Lokiarchaeota	Meg22_1214_Bin_191_scaffold_7758_59_12	a71002705c7c52a2e9091a6b78183da3	117	SMART	SM00960	Robl_LC7_a_2	5	93	1.6e-13	T	23-07-2021	IPR004942	Roadblock/LAMTOR2 domain
Meg22_1214_Bin_191_Lokiarchaeota	Meg22_1214_Bin_191_scaffold_7758_59_12	a71002705c7c52a2e9091a6b78183da3	117	Pfam	PF03259	Roadblock/LC7 domain	5	93	9.5e-11	T	23-07-2021	IPR004942	Roadblock/LAMTOR2 domain
Meg19_1012_Bin_504_Helarchaeota	Meg19_1012_Bin_504_scaffold_812_6_99	0e27dae47043bdadcfd6fd67fc4d29dc	79	Gene3D	G3DSA:3.20.70.20	-	22	77	4.7e-10	T	23-07-2021	-	-
Meg19_1012_Bin_504_Helarchaeota	Meg19_1012_Bin_504_scaffold_812_6_99	0e27dae47043bdadcfd6fd67fc4d29dc	79	SUPERFAMILY	SSF51998	PFL-like glycyl radical enzymes	20	73	6.87e-06	T	23-07-2021	-	-
Meg19_1012_Bin_504_Helarchaeota	Meg19_1012_Bin_504_scaffold_812_6_99	0e27dae47043bdadcfd6fd67fc4d29dc	79	ProSiteProfiles	PS51554	Pyruvate formate-lyase domain profile.	24	79	10.583	T	23-07-2021	IPR004184	Pyruvate formate lyase domain
Meg19_1012_Bin_504_Helarchaeota	Meg19_1012_Bin_504_scaffold_21379_92_7	6e398e4daaa9659b1371f7de871bf2a8	74	Hamap	MF_00422	Protein translocase subunit SecE [secE].	7	62	11.5801	T	23-07-2021	IPR001901	Protein translocase complex, SecE/Sec61-gamma subunit
Meg19_1012_Bin_504_Helarchaeota	Meg19_1012_Bin_504_scaffold_21379_92_7	6e398e4daaa9659b1371f7de871bf2a8	74	Gene3D	G3DSA:1.20.5.820	Preprotein translocase SecE subunit	1	69	3.4e-15	T	23-07-2021	IPR023391	Protein translocase SecE domain superfamily
Meg19_1012_Bin_504_Helarchaeota	Meg19_1012_Bin_504_scaffold_21379_92_7	6e398e4daaa9659b1371f7de871bf2a8	74	TIGRFAM	TIGR00327	secE_euk_arch: protein translocase SEC61 complex gamma subunit, archaeal and eukaryotic	6	63	1.9e-12	T	23-07-2021	IPR008158	Protein translocase SEC61 complex, gamma subunit
Meg19_1012_Bin_504_Helarchaeota	Meg19_1012_Bin_504_scaffold_21379_92_7	6e398e4daaa9659b1371f7de871bf2a8	74	SUPERFAMILY	SSF103456	Preprotein translocase SecE subunit	7	62	1.31e-12	T	23-07-2021	IPR023391	Protein translocase SecE domain superfamily
Meg19_1012_Bin_504_Helarchaeota	Meg19_1012_Bin_504_scaffold_21379_92_7	6e398e4daaa9659b1371f7de871bf2a8	74	Pfam	PF00584	SecE/Sec61-gamma subunits of protein translocation complex	10	63	4e-09	T	23-07-2021	IPR001901	Protein translocase complex, SecE/Sec61-gamma subunit
Meg19_1012_Bin_504_Helarchaeota	Meg19_1012_Bin_504_scaffold_16518_85_8	605a8c340e9aee70cc967b4a2b29c3e6	353	Pfam	PF05343	M42 glutamyl aminopeptidase	44	337	9.8e-92	T	23-07-2021	IPR008007	Peptidase M42
Meg19_1012_Bin_504_Helarchaeota	Meg19_1012_Bin_504_scaffold_16518_85_8	605a8c340e9aee70cc967b4a2b29c3e6	353	Gene3D	G3DSA:3.40.630.10	Zn peptidases	7	337	3.7e-116	T	23-07-2021	-	-
Meg19_1012_Bin_504_Helarchaeota	Meg19_1012_Bin_504_scaffold_16518_85_8	605a8c340e9aee70cc967b4a2b29c3e6	353	SUPERFAMILY	SSF53187	Zn-dependent exopeptidases	3	344	3.03e-63	T	23-07-2021	-	-
Meg19_1012_Bin_504_Helarchaeota	Meg19_1012_Bin_504_scaffold_16518_85_8	605a8c340e9aee70cc967b4a2b29c3e6	353	SUPERFAMILY	SSF101821	Aminopeptidase/glucanase lid domain	69	178	5.65e-26	T	23-07-2021	-	-
Meg19_1012_Bin_504_Helarchaeota	Meg19_1012_Bin_504_scaffold_16518_85_8	605a8c340e9aee70cc967b4a2b29c3e6	353	Coils	Coil	Coil	328	348	-	T	23-07-2021	-	-
Meg19_1012_Bin_504_Helarchaeota	Meg19_1012_Bin_504_scaffold_16518_85_8	605a8c340e9aee70cc967b4a2b29c3e6	353	Gene3D	G3DSA:2.40.30.40	Aminopeptidase/glucanase lid domain; domain 2	68	161	3.7e-116	T	23-07-2021	IPR023367	Peptidase M42, domain 2
Meg19_1012_Bin_504_Helarchaeota	Meg19_1012_Bin_504_scaffold_16518_85_8	605a8c340e9aee70cc967b4a2b29c3e6	353	PANTHER	PTHR32481	AMINOPEPTIDASE	3	351	1.4e-110	T	23-07-2021	-	-
Meg19_1012_Bin_504_Helarchaeota	Meg19_1012_Bin_504_scaffold_16518_85_8	605a8c340e9aee70cc967b4a2b29c3e6	353	CDD	cd05656	M42_Frv	5	342	3.55784e-141	T	23-07-2021	-	-
Meg19_1012_Bin_504_Helarchaeota	Meg19_1012_Bin_504_scaffold_16518_85_8	605a8c340e9aee70cc967b4a2b29c3e6	353	PIRSF	PIRSF001123	PepA_GA	1	352	2e-110	T	23-07-2021	IPR008007	Peptidase M42
Meg19_1012_Bin_504_Helarchaeota	Meg19_1012_Bin_504_scaffold_16518_85_8	605a8c340e9aee70cc967b4a2b29c3e6	353	PANTHER	PTHR32481:SF20	AMINOPEPTIDASE YSDC-RELATED	3	351	1.4e-110	T	23-07-2021	-	-
Meg22_1214_Bin_191_Lokiarchaeota	Meg22_1214_Bin_191_scaffold_395_7_19	fe7943ad694bd006bb1971543dc79061	242	Pfam	PF08423	Rad51	11	139	1.2e-14	T	23-07-2021	IPR013632	DNA recombination and repair protein Rad51-like, C-terminal
Meg22_1214_Bin_191_Lokiarchaeota	Meg22_1214_Bin_191_scaffold_395_7_19	fe7943ad694bd006bb1971543dc79061	242	SUPERFAMILY	SSF52540	P-loop containing nucleoside triphosphate hydrolases	10	197	7.25e-12	T	23-07-2021	IPR027417	P-loop containing nucleoside triphosphate hydrolase
Meg22_1214_Bin_191_Lokiarchaeota	Meg22_1214_Bin_191_scaffold_395_7_19	fe7943ad694bd006bb1971543dc79061	242	Gene3D	G3DSA:3.40.50.300	-	1	221	6e-21	T	23-07-2021	-	-
Meg22_1214_Bin_191_Lokiarchaeota	Meg22_1214_Bin_191_scaffold_395_7_19	fe7943ad694bd006bb1971543dc79061	242	PANTHER	PTHR22942	RECA/RAD51/RADA DNA STRAND-PAIRING FAMILY MEMBER	10	139	7.4e-14	T	23-07-2021	-	-
Meg22_1012_Bin_233_Lokiarchaeota	Meg22_1012_Bin_233_scaffold_178_15_23	fe7943ad694bd006bb1971543dc79061	242	Pfam	PF08423	Rad51	11	139	1.2e-14	T	23-07-2021	IPR013632	DNA recombination and repair protein Rad51-like, C-terminal
Meg22_1012_Bin_233_Lokiarchaeota	Meg22_1012_Bin_233_scaffold_178_15_23	fe7943ad694bd006bb1971543dc79061	242	SUPERFAMILY	SSF52540	P-loop containing nucleoside triphosphate hydrolases	10	197	7.25e-12	T	23-07-2021	IPR027417	P-loop containing nucleoside triphosphate hydrolase
Meg22_1012_Bin_233_Lokiarchaeota	Meg22_1012_Bin_233_scaffold_178_15_23	fe7943ad694bd006bb1971543dc79061	242	Gene3D	G3DSA:3.40.50.300	-	1	221	6e-21	T	23-07-2021	-	-
Meg22_1012_Bin_233_Lokiarchaeota	Meg22_1012_Bin_233_scaffold_178_15_23	fe7943ad694bd006bb1971543dc79061	242	PANTHER	PTHR22942	RECA/RAD51/RADA DNA STRAND-PAIRING FAMILY MEMBER	10	139	7.4e-14	T	23-07-2021	-	-
Meg22_1416_Bin_151_Lokiarchaeota	Meg22_1416_Bin_151_scaffold_250_7_69	fe7943ad694bd006bb1971543dc79061	242	Pfam	PF08423	Rad51	11	139	1.2e-14	T	23-07-2021	IPR013632	DNA recombination and repair protein Rad51-like, C-terminal
Meg22_1416_Bin_151_Lokiarchaeota	Meg22_1416_Bin_151_scaffold_250_7_69	fe7943ad694bd006bb1971543dc79061	242	SUPERFAMILY	SSF52540	P-loop containing nucleoside triphosphate hydrolases	10	197	7.25e-12	T	23-07-2021	IPR027417	P-loop containing nucleoside triphosphate hydrolase
Meg22_1416_Bin_151_Lokiarchaeota	Meg22_1416_Bin_151_scaffold_250_7_69	fe7943ad694bd006bb1971543dc79061	242	Gene3D	G3DSA:3.40.50.300	-	1	221	6e-21	T	23-07-2021	-	-
Meg22_1416_Bin_151_Lokiarchaeota	Meg22_1416_Bin_151_scaffold_250_7_69	fe7943ad694bd006bb1971543dc79061	242	PANTHER	PTHR22942	RECA/RAD51/RADA DNA STRAND-PAIRING FAMILY MEMBER	10	139	7.4e-14	T	23-07-2021	-	-
Meg19_1012_Bin_504_Helarchaeota	Meg19_1012_Bin_504_scaffold_367_1_47	c56a8538f00e7f7ab41e9510abe8d848	349	PANTHER	PTHR45947:SF8	ALPHA-MONOGLUCOSYLDIACYLGLYCEROL SYNTHASE	21	345	1.2e-33	T	23-07-2021	-	-
Meg19_1012_Bin_504_Helarchaeota	Meg19_1012_Bin_504_scaffold_367_1_47	c56a8538f00e7f7ab41e9510abe8d848	349	Pfam	PF00534	Glycosyl transferases group 1	151	322	1.5e-28	T	23-07-2021	IPR001296	Glycosyl transferase, family 1
Meg19_1012_Bin_504_Helarchaeota	Meg19_1012_Bin_504_scaffold_367_1_47	c56a8538f00e7f7ab41e9510abe8d848	349	CDD	cd03801	GT4_PimA-like	16	342	1.87939e-41	T	23-07-2021	-	-
Meg19_1012_Bin_504_Helarchaeota	Meg19_1012_Bin_504_scaffold_367_1_47	c56a8538f00e7f7ab41e9510abe8d848	349	SUPERFAMILY	SSF53756	UDP-Glycosyltransferase/glycogen phosphorylase	13	346	8.37e-54	T	23-07-2021	-	-
Meg19_1012_Bin_504_Helarchaeota	Meg19_1012_Bin_504_scaffold_367_1_47	c56a8538f00e7f7ab41e9510abe8d848	349	Gene3D	G3DSA:3.40.50.2000	Glycogen Phosphorylase B;	15	341	9.5e-53	T	23-07-2021	-	-
Meg19_1012_Bin_504_Helarchaeota	Meg19_1012_Bin_504_scaffold_367_1_47	c56a8538f00e7f7ab41e9510abe8d848	349	Pfam	PF13439	Glycosyltransferase Family 4	22	138	5e-07	T	23-07-2021	IPR028098	Glycosyltransferase subfamily 4-like, N-terminal domain
Meg19_1012_Bin_504_Helarchaeota	Meg19_1012_Bin_504_scaffold_367_1_47	c56a8538f00e7f7ab41e9510abe8d848	349	PANTHER	PTHR45947	SULFOQUINOVOSYL TRANSFERASE SQD2	21	345	1.2e-33	T	23-07-2021	-	-
Meg19_1012_Bin_504_Helarchaeota	Meg19_1012_Bin_504_scaffold_367_1_47	c56a8538f00e7f7ab41e9510abe8d848	349	Gene3D	G3DSA:3.40.50.2000	Glycogen Phosphorylase B;	142	328	9.5e-53	T	23-07-2021	-	-
Meg19_1012_Bin_504_Helarchaeota	Meg19_1012_Bin_504_scaffold_31173_99_7	ee201f016fbf085936043b910eb888ad	353	Pfam	PF13685	Iron-containing alcohol dehydrogenase	15	276	1.3e-65	T	23-07-2021	IPR032837	Glycerol-1-phosphate dehydrogenase
Meg19_1012_Bin_504_Helarchaeota	Meg19_1012_Bin_504_scaffold_31173_99_7	ee201f016fbf085936043b910eb888ad	353	PANTHER	PTHR43616	GLYCEROL DEHYDROGENASE	5	352	2.7e-99	T	23-07-2021	IPR016205	Glycerol dehydrogenase
Meg19_1012_Bin_504_Helarchaeota	Meg19_1012_Bin_504_scaffold_31173_99_7	ee201f016fbf085936043b910eb888ad	353	Gene3D	G3DSA:3.40.50.1970	-	3	161	2.7e-32	T	23-07-2021	-	-
Meg19_1012_Bin_504_Helarchaeota	Meg19_1012_Bin_504_scaffold_31173_99_7	ee201f016fbf085936043b910eb888ad	353	SUPERFAMILY	SSF56796	Dehydroquinate synthase-like	7	346	2.22e-67	T	23-07-2021	-	-
Meg19_1012_Bin_504_Helarchaeota	Meg19_1012_Bin_504_scaffold_31173_99_7	ee201f016fbf085936043b910eb888ad	353	PIRSF	PIRSF000112	Glycerol_dh	1	348	5.1e-63	T	23-07-2021	IPR016205	Glycerol dehydrogenase
Meg19_1012_Bin_504_Helarchaeota	Meg19_1012_Bin_504_scaffold_31173_99_7	ee201f016fbf085936043b910eb888ad	353	CDD	cd08173	Gro1PDH	9	352	2.98669e-167	T	23-07-2021	-	-
Meg19_1012_Bin_504_Helarchaeota	Meg19_1012_Bin_504_scaffold_31173_99_7	ee201f016fbf085936043b910eb888ad	353	Hamap	MF_00497_A	Glycerol-1-phosphate dehydrogenase [NAD(P)+] [egsA].	6	352	42.0423	T	23-07-2021	IPR023002	Glycerol-1-phosphate dehydrogenase, archaea
Meg19_1012_Bin_504_Helarchaeota	Meg19_1012_Bin_504_scaffold_31173_99_7	ee201f016fbf085936043b910eb888ad	353	Gene3D	G3DSA:1.20.1090.10	-	163	353	1.1e-59	T	23-07-2021	-	-
Meg19_1012_Bin_504_Helarchaeota	Meg19_1012_Bin_504_scaffold_31173_99_7	ee201f016fbf085936043b910eb888ad	353	PANTHER	PTHR43616:SF5	GLYCEROL DEHYDROGENASE 1	5	352	2.7e-99	T	23-07-2021	-	-
Meg22_1416_Bin_151_Lokiarchaeota	Meg22_1416_Bin_151_scaffold_2266_47_33	77c780cdfed9a2b944ae647d24e2b0c2	80	PANTHER	PTHR43600:SF2	HYDROGENASE LARGE SUBUNIT	5	73	7.8e-13	T	23-07-2021	-	-
Meg22_1416_Bin_151_Lokiarchaeota	Meg22_1416_Bin_151_scaffold_2266_47_33	77c780cdfed9a2b944ae647d24e2b0c2	80	PANTHER	PTHR43600	COENZYME F420 HYDROGENASE, SUBUNIT ALPHA	5	73	7.8e-13	T	23-07-2021	-	-
Meg22_1416_Bin_151_Lokiarchaeota	Meg22_1416_Bin_151_scaffold_2266_47_33	77c780cdfed9a2b944ae647d24e2b0c2	80	Gene3D	G3DSA:1.10.645.10	-	1	77	2.1e-11	T	23-07-2021	IPR029014	[NiFe]-hydrogenase, large subunit
Meg22_1416_Bin_151_Lokiarchaeota	Meg22_1416_Bin_151_scaffold_2266_47_33	77c780cdfed9a2b944ae647d24e2b0c2	80	SUPERFAMILY	SSF56762	HydB/Nqo4-like	6	60	7.33e-12	T	23-07-2021	IPR029014	[NiFe]-hydrogenase, large subunit
Meg22_1012_Bin_233_Lokiarchaeota	Meg22_1012_Bin_233_scaffold_193_17_160	77c780cdfed9a2b944ae647d24e2b0c2	80	PANTHER	PTHR43600:SF2	HYDROGENASE LARGE SUBUNIT	5	73	7.8e-13	T	23-07-2021	-	-
Meg22_1012_Bin_233_Lokiarchaeota	Meg22_1012_Bin_233_scaffold_193_17_160	77c780cdfed9a2b944ae647d24e2b0c2	80	PANTHER	PTHR43600	COENZYME F420 HYDROGENASE, SUBUNIT ALPHA	5	73	7.8e-13	T	23-07-2021	-	-
Meg22_1012_Bin_233_Lokiarchaeota	Meg22_1012_Bin_233_scaffold_193_17_160	77c780cdfed9a2b944ae647d24e2b0c2	80	Gene3D	G3DSA:1.10.645.10	-	1	77	2.1e-11	T	23-07-2021	IPR029014	[NiFe]-hydrogenase, large subunit
Meg22_1012_Bin_233_Lokiarchaeota	Meg22_1012_Bin_233_scaffold_193_17_160	77c780cdfed9a2b944ae647d24e2b0c2	80	SUPERFAMILY	SSF56762	HydB/Nqo4-like	6	60	7.33e-12	T	23-07-2021	IPR029014	[NiFe]-hydrogenase, large subunit
Meg22_1214_Bin_191_Lokiarchaeota	Meg22_1214_Bin_191_scaffold_3267_38_65	77c780cdfed9a2b944ae647d24e2b0c2	80	PANTHER	PTHR43600:SF2	HYDROGENASE LARGE SUBUNIT	5	73	7.8e-13	T	23-07-2021	-	-
Meg22_1214_Bin_191_Lokiarchaeota	Meg22_1214_Bin_191_scaffold_3267_38_65	77c780cdfed9a2b944ae647d24e2b0c2	80	PANTHER	PTHR43600	COENZYME F420 HYDROGENASE, SUBUNIT ALPHA	5	73	7.8e-13	T	23-07-2021	-	-
Meg22_1214_Bin_191_Lokiarchaeota	Meg22_1214_Bin_191_scaffold_3267_38_65	77c780cdfed9a2b944ae647d24e2b0c2	80	Gene3D	G3DSA:1.10.645.10	-	1	77	2.1e-11	T	23-07-2021	IPR029014	[NiFe]-hydrogenase, large subunit
Meg22_1214_Bin_191_Lokiarchaeota	Meg22_1214_Bin_191_scaffold_3267_38_65	77c780cdfed9a2b944ae647d24e2b0c2	80	SUPERFAMILY	SSF56762	HydB/Nqo4-like	6	60	7.33e-12	T	23-07-2021	IPR029014	[NiFe]-hydrogenase, large subunit
Meg22_1416_Bin_151_Lokiarchaeota	Meg22_1416_Bin_151_scaffold_993_26_6	78834849090ce5f18ec0d8a225d894c9	69	Pfam	PF01402	Ribbon-helix-helix protein, copG family	6	44	6e-05	T	23-07-2021	IPR002145	Ribbon-helix-helix protein, CopG
Meg22_1416_Bin_151_Lokiarchaeota	Meg22_1416_Bin_151_scaffold_993_26_6	78834849090ce5f18ec0d8a225d894c9	69	SUPERFAMILY	SSF47598	Ribbon-helix-helix	3	45	8.67e-09	T	23-07-2021	IPR010985	Ribbon-helix-helix
Meg19_1012_Bin_504_Helarchaeota	Meg19_1012_Bin_504_scaffold_2392_30_31	18b64fdf731894930e04970b430a61e4	169	Gene3D	G3DSA:3.40.50.1010	-	1	132	1e-34	T	23-07-2021	-	-
Meg19_1012_Bin_504_Helarchaeota	Meg19_1012_Bin_504_scaffold_2392_30_31	18b64fdf731894930e04970b430a61e4	169	PANTHER	PTHR12814:SF2	RNA-BINDING PROTEIN NOB1	3	98	9.5e-27	T	23-07-2021	-	-
Meg19_1012_Bin_504_Helarchaeota	Meg19_1012_Bin_504_scaffold_2392_30_31	18b64fdf731894930e04970b430a61e4	169	CDD	cd09876	PIN_Nob1-like	6	125	4.69605e-36	T	23-07-2021	IPR033411	Ribonuclease, PIN domain
Meg19_1012_Bin_504_Helarchaeota	Meg19_1012_Bin_504_scaffold_2392_30_31	18b64fdf731894930e04970b430a61e4	169	PANTHER	PTHR12814:SF2	RNA-BINDING PROTEIN NOB1	104	165	9.5e-27	T	23-07-2021	-	-
Meg19_1012_Bin_504_Helarchaeota	Meg19_1012_Bin_504_scaffold_2392_30_31	18b64fdf731894930e04970b430a61e4	169	PANTHER	PTHR12814	RNA-BINDING PROTEIN NOB1	104	165	9.5e-27	T	23-07-2021	IPR039907	RNA-binding protein NOB1
Meg19_1012_Bin_504_Helarchaeota	Meg19_1012_Bin_504_scaffold_2392_30_31	18b64fdf731894930e04970b430a61e4	169	PANTHER	PTHR12814	RNA-BINDING PROTEIN NOB1	3	98	9.5e-27	T	23-07-2021	IPR039907	RNA-binding protein NOB1
Meg19_1012_Bin_504_Helarchaeota	Meg19_1012_Bin_504_scaffold_2392_30_31	18b64fdf731894930e04970b430a61e4	169	SUPERFAMILY	SSF88723	PIN domain-like	4	124	1.81e-06	T	23-07-2021	IPR029060	PIN-like domain superfamily
Meg19_1012_Bin_504_Helarchaeota	Meg19_1012_Bin_504_scaffold_2392_30_31	18b64fdf731894930e04970b430a61e4	169	Pfam	PF17146	PIN domain of ribonuclease	7	95	1.7e-17	T	23-07-2021	IPR033411	Ribonuclease, PIN domain
Meg19_1012_Bin_504_Helarchaeota	Meg19_1012_Bin_504_scaffold_2392_30_31	18b64fdf731894930e04970b430a61e4	169	SMART	SM00670	PIN_9	4	113	3.2e-06	T	23-07-2021	IPR002716	PIN domain
Meg19_1012_Bin_504_Helarchaeota	Meg19_1012_Bin_504_scaffold_401_3_121	e4816eae5a16feaf5623daa1c2595354	182	Gene3D	G3DSA:1.10.3210.10	Hypothetical protein af1432	3	180	6e-42	T	23-07-2021	-	-
Meg19_1012_Bin_504_Helarchaeota	Meg19_1012_Bin_504_scaffold_401_3_121	e4816eae5a16feaf5623daa1c2595354	182	PANTHER	PTHR11845	UNCHARACTERIZED	7	174	1.8e-36	T	23-07-2021	IPR039356	5'-deoxynucleotidase YfbR/HDDC2
Meg19_1012_Bin_504_Helarchaeota	Meg19_1012_Bin_504_scaffold_401_3_121	e4816eae5a16feaf5623daa1c2595354	182	Pfam	PF13023	HD domain	14	148	1.5e-24	T	23-07-2021	IPR006674	HD domain
Meg19_1012_Bin_504_Helarchaeota	Meg19_1012_Bin_504_scaffold_401_3_121	e4816eae5a16feaf5623daa1c2595354	182	SUPERFAMILY	SSF109604	HD-domain/PDEase-like	6	159	3.66e-26	T	23-07-2021	-	-
Meg19_1012_Bin_504_Helarchaeota	Meg19_1012_Bin_504_scaffold_401_3_121	e4816eae5a16feaf5623daa1c2595354	182	SMART	SM00471	hd_13	32	144	3.8e-06	T	23-07-2021	IPR003607	HD/PDEase domain
Meg22_1012_Bin_233_Lokiarchaeota	Meg22_1012_Bin_233_scaffold_85_9_58	c19e0a2c14aa8c5a25ace83edf56f2ce	408	Gene3D	G3DSA:1.20.1250.20	MFS general substrate transporter like domains	4	406	2.7e-40	T	23-07-2021	-	-
Meg22_1012_Bin_233_Lokiarchaeota	Meg22_1012_Bin_233_scaffold_85_9_58	c19e0a2c14aa8c5a25ace83edf56f2ce	408	PANTHER	PTHR11360	MONOCARBOXYLATE TRANSPORTER	3	404	3.6e-71	T	23-07-2021	-	-
Meg22_1012_Bin_233_Lokiarchaeota	Meg22_1012_Bin_233_scaffold_85_9_58	c19e0a2c14aa8c5a25ace83edf56f2ce	408	SUPERFAMILY	SSF103473	MFS general substrate transporter	8	407	1.44e-45	T	23-07-2021	IPR036259	MFS transporter superfamily
Meg22_1012_Bin_233_Lokiarchaeota	Meg22_1012_Bin_233_scaffold_85_9_58	c19e0a2c14aa8c5a25ace83edf56f2ce	408	Coils	Coil	Coil	407	408	-	T	23-07-2021	-	-
Meg22_1012_Bin_233_Lokiarchaeota	Meg22_1012_Bin_233_scaffold_85_9_58	c19e0a2c14aa8c5a25ace83edf56f2ce	408	Pfam	PF07690	Major Facilitator Superfamily	25	368	6.9e-25	T	23-07-2021	IPR011701	Major facilitator superfamily
Meg22_1012_Bin_233_Lokiarchaeota	Meg22_1012_Bin_233_scaffold_85_9_58	c19e0a2c14aa8c5a25ace83edf56f2ce	408	PANTHER	PTHR11360:SF268	PERMEASE-RELATED	3	404	3.6e-71	T	23-07-2021	-	-
Meg22_1012_Bin_233_Lokiarchaeota	Meg22_1012_Bin_233_scaffold_85_9_58	c19e0a2c14aa8c5a25ace83edf56f2ce	408	CDD	cd17353	MFS_OFA_like	9	402	1.53864e-88	T	23-07-2021	-	-
Meg22_1012_Bin_233_Lokiarchaeota	Meg22_1012_Bin_233_scaffold_85_9_58	c19e0a2c14aa8c5a25ace83edf56f2ce	408	ProSiteProfiles	PS50850	Major facilitator superfamily (MFS) profile.	9	407	16.971	T	23-07-2021	IPR020846	Major facilitator superfamily domain
Meg22_1214_Bin_191_Lokiarchaeota	Meg22_1214_Bin_191_scaffold_6896_53_2	c19e0a2c14aa8c5a25ace83edf56f2ce	408	Gene3D	G3DSA:1.20.1250.20	MFS general substrate transporter like domains	4	406	2.7e-40	T	23-07-2021	-	-
Meg22_1214_Bin_191_Lokiarchaeota	Meg22_1214_Bin_191_scaffold_6896_53_2	c19e0a2c14aa8c5a25ace83edf56f2ce	408	PANTHER	PTHR11360	MONOCARBOXYLATE TRANSPORTER	3	404	3.6e-71	T	23-07-2021	-	-
Meg22_1214_Bin_191_Lokiarchaeota	Meg22_1214_Bin_191_scaffold_6896_53_2	c19e0a2c14aa8c5a25ace83edf56f2ce	408	SUPERFAMILY	SSF103473	MFS general substrate transporter	8	407	1.44e-45	T	23-07-2021	IPR036259	MFS transporter superfamily
Meg22_1214_Bin_191_Lokiarchaeota	Meg22_1214_Bin_191_scaffold_6896_53_2	c19e0a2c14aa8c5a25ace83edf56f2ce	408	Coils	Coil	Coil	407	408	-	T	23-07-2021	-	-
Meg22_1214_Bin_191_Lokiarchaeota	Meg22_1214_Bin_191_scaffold_6896_53_2	c19e0a2c14aa8c5a25ace83edf56f2ce	408	Pfam	PF07690	Major Facilitator Superfamily	25	368	6.9e-25	T	23-07-2021	IPR011701	Major facilitator superfamily
Meg22_1214_Bin_191_Lokiarchaeota	Meg22_1214_Bin_191_scaffold_6896_53_2	c19e0a2c14aa8c5a25ace83edf56f2ce	408	PANTHER	PTHR11360:SF268	PERMEASE-RELATED	3	404	3.6e-71	T	23-07-2021	-	-
Meg22_1214_Bin_191_Lokiarchaeota	Meg22_1214_Bin_191_scaffold_6896_53_2	c19e0a2c14aa8c5a25ace83edf56f2ce	408	CDD	cd17353	MFS_OFA_like	9	402	1.53864e-88	T	23-07-2021	-	-
Meg22_1214_Bin_191_Lokiarchaeota	Meg22_1214_Bin_191_scaffold_6896_53_2	c19e0a2c14aa8c5a25ace83edf56f2ce	408	ProSiteProfiles	PS50850	Major facilitator superfamily (MFS) profile.	9	407	16.971	T	23-07-2021	IPR020846	Major facilitator superfamily domain
Meg22_1416_Bin_151_Lokiarchaeota	Meg22_1416_Bin_151_scaffold_345_9_23	c19e0a2c14aa8c5a25ace83edf56f2ce	408	Gene3D	G3DSA:1.20.1250.20	MFS general substrate transporter like domains	4	406	2.7e-40	T	23-07-2021	-	-
Meg22_1416_Bin_151_Lokiarchaeota	Meg22_1416_Bin_151_scaffold_345_9_23	c19e0a2c14aa8c5a25ace83edf56f2ce	408	PANTHER	PTHR11360	MONOCARBOXYLATE TRANSPORTER	3	404	3.6e-71	T	23-07-2021	-	-
Meg22_1416_Bin_151_Lokiarchaeota	Meg22_1416_Bin_151_scaffold_345_9_23	c19e0a2c14aa8c5a25ace83edf56f2ce	408	SUPERFAMILY	SSF103473	MFS general substrate transporter	8	407	1.44e-45	T	23-07-2021	IPR036259	MFS transporter superfamily
Meg22_1416_Bin_151_Lokiarchaeota	Meg22_1416_Bin_151_scaffold_345_9_23	c19e0a2c14aa8c5a25ace83edf56f2ce	408	Coils	Coil	Coil	407	408	-	T	23-07-2021	-	-
Meg22_1416_Bin_151_Lokiarchaeota	Meg22_1416_Bin_151_scaffold_345_9_23	c19e0a2c14aa8c5a25ace83edf56f2ce	408	Pfam	PF07690	Major Facilitator Superfamily	25	368	6.9e-25	T	23-07-2021	IPR011701	Major facilitator superfamily
Meg22_1416_Bin_151_Lokiarchaeota	Meg22_1416_Bin_151_scaffold_345_9_23	c19e0a2c14aa8c5a25ace83edf56f2ce	408	PANTHER	PTHR11360:SF268	PERMEASE-RELATED	3	404	3.6e-71	T	23-07-2021	-	-
Meg22_1416_Bin_151_Lokiarchaeota	Meg22_1416_Bin_151_scaffold_345_9_23	c19e0a2c14aa8c5a25ace83edf56f2ce	408	CDD	cd17353	MFS_OFA_like	9	402	1.53864e-88	T	23-07-2021	-	-
Meg22_1416_Bin_151_Lokiarchaeota	Meg22_1416_Bin_151_scaffold_345_9_23	c19e0a2c14aa8c5a25ace83edf56f2ce	408	ProSiteProfiles	PS50850	Major facilitator superfamily (MFS) profile.	9	407	16.971	T	23-07-2021	IPR020846	Major facilitator superfamily domain
Meg22_1214_Bin_191_Lokiarchaeota	Meg22_1214_Bin_191_scaffold_2698_31_23	64a20dcd9a0ba6c85d2dfa906acb00e3	402	TIGRFAM	TIGR02032	GG-red-SF: geranylgeranyl reductase family	8	290	8e-49	T	23-07-2021	IPR011777	Geranylgeranyl reductase family
Meg22_1214_Bin_191_Lokiarchaeota	Meg22_1214_Bin_191_scaffold_2698_31_23	64a20dcd9a0ba6c85d2dfa906acb00e3	402	PANTHER	PTHR42685:SF18	DIGERANYLGERANYLGLYCEROPHOSPHOLIPID REDUCTASE	6	387	8e-56	T	23-07-2021	-	-
Meg22_1214_Bin_191_Lokiarchaeota	Meg22_1214_Bin_191_scaffold_2698_31_23	64a20dcd9a0ba6c85d2dfa906acb00e3	402	SUPERFAMILY	SSF51905	FAD/NAD(P)-binding domain	5	372	3.56e-31	T	23-07-2021	IPR036188	FAD/NAD(P)-binding domain superfamily
Meg22_1214_Bin_191_Lokiarchaeota	Meg22_1214_Bin_191_scaffold_2698_31_23	64a20dcd9a0ba6c85d2dfa906acb00e3	402	Gene3D	G3DSA:3.50.50.60	-	3	401	4.7e-61	T	23-07-2021	IPR036188	FAD/NAD(P)-binding domain superfamily
Meg22_1214_Bin_191_Lokiarchaeota	Meg22_1214_Bin_191_scaffold_2698_31_23	64a20dcd9a0ba6c85d2dfa906acb00e3	402	PANTHER	PTHR42685	GERANYLGERANYL DIPHOSPHATE REDUCTASE	6	387	8e-56	T	23-07-2021	-	-
Meg22_1214_Bin_191_Lokiarchaeota	Meg22_1214_Bin_191_scaffold_2698_31_23	64a20dcd9a0ba6c85d2dfa906acb00e3	402	PRINTS	PR00420	Aromatic-ring hydroxylase (flavoprotein monooxygenase) signature	8	30	5.7e-07	T	23-07-2021	-	-
Meg22_1214_Bin_191_Lokiarchaeota	Meg22_1214_Bin_191_scaffold_2698_31_23	64a20dcd9a0ba6c85d2dfa906acb00e3	402	PRINTS	PR00420	Aromatic-ring hydroxylase (flavoprotein monooxygenase) signature	255	270	5.7e-07	T	23-07-2021	-	-
Meg22_1214_Bin_191_Lokiarchaeota	Meg22_1214_Bin_191_scaffold_2698_31_23	64a20dcd9a0ba6c85d2dfa906acb00e3	402	PRINTS	PR00420	Aromatic-ring hydroxylase (flavoprotein monooxygenase) signature	145	160	5.7e-07	T	23-07-2021	-	-
Meg22_1214_Bin_191_Lokiarchaeota	Meg22_1214_Bin_191_scaffold_2698_31_23	64a20dcd9a0ba6c85d2dfa906acb00e3	402	Pfam	PF01494	FAD binding domain	7	167	6.1e-08	T	23-07-2021	IPR002938	FAD-binding domain
Meg19_1012_Bin_504_Helarchaeota	Meg19_1012_Bin_504_scaffold_367_1_69	188e2845464be07773f0ae1fac9b3647	165	SUPERFAMILY	SSF55129	Ribosomal protein L30p/L7e	14	165	6.02e-45	T	23-07-2021	IPR036919	Ribosomal protein L30, ferredoxin-like fold domain superfamily
Meg19_1012_Bin_504_Helarchaeota	Meg19_1012_Bin_504_scaffold_367_1_69	188e2845464be07773f0ae1fac9b3647	165	Gene3D	G3DSA:3.30.1390.20	-	14	153	7.8e-53	T	23-07-2021	IPR036919	Ribosomal protein L30, ferredoxin-like fold domain superfamily
Meg19_1012_Bin_504_Helarchaeota	Meg19_1012_Bin_504_scaffold_367_1_69	188e2845464be07773f0ae1fac9b3647	165	CDD	cd01657	Ribosomal_L7_archeal_euk	13	165	8.14703e-57	T	23-07-2021	IPR035808	Ribosomal protein L7, eukaryotic/archaeal
Meg19_1012_Bin_504_Helarchaeota	Meg19_1012_Bin_504_scaffold_367_1_69	188e2845464be07773f0ae1fac9b3647	165	PANTHER	PTHR11524:SF16	60S RIBOSOMAL PROTEIN L7-RELATED	12	164	1.5e-29	T	23-07-2021	-	-
Meg19_1012_Bin_504_Helarchaeota	Meg19_1012_Bin_504_scaffold_367_1_69	188e2845464be07773f0ae1fac9b3647	165	Pfam	PF00327	Ribosomal protein L30p/L7e	13	63	7.5e-14	T	23-07-2021	IPR016082	Ribosomal protein L30, ferredoxin-like fold domain
Meg19_1012_Bin_504_Helarchaeota	Meg19_1012_Bin_504_scaffold_367_1_69	188e2845464be07773f0ae1fac9b3647	165	Hamap	MF_01371_A	50S ribosomal protein L30 [rpmD].	1	165	70.4181	T	23-07-2021	IPR005997	Ribosomal protein L30, archaeal
Meg19_1012_Bin_504_Helarchaeota	Meg19_1012_Bin_504_scaffold_367_1_69	188e2845464be07773f0ae1fac9b3647	165	TIGRFAM	TIGR01309	uL30_arch: ribosomal protein uL30	13	165	2.1e-55	T	23-07-2021	IPR005997	Ribosomal protein L30, archaeal
Meg19_1012_Bin_504_Helarchaeota	Meg19_1012_Bin_504_scaffold_367_1_69	188e2845464be07773f0ae1fac9b3647	165	PANTHER	PTHR11524	60S RIBOSOMAL PROTEIN L7	12	164	1.5e-29	T	23-07-2021	IPR039699	Ribosomal protein L7/L30
Meg19_1012_Bin_504_Helarchaeota	Meg19_1012_Bin_504_scaffold_367_1_69	188e2845464be07773f0ae1fac9b3647	165	Gene3D	G3DSA:1.10.15.30	-	69	124	7.8e-53	T	23-07-2021	IPR023106	Ribosomal protein L30, central domain, archaeal type
Meg22_1416_Bin_151_Lokiarchaeota	Meg22_1416_Bin_151_scaffold_392_10_54	e1f89347a1a6e12d33872383a3cc860d	260	Coils	Coil	Coil	2	29	-	T	23-07-2021	-	-
Meg22_1416_Bin_151_Lokiarchaeota	Meg22_1416_Bin_151_scaffold_392_10_54	e1f89347a1a6e12d33872383a3cc860d	260	Pfam	PF00731	AIR carboxylase	128	254	2.8e-18	T	23-07-2021	IPR000031	PurE domain
Meg22_1416_Bin_151_Lokiarchaeota	Meg22_1416_Bin_151_scaffold_392_10_54	e1f89347a1a6e12d33872383a3cc860d	260	SUPERFAMILY	SSF52255	N5-CAIR mutase (phosphoribosylaminoimidazole carboxylase, PurE)	126	257	5.36e-31	T	23-07-2021	IPR035893	PurE domain superfamily
Meg22_1416_Bin_151_Lokiarchaeota	Meg22_1416_Bin_151_scaffold_392_10_54	e1f89347a1a6e12d33872383a3cc860d	260	SMART	SM01001	AIRC_2	126	260	9e-43	T	23-07-2021	IPR000031	PurE domain
Meg22_1416_Bin_151_Lokiarchaeota	Meg22_1416_Bin_151_scaffold_392_10_54	e1f89347a1a6e12d33872383a3cc860d	260	Gene3D	G3DSA:3.40.50.7700	-	127	259	7.2e-34	T	23-07-2021	IPR035893	PurE domain superfamily
Meg22_1416_Bin_151_Lokiarchaeota	Meg22_1416_Bin_151_scaffold_392_10_54	e1f89347a1a6e12d33872383a3cc860d	260	PANTHER	PTHR43064	PHOSPHORIBOSYLAMINOIMIDAZOLE CARBOXYLASE-RELATED	5	258	1.7e-85	T	23-07-2021	IPR039476	Pyridinium-3,5-biscarboxylic acid mononucleotide synthase
Meg22_1012_Bin_233_Lokiarchaeota	Meg22_1012_Bin_233_scaffold_9_3_78	e1f89347a1a6e12d33872383a3cc860d	260	Coils	Coil	Coil	2	29	-	T	23-07-2021	-	-
Meg22_1012_Bin_233_Lokiarchaeota	Meg22_1012_Bin_233_scaffold_9_3_78	e1f89347a1a6e12d33872383a3cc860d	260	Pfam	PF00731	AIR carboxylase	128	254	2.8e-18	T	23-07-2021	IPR000031	PurE domain
Meg22_1012_Bin_233_Lokiarchaeota	Meg22_1012_Bin_233_scaffold_9_3_78	e1f89347a1a6e12d33872383a3cc860d	260	SUPERFAMILY	SSF52255	N5-CAIR mutase (phosphoribosylaminoimidazole carboxylase, PurE)	126	257	5.36e-31	T	23-07-2021	IPR035893	PurE domain superfamily
Meg22_1012_Bin_233_Lokiarchaeota	Meg22_1012_Bin_233_scaffold_9_3_78	e1f89347a1a6e12d33872383a3cc860d	260	SMART	SM01001	AIRC_2	126	260	9e-43	T	23-07-2021	IPR000031	PurE domain
Meg22_1012_Bin_233_Lokiarchaeota	Meg22_1012_Bin_233_scaffold_9_3_78	e1f89347a1a6e12d33872383a3cc860d	260	Gene3D	G3DSA:3.40.50.7700	-	127	259	7.2e-34	T	23-07-2021	IPR035893	PurE domain superfamily
Meg22_1012_Bin_233_Lokiarchaeota	Meg22_1012_Bin_233_scaffold_9_3_78	e1f89347a1a6e12d33872383a3cc860d	260	PANTHER	PTHR43064	PHOSPHORIBOSYLAMINOIMIDAZOLE CARBOXYLASE-RELATED	5	258	1.7e-85	T	23-07-2021	IPR039476	Pyridinium-3,5-biscarboxylic acid mononucleotide synthase
Meg22_1214_Bin_191_Lokiarchaeota	Meg22_1214_Bin_191_scaffold_2470_30_22	e1f89347a1a6e12d33872383a3cc860d	260	Coils	Coil	Coil	2	29	-	T	23-07-2021	-	-
Meg22_1214_Bin_191_Lokiarchaeota	Meg22_1214_Bin_191_scaffold_2470_30_22	e1f89347a1a6e12d33872383a3cc860d	260	Pfam	PF00731	AIR carboxylase	128	254	2.8e-18	T	23-07-2021	IPR000031	PurE domain
Meg22_1214_Bin_191_Lokiarchaeota	Meg22_1214_Bin_191_scaffold_2470_30_22	e1f89347a1a6e12d33872383a3cc860d	260	SUPERFAMILY	SSF52255	N5-CAIR mutase (phosphoribosylaminoimidazole carboxylase, PurE)	126	257	5.36e-31	T	23-07-2021	IPR035893	PurE domain superfamily
Meg22_1214_Bin_191_Lokiarchaeota	Meg22_1214_Bin_191_scaffold_2470_30_22	e1f89347a1a6e12d33872383a3cc860d	260	SMART	SM01001	AIRC_2	126	260	9e-43	T	23-07-2021	IPR000031	PurE domain
Meg22_1214_Bin_191_Lokiarchaeota	Meg22_1214_Bin_191_scaffold_2470_30_22	e1f89347a1a6e12d33872383a3cc860d	260	Gene3D	G3DSA:3.40.50.7700	-	127	259	7.2e-34	T	23-07-2021	IPR035893	PurE domain superfamily
Meg22_1214_Bin_191_Lokiarchaeota	Meg22_1214_Bin_191_scaffold_2470_30_22	e1f89347a1a6e12d33872383a3cc860d	260	PANTHER	PTHR43064	PHOSPHORIBOSYLAMINOIMIDAZOLE CARBOXYLASE-RELATED	5	258	1.7e-85	T	23-07-2021	IPR039476	Pyridinium-3,5-biscarboxylic acid mononucleotide synthase
Meg22_1214_Bin_191_Lokiarchaeota	Meg22_1214_Bin_191_scaffold_1587_22_7	589ea362f1b546706aad2fcff80ef569	435	SUPERFAMILY	SSF53743	FucI/AraA N-terminal and middle domains	20	295	1.44e-36	T	23-07-2021	IPR009015	L-fucose isomerase, N-terminal/central domain superfamily
Meg22_1214_Bin_191_Lokiarchaeota	Meg22_1214_Bin_191_scaffold_1587_22_7	589ea362f1b546706aad2fcff80ef569	435	PANTHER	PTHR36120	-	28	435	3e-44	T	23-07-2021	-	-
Meg22_1214_Bin_191_Lokiarchaeota	Meg22_1214_Bin_191_scaffold_1587_22_7	589ea362f1b546706aad2fcff80ef569	435	SUPERFAMILY	SSF50443	FucI/AraA C-terminal domain-like	304	434	4.45e-08	T	23-07-2021	IPR004216	L-fucose/L-arabinose isomerase, C-terminal
Meg22_1012_Bin_233_Lokiarchaeota	Meg22_1012_Bin_233_scaffold_89_10_39	589ea362f1b546706aad2fcff80ef569	435	SUPERFAMILY	SSF53743	FucI/AraA N-terminal and middle domains	20	295	1.44e-36	T	23-07-2021	IPR009015	L-fucose isomerase, N-terminal/central domain superfamily
Meg22_1012_Bin_233_Lokiarchaeota	Meg22_1012_Bin_233_scaffold_89_10_39	589ea362f1b546706aad2fcff80ef569	435	PANTHER	PTHR36120	-	28	435	3e-44	T	23-07-2021	-	-
Meg22_1012_Bin_233_Lokiarchaeota	Meg22_1012_Bin_233_scaffold_89_10_39	589ea362f1b546706aad2fcff80ef569	435	SUPERFAMILY	SSF50443	FucI/AraA C-terminal domain-like	304	434	4.45e-08	T	23-07-2021	IPR004216	L-fucose/L-arabinose isomerase, C-terminal
Meg22_1416_Bin_151_Lokiarchaeota	Meg22_1416_Bin_151_scaffold_46444_145_3	589ea362f1b546706aad2fcff80ef569	435	SUPERFAMILY	SSF53743	FucI/AraA N-terminal and middle domains	20	295	1.44e-36	T	23-07-2021	IPR009015	L-fucose isomerase, N-terminal/central domain superfamily
Meg22_1416_Bin_151_Lokiarchaeota	Meg22_1416_Bin_151_scaffold_46444_145_3	589ea362f1b546706aad2fcff80ef569	435	PANTHER	PTHR36120	-	28	435	3e-44	T	23-07-2021	-	-
Meg22_1416_Bin_151_Lokiarchaeota	Meg22_1416_Bin_151_scaffold_46444_145_3	589ea362f1b546706aad2fcff80ef569	435	SUPERFAMILY	SSF50443	FucI/AraA C-terminal domain-like	304	434	4.45e-08	T	23-07-2021	IPR004216	L-fucose/L-arabinose isomerase, C-terminal
Meg19_1012_Bin_504_Helarchaeota	Meg19_1012_Bin_504_scaffold_1003_12_83	aa66ba956402b4eb652d3cd84397577c	98	Hamap	MF_00261	DNA-directed RNA polymerase subunit L [rpoL].	2	88	17.5122	T	23-07-2021	IPR022905	DNA-directed RNA polymerase subunit L (Rpo11)
Meg19_1012_Bin_504_Helarchaeota	Meg19_1012_Bin_504_scaffold_1003_12_83	aa66ba956402b4eb652d3cd84397577c	98	CDD	cd06927	RNAP_L	3	86	7.6996e-25	T	23-07-2021	-	-
Meg19_1012_Bin_504_Helarchaeota	Meg19_1012_Bin_504_scaffold_1003_12_83	aa66ba956402b4eb652d3cd84397577c	98	Gene3D	G3DSA:3.30.1360.10	-	1	98	3e-25	T	23-07-2021	IPR036603	RNA polymerase, RBP11-like subunit
Meg19_1012_Bin_504_Helarchaeota	Meg19_1012_Bin_504_scaffold_1003_12_83	aa66ba956402b4eb652d3cd84397577c	98	Pfam	PF13656	RNA polymerase Rpb3/Rpb11 dimerisation domain	14	86	8.3e-22	T	23-07-2021	IPR009025	DNA-directed RNA polymerase, RBP11-like dimerisation domain
Meg19_1012_Bin_504_Helarchaeota	Meg19_1012_Bin_504_scaffold_1003_12_83	aa66ba956402b4eb652d3cd84397577c	98	SUPERFAMILY	SSF55257	RBP11-like subunits of RNA polymerase	6	94	2.51e-25	T	23-07-2021	IPR036603	RNA polymerase, RBP11-like subunit
Meg19_1012_Bin_504_Helarchaeota	Meg19_1012_Bin_504_scaffold_1003_12_83	aa66ba956402b4eb652d3cd84397577c	98	Coils	Coil	Coil	67	94	-	T	23-07-2021	-	-
Meg19_1012_Bin_504_Helarchaeota	Meg19_1012_Bin_504_scaffold_1003_12_83	aa66ba956402b4eb652d3cd84397577c	98	PANTHER	PTHR13946	DNA-DIRECTED RNA POLYMERASE I,II,III	14	95	5.8e-16	T	23-07-2021	-	-
Meg22_1416_Bin_151_Lokiarchaeota	Meg22_1416_Bin_151_scaffold_392_10_28	db8b84cabea358ae8d90a4ab8bcf80d8	290	Pfam	PF08902	Domain of unknown function (DUF1848)	12	285	1.6e-70	T	23-07-2021	IPR014998	Protein of unknown function DUF1848
Meg22_1214_Bin_191_Lokiarchaeota	Meg22_1214_Bin_191_scaffold_14035_78_10	7208c709cfc5859a0c7bfacdf30eac92	403	Pfam	PF04389	Peptidase family M28	231	365	1.3e-07	T	23-07-2021	IPR007484	Peptidase M28
Meg22_1214_Bin_191_Lokiarchaeota	Meg22_1214_Bin_191_scaffold_14035_78_10	7208c709cfc5859a0c7bfacdf30eac92	403	SUPERFAMILY	SSF53187	Zn-dependent exopeptidases	13	364	7.86e-15	T	23-07-2021	-	-
Meg22_1012_Bin_233_Lokiarchaeota	Meg22_1012_Bin_233_scaffold_1145_27_8	2c7c4b1a4c8e1d097f7baa0fc6ec20de	456	PANTHER	PTHR10353	GLYCOSYL HYDROLASE	6	453	1.9e-142	T	23-07-2021	IPR001360	Glycoside hydrolase family 1
Meg22_1012_Bin_233_Lokiarchaeota	Meg22_1012_Bin_233_scaffold_1145_27_8	2c7c4b1a4c8e1d097f7baa0fc6ec20de	456	TIGRFAM	TIGR03356	BGL: beta-galactosidase	6	444	2e-162	T	23-07-2021	IPR017736	Glycoside hydrolase, family 1, beta-glucosidase
Meg22_1012_Bin_233_Lokiarchaeota	Meg22_1012_Bin_233_scaffold_1145_27_8	2c7c4b1a4c8e1d097f7baa0fc6ec20de	456	Pfam	PF00232	Glycosyl hydrolase family 1	5	453	6.2e-168	T	23-07-2021	IPR001360	Glycoside hydrolase family 1
Meg22_1012_Bin_233_Lokiarchaeota	Meg22_1012_Bin_233_scaffold_1145_27_8	2c7c4b1a4c8e1d097f7baa0fc6ec20de	456	ProSitePatterns	PS00572	Glycosyl hydrolases family 1 active site.	356	364	-	T	23-07-2021	IPR018120	Glycoside hydrolase family 1, active site
Meg22_1012_Bin_233_Lokiarchaeota	Meg22_1012_Bin_233_scaffold_1145_27_8	2c7c4b1a4c8e1d097f7baa0fc6ec20de	456	Gene3D	G3DSA:3.20.20.80	Glycosidases	1	455	2.6e-175	T	23-07-2021	-	-
Meg22_1012_Bin_233_Lokiarchaeota	Meg22_1012_Bin_233_scaffold_1145_27_8	2c7c4b1a4c8e1d097f7baa0fc6ec20de	456	PANTHER	PTHR10353:SF36	CYTOSOLIC BETA-GLUCOSIDASE	6	453	1.9e-142	T	23-07-2021	-	-
Meg22_1012_Bin_233_Lokiarchaeota	Meg22_1012_Bin_233_scaffold_1145_27_8	2c7c4b1a4c8e1d097f7baa0fc6ec20de	456	PRINTS	PR00131	Glycosyl hydrolase family 1 signature	422	434	4e-20	T	23-07-2021	IPR001360	Glycoside hydrolase family 1
Meg22_1012_Bin_233_Lokiarchaeota	Meg22_1012_Bin_233_scaffold_1145_27_8	2c7c4b1a4c8e1d097f7baa0fc6ec20de	456	PRINTS	PR00131	Glycosyl hydrolase family 1 signature	398	415	4e-20	T	23-07-2021	IPR001360	Glycoside hydrolase family 1
Meg22_1012_Bin_233_Lokiarchaeota	Meg22_1012_Bin_233_scaffold_1145_27_8	2c7c4b1a4c8e1d097f7baa0fc6ec20de	456	PRINTS	PR00131	Glycosyl hydrolase family 1 signature	377	388	4e-20	T	23-07-2021	IPR001360	Glycoside hydrolase family 1
Meg22_1012_Bin_233_Lokiarchaeota	Meg22_1012_Bin_233_scaffold_1145_27_8	2c7c4b1a4c8e1d097f7baa0fc6ec20de	456	PRINTS	PR00131	Glycosyl hydrolase family 1 signature	288	302	4e-20	T	23-07-2021	IPR001360	Glycoside hydrolase family 1
Meg22_1012_Bin_233_Lokiarchaeota	Meg22_1012_Bin_233_scaffold_1145_27_8	2c7c4b1a4c8e1d097f7baa0fc6ec20de	456	PRINTS	PR00131	Glycosyl hydrolase family 1 signature	356	364	4e-20	T	23-07-2021	IPR001360	Glycoside hydrolase family 1
Meg22_1012_Bin_233_Lokiarchaeota	Meg22_1012_Bin_233_scaffold_1145_27_8	2c7c4b1a4c8e1d097f7baa0fc6ec20de	456	ProSitePatterns	PS00653	Glycosyl hydrolases family 1 N-terminal signature.	10	24	-	T	23-07-2021	IPR033132	Glycosyl hydrolases family 1, N-terminal conserved site
Meg22_1012_Bin_233_Lokiarchaeota	Meg22_1012_Bin_233_scaffold_1145_27_8	2c7c4b1a4c8e1d097f7baa0fc6ec20de	456	SUPERFAMILY	SSF51445	(Trans)glycosidases	3	449	7.66e-164	T	23-07-2021	IPR017853	Glycoside hydrolase superfamily
Meg22_1012_Bin_233_Lokiarchaeota	Meg22_1012_Bin_233_scaffold_1145_27_8	2c7c4b1a4c8e1d097f7baa0fc6ec20de	456	Coils	Coil	Coil	455	456	-	T	23-07-2021	-	-
Meg22_1214_Bin_191_Lokiarchaeota	Meg22_1214_Bin_191_scaffold_1524_21_8	2c7c4b1a4c8e1d097f7baa0fc6ec20de	456	PANTHER	PTHR10353	GLYCOSYL HYDROLASE	6	453	1.9e-142	T	23-07-2021	IPR001360	Glycoside hydrolase family 1
Meg22_1214_Bin_191_Lokiarchaeota	Meg22_1214_Bin_191_scaffold_1524_21_8	2c7c4b1a4c8e1d097f7baa0fc6ec20de	456	TIGRFAM	TIGR03356	BGL: beta-galactosidase	6	444	2e-162	T	23-07-2021	IPR017736	Glycoside hydrolase, family 1, beta-glucosidase
Meg22_1214_Bin_191_Lokiarchaeota	Meg22_1214_Bin_191_scaffold_1524_21_8	2c7c4b1a4c8e1d097f7baa0fc6ec20de	456	Pfam	PF00232	Glycosyl hydrolase family 1	5	453	6.2e-168	T	23-07-2021	IPR001360	Glycoside hydrolase family 1
Meg22_1214_Bin_191_Lokiarchaeota	Meg22_1214_Bin_191_scaffold_1524_21_8	2c7c4b1a4c8e1d097f7baa0fc6ec20de	456	ProSitePatterns	PS00572	Glycosyl hydrolases family 1 active site.	356	364	-	T	23-07-2021	IPR018120	Glycoside hydrolase family 1, active site
Meg22_1214_Bin_191_Lokiarchaeota	Meg22_1214_Bin_191_scaffold_1524_21_8	2c7c4b1a4c8e1d097f7baa0fc6ec20de	456	Gene3D	G3DSA:3.20.20.80	Glycosidases	1	455	2.6e-175	T	23-07-2021	-	-
Meg22_1214_Bin_191_Lokiarchaeota	Meg22_1214_Bin_191_scaffold_1524_21_8	2c7c4b1a4c8e1d097f7baa0fc6ec20de	456	PANTHER	PTHR10353:SF36	CYTOSOLIC BETA-GLUCOSIDASE	6	453	1.9e-142	T	23-07-2021	-	-
Meg22_1214_Bin_191_Lokiarchaeota	Meg22_1214_Bin_191_scaffold_1524_21_8	2c7c4b1a4c8e1d097f7baa0fc6ec20de	456	PRINTS	PR00131	Glycosyl hydrolase family 1 signature	422	434	4e-20	T	23-07-2021	IPR001360	Glycoside hydrolase family 1
Meg22_1214_Bin_191_Lokiarchaeota	Meg22_1214_Bin_191_scaffold_1524_21_8	2c7c4b1a4c8e1d097f7baa0fc6ec20de	456	PRINTS	PR00131	Glycosyl hydrolase family 1 signature	398	415	4e-20	T	23-07-2021	IPR001360	Glycoside hydrolase family 1
Meg22_1214_Bin_191_Lokiarchaeota	Meg22_1214_Bin_191_scaffold_1524_21_8	2c7c4b1a4c8e1d097f7baa0fc6ec20de	456	PRINTS	PR00131	Glycosyl hydrolase family 1 signature	377	388	4e-20	T	23-07-2021	IPR001360	Glycoside hydrolase family 1
Meg22_1214_Bin_191_Lokiarchaeota	Meg22_1214_Bin_191_scaffold_1524_21_8	2c7c4b1a4c8e1d097f7baa0fc6ec20de	456	PRINTS	PR00131	Glycosyl hydrolase family 1 signature	288	302	4e-20	T	23-07-2021	IPR001360	Glycoside hydrolase family 1
Meg22_1214_Bin_191_Lokiarchaeota	Meg22_1214_Bin_191_scaffold_1524_21_8	2c7c4b1a4c8e1d097f7baa0fc6ec20de	456	PRINTS	PR00131	Glycosyl hydrolase family 1 signature	356	364	4e-20	T	23-07-2021	IPR001360	Glycoside hydrolase family 1
Meg22_1214_Bin_191_Lokiarchaeota	Meg22_1214_Bin_191_scaffold_1524_21_8	2c7c4b1a4c8e1d097f7baa0fc6ec20de	456	ProSitePatterns	PS00653	Glycosyl hydrolases family 1 N-terminal signature.	10	24	-	T	23-07-2021	IPR033132	Glycosyl hydrolases family 1, N-terminal conserved site
Meg22_1214_Bin_191_Lokiarchaeota	Meg22_1214_Bin_191_scaffold_1524_21_8	2c7c4b1a4c8e1d097f7baa0fc6ec20de	456	SUPERFAMILY	SSF51445	(Trans)glycosidases	3	449	7.66e-164	T	23-07-2021	IPR017853	Glycoside hydrolase superfamily
Meg22_1214_Bin_191_Lokiarchaeota	Meg22_1214_Bin_191_scaffold_1524_21_8	2c7c4b1a4c8e1d097f7baa0fc6ec20de	456	Coils	Coil	Coil	455	456	-	T	23-07-2021	-	-
Meg22_1012_Bin_233_Lokiarchaeota	Meg22_1012_Bin_233_scaffold_15143_61_12	b530fedffc067938104f57eb848897db	276	PANTHER	PTHR43423	ABC TRANSPORTER I FAMILY MEMBER 17	21	276	6.7e-108	T	23-07-2021	IPR005670	Phosphate transport system permease protein 1
Meg22_1012_Bin_233_Lokiarchaeota	Meg22_1012_Bin_233_scaffold_15143_61_12	b530fedffc067938104f57eb848897db	276	CDD	cd03260	ABC_PstB_phosphate_transporter	30	258	7.45967e-147	T	23-07-2021	IPR005670	Phosphate transport system permease protein 1
Meg22_1012_Bin_233_Lokiarchaeota	Meg22_1012_Bin_233_scaffold_15143_61_12	b530fedffc067938104f57eb848897db	276	ProSiteProfiles	PS51238	Phosphate import ATP-binding protein pstB family profile.	230	276	20.798	T	23-07-2021	IPR015850	ABC transporter, phosphate import, PstB
Meg22_1012_Bin_233_Lokiarchaeota	Meg22_1012_Bin_233_scaffold_15143_61_12	b530fedffc067938104f57eb848897db	276	TIGRFAM	TIGR00972	3a0107s01c2: phosphate ABC transporter, ATP-binding protein	30	276	3.2e-124	T	23-07-2021	IPR005670	Phosphate transport system permease protein 1
Meg22_1012_Bin_233_Lokiarchaeota	Meg22_1012_Bin_233_scaffold_15143_61_12	b530fedffc067938104f57eb848897db	276	ProSitePatterns	PS00211	ABC transporters family signature.	173	187	-	T	23-07-2021	IPR017871	ABC transporter, conserved site
Meg22_1012_Bin_233_Lokiarchaeota	Meg22_1012_Bin_233_scaffold_15143_61_12	b530fedffc067938104f57eb848897db	276	ProSiteProfiles	PS50893	ATP-binding cassette, ABC transporter-type domain profile.	30	271	22.763	T	23-07-2021	IPR003439	ABC transporter-like
Meg22_1012_Bin_233_Lokiarchaeota	Meg22_1012_Bin_233_scaffold_15143_61_12	b530fedffc067938104f57eb848897db	276	SUPERFAMILY	SSF52540	P-loop containing nucleoside triphosphate hydrolases	25	263	2.25e-60	T	23-07-2021	IPR027417	P-loop containing nucleoside triphosphate hydrolase
Meg22_1012_Bin_233_Lokiarchaeota	Meg22_1012_Bin_233_scaffold_15143_61_12	b530fedffc067938104f57eb848897db	276	PANTHER	PTHR43423:SF12	IRON EXPORT ATP-BINDING PROTEIN FETA-RELATED	21	276	6.7e-108	T	23-07-2021	-	-
Meg22_1012_Bin_233_Lokiarchaeota	Meg22_1012_Bin_233_scaffold_15143_61_12	b530fedffc067938104f57eb848897db	276	Gene3D	G3DSA:3.40.50.300	-	27	274	3.5e-63	T	23-07-2021	-	-
Meg22_1012_Bin_233_Lokiarchaeota	Meg22_1012_Bin_233_scaffold_15143_61_12	b530fedffc067938104f57eb848897db	276	Pfam	PF00005	ABC transporter	47	201	5.1e-30	T	23-07-2021	IPR003439	ABC transporter-like
Meg22_1012_Bin_233_Lokiarchaeota	Meg22_1012_Bin_233_scaffold_15143_61_12	b530fedffc067938104f57eb848897db	276	SMART	SM00382	AAA_5	54	263	4.6e-11	T	23-07-2021	IPR003593	AAA+ ATPase domain
Meg22_1416_Bin_151_Lokiarchaeota	Meg22_1416_Bin_151_scaffold_27477_120_5	b530fedffc067938104f57eb848897db	276	PANTHER	PTHR43423	ABC TRANSPORTER I FAMILY MEMBER 17	21	276	6.7e-108	T	23-07-2021	IPR005670	Phosphate transport system permease protein 1
Meg22_1416_Bin_151_Lokiarchaeota	Meg22_1416_Bin_151_scaffold_27477_120_5	b530fedffc067938104f57eb848897db	276	CDD	cd03260	ABC_PstB_phosphate_transporter	30	258	7.45967e-147	T	23-07-2021	IPR005670	Phosphate transport system permease protein 1
Meg22_1416_Bin_151_Lokiarchaeota	Meg22_1416_Bin_151_scaffold_27477_120_5	b530fedffc067938104f57eb848897db	276	ProSiteProfiles	PS51238	Phosphate import ATP-binding protein pstB family profile.	230	276	20.798	T	23-07-2021	IPR015850	ABC transporter, phosphate import, PstB
Meg22_1416_Bin_151_Lokiarchaeota	Meg22_1416_Bin_151_scaffold_27477_120_5	b530fedffc067938104f57eb848897db	276	TIGRFAM	TIGR00972	3a0107s01c2: phosphate ABC transporter, ATP-binding protein	30	276	3.2e-124	T	23-07-2021	IPR005670	Phosphate transport system permease protein 1
Meg22_1416_Bin_151_Lokiarchaeota	Meg22_1416_Bin_151_scaffold_27477_120_5	b530fedffc067938104f57eb848897db	276	ProSitePatterns	PS00211	ABC transporters family signature.	173	187	-	T	23-07-2021	IPR017871	ABC transporter, conserved site
Meg22_1416_Bin_151_Lokiarchaeota	Meg22_1416_Bin_151_scaffold_27477_120_5	b530fedffc067938104f57eb848897db	276	ProSiteProfiles	PS50893	ATP-binding cassette, ABC transporter-type domain profile.	30	271	22.763	T	23-07-2021	IPR003439	ABC transporter-like
Meg22_1416_Bin_151_Lokiarchaeota	Meg22_1416_Bin_151_scaffold_27477_120_5	b530fedffc067938104f57eb848897db	276	SUPERFAMILY	SSF52540	P-loop containing nucleoside triphosphate hydrolases	25	263	2.25e-60	T	23-07-2021	IPR027417	P-loop containing nucleoside triphosphate hydrolase
Meg22_1416_Bin_151_Lokiarchaeota	Meg22_1416_Bin_151_scaffold_27477_120_5	b530fedffc067938104f57eb848897db	276	PANTHER	PTHR43423:SF12	IRON EXPORT ATP-BINDING PROTEIN FETA-RELATED	21	276	6.7e-108	T	23-07-2021	-	-
Meg22_1416_Bin_151_Lokiarchaeota	Meg22_1416_Bin_151_scaffold_27477_120_5	b530fedffc067938104f57eb848897db	276	Gene3D	G3DSA:3.40.50.300	-	27	274	3.5e-63	T	23-07-2021	-	-
Meg22_1416_Bin_151_Lokiarchaeota	Meg22_1416_Bin_151_scaffold_27477_120_5	b530fedffc067938104f57eb848897db	276	Pfam	PF00005	ABC transporter	47	201	5.1e-30	T	23-07-2021	IPR003439	ABC transporter-like
Meg22_1416_Bin_151_Lokiarchaeota	Meg22_1416_Bin_151_scaffold_27477_120_5	b530fedffc067938104f57eb848897db	276	SMART	SM00382	AAA_5	54	263	4.6e-11	T	23-07-2021	IPR003593	AAA+ ATPase domain
Meg22_1214_Bin_191_Lokiarchaeota	Meg22_1214_Bin_191_scaffold_8338_61_1	b530fedffc067938104f57eb848897db	276	PANTHER	PTHR43423	ABC TRANSPORTER I FAMILY MEMBER 17	21	276	6.7e-108	T	23-07-2021	IPR005670	Phosphate transport system permease protein 1
Meg22_1214_Bin_191_Lokiarchaeota	Meg22_1214_Bin_191_scaffold_8338_61_1	b530fedffc067938104f57eb848897db	276	CDD	cd03260	ABC_PstB_phosphate_transporter	30	258	7.45967e-147	T	23-07-2021	IPR005670	Phosphate transport system permease protein 1
Meg22_1214_Bin_191_Lokiarchaeota	Meg22_1214_Bin_191_scaffold_8338_61_1	b530fedffc067938104f57eb848897db	276	ProSiteProfiles	PS51238	Phosphate import ATP-binding protein pstB family profile.	230	276	20.798	T	23-07-2021	IPR015850	ABC transporter, phosphate import, PstB
Meg22_1214_Bin_191_Lokiarchaeota	Meg22_1214_Bin_191_scaffold_8338_61_1	b530fedffc067938104f57eb848897db	276	TIGRFAM	TIGR00972	3a0107s01c2: phosphate ABC transporter, ATP-binding protein	30	276	3.2e-124	T	23-07-2021	IPR005670	Phosphate transport system permease protein 1
Meg22_1214_Bin_191_Lokiarchaeota	Meg22_1214_Bin_191_scaffold_8338_61_1	b530fedffc067938104f57eb848897db	276	ProSitePatterns	PS00211	ABC transporters family signature.	173	187	-	T	23-07-2021	IPR017871	ABC transporter, conserved site
Meg22_1214_Bin_191_Lokiarchaeota	Meg22_1214_Bin_191_scaffold_8338_61_1	b530fedffc067938104f57eb848897db	276	ProSiteProfiles	PS50893	ATP-binding cassette, ABC transporter-type domain profile.	30	271	22.763	T	23-07-2021	IPR003439	ABC transporter-like
Meg22_1214_Bin_191_Lokiarchaeota	Meg22_1214_Bin_191_scaffold_8338_61_1	b530fedffc067938104f57eb848897db	276	SUPERFAMILY	SSF52540	P-loop containing nucleoside triphosphate hydrolases	25	263	2.25e-60	T	23-07-2021	IPR027417	P-loop containing nucleoside triphosphate hydrolase
Meg22_1214_Bin_191_Lokiarchaeota	Meg22_1214_Bin_191_scaffold_8338_61_1	b530fedffc067938104f57eb848897db	276	PANTHER	PTHR43423:SF12	IRON EXPORT ATP-BINDING PROTEIN FETA-RELATED	21	276	6.7e-108	T	23-07-2021	-	-
Meg22_1214_Bin_191_Lokiarchaeota	Meg22_1214_Bin_191_scaffold_8338_61_1	b530fedffc067938104f57eb848897db	276	Gene3D	G3DSA:3.40.50.300	-	27	274	3.5e-63	T	23-07-2021	-	-
Meg22_1214_Bin_191_Lokiarchaeota	Meg22_1214_Bin_191_scaffold_8338_61_1	b530fedffc067938104f57eb848897db	276	Pfam	PF00005	ABC transporter	47	201	5.1e-30	T	23-07-2021	IPR003439	ABC transporter-like
Meg22_1214_Bin_191_Lokiarchaeota	Meg22_1214_Bin_191_scaffold_8338_61_1	b530fedffc067938104f57eb848897db	276	SMART	SM00382	AAA_5	54	263	4.6e-11	T	23-07-2021	IPR003593	AAA+ ATPase domain
Meg19_1012_Bin_504_Helarchaeota	Meg19_1012_Bin_504_scaffold_5305_50_12	3d01abbc74757c36463f9cbfe0f4bd8c	136	Coils	Coil	Coil	108	135	-	T	23-07-2021	-	-
Meg19_1012_Bin_504_Helarchaeota	Meg19_1012_Bin_504_scaffold_5305_50_12	3d01abbc74757c36463f9cbfe0f4bd8c	136	Coils	Coil	Coil	58	99	-	T	23-07-2021	-	-
Meg19_1012_Bin_504_Helarchaeota	Meg19_1012_Bin_504_scaffold_5305_50_12	3d01abbc74757c36463f9cbfe0f4bd8c	136	Gene3D	G3DSA:1.20.5.340	-	7	135	3.3e-05	T	23-07-2021	-	-
Meg22_1416_Bin_151_Lokiarchaeota	Meg22_1416_Bin_151_scaffold_1044_28_3	9b5e1eed9c9fc0bd4b6f28c45472c15d	580	Gene3D	G3DSA:3.30.300.30	-	467	575	1.5e-21	T	23-07-2021	-	-
Meg22_1416_Bin_151_Lokiarchaeota	Meg22_1416_Bin_151_scaffold_1044_28_3	9b5e1eed9c9fc0bd4b6f28c45472c15d	580	PANTHER	PTHR43767	LONG-CHAIN-FATTY-ACID--COA LIGASE	34	566	2.4e-77	T	23-07-2021	-	-
Meg22_1416_Bin_151_Lokiarchaeota	Meg22_1416_Bin_151_scaffold_1044_28_3	9b5e1eed9c9fc0bd4b6f28c45472c15d	580	Coils	Coil	Coil	579	580	-	T	23-07-2021	-	-
Meg22_1416_Bin_151_Lokiarchaeota	Meg22_1416_Bin_151_scaffold_1044_28_3	9b5e1eed9c9fc0bd4b6f28c45472c15d	580	Pfam	PF13193	AMP-binding enzyme C-terminal domain	480	554	2e-13	T	23-07-2021	IPR025110	AMP-binding enzyme, C-terminal domain
Meg22_1416_Bin_151_Lokiarchaeota	Meg22_1416_Bin_151_scaffold_1044_28_3	9b5e1eed9c9fc0bd4b6f28c45472c15d	580	SUPERFAMILY	SSF56801	Acetyl-CoA synthetase-like	27	569	2.35e-105	T	23-07-2021	-	-
Meg22_1416_Bin_151_Lokiarchaeota	Meg22_1416_Bin_151_scaffold_1044_28_3	9b5e1eed9c9fc0bd4b6f28c45472c15d	580	ProSitePatterns	PS00455	Putative AMP-binding domain signature.	219	230	-	T	23-07-2021	IPR020845	AMP-binding, conserved site
Meg22_1416_Bin_151_Lokiarchaeota	Meg22_1416_Bin_151_scaffold_1044_28_3	9b5e1eed9c9fc0bd4b6f28c45472c15d	580	PANTHER	PTHR43767:SF1	ACYL--COA LIGASE YDAB-RELATED	34	566	2.4e-77	T	23-07-2021	-	-
Meg22_1416_Bin_151_Lokiarchaeota	Meg22_1416_Bin_151_scaffold_1044_28_3	9b5e1eed9c9fc0bd4b6f28c45472c15d	580	Pfam	PF00501	AMP-binding enzyme	37	470	4.7e-64	T	23-07-2021	IPR000873	AMP-dependent synthetase/ligase
Meg22_1416_Bin_151_Lokiarchaeota	Meg22_1416_Bin_151_scaffold_1044_28_3	9b5e1eed9c9fc0bd4b6f28c45472c15d	580	Gene3D	G3DSA:3.40.50.12780	-	12	461	8.9e-78	T	23-07-2021	IPR042099	AMP-dependent synthetase-like superfamily
Meg22_1214_Bin_191_Lokiarchaeota	Meg22_1214_Bin_191_scaffold_10456_67_4	44d342d88c3c46880dd65cb99a8b89c0	263	Pfam	PF02655	ATP-grasp domain	86	171	1.5e-06	T	23-07-2021	IPR003806	ATP-grasp fold, PylC-type
Meg22_1214_Bin_191_Lokiarchaeota	Meg22_1214_Bin_191_scaffold_10456_67_4	44d342d88c3c46880dd65cb99a8b89c0	263	SUPERFAMILY	SSF56059	Glutathione synthetase ATP-binding domain-like	77	257	3.54e-16	T	23-07-2021	-	-
Meg22_1214_Bin_191_Lokiarchaeota	Meg22_1214_Bin_191_scaffold_10456_67_4	44d342d88c3c46880dd65cb99a8b89c0	263	Gene3D	G3DSA:3.30.470.20	-	100	172	1.8e-06	T	23-07-2021	-	-
Meg22_1012_Bin_233_Lokiarchaeota	Meg22_1012_Bin_233_scaffold_412_18_19	44d342d88c3c46880dd65cb99a8b89c0	263	Pfam	PF02655	ATP-grasp domain	86	171	1.5e-06	T	23-07-2021	IPR003806	ATP-grasp fold, PylC-type
Meg22_1012_Bin_233_Lokiarchaeota	Meg22_1012_Bin_233_scaffold_412_18_19	44d342d88c3c46880dd65cb99a8b89c0	263	SUPERFAMILY	SSF56059	Glutathione synthetase ATP-binding domain-like	77	257	3.54e-16	T	23-07-2021	-	-
Meg22_1012_Bin_233_Lokiarchaeota	Meg22_1012_Bin_233_scaffold_412_18_19	44d342d88c3c46880dd65cb99a8b89c0	263	Gene3D	G3DSA:3.30.470.20	-	100	172	1.8e-06	T	23-07-2021	-	-
Meg22_1416_Bin_151_Lokiarchaeota	Meg22_1416_Bin_151_scaffold_329_8_47	44d342d88c3c46880dd65cb99a8b89c0	263	Pfam	PF02655	ATP-grasp domain	86	171	1.5e-06	T	23-07-2021	IPR003806	ATP-grasp fold, PylC-type
Meg22_1416_Bin_151_Lokiarchaeota	Meg22_1416_Bin_151_scaffold_329_8_47	44d342d88c3c46880dd65cb99a8b89c0	263	SUPERFAMILY	SSF56059	Glutathione synthetase ATP-binding domain-like	77	257	3.54e-16	T	23-07-2021	-	-
Meg22_1416_Bin_151_Lokiarchaeota	Meg22_1416_Bin_151_scaffold_329_8_47	44d342d88c3c46880dd65cb99a8b89c0	263	Gene3D	G3DSA:3.30.470.20	-	100	172	1.8e-06	T	23-07-2021	-	-
Meg19_1012_Bin_504_Helarchaeota	Meg19_1012_Bin_504_scaffold_401_3_47	6007d82776bcc6ceb3d26fdc943d3e69	264	Pfam	PF13424	Tetratricopeptide repeat	112	178	1.1e-16	T	23-07-2021	-	-
Meg19_1012_Bin_504_Helarchaeota	Meg19_1012_Bin_504_scaffold_401_3_47	6007d82776bcc6ceb3d26fdc943d3e69	264	ProSiteProfiles	PS50005	TPR repeat profile.	148	181	9.617	T	23-07-2021	IPR019734	Tetratricopeptide repeat
Meg19_1012_Bin_504_Helarchaeota	Meg19_1012_Bin_504_scaffold_401_3_47	6007d82776bcc6ceb3d26fdc943d3e69	264	SUPERFAMILY	SSF48452	TPR-like	40	261	3.98e-32	T	23-07-2021	IPR011990	Tetratricopeptide-like helical domain superfamily
Meg19_1012_Bin_504_Helarchaeota	Meg19_1012_Bin_504_scaffold_401_3_47	6007d82776bcc6ceb3d26fdc943d3e69	264	PANTHER	PTHR10098	RAPSYN-RELATED	24	235	1.1e-27	T	23-07-2021	-	-
Meg19_1012_Bin_504_Helarchaeota	Meg19_1012_Bin_504_scaffold_401_3_47	6007d82776bcc6ceb3d26fdc943d3e69	264	Gene3D	G3DSA:1.25.40.10	-	43	264	1.5e-42	T	23-07-2021	IPR011990	Tetratricopeptide-like helical domain superfamily
Meg19_1012_Bin_504_Helarchaeota	Meg19_1012_Bin_504_scaffold_401_3_47	6007d82776bcc6ceb3d26fdc943d3e69	264	ProSiteProfiles	PS50005	TPR repeat profile.	108	141	10.797	T	23-07-2021	IPR019734	Tetratricopeptide repeat
Meg19_1012_Bin_504_Helarchaeota	Meg19_1012_Bin_504_scaffold_401_3_47	6007d82776bcc6ceb3d26fdc943d3e69	264	SMART	SM00028	tpr_5	108	141	1e-05	T	23-07-2021	IPR019734	Tetratricopeptide repeat
Meg19_1012_Bin_504_Helarchaeota	Meg19_1012_Bin_504_scaffold_401_3_47	6007d82776bcc6ceb3d26fdc943d3e69	264	SMART	SM00028	tpr_5	148	181	0.00039	T	23-07-2021	IPR019734	Tetratricopeptide repeat
Meg19_1012_Bin_504_Helarchaeota	Meg19_1012_Bin_504_scaffold_401_3_47	6007d82776bcc6ceb3d26fdc943d3e69	264	SMART	SM00028	tpr_5	67	101	45	T	23-07-2021	IPR019734	Tetratricopeptide repeat
Meg19_1012_Bin_504_Helarchaeota	Meg19_1012_Bin_504_scaffold_401_3_47	6007d82776bcc6ceb3d26fdc943d3e69	264	SMART	SM00028	tpr_5	188	221	120	T	23-07-2021	IPR019734	Tetratricopeptide repeat
Meg19_1012_Bin_504_Helarchaeota	Meg19_1012_Bin_504_scaffold_401_3_47	6007d82776bcc6ceb3d26fdc943d3e69	264	ProSiteProfiles	PS50293	TPR repeat region circular profile.	67	221	17.547	T	23-07-2021	IPR013026	Tetratricopeptide repeat-containing domain
Meg22_1214_Bin_191_Lokiarchaeota	Meg22_1214_Bin_191_scaffold_6805_52_5	b8c242f0411cac3ad0a88386a3f8da40	95	Gene3D	G3DSA:1.10.10.10	winged helix"" repressor DNA binding domain	7	89	6.1e-14	T	23-07-2021	IPR036388	Winged helix-like DNA-binding domain superfamily
Meg22_1214_Bin_191_Lokiarchaeota	Meg22_1214_Bin_191_scaffold_6805_52_5	b8c242f0411cac3ad0a88386a3f8da40	95	SUPERFAMILY	SSF46785	Winged helix DNA-binding domain	9	80	2.14e-15	T	23-07-2021	IPR036390	Winged helix DNA-binding domain superfamily
Meg22_1214_Bin_191_Lokiarchaeota	Meg22_1214_Bin_191_scaffold_6805_52_5	b8c242f0411cac3ad0a88386a3f8da40	95	CDD	cd00090	HTH_ARSR	13	79	1.23344e-10	T	23-07-2021	IPR011991	ArsR-like helix-turn-helix domain
Meg22_1214_Bin_191_Lokiarchaeota	Meg22_1214_Bin_191_scaffold_6805_52_5	b8c242f0411cac3ad0a88386a3f8da40	95	SMART	SM00418	arsrmega2	10	90	0.00092	T	23-07-2021	IPR001845	HTH ArsR-type DNA-binding domain
Meg22_1214_Bin_191_Lokiarchaeota	Meg22_1214_Bin_191_scaffold_6805_52_5	b8c242f0411cac3ad0a88386a3f8da40	95	Pfam	PF01022	Bacterial regulatory protein, arsR family	18	63	1.4e-09	T	23-07-2021	IPR001845	HTH ArsR-type DNA-binding domain
Meg22_1214_Bin_191_Lokiarchaeota	Meg22_1214_Bin_191_scaffold_6805_52_5	b8c242f0411cac3ad0a88386a3f8da40	95	ProSiteProfiles	PS50987	ArsR-type HTH domain profile.	1	95	12.597	T	23-07-2021	IPR001845	HTH ArsR-type DNA-binding domain
Meg22_1416_Bin_151_Lokiarchaeota	Meg22_1416_Bin_151_scaffold_3752_67_15	f3063cc486eed4f3cd960a6f733bf152	359	Gene3D	G3DSA:1.50.10.20	-	27	294	6.9e-27	T	23-07-2021	-	-
Meg22_1416_Bin_151_Lokiarchaeota	Meg22_1416_Bin_151_scaffold_3752_67_15	f3063cc486eed4f3cd960a6f733bf152	359	PANTHER	PTHR11774	GERANYLGERANYL TRANSFERASE TYPE BETA SUBUNIT	20	217	3.8e-30	T	23-07-2021	-	-
Meg22_1416_Bin_151_Lokiarchaeota	Meg22_1416_Bin_151_scaffold_3752_67_15	f3063cc486eed4f3cd960a6f733bf152	359	PANTHER	PTHR11774	GERANYLGERANYL TRANSFERASE TYPE BETA SUBUNIT	71	290	3.8e-30	T	23-07-2021	-	-
Meg22_1416_Bin_151_Lokiarchaeota	Meg22_1416_Bin_151_scaffold_3752_67_15	f3063cc486eed4f3cd960a6f733bf152	359	CDD	cd00688	ISOPREN_C2_like	96	311	1.28519e-14	T	23-07-2021	-	-
Meg22_1416_Bin_151_Lokiarchaeota	Meg22_1416_Bin_151_scaffold_3752_67_15	f3063cc486eed4f3cd960a6f733bf152	359	SUPERFAMILY	SSF48239	Terpenoid cyclases/Protein prenyltransferases	92	315	3.56e-22	T	23-07-2021	IPR008930	Terpenoid cyclases/protein prenyltransferase alpha-alpha toroid
Meg22_1416_Bin_151_Lokiarchaeota	Meg22_1416_Bin_151_scaffold_3752_67_15	f3063cc486eed4f3cd960a6f733bf152	359	Pfam	PF00432	Prenyltransferase and squalene oxidase repeat	168	203	2.6e-05	T	23-07-2021	IPR001330	PFTB repeat
Meg22_1416_Bin_151_Lokiarchaeota	Meg22_1416_Bin_151_scaffold_3752_67_15	f3063cc486eed4f3cd960a6f733bf152	359	Pfam	PF00432	Prenyltransferase and squalene oxidase repeat	269	287	0.41	T	23-07-2021	IPR001330	PFTB repeat
Meg19_1012_Bin_504_Helarchaeota	Meg19_1012_Bin_504_scaffold_4218_45_14	23a99225eb2b3cf5cb13106305ad93f6	329	Gene3D	G3DSA:3.90.1640.10	-	5	203	4e-36	T	23-07-2021	-	-
Meg19_1012_Bin_504_Helarchaeota	Meg19_1012_Bin_504_scaffold_4218_45_14	23a99225eb2b3cf5cb13106305ad93f6	329	SUPERFAMILY	SSF64182	DHH phosphoesterases	14	309	1.03e-38	T	23-07-2021	IPR038763	DHH phosphoesterase superfamily
Meg19_1012_Bin_504_Helarchaeota	Meg19_1012_Bin_504_scaffold_4218_45_14	23a99225eb2b3cf5cb13106305ad93f6	329	Pfam	PF01368	DHH family	15	161	1.3e-10	T	23-07-2021	IPR001667	DDH domain
Meg19_1012_Bin_504_Helarchaeota	Meg19_1012_Bin_504_scaffold_4218_45_14	23a99225eb2b3cf5cb13106305ad93f6	329	PANTHER	PTHR47618	BIFUNCTIONAL OLIGORIBONUCLEASE AND PAP PHOSPHATASE NRNA	11	322	1.5e-39	T	23-07-2021	-	-
Meg19_1012_Bin_504_Helarchaeota	Meg19_1012_Bin_504_scaffold_4218_45_14	23a99225eb2b3cf5cb13106305ad93f6	329	Pfam	PF02272	DHHA1 domain	201	315	4.3e-10	T	23-07-2021	IPR003156	DHHA1 domain
Meg22_1214_Bin_191_Lokiarchaeota	Meg22_1214_Bin_191_scaffold_7521_57_14	c831a6ab30825516c2cf9c447b4df692	175	Gene3D	G3DSA:3.10.110.10	Ubiquitin Conjugating Enzyme	2	175	3.2e-37	T	23-07-2021	IPR016135	Ubiquitin-conjugating enzyme/RWD-like
Meg22_1214_Bin_191_Lokiarchaeota	Meg22_1214_Bin_191_scaffold_7521_57_14	c831a6ab30825516c2cf9c447b4df692	175	ProSiteProfiles	PS50127	Ubiquitin-conjugating enzymes family profile.	6	161	24.285	T	23-07-2021	IPR000608	Ubiquitin-conjugating enzyme E2
Meg22_1214_Bin_191_Lokiarchaeota	Meg22_1214_Bin_191_scaffold_7521_57_14	c831a6ab30825516c2cf9c447b4df692	175	PANTHER	PTHR24067:SF3	UBIQUITIN-CONJUGATING ENZYME E2 G1	23	171	2e-20	T	23-07-2021	-	-
Meg22_1214_Bin_191_Lokiarchaeota	Meg22_1214_Bin_191_scaffold_7521_57_14	c831a6ab30825516c2cf9c447b4df692	175	PANTHER	PTHR24067	UBIQUITIN-CONJUGATING ENZYME E2	23	171	2e-20	T	23-07-2021	-	-
Meg22_1214_Bin_191_Lokiarchaeota	Meg22_1214_Bin_191_scaffold_7521_57_14	c831a6ab30825516c2cf9c447b4df692	175	SMART	SM00212	ubc_7	6	172	6.2e-29	T	23-07-2021	-	-
Meg22_1214_Bin_191_Lokiarchaeota	Meg22_1214_Bin_191_scaffold_7521_57_14	c831a6ab30825516c2cf9c447b4df692	175	CDD	cd00195	UBCc	5	167	1.91455e-34	T	23-07-2021	IPR000608	Ubiquitin-conjugating enzyme E2
Meg22_1214_Bin_191_Lokiarchaeota	Meg22_1214_Bin_191_scaffold_7521_57_14	c831a6ab30825516c2cf9c447b4df692	175	Pfam	PF00179	Ubiquitin-conjugating enzyme	7	165	7.9e-25	T	23-07-2021	IPR000608	Ubiquitin-conjugating enzyme E2
Meg22_1214_Bin_191_Lokiarchaeota	Meg22_1214_Bin_191_scaffold_7521_57_14	c831a6ab30825516c2cf9c447b4df692	175	SUPERFAMILY	SSF54495	UBC-like	1	173	6.56e-35	T	23-07-2021	IPR016135	Ubiquitin-conjugating enzyme/RWD-like
Meg22_1012_Bin_233_Lokiarchaeota	Meg22_1012_Bin_233_scaffold_1758_31_14	c831a6ab30825516c2cf9c447b4df692	175	Gene3D	G3DSA:3.10.110.10	Ubiquitin Conjugating Enzyme	2	175	3.2e-37	T	23-07-2021	IPR016135	Ubiquitin-conjugating enzyme/RWD-like
Meg22_1012_Bin_233_Lokiarchaeota	Meg22_1012_Bin_233_scaffold_1758_31_14	c831a6ab30825516c2cf9c447b4df692	175	ProSiteProfiles	PS50127	Ubiquitin-conjugating enzymes family profile.	6	161	24.285	T	23-07-2021	IPR000608	Ubiquitin-conjugating enzyme E2
Meg22_1012_Bin_233_Lokiarchaeota	Meg22_1012_Bin_233_scaffold_1758_31_14	c831a6ab30825516c2cf9c447b4df692	175	PANTHER	PTHR24067:SF3	UBIQUITIN-CONJUGATING ENZYME E2 G1	23	171	2e-20	T	23-07-2021	-	-
Meg22_1012_Bin_233_Lokiarchaeota	Meg22_1012_Bin_233_scaffold_1758_31_14	c831a6ab30825516c2cf9c447b4df692	175	PANTHER	PTHR24067	UBIQUITIN-CONJUGATING ENZYME E2	23	171	2e-20	T	23-07-2021	-	-
Meg22_1012_Bin_233_Lokiarchaeota	Meg22_1012_Bin_233_scaffold_1758_31_14	c831a6ab30825516c2cf9c447b4df692	175	SMART	SM00212	ubc_7	6	172	6.2e-29	T	23-07-2021	-	-
Meg22_1012_Bin_233_Lokiarchaeota	Meg22_1012_Bin_233_scaffold_1758_31_14	c831a6ab30825516c2cf9c447b4df692	175	CDD	cd00195	UBCc	5	167	1.91455e-34	T	23-07-2021	IPR000608	Ubiquitin-conjugating enzyme E2
Meg22_1012_Bin_233_Lokiarchaeota	Meg22_1012_Bin_233_scaffold_1758_31_14	c831a6ab30825516c2cf9c447b4df692	175	Pfam	PF00179	Ubiquitin-conjugating enzyme	7	165	7.9e-25	T	23-07-2021	IPR000608	Ubiquitin-conjugating enzyme E2
Meg22_1012_Bin_233_Lokiarchaeota	Meg22_1012_Bin_233_scaffold_1758_31_14	c831a6ab30825516c2cf9c447b4df692	175	SUPERFAMILY	SSF54495	UBC-like	1	173	6.56e-35	T	23-07-2021	IPR016135	Ubiquitin-conjugating enzyme/RWD-like
Meg22_1416_Bin_151_Lokiarchaeota	Meg22_1416_Bin_151_scaffold_7079_79_4	c831a6ab30825516c2cf9c447b4df692	175	Gene3D	G3DSA:3.10.110.10	Ubiquitin Conjugating Enzyme	2	175	3.2e-37	T	23-07-2021	IPR016135	Ubiquitin-conjugating enzyme/RWD-like
Meg22_1416_Bin_151_Lokiarchaeota	Meg22_1416_Bin_151_scaffold_7079_79_4	c831a6ab30825516c2cf9c447b4df692	175	ProSiteProfiles	PS50127	Ubiquitin-conjugating enzymes family profile.	6	161	24.285	T	23-07-2021	IPR000608	Ubiquitin-conjugating enzyme E2
Meg22_1416_Bin_151_Lokiarchaeota	Meg22_1416_Bin_151_scaffold_7079_79_4	c831a6ab30825516c2cf9c447b4df692	175	PANTHER	PTHR24067:SF3	UBIQUITIN-CONJUGATING ENZYME E2 G1	23	171	2e-20	T	23-07-2021	-	-
Meg22_1416_Bin_151_Lokiarchaeota	Meg22_1416_Bin_151_scaffold_7079_79_4	c831a6ab30825516c2cf9c447b4df692	175	PANTHER	PTHR24067	UBIQUITIN-CONJUGATING ENZYME E2	23	171	2e-20	T	23-07-2021	-	-
Meg22_1416_Bin_151_Lokiarchaeota	Meg22_1416_Bin_151_scaffold_7079_79_4	c831a6ab30825516c2cf9c447b4df692	175	SMART	SM00212	ubc_7	6	172	6.2e-29	T	23-07-2021	-	-
Meg22_1416_Bin_151_Lokiarchaeota	Meg22_1416_Bin_151_scaffold_7079_79_4	c831a6ab30825516c2cf9c447b4df692	175	CDD	cd00195	UBCc	5	167	1.91455e-34	T	23-07-2021	IPR000608	Ubiquitin-conjugating enzyme E2
Meg22_1416_Bin_151_Lokiarchaeota	Meg22_1416_Bin_151_scaffold_7079_79_4	c831a6ab30825516c2cf9c447b4df692	175	Pfam	PF00179	Ubiquitin-conjugating enzyme	7	165	7.9e-25	T	23-07-2021	IPR000608	Ubiquitin-conjugating enzyme E2
Meg22_1416_Bin_151_Lokiarchaeota	Meg22_1416_Bin_151_scaffold_7079_79_4	c831a6ab30825516c2cf9c447b4df692	175	SUPERFAMILY	SSF54495	UBC-like	1	173	6.56e-35	T	23-07-2021	IPR016135	Ubiquitin-conjugating enzyme/RWD-like
Meg19_1012_Bin_504_Helarchaeota	Meg19_1012_Bin_504_scaffold_14488_79_16	d36b838fd0ad4505efa5c075d97be61b	70	Gene3D	G3DSA:3.30.1660.10	-	3	70	1.9e-28	T	23-07-2021	IPR025543	Dodecin-like
Meg19_1012_Bin_504_Helarchaeota	Meg19_1012_Bin_504_scaffold_14488_79_16	d36b838fd0ad4505efa5c075d97be61b	70	PANTHER	PTHR39324	CALCIUM DODECIN	2	69	7.4e-19	T	23-07-2021	IPR009923	Dodecin
Meg19_1012_Bin_504_Helarchaeota	Meg19_1012_Bin_504_scaffold_14488_79_16	d36b838fd0ad4505efa5c075d97be61b	70	SUPERFAMILY	SSF89807	Dodecin-like	4	68	2.49e-21	T	23-07-2021	IPR036694	Dodecin-like superfamily
Meg19_1012_Bin_504_Helarchaeota	Meg19_1012_Bin_504_scaffold_14488_79_16	d36b838fd0ad4505efa5c075d97be61b	70	Pfam	PF07311	Dodecin	5	68	1.4e-25	T	23-07-2021	IPR009923	Dodecin
Meg22_1012_Bin_233_Lokiarchaeota	Meg22_1012_Bin_233_scaffold_89_10_34	783dc7184cd4b046a693acba4dde838c	263	ProSitePatterns	PS00379	CDP-alcohol phosphatidyltransferases signature.	54	76	-	T	23-07-2021	IPR000462	CDP-alcohol phosphatidyltransferase
Meg22_1012_Bin_233_Lokiarchaeota	Meg22_1012_Bin_233_scaffold_89_10_34	783dc7184cd4b046a693acba4dde838c	263	PANTHER	PTHR14269:SF47	CDP-DIACYLGLYCEROL--SERINE O-PHOSPHATIDYLTRANSFERASE	14	145	1.4e-12	T	23-07-2021	-	-
Meg22_1012_Bin_233_Lokiarchaeota	Meg22_1012_Bin_233_scaffold_89_10_34	783dc7184cd4b046a693acba4dde838c	263	Gene3D	G3DSA:1.20.120.1760	-	12	158	2e-08	T	23-07-2021	IPR043130	CDP-alcohol phosphotransferase, transmembrane domain
Meg22_1012_Bin_233_Lokiarchaeota	Meg22_1012_Bin_233_scaffold_89_10_34	783dc7184cd4b046a693acba4dde838c	263	Pfam	PF01066	CDP-alcohol phosphatidyltransferase	13	76	2.8e-10	T	23-07-2021	IPR000462	CDP-alcohol phosphatidyltransferase
Meg22_1012_Bin_233_Lokiarchaeota	Meg22_1012_Bin_233_scaffold_89_10_34	783dc7184cd4b046a693acba4dde838c	263	PANTHER	PTHR14269	CDP-DIACYLGLYCEROL--GLYCEROL-3-PHOSPHATE 3-PHOSPHATIDYLTRANSFERASE-RELATED	14	145	1.4e-12	T	23-07-2021	-	-
Meg22_1214_Bin_191_Lokiarchaeota	Meg22_1214_Bin_191_scaffold_1587_22_12	783dc7184cd4b046a693acba4dde838c	263	ProSitePatterns	PS00379	CDP-alcohol phosphatidyltransferases signature.	54	76	-	T	23-07-2021	IPR000462	CDP-alcohol phosphatidyltransferase
Meg22_1214_Bin_191_Lokiarchaeota	Meg22_1214_Bin_191_scaffold_1587_22_12	783dc7184cd4b046a693acba4dde838c	263	PANTHER	PTHR14269:SF47	CDP-DIACYLGLYCEROL--SERINE O-PHOSPHATIDYLTRANSFERASE	14	145	1.4e-12	T	23-07-2021	-	-
Meg22_1214_Bin_191_Lokiarchaeota	Meg22_1214_Bin_191_scaffold_1587_22_12	783dc7184cd4b046a693acba4dde838c	263	Gene3D	G3DSA:1.20.120.1760	-	12	158	2e-08	T	23-07-2021	IPR043130	CDP-alcohol phosphotransferase, transmembrane domain
Meg22_1214_Bin_191_Lokiarchaeota	Meg22_1214_Bin_191_scaffold_1587_22_12	783dc7184cd4b046a693acba4dde838c	263	Pfam	PF01066	CDP-alcohol phosphatidyltransferase	13	76	2.8e-10	T	23-07-2021	IPR000462	CDP-alcohol phosphatidyltransferase
Meg22_1214_Bin_191_Lokiarchaeota	Meg22_1214_Bin_191_scaffold_1587_22_12	783dc7184cd4b046a693acba4dde838c	263	PANTHER	PTHR14269	CDP-DIACYLGLYCEROL--GLYCEROL-3-PHOSPHATE 3-PHOSPHATIDYLTRANSFERASE-RELATED	14	145	1.4e-12	T	23-07-2021	-	-
Meg22_1012_Bin_233_Lokiarchaeota	Meg22_1012_Bin_233_scaffold_45_8_71	fc76c2c56f44d46de436865048df5ba1	1104	SMART	SM00851	MGS_2a	972	1067	8.6e-18	T	23-07-2021	IPR011607	Methylglyoxal synthase-like domain
Meg22_1012_Bin_233_Lokiarchaeota	Meg22_1012_Bin_233_scaffold_45_8_71	fc76c2c56f44d46de436865048df5ba1	1104	PRINTS	PR00098	Carbamoyl-phosphate synthase protein CPSase domain signature	19	33	8.7e-66	T	23-07-2021	IPR005483	Carbamoyl-phosphate synthase large subunit, CPSase domain
Meg22_1012_Bin_233_Lokiarchaeota	Meg22_1012_Bin_233_scaffold_45_8_71	fc76c2c56f44d46de436865048df5ba1	1104	PRINTS	PR00098	Carbamoyl-phosphate synthase protein CPSase domain signature	48	58	8.7e-66	T	23-07-2021	IPR005483	Carbamoyl-phosphate synthase large subunit, CPSase domain
Meg22_1012_Bin_233_Lokiarchaeota	Meg22_1012_Bin_233_scaffold_45_8_71	fc76c2c56f44d46de436865048df5ba1	1104	PRINTS	PR00098	Carbamoyl-phosphate synthase protein CPSase domain signature	378	396	8.7e-66	T	23-07-2021	IPR005483	Carbamoyl-phosphate synthase large subunit, CPSase domain
Meg22_1012_Bin_233_Lokiarchaeota	Meg22_1012_Bin_233_scaffold_45_8_71	fc76c2c56f44d46de436865048df5ba1	1104	PRINTS	PR00098	Carbamoyl-phosphate synthase protein CPSase domain signature	204	223	8.7e-66	T	23-07-2021	IPR005483	Carbamoyl-phosphate synthase large subunit, CPSase domain
Meg22_1012_Bin_233_Lokiarchaeota	Meg22_1012_Bin_233_scaffold_45_8_71	fc76c2c56f44d46de436865048df5ba1	1104	PRINTS	PR00098	Carbamoyl-phosphate synthase protein CPSase domain signature	168	180	8.7e-66	T	23-07-2021	IPR005483	Carbamoyl-phosphate synthase large subunit, CPSase domain
Meg22_1012_Bin_233_Lokiarchaeota	Meg22_1012_Bin_233_scaffold_45_8_71	fc76c2c56f44d46de436865048df5ba1	1104	PRINTS	PR00098	Carbamoyl-phosphate synthase protein CPSase domain signature	239	256	8.7e-66	T	23-07-2021	IPR005483	Carbamoyl-phosphate synthase large subunit, CPSase domain
Meg22_1012_Bin_233_Lokiarchaeota	Meg22_1012_Bin_233_scaffold_45_8_71	fc76c2c56f44d46de436865048df5ba1	1104	PRINTS	PR00098	Carbamoyl-phosphate synthase protein CPSase domain signature	296	325	8.7e-66	T	23-07-2021	IPR005483	Carbamoyl-phosphate synthase large subunit, CPSase domain
Meg22_1012_Bin_233_Lokiarchaeota	Meg22_1012_Bin_233_scaffold_45_8_71	fc76c2c56f44d46de436865048df5ba1	1104	Pfam	PF02787	Carbamoyl-phosphate synthetase large chain, oligomerisation domain	425	506	1.8e-25	T	23-07-2021	IPR005480	Carbamoyl-phosphate synthetase, large subunit oligomerisation domain
Meg22_1012_Bin_233_Lokiarchaeota	Meg22_1012_Bin_233_scaffold_45_8_71	fc76c2c56f44d46de436865048df5ba1	1104	ProSitePatterns	PS00867	Carbamoyl-phosphate synthase subdomain signature 2.	296	303	-	T	23-07-2021	IPR005479	Carbamoyl-phosphate synthetase large subunit-like, ATP-binding domain
Meg22_1012_Bin_233_Lokiarchaeota	Meg22_1012_Bin_233_scaffold_45_8_71	fc76c2c56f44d46de436865048df5ba1	1104	ProSitePatterns	PS00866	Carbamoyl-phosphate synthase subdomain signature 1.	725	739	-	T	23-07-2021	IPR005479	Carbamoyl-phosphate synthetase large subunit-like, ATP-binding domain
Meg22_1012_Bin_233_Lokiarchaeota	Meg22_1012_Bin_233_scaffold_45_8_71	fc76c2c56f44d46de436865048df5ba1	1104	SUPERFAMILY	SSF56059	Glutathione synthetase ATP-binding domain-like	128	399	1.26e-99	T	23-07-2021	-	-
Meg22_1012_Bin_233_Lokiarchaeota	Meg22_1012_Bin_233_scaffold_45_8_71	fc76c2c56f44d46de436865048df5ba1	1104	Gene3D	G3DSA:3.40.50.1380	-	955	1100	1.3e-39	T	23-07-2021	IPR036914	Methylglyoxal synthase-like domain superfamily
Meg22_1012_Bin_233_Lokiarchaeota	Meg22_1012_Bin_233_scaffold_45_8_71	fc76c2c56f44d46de436865048df5ba1	1104	SUPERFAMILY	SSF52440	PreATP-grasp domain	564	690	3.17e-36	T	23-07-2021	IPR016185	Pre-ATP-grasp domain superfamily
Meg22_1012_Bin_233_Lokiarchaeota	Meg22_1012_Bin_233_scaffold_45_8_71	fc76c2c56f44d46de436865048df5ba1	1104	Gene3D	G3DSA:3.40.50.20	-	1	116	5.4e-48	T	23-07-2021	-	-
Meg22_1012_Bin_233_Lokiarchaeota	Meg22_1012_Bin_233_scaffold_45_8_71	fc76c2c56f44d46de436865048df5ba1	1104	Gene3D	G3DSA:3.40.50.20	-	561	677	7.2e-35	T	23-07-2021	-	-
Meg22_1012_Bin_233_Lokiarchaeota	Meg22_1012_Bin_233_scaffold_45_8_71	fc76c2c56f44d46de436865048df5ba1	1104	TIGRFAM	TIGR01369	CPSaseII_lrg: carbamoyl-phosphate synthase, large subunit	4	1078	0	T	23-07-2021	IPR006275	Carbamoyl-phosphate synthase, large subunit
Meg22_1012_Bin_233_Lokiarchaeota	Meg22_1012_Bin_233_scaffold_45_8_71	fc76c2c56f44d46de436865048df5ba1	1104	Gene3D	G3DSA:3.30.470.20	-	120	401	1.3e-121	T	23-07-2021	-	-
Meg22_1012_Bin_233_Lokiarchaeota	Meg22_1012_Bin_233_scaffold_45_8_71	fc76c2c56f44d46de436865048df5ba1	1104	SUPERFAMILY	SSF48108	Carbamoyl phosphate synthetase, large subunit connection domain	394	555	3.14e-48	T	23-07-2021	IPR036897	Carbamoyl-phosphate synthetase, large subunit oligomerisation domain superfamily
Meg22_1012_Bin_233_Lokiarchaeota	Meg22_1012_Bin_233_scaffold_45_8_71	fc76c2c56f44d46de436865048df5ba1	1104	ProSitePatterns	PS00867	Carbamoyl-phosphate synthase subdomain signature 2.	854	861	-	T	23-07-2021	IPR005479	Carbamoyl-phosphate synthetase large subunit-like, ATP-binding domain
Meg22_1012_Bin_233_Lokiarchaeota	Meg22_1012_Bin_233_scaffold_45_8_71	fc76c2c56f44d46de436865048df5ba1	1104	Hamap	MF_01210_A	Carbamoyl-phosphate synthase large chain [carB].	5	1095	13.1704	T	23-07-2021	IPR006275	Carbamoyl-phosphate synthase, large subunit
Meg22_1012_Bin_233_Lokiarchaeota	Meg22_1012_Bin_233_scaffold_45_8_71	fc76c2c56f44d46de436865048df5ba1	1104	PANTHER	PTHR11405	CARBAMOYLTRANSFERASE FAMILY MEMBER	5	1099	0	T	23-07-2021	-	-
Meg22_1012_Bin_233_Lokiarchaeota	Meg22_1012_Bin_233_scaffold_45_8_71	fc76c2c56f44d46de436865048df5ba1	1104	ProSiteProfiles	PS50975	ATP-grasp fold profile.	694	885	42.526	T	23-07-2021	IPR011761	ATP-grasp fold
Meg22_1012_Bin_233_Lokiarchaeota	Meg22_1012_Bin_233_scaffold_45_8_71	fc76c2c56f44d46de436865048df5ba1	1104	SUPERFAMILY	SSF52335	Methylglyoxal synthase-like	958	1097	2.09e-28	T	23-07-2021	IPR036914	Methylglyoxal synthase-like domain superfamily
Meg22_1012_Bin_233_Lokiarchaeota	Meg22_1012_Bin_233_scaffold_45_8_71	fc76c2c56f44d46de436865048df5ba1	1104	Pfam	PF02786	Carbamoyl-phosphate synthase L chain, ATP binding domain	128	333	1.7e-75	T	23-07-2021	IPR005479	Carbamoyl-phosphate synthetase large subunit-like, ATP-binding domain
Meg22_1012_Bin_233_Lokiarchaeota	Meg22_1012_Bin_233_scaffold_45_8_71	fc76c2c56f44d46de436865048df5ba1	1104	Pfam	PF02786	Carbamoyl-phosphate synthase L chain, ATP binding domain	689	891	9.3e-27	T	23-07-2021	IPR005479	Carbamoyl-phosphate synthetase large subunit-like, ATP-binding domain
Meg22_1012_Bin_233_Lokiarchaeota	Meg22_1012_Bin_233_scaffold_45_8_71	fc76c2c56f44d46de436865048df5ba1	1104	Gene3D	G3DSA:3.30.470.20	-	682	950	1.9e-97	T	23-07-2021	-	-
Meg22_1012_Bin_233_Lokiarchaeota	Meg22_1012_Bin_233_scaffold_45_8_71	fc76c2c56f44d46de436865048df5ba1	1104	SMART	SM01096	CPSase_L_D3_2	421	548	1.6e-55	T	23-07-2021	IPR005480	Carbamoyl-phosphate synthetase, large subunit oligomerisation domain
Meg22_1012_Bin_233_Lokiarchaeota	Meg22_1012_Bin_233_scaffold_45_8_71	fc76c2c56f44d46de436865048df5ba1	1104	ProSiteProfiles	PS50975	ATP-grasp fold profile.	133	327	40.096	T	23-07-2021	IPR011761	ATP-grasp fold
Meg22_1012_Bin_233_Lokiarchaeota	Meg22_1012_Bin_233_scaffold_45_8_71	fc76c2c56f44d46de436865048df5ba1	1104	ProSiteProfiles	PS51855	MGS-like domain profile.	951	1102	24.404	T	23-07-2021	IPR011607	Methylglyoxal synthase-like domain
Meg22_1012_Bin_233_Lokiarchaeota	Meg22_1012_Bin_233_scaffold_45_8_71	fc76c2c56f44d46de436865048df5ba1	1104	SUPERFAMILY	SSF56059	Glutathione synthetase ATP-binding domain-like	689	948	1.22e-87	T	23-07-2021	-	-
Meg22_1012_Bin_233_Lokiarchaeota	Meg22_1012_Bin_233_scaffold_45_8_71	fc76c2c56f44d46de436865048df5ba1	1104	SUPERFAMILY	SSF52440	PreATP-grasp domain	1	127	3.88e-44	T	23-07-2021	IPR016185	Pre-ATP-grasp domain superfamily
Meg22_1012_Bin_233_Lokiarchaeota	Meg22_1012_Bin_233_scaffold_45_8_71	fc76c2c56f44d46de436865048df5ba1	1104	Gene3D	G3DSA:1.10.1030.10	Carbamoyl Phosphate Synthetase; Chain A	403	553	5.7e-48	T	23-07-2021	IPR036897	Carbamoyl-phosphate synthetase, large subunit oligomerisation domain superfamily
Meg22_1012_Bin_233_Lokiarchaeota	Meg22_1012_Bin_233_scaffold_45_8_71	fc76c2c56f44d46de436865048df5ba1	1104	Pfam	PF02142	MGS-like domain	973	1066	5.2e-19	T	23-07-2021	IPR011607	Methylglyoxal synthase-like domain
Meg22_1012_Bin_233_Lokiarchaeota	Meg22_1012_Bin_233_scaffold_45_8_71	fc76c2c56f44d46de436865048df5ba1	1104	PANTHER	PTHR11405:SF5	CAD PROTEIN	5	1099	0	T	23-07-2021	-	-
Meg19_1012_Bin_504_Helarchaeota	Meg19_1012_Bin_504_scaffold_3834_42_1	b9202a642f75886d5b102c67bcb13f2f	152	MobiDBLite	mobidb-lite	consensus disorder prediction	54	91	-	T	23-07-2021	-	-
Meg19_1012_Bin_504_Helarchaeota	Meg19_1012_Bin_504_scaffold_1750_22_38	5a033680e381da18165bc2cd9f0cd1f8	108	Coils	Coil	Coil	81	108	-	T	23-07-2021	-	-
Meg22_1012_Bin_233_Lokiarchaeota	Meg22_1012_Bin_233_scaffold_21_5_51	cab0097229fb9413053d08b7b0b056bd	115	Coils	Coil	Coil	93	113	-	T	23-07-2021	-	-
Meg22_1012_Bin_233_Lokiarchaeota	Meg22_1012_Bin_233_scaffold_21_5_51	cab0097229fb9413053d08b7b0b056bd	115	PIRSF	PIRSF015730	TFAR19	1	115	7.1e-27	T	23-07-2021	IPR002836	PDCD5-like
Meg22_1012_Bin_233_Lokiarchaeota	Meg22_1012_Bin_233_scaffold_21_5_51	cab0097229fb9413053d08b7b0b056bd	115	SUPERFAMILY	SSF46950	Double-stranded DNA-binding domain	10	111	7.85e-23	T	23-07-2021	IPR036883	PDCD5-like superfamily
Meg22_1012_Bin_233_Lokiarchaeota	Meg22_1012_Bin_233_scaffold_21_5_51	cab0097229fb9413053d08b7b0b056bd	115	Pfam	PF01984	Double-stranded DNA-binding domain	10	112	1.5e-21	T	23-07-2021	IPR002836	PDCD5-like
Meg22_1012_Bin_233_Lokiarchaeota	Meg22_1012_Bin_233_scaffold_21_5_51	cab0097229fb9413053d08b7b0b056bd	115	PANTHER	PTHR10840	PROGRAMMED CELL DEATH PROTEIN 5	3	113	3.6e-15	T	23-07-2021	IPR002836	PDCD5-like
Meg22_1012_Bin_233_Lokiarchaeota	Meg22_1012_Bin_233_scaffold_21_5_51	cab0097229fb9413053d08b7b0b056bd	115	Coils	Coil	Coil	18	38	-	T	23-07-2021	-	-
Meg22_1012_Bin_233_Lokiarchaeota	Meg22_1012_Bin_233_scaffold_21_5_51	cab0097229fb9413053d08b7b0b056bd	115	Gene3D	G3DSA:1.10.8.140	DNA Binding Protein	30	114	3.6e-23	T	23-07-2021	IPR036883	PDCD5-like superfamily
Meg22_1416_Bin_151_Lokiarchaeota	Meg22_1416_Bin_151_scaffold_440_15_30	cab0097229fb9413053d08b7b0b056bd	115	Coils	Coil	Coil	93	113	-	T	23-07-2021	-	-
Meg22_1416_Bin_151_Lokiarchaeota	Meg22_1416_Bin_151_scaffold_440_15_30	cab0097229fb9413053d08b7b0b056bd	115	PIRSF	PIRSF015730	TFAR19	1	115	7.1e-27	T	23-07-2021	IPR002836	PDCD5-like
Meg22_1416_Bin_151_Lokiarchaeota	Meg22_1416_Bin_151_scaffold_440_15_30	cab0097229fb9413053d08b7b0b056bd	115	SUPERFAMILY	SSF46950	Double-stranded DNA-binding domain	10	111	7.85e-23	T	23-07-2021	IPR036883	PDCD5-like superfamily
Meg22_1416_Bin_151_Lokiarchaeota	Meg22_1416_Bin_151_scaffold_440_15_30	cab0097229fb9413053d08b7b0b056bd	115	Pfam	PF01984	Double-stranded DNA-binding domain	10	112	1.5e-21	T	23-07-2021	IPR002836	PDCD5-like
Meg22_1416_Bin_151_Lokiarchaeota	Meg22_1416_Bin_151_scaffold_440_15_30	cab0097229fb9413053d08b7b0b056bd	115	PANTHER	PTHR10840	PROGRAMMED CELL DEATH PROTEIN 5	3	113	3.6e-15	T	23-07-2021	IPR002836	PDCD5-like
Meg22_1416_Bin_151_Lokiarchaeota	Meg22_1416_Bin_151_scaffold_440_15_30	cab0097229fb9413053d08b7b0b056bd	115	Coils	Coil	Coil	18	38	-	T	23-07-2021	-	-
Meg22_1416_Bin_151_Lokiarchaeota	Meg22_1416_Bin_151_scaffold_440_15_30	cab0097229fb9413053d08b7b0b056bd	115	Gene3D	G3DSA:1.10.8.140	DNA Binding Protein	30	114	3.6e-23	T	23-07-2021	IPR036883	PDCD5-like superfamily
Meg22_1214_Bin_191_Lokiarchaeota	Meg22_1214_Bin_191_scaffold_107_1_36	cab0097229fb9413053d08b7b0b056bd	115	Coils	Coil	Coil	93	113	-	T	23-07-2021	-	-
Meg22_1214_Bin_191_Lokiarchaeota	Meg22_1214_Bin_191_scaffold_107_1_36	cab0097229fb9413053d08b7b0b056bd	115	PIRSF	PIRSF015730	TFAR19	1	115	7.1e-27	T	23-07-2021	IPR002836	PDCD5-like
Meg22_1214_Bin_191_Lokiarchaeota	Meg22_1214_Bin_191_scaffold_107_1_36	cab0097229fb9413053d08b7b0b056bd	115	SUPERFAMILY	SSF46950	Double-stranded DNA-binding domain	10	111	7.85e-23	T	23-07-2021	IPR036883	PDCD5-like superfamily
Meg22_1214_Bin_191_Lokiarchaeota	Meg22_1214_Bin_191_scaffold_107_1_36	cab0097229fb9413053d08b7b0b056bd	115	Pfam	PF01984	Double-stranded DNA-binding domain	10	112	1.5e-21	T	23-07-2021	IPR002836	PDCD5-like
Meg22_1214_Bin_191_Lokiarchaeota	Meg22_1214_Bin_191_scaffold_107_1_36	cab0097229fb9413053d08b7b0b056bd	115	PANTHER	PTHR10840	PROGRAMMED CELL DEATH PROTEIN 5	3	113	3.6e-15	T	23-07-2021	IPR002836	PDCD5-like
Meg22_1214_Bin_191_Lokiarchaeota	Meg22_1214_Bin_191_scaffold_107_1_36	cab0097229fb9413053d08b7b0b056bd	115	Coils	Coil	Coil	18	38	-	T	23-07-2021	-	-
Meg22_1214_Bin_191_Lokiarchaeota	Meg22_1214_Bin_191_scaffold_107_1_36	cab0097229fb9413053d08b7b0b056bd	115	Gene3D	G3DSA:1.10.8.140	DNA Binding Protein	30	114	3.6e-23	T	23-07-2021	IPR036883	PDCD5-like superfamily
Meg22_1012_Bin_233_Lokiarchaeota	Meg22_1012_Bin_233_scaffold_412_18_14	3fcd0242dbc1ef08b5871cdabf3994ee	165	Gene3D	G3DSA:3.30.70.20	-	103	153	2.3e-05	T	23-07-2021	-	-
Meg22_1012_Bin_233_Lokiarchaeota	Meg22_1012_Bin_233_scaffold_412_18_14	3fcd0242dbc1ef08b5871cdabf3994ee	165	Pfam	PF00037	4Fe-4S binding domain	104	125	1.1e-05	T	23-07-2021	IPR017896	4Fe-4S ferredoxin-type, iron-sulphur binding domain
Meg22_1012_Bin_233_Lokiarchaeota	Meg22_1012_Bin_233_scaffold_412_18_14	3fcd0242dbc1ef08b5871cdabf3994ee	165	ProSitePatterns	PS00198	4Fe-4S ferredoxin-type iron-sulfur binding region signature.	109	120	-	T	23-07-2021	IPR017900	4Fe-4S ferredoxin, iron-sulphur binding, conserved site
Meg22_1012_Bin_233_Lokiarchaeota	Meg22_1012_Bin_233_scaffold_412_18_14	3fcd0242dbc1ef08b5871cdabf3994ee	165	SUPERFAMILY	SSF54862	4Fe-4S ferredoxins	101	131	5.02e-06	T	23-07-2021	-	-
Meg22_1012_Bin_233_Lokiarchaeota	Meg22_1012_Bin_233_scaffold_412_18_14	3fcd0242dbc1ef08b5871cdabf3994ee	165	SUPERFAMILY	SSF54862	4Fe-4S ferredoxins	45	126	9.21e-06	T	23-07-2021	-	-
Meg22_1012_Bin_233_Lokiarchaeota	Meg22_1012_Bin_233_scaffold_412_18_14	3fcd0242dbc1ef08b5871cdabf3994ee	165	ProSiteProfiles	PS51379	4Fe-4S ferredoxin-type iron-sulfur binding domain profile.	100	129	8.248	T	23-07-2021	IPR017896	4Fe-4S ferredoxin-type, iron-sulphur binding domain
Meg22_1214_Bin_191_Lokiarchaeota	Meg22_1214_Bin_191_scaffold_15607_80_3	3fcd0242dbc1ef08b5871cdabf3994ee	165	Gene3D	G3DSA:3.30.70.20	-	103	153	2.3e-05	T	23-07-2021	-	-
Meg22_1214_Bin_191_Lokiarchaeota	Meg22_1214_Bin_191_scaffold_15607_80_3	3fcd0242dbc1ef08b5871cdabf3994ee	165	Pfam	PF00037	4Fe-4S binding domain	104	125	1.1e-05	T	23-07-2021	IPR017896	4Fe-4S ferredoxin-type, iron-sulphur binding domain
Meg22_1214_Bin_191_Lokiarchaeota	Meg22_1214_Bin_191_scaffold_15607_80_3	3fcd0242dbc1ef08b5871cdabf3994ee	165	ProSitePatterns	PS00198	4Fe-4S ferredoxin-type iron-sulfur binding region signature.	109	120	-	T	23-07-2021	IPR017900	4Fe-4S ferredoxin, iron-sulphur binding, conserved site
Meg22_1214_Bin_191_Lokiarchaeota	Meg22_1214_Bin_191_scaffold_15607_80_3	3fcd0242dbc1ef08b5871cdabf3994ee	165	SUPERFAMILY	SSF54862	4Fe-4S ferredoxins	101	131	5.02e-06	T	23-07-2021	-	-
Meg22_1214_Bin_191_Lokiarchaeota	Meg22_1214_Bin_191_scaffold_15607_80_3	3fcd0242dbc1ef08b5871cdabf3994ee	165	SUPERFAMILY	SSF54862	4Fe-4S ferredoxins	45	126	9.21e-06	T	23-07-2021	-	-
Meg22_1214_Bin_191_Lokiarchaeota	Meg22_1214_Bin_191_scaffold_15607_80_3	3fcd0242dbc1ef08b5871cdabf3994ee	165	ProSiteProfiles	PS51379	4Fe-4S ferredoxin-type iron-sulfur binding domain profile.	100	129	8.248	T	23-07-2021	IPR017896	4Fe-4S ferredoxin-type, iron-sulphur binding domain
Meg22_1214_Bin_191_Lokiarchaeota	Meg22_1214_Bin_191_scaffold_128_2_27	69549c400405ed57d40dff43507e6c72	195	Pfam	PF02441	Flavoprotein	9	129	1.4e-19	T	23-07-2021	IPR003382	Flavoprotein
Meg22_1214_Bin_191_Lokiarchaeota	Meg22_1214_Bin_191_scaffold_128_2_27	69549c400405ed57d40dff43507e6c72	195	Gene3D	G3DSA:3.40.50.1950	-	5	193	6.2e-46	T	23-07-2021	IPR036551	Flavin prenyltransferase-like
Meg22_1214_Bin_191_Lokiarchaeota	Meg22_1214_Bin_191_scaffold_128_2_27	69549c400405ed57d40dff43507e6c72	195	PANTHER	PTHR14359:SF19	FLAVOPROTEIN	7	191	4.8e-54	T	23-07-2021	-	-
Meg22_1214_Bin_191_Lokiarchaeota	Meg22_1214_Bin_191_scaffold_128_2_27	69549c400405ed57d40dff43507e6c72	195	PANTHER	PTHR14359	HOMO-OLIGOMERIC FLAVIN CONTAINING CYS DECARBOXYLASE FAMILY	7	191	4.8e-54	T	23-07-2021	-	-
Meg22_1214_Bin_191_Lokiarchaeota	Meg22_1214_Bin_191_scaffold_128_2_27	69549c400405ed57d40dff43507e6c72	195	SUPERFAMILY	SSF52507	Homo-oligomeric flavin-containing Cys decarboxylases, HFCD	8	174	1.14e-23	T	23-07-2021	IPR036551	Flavin prenyltransferase-like
Meg22_1416_Bin_151_Lokiarchaeota	Meg22_1416_Bin_151_scaffold_243_6_27	69549c400405ed57d40dff43507e6c72	195	Pfam	PF02441	Flavoprotein	9	129	1.4e-19	T	23-07-2021	IPR003382	Flavoprotein
Meg22_1416_Bin_151_Lokiarchaeota	Meg22_1416_Bin_151_scaffold_243_6_27	69549c400405ed57d40dff43507e6c72	195	Gene3D	G3DSA:3.40.50.1950	-	5	193	6.2e-46	T	23-07-2021	IPR036551	Flavin prenyltransferase-like
Meg22_1416_Bin_151_Lokiarchaeota	Meg22_1416_Bin_151_scaffold_243_6_27	69549c400405ed57d40dff43507e6c72	195	PANTHER	PTHR14359:SF19	FLAVOPROTEIN	7	191	4.8e-54	T	23-07-2021	-	-
Meg22_1416_Bin_151_Lokiarchaeota	Meg22_1416_Bin_151_scaffold_243_6_27	69549c400405ed57d40dff43507e6c72	195	PANTHER	PTHR14359	HOMO-OLIGOMERIC FLAVIN CONTAINING CYS DECARBOXYLASE FAMILY	7	191	4.8e-54	T	23-07-2021	-	-
Meg22_1416_Bin_151_Lokiarchaeota	Meg22_1416_Bin_151_scaffold_243_6_27	69549c400405ed57d40dff43507e6c72	195	SUPERFAMILY	SSF52507	Homo-oligomeric flavin-containing Cys decarboxylases, HFCD	8	174	1.14e-23	T	23-07-2021	IPR036551	Flavin prenyltransferase-like
Meg22_1012_Bin_233_Lokiarchaeota	Meg22_1012_Bin_233_scaffold_6_2_91	69549c400405ed57d40dff43507e6c72	195	Pfam	PF02441	Flavoprotein	9	129	1.4e-19	T	23-07-2021	IPR003382	Flavoprotein
Meg22_1012_Bin_233_Lokiarchaeota	Meg22_1012_Bin_233_scaffold_6_2_91	69549c400405ed57d40dff43507e6c72	195	Gene3D	G3DSA:3.40.50.1950	-	5	193	6.2e-46	T	23-07-2021	IPR036551	Flavin prenyltransferase-like
Meg22_1012_Bin_233_Lokiarchaeota	Meg22_1012_Bin_233_scaffold_6_2_91	69549c400405ed57d40dff43507e6c72	195	PANTHER	PTHR14359:SF19	FLAVOPROTEIN	7	191	4.8e-54	T	23-07-2021	-	-
Meg22_1012_Bin_233_Lokiarchaeota	Meg22_1012_Bin_233_scaffold_6_2_91	69549c400405ed57d40dff43507e6c72	195	PANTHER	PTHR14359	HOMO-OLIGOMERIC FLAVIN CONTAINING CYS DECARBOXYLASE FAMILY	7	191	4.8e-54	T	23-07-2021	-	-
Meg22_1012_Bin_233_Lokiarchaeota	Meg22_1012_Bin_233_scaffold_6_2_91	69549c400405ed57d40dff43507e6c72	195	SUPERFAMILY	SSF52507	Homo-oligomeric flavin-containing Cys decarboxylases, HFCD	8	174	1.14e-23	T	23-07-2021	IPR036551	Flavin prenyltransferase-like
Meg19_1012_Bin_504_Helarchaeota	Meg19_1012_Bin_504_scaffold_23207_97_17	e2f42f8cc3627a8e36e684588e0538b4	460	Gene3D	G3DSA:3.40.50.1820	-	140	453	7.9e-40	T	23-07-2021	IPR029058	Alpha/Beta hydrolase fold
Meg19_1012_Bin_504_Helarchaeota	Meg19_1012_Bin_504_scaffold_23207_97_17	e2f42f8cc3627a8e36e684588e0538b4	460	Pfam	PF07859	alpha/beta hydrolase fold	267	434	9.6e-07	T	23-07-2021	IPR013094	Alpha/beta hydrolase fold-3
Meg19_1012_Bin_504_Helarchaeota	Meg19_1012_Bin_504_scaffold_23207_97_17	e2f42f8cc3627a8e36e684588e0538b4	460	PANTHER	PTHR48081:SF13	BLR7622 PROTEIN	150	455	2.5e-25	T	23-07-2021	-	-
Meg19_1012_Bin_504_Helarchaeota	Meg19_1012_Bin_504_scaffold_23207_97_17	e2f42f8cc3627a8e36e684588e0538b4	460	PANTHER	PTHR48081	AB HYDROLASE SUPERFAMILY PROTEIN C4A8.06C	150	455	2.5e-25	T	23-07-2021	-	-
Meg19_1012_Bin_504_Helarchaeota	Meg19_1012_Bin_504_scaffold_23207_97_17	e2f42f8cc3627a8e36e684588e0538b4	460	SUPERFAMILY	SSF53474	alpha/beta-Hydrolases	146	437	7.01e-32	T	23-07-2021	IPR029058	Alpha/Beta hydrolase fold
Meg22_1214_Bin_191_Lokiarchaeota	Meg22_1214_Bin_191_scaffold_750_11_83	c8e85919fdd6ae0e23489514373ceab1	434	Gene3D	G3DSA:3.30.70.3270	-	90	203	1.8e-08	T	23-07-2021	-	-
Meg22_1214_Bin_191_Lokiarchaeota	Meg22_1214_Bin_191_scaffold_750_11_83	c8e85919fdd6ae0e23489514373ceab1	434	Pfam	PF00037	4Fe-4S binding domain	102	120	0.00013	T	23-07-2021	IPR017896	4Fe-4S ferredoxin-type, iron-sulphur binding domain
Meg22_1214_Bin_191_Lokiarchaeota	Meg22_1214_Bin_191_scaffold_750_11_83	c8e85919fdd6ae0e23489514373ceab1	434	ProSiteProfiles	PS51379	4Fe-4S ferredoxin-type iron-sulfur binding domain profile.	99	128	8.701	T	23-07-2021	IPR017896	4Fe-4S ferredoxin-type, iron-sulphur binding domain
Meg22_1214_Bin_191_Lokiarchaeota	Meg22_1214_Bin_191_scaffold_750_11_83	c8e85919fdd6ae0e23489514373ceab1	434	Gene3D	G3DSA:3.50.50.60	-	5	83	5.1e-10	T	23-07-2021	IPR036188	FAD/NAD(P)-binding domain superfamily
Meg22_1214_Bin_191_Lokiarchaeota	Meg22_1214_Bin_191_scaffold_750_11_83	c8e85919fdd6ae0e23489514373ceab1	434	Gene3D	G3DSA:3.50.50.60	-	272	431	5.2e-11	T	23-07-2021	IPR036188	FAD/NAD(P)-binding domain superfamily
Meg22_1214_Bin_191_Lokiarchaeota	Meg22_1214_Bin_191_scaffold_750_11_83	c8e85919fdd6ae0e23489514373ceab1	434	SUPERFAMILY	SSF54862	4Fe-4S ferredoxins	90	186	2.13e-12	T	23-07-2021	-	-
Meg22_1214_Bin_191_Lokiarchaeota	Meg22_1214_Bin_191_scaffold_750_11_83	c8e85919fdd6ae0e23489514373ceab1	434	ProSitePatterns	PS00198	4Fe-4S ferredoxin-type iron-sulfur binding region signature.	108	119	-	T	23-07-2021	IPR017900	4Fe-4S ferredoxin, iron-sulphur binding, conserved site
Meg22_1214_Bin_191_Lokiarchaeota	Meg22_1214_Bin_191_scaffold_750_11_83	c8e85919fdd6ae0e23489514373ceab1	434	Pfam	PF07992	Pyridine nucleotide-disulphide oxidoreductase	8	101	1.7e-07	T	23-07-2021	IPR023753	FAD/NAD(P)-binding domain
Meg22_1214_Bin_191_Lokiarchaeota	Meg22_1214_Bin_191_scaffold_750_11_83	c8e85919fdd6ae0e23489514373ceab1	434	SUPERFAMILY	SSF51971	Nucleotide-binding domain	4	431	3.3e-29	T	23-07-2021	-	-
Meg22_1214_Bin_191_Lokiarchaeota	Meg22_1214_Bin_191_scaffold_750_11_83	c8e85919fdd6ae0e23489514373ceab1	434	PANTHER	PTHR43498	FERREDOXIN:COB-COM HETERODISULFIDE REDUCTASE SUBUNIT A	5	413	4.8e-30	T	23-07-2021	IPR039650	H(2):CoB-CoM heterodisulfide,ferredoxin reductase subunit A-like
Meg22_1214_Bin_191_Lokiarchaeota	Meg22_1214_Bin_191_scaffold_750_11_83	c8e85919fdd6ae0e23489514373ceab1	434	ProSiteProfiles	PS51379	4Fe-4S ferredoxin-type iron-sulfur binding domain profile.	146	180	6.366	T	23-07-2021	IPR017896	4Fe-4S ferredoxin-type, iron-sulphur binding domain
Meg22_1214_Bin_191_Lokiarchaeota	Meg22_1214_Bin_191_scaffold_750_11_83	c8e85919fdd6ae0e23489514373ceab1	434	Pfam	PF07992	Pyridine nucleotide-disulphide oxidoreductase	299	419	6.1e-08	T	23-07-2021	IPR023753	FAD/NAD(P)-binding domain
Meg22_1012_Bin_233_Lokiarchaeota	Meg22_1012_Bin_233_scaffold_23_6_84	c8e85919fdd6ae0e23489514373ceab1	434	Gene3D	G3DSA:3.30.70.3270	-	90	203	1.8e-08	T	23-07-2021	-	-
Meg22_1012_Bin_233_Lokiarchaeota	Meg22_1012_Bin_233_scaffold_23_6_84	c8e85919fdd6ae0e23489514373ceab1	434	Pfam	PF00037	4Fe-4S binding domain	102	120	0.00013	T	23-07-2021	IPR017896	4Fe-4S ferredoxin-type, iron-sulphur binding domain
Meg22_1012_Bin_233_Lokiarchaeota	Meg22_1012_Bin_233_scaffold_23_6_84	c8e85919fdd6ae0e23489514373ceab1	434	ProSiteProfiles	PS51379	4Fe-4S ferredoxin-type iron-sulfur binding domain profile.	99	128	8.701	T	23-07-2021	IPR017896	4Fe-4S ferredoxin-type, iron-sulphur binding domain
Meg22_1012_Bin_233_Lokiarchaeota	Meg22_1012_Bin_233_scaffold_23_6_84	c8e85919fdd6ae0e23489514373ceab1	434	Gene3D	G3DSA:3.50.50.60	-	5	83	5.1e-10	T	23-07-2021	IPR036188	FAD/NAD(P)-binding domain superfamily
Meg22_1012_Bin_233_Lokiarchaeota	Meg22_1012_Bin_233_scaffold_23_6_84	c8e85919fdd6ae0e23489514373ceab1	434	Gene3D	G3DSA:3.50.50.60	-	272	431	5.2e-11	T	23-07-2021	IPR036188	FAD/NAD(P)-binding domain superfamily
Meg22_1012_Bin_233_Lokiarchaeota	Meg22_1012_Bin_233_scaffold_23_6_84	c8e85919fdd6ae0e23489514373ceab1	434	SUPERFAMILY	SSF54862	4Fe-4S ferredoxins	90	186	2.13e-12	T	23-07-2021	-	-
Meg22_1012_Bin_233_Lokiarchaeota	Meg22_1012_Bin_233_scaffold_23_6_84	c8e85919fdd6ae0e23489514373ceab1	434	ProSitePatterns	PS00198	4Fe-4S ferredoxin-type iron-sulfur binding region signature.	108	119	-	T	23-07-2021	IPR017900	4Fe-4S ferredoxin, iron-sulphur binding, conserved site
Meg22_1012_Bin_233_Lokiarchaeota	Meg22_1012_Bin_233_scaffold_23_6_84	c8e85919fdd6ae0e23489514373ceab1	434	Pfam	PF07992	Pyridine nucleotide-disulphide oxidoreductase	8	101	1.7e-07	T	23-07-2021	IPR023753	FAD/NAD(P)-binding domain
Meg22_1012_Bin_233_Lokiarchaeota	Meg22_1012_Bin_233_scaffold_23_6_84	c8e85919fdd6ae0e23489514373ceab1	434	SUPERFAMILY	SSF51971	Nucleotide-binding domain	4	431	3.3e-29	T	23-07-2021	-	-
Meg22_1012_Bin_233_Lokiarchaeota	Meg22_1012_Bin_233_scaffold_23_6_84	c8e85919fdd6ae0e23489514373ceab1	434	PANTHER	PTHR43498	FERREDOXIN:COB-COM HETERODISULFIDE REDUCTASE SUBUNIT A	5	413	4.8e-30	T	23-07-2021	IPR039650	H(2):CoB-CoM heterodisulfide,ferredoxin reductase subunit A-like
Meg22_1012_Bin_233_Lokiarchaeota	Meg22_1012_Bin_233_scaffold_23_6_84	c8e85919fdd6ae0e23489514373ceab1	434	ProSiteProfiles	PS51379	4Fe-4S ferredoxin-type iron-sulfur binding domain profile.	146	180	6.366	T	23-07-2021	IPR017896	4Fe-4S ferredoxin-type, iron-sulphur binding domain
Meg22_1012_Bin_233_Lokiarchaeota	Meg22_1012_Bin_233_scaffold_23_6_84	c8e85919fdd6ae0e23489514373ceab1	434	Pfam	PF07992	Pyridine nucleotide-disulphide oxidoreductase	299	419	6.1e-08	T	23-07-2021	IPR023753	FAD/NAD(P)-binding domain
Meg22_1416_Bin_151_Lokiarchaeota	Meg22_1416_Bin_151_scaffold_235_5_52	c8e85919fdd6ae0e23489514373ceab1	434	Gene3D	G3DSA:3.30.70.3270	-	90	203	1.8e-08	T	23-07-2021	-	-
Meg22_1416_Bin_151_Lokiarchaeota	Meg22_1416_Bin_151_scaffold_235_5_52	c8e85919fdd6ae0e23489514373ceab1	434	Pfam	PF00037	4Fe-4S binding domain	102	120	0.00013	T	23-07-2021	IPR017896	4Fe-4S ferredoxin-type, iron-sulphur binding domain
Meg22_1416_Bin_151_Lokiarchaeota	Meg22_1416_Bin_151_scaffold_235_5_52	c8e85919fdd6ae0e23489514373ceab1	434	ProSiteProfiles	PS51379	4Fe-4S ferredoxin-type iron-sulfur binding domain profile.	99	128	8.701	T	23-07-2021	IPR017896	4Fe-4S ferredoxin-type, iron-sulphur binding domain
Meg22_1416_Bin_151_Lokiarchaeota	Meg22_1416_Bin_151_scaffold_235_5_52	c8e85919fdd6ae0e23489514373ceab1	434	Gene3D	G3DSA:3.50.50.60	-	5	83	5.1e-10	T	23-07-2021	IPR036188	FAD/NAD(P)-binding domain superfamily
Meg22_1416_Bin_151_Lokiarchaeota	Meg22_1416_Bin_151_scaffold_235_5_52	c8e85919fdd6ae0e23489514373ceab1	434	Gene3D	G3DSA:3.50.50.60	-	272	431	5.2e-11	T	23-07-2021	IPR036188	FAD/NAD(P)-binding domain superfamily
Meg22_1416_Bin_151_Lokiarchaeota	Meg22_1416_Bin_151_scaffold_235_5_52	c8e85919fdd6ae0e23489514373ceab1	434	SUPERFAMILY	SSF54862	4Fe-4S ferredoxins	90	186	2.13e-12	T	23-07-2021	-	-
Meg22_1416_Bin_151_Lokiarchaeota	Meg22_1416_Bin_151_scaffold_235_5_52	c8e85919fdd6ae0e23489514373ceab1	434	ProSitePatterns	PS00198	4Fe-4S ferredoxin-type iron-sulfur binding region signature.	108	119	-	T	23-07-2021	IPR017900	4Fe-4S ferredoxin, iron-sulphur binding, conserved site
Meg22_1416_Bin_151_Lokiarchaeota	Meg22_1416_Bin_151_scaffold_235_5_52	c8e85919fdd6ae0e23489514373ceab1	434	Pfam	PF07992	Pyridine nucleotide-disulphide oxidoreductase	8	101	1.7e-07	T	23-07-2021	IPR023753	FAD/NAD(P)-binding domain
Meg22_1416_Bin_151_Lokiarchaeota	Meg22_1416_Bin_151_scaffold_235_5_52	c8e85919fdd6ae0e23489514373ceab1	434	SUPERFAMILY	SSF51971	Nucleotide-binding domain	4	431	3.3e-29	T	23-07-2021	-	-
Meg22_1416_Bin_151_Lokiarchaeota	Meg22_1416_Bin_151_scaffold_235_5_52	c8e85919fdd6ae0e23489514373ceab1	434	PANTHER	PTHR43498	FERREDOXIN:COB-COM HETERODISULFIDE REDUCTASE SUBUNIT A	5	413	4.8e-30	T	23-07-2021	IPR039650	H(2):CoB-CoM heterodisulfide,ferredoxin reductase subunit A-like
Meg22_1416_Bin_151_Lokiarchaeota	Meg22_1416_Bin_151_scaffold_235_5_52	c8e85919fdd6ae0e23489514373ceab1	434	ProSiteProfiles	PS51379	4Fe-4S ferredoxin-type iron-sulfur binding domain profile.	146	180	6.366	T	23-07-2021	IPR017896	4Fe-4S ferredoxin-type, iron-sulphur binding domain
Meg22_1416_Bin_151_Lokiarchaeota	Meg22_1416_Bin_151_scaffold_235_5_52	c8e85919fdd6ae0e23489514373ceab1	434	Pfam	PF07992	Pyridine nucleotide-disulphide oxidoreductase	299	419	6.1e-08	T	23-07-2021	IPR023753	FAD/NAD(P)-binding domain
Meg22_1214_Bin_191_Lokiarchaeota	Meg22_1214_Bin_191_scaffold_217373_222_3	88dd93a4962c9f73a9fe9081801a4bc2	192	Coils	Coil	Coil	78	98	-	T	23-07-2021	-	-
Meg22_1214_Bin_191_Lokiarchaeota	Meg22_1214_Bin_191_scaffold_217373_222_3	88dd93a4962c9f73a9fe9081801a4bc2	192	Coils	Coil	Coil	159	179	-	T	23-07-2021	-	-
Meg22_1214_Bin_191_Lokiarchaeota	Meg22_1214_Bin_191_scaffold_217373_222_3	88dd93a4962c9f73a9fe9081801a4bc2	192	MobiDBLite	mobidb-lite	consensus disorder prediction	169	192	-	T	23-07-2021	-	-
Meg19_1012_Bin_504_Helarchaeota	Meg19_1012_Bin_504_scaffold_535_4_27	1cd557720740594403d3313e3da6f1e2	350	Gene3D	G3DSA:3.30.470.30	DNA ligase/mRNA capping enzyme	37	212	6.3e-28	T	23-07-2021	-	-
Meg19_1012_Bin_504_Helarchaeota	Meg19_1012_Bin_504_scaffold_535_4_27	1cd557720740594403d3313e3da6f1e2	350	SUPERFAMILY	SSF56091	DNA ligase/mRNA capping enzyme, catalytic domain	34	204	3.17e-19	T	23-07-2021	-	-
Meg19_1012_Bin_504_Helarchaeota	Meg19_1012_Bin_504_scaffold_535_4_27	1cd557720740594403d3313e3da6f1e2	350	Pfam	PF09414	RNA ligase	50	210	5.7e-09	T	23-07-2021	IPR021122	RNA ligase domain, REL/Rln2
Meg19_1012_Bin_504_Helarchaeota	Meg19_1012_Bin_504_scaffold_535_4_27	1cd557720740594403d3313e3da6f1e2	350	Coils	Coil	Coil	262	297	-	T	23-07-2021	-	-
Meg19_1012_Bin_504_Helarchaeota	Meg19_1012_Bin_504_scaffold_812_6_21	54260f0216c2a06c89612c09846031da	430	Gene3D	G3DSA:2.160.10.10	Hexapeptide repeat proteins	220	420	1.8e-44	T	23-07-2021	-	-
Meg19_1012_Bin_504_Helarchaeota	Meg19_1012_Bin_504_scaffold_812_6_21	54260f0216c2a06c89612c09846031da	430	CDD	cd04181	NTP_transferase	4	218	4.82288e-64	T	23-07-2021	-	-
Meg19_1012_Bin_504_Helarchaeota	Meg19_1012_Bin_504_scaffold_812_6_21	54260f0216c2a06c89612c09846031da	430	Pfam	PF00132	Bacterial transferase hexapeptide (six repeats)	277	311	9.3e-06	T	23-07-2021	IPR001451	Hexapeptide repeat
Meg19_1012_Bin_504_Helarchaeota	Meg19_1012_Bin_504_scaffold_812_6_21	54260f0216c2a06c89612c09846031da	430	Pfam	PF00132	Bacterial transferase hexapeptide (six repeats)	375	408	3.5e-05	T	23-07-2021	IPR001451	Hexapeptide repeat
Meg19_1012_Bin_504_Helarchaeota	Meg19_1012_Bin_504_scaffold_812_6_21	54260f0216c2a06c89612c09846031da	430	Pfam	PF00483	Nucleotidyl transferase	2	203	6.2e-40	T	23-07-2021	IPR005835	Nucleotidyl transferase domain
Meg19_1012_Bin_504_Helarchaeota	Meg19_1012_Bin_504_scaffold_812_6_21	54260f0216c2a06c89612c09846031da	430	SUPERFAMILY	SSF51161	Trimeric LpxA-like enzymes	235	419	1.43e-31	T	23-07-2021	IPR011004	Trimeric LpxA-like superfamily
Meg19_1012_Bin_504_Helarchaeota	Meg19_1012_Bin_504_scaffold_812_6_21	54260f0216c2a06c89612c09846031da	430	SUPERFAMILY	SSF53448	Nucleotide-diphospho-sugar transferases	1	316	8.34e-69	T	23-07-2021	IPR029044	Nucleotide-diphospho-sugar transferases
Meg19_1012_Bin_504_Helarchaeota	Meg19_1012_Bin_504_scaffold_812_6_21	54260f0216c2a06c89612c09846031da	430	TIGRFAM	TIGR03992	Arch_glmU: UDP-N-acetylglucosamine diphosphorylase/glucosamine-1-phosphate N-acetyltransferase	1	408	2.4e-97	T	23-07-2021	IPR023915	UDP-GlcNAc diphosphorylase/GlcNAc-1-P N-acetyltransferase, GlmU, archaeal-type
Meg19_1012_Bin_504_Helarchaeota	Meg19_1012_Bin_504_scaffold_812_6_21	54260f0216c2a06c89612c09846031da	430	Gene3D	G3DSA:3.90.550.10	Spore Coat Polysaccharide Biosynthesis Protein SpsA; Chain A	1	216	3.6e-52	T	23-07-2021	IPR029044	Nucleotide-diphospho-sugar transferases
Meg19_1012_Bin_504_Helarchaeota	Meg19_1012_Bin_504_scaffold_812_6_21	54260f0216c2a06c89612c09846031da	430	PANTHER	PTHR43584	NUCLEOTIDYL TRANSFERASE	1	407	1.8e-83	T	23-07-2021	-	-
Meg22_1012_Bin_233_Lokiarchaeota	Meg22_1012_Bin_233_scaffold_1758_31_15	db7922be945af61f57f77fce5338417c	261	Pfam	PF01398	JAB1/Mov34/MPN/PAD-1 ubiquitin protease	78	189	4.7e-12	T	23-07-2021	IPR000555	JAB1/MPN/MOV34 metalloenzyme domain
Meg22_1012_Bin_233_Lokiarchaeota	Meg22_1012_Bin_233_scaffold_1758_31_15	db7922be945af61f57f77fce5338417c	261	ProSiteProfiles	PS50249	MPN domain profile.	78	218	15.508	T	23-07-2021	IPR037518	MPN domain
Meg22_1012_Bin_233_Lokiarchaeota	Meg22_1012_Bin_233_scaffold_1758_31_15	db7922be945af61f57f77fce5338417c	261	Coils	Coil	Coil	137	157	-	T	23-07-2021	-	-
Meg22_1012_Bin_233_Lokiarchaeota	Meg22_1012_Bin_233_scaffold_1758_31_15	db7922be945af61f57f77fce5338417c	261	PANTHER	PTHR10410:SF6	COP9 SIGNALOSOME COMPLEX SUBUNIT 5	75	203	1.9e-15	T	23-07-2021	IPR037740	COP9 signalosome complex subunit 5
Meg22_1012_Bin_233_Lokiarchaeota	Meg22_1012_Bin_233_scaffold_1758_31_15	db7922be945af61f57f77fce5338417c	261	Coils	Coil	Coil	25	45	-	T	23-07-2021	-	-
Meg22_1012_Bin_233_Lokiarchaeota	Meg22_1012_Bin_233_scaffold_1758_31_15	db7922be945af61f57f77fce5338417c	261	Gene3D	G3DSA:3.40.140.10	Cytidine Deaminase	59	233	2e-29	T	23-07-2021	-	-
Meg22_1012_Bin_233_Lokiarchaeota	Meg22_1012_Bin_233_scaffold_1758_31_15	db7922be945af61f57f77fce5338417c	261	SMART	SM00232	pad1_6	77	218	1.9e-14	T	23-07-2021	IPR000555	JAB1/MPN/MOV34 metalloenzyme domain
Meg22_1012_Bin_233_Lokiarchaeota	Meg22_1012_Bin_233_scaffold_1758_31_15	db7922be945af61f57f77fce5338417c	261	PANTHER	PTHR10410	EUKARYOTIC TRANSLATION INITIATION FACTOR 3 -RELATED	75	203	1.9e-15	T	23-07-2021	-	-
Meg22_1012_Bin_233_Lokiarchaeota	Meg22_1012_Bin_233_scaffold_1758_31_15	db7922be945af61f57f77fce5338417c	261	SUPERFAMILY	SSF102712	JAB1/MPN domain	106	199	3.92e-15	T	23-07-2021	-	-
Meg19_1012_Bin_504_Helarchaeota	Meg19_1012_Bin_504_scaffold_5835_52_11	c12bcf1409d824aa8e47dc5464e22363	337	MobiDBLite	mobidb-lite	consensus disorder prediction	1	29	-	T	23-07-2021	-	-
Meg19_1012_Bin_504_Helarchaeota	Meg19_1012_Bin_504_scaffold_5835_52_11	c12bcf1409d824aa8e47dc5464e22363	337	Coils	Coil	Coil	29	328	-	T	23-07-2021	-	-
Meg22_1214_Bin_191_Lokiarchaeota	Meg22_1214_Bin_191_scaffold_1295_15_3	e95a774c39110916db4c5da7aefbc582	409	CDD	cd01563	Thr-synth_1	2	310	4.525e-109	T	23-07-2021	-	-
Meg22_1214_Bin_191_Lokiarchaeota	Meg22_1214_Bin_191_scaffold_1295_15_3	e95a774c39110916db4c5da7aefbc582	409	CDD	cd00090	HTH_ARSR	331	403	3.61677e-06	T	23-07-2021	IPR011991	ArsR-like helix-turn-helix domain
Meg22_1214_Bin_191_Lokiarchaeota	Meg22_1214_Bin_191_scaffold_1295_15_3	e95a774c39110916db4c5da7aefbc582	409	PANTHER	PTHR10314	CYSTATHIONINE BETA-SYNTHASE	4	312	9.7e-51	T	23-07-2021	-	-
Meg22_1214_Bin_191_Lokiarchaeota	Meg22_1214_Bin_191_scaffold_1295_15_3	e95a774c39110916db4c5da7aefbc582	409	SMART	SM00418	arsrmega2	325	407	0.00012	T	23-07-2021	IPR001845	HTH ArsR-type DNA-binding domain
Meg22_1214_Bin_191_Lokiarchaeota	Meg22_1214_Bin_191_scaffold_1295_15_3	e95a774c39110916db4c5da7aefbc582	409	Pfam	PF00291	Pyridoxal-phosphate dependent enzyme	2	305	3.2e-56	T	23-07-2021	IPR001926	Pyridoxal-phosphate dependent enzyme
Meg22_1214_Bin_191_Lokiarchaeota	Meg22_1214_Bin_191_scaffold_1295_15_3	e95a774c39110916db4c5da7aefbc582	409	Gene3D	G3DSA:3.40.50.1100	-	39	135	6.8e-95	T	23-07-2021	IPR036052	Tryptophan synthase beta subunit-like PLP-dependent enzyme
Meg22_1214_Bin_191_Lokiarchaeota	Meg22_1214_Bin_191_scaffold_1295_15_3	e95a774c39110916db4c5da7aefbc582	409	Gene3D	G3DSA:3.40.50.1100	-	2	311	6.8e-95	T	23-07-2021	IPR036052	Tryptophan synthase beta subunit-like PLP-dependent enzyme
Meg22_1214_Bin_191_Lokiarchaeota	Meg22_1214_Bin_191_scaffold_1295_15_3	e95a774c39110916db4c5da7aefbc582	409	SUPERFAMILY	SSF53686	Tryptophan synthase beta subunit-like PLP-dependent enzymes	2	319	8.38e-73	T	23-07-2021	IPR036052	Tryptophan synthase beta subunit-like PLP-dependent enzyme
Meg22_1214_Bin_191_Lokiarchaeota	Meg22_1214_Bin_191_scaffold_1295_15_3	e95a774c39110916db4c5da7aefbc582	409	SUPERFAMILY	SSF46785	Winged helix DNA-binding domain	332	399	6.02e-11	T	23-07-2021	IPR036390	Winged helix DNA-binding domain superfamily
Meg22_1214_Bin_191_Lokiarchaeota	Meg22_1214_Bin_191_scaffold_1295_15_3	e95a774c39110916db4c5da7aefbc582	409	PANTHER	PTHR10314:SF5	THREONINE SYNTHASE 1, CHLOROPLASTIC	4	312	9.7e-51	T	23-07-2021	-	-
Meg22_1214_Bin_191_Lokiarchaeota	Meg22_1214_Bin_191_scaffold_1295_15_3	e95a774c39110916db4c5da7aefbc582	409	Gene3D	G3DSA:1.10.10.10	winged helix"" repressor DNA binding domain	330	398	7.5e-09	T	23-07-2021	IPR036388	Winged helix-like DNA-binding domain superfamily
Meg22_1012_Bin_233_Lokiarchaeota	Meg22_1012_Bin_233_scaffold_1157_28_4	e95a774c39110916db4c5da7aefbc582	409	CDD	cd01563	Thr-synth_1	2	310	4.525e-109	T	23-07-2021	-	-
Meg22_1012_Bin_233_Lokiarchaeota	Meg22_1012_Bin_233_scaffold_1157_28_4	e95a774c39110916db4c5da7aefbc582	409	CDD	cd00090	HTH_ARSR	331	403	3.61677e-06	T	23-07-2021	IPR011991	ArsR-like helix-turn-helix domain
Meg22_1012_Bin_233_Lokiarchaeota	Meg22_1012_Bin_233_scaffold_1157_28_4	e95a774c39110916db4c5da7aefbc582	409	PANTHER	PTHR10314	CYSTATHIONINE BETA-SYNTHASE	4	312	9.7e-51	T	23-07-2021	-	-
Meg22_1012_Bin_233_Lokiarchaeota	Meg22_1012_Bin_233_scaffold_1157_28_4	e95a774c39110916db4c5da7aefbc582	409	SMART	SM00418	arsrmega2	325	407	0.00012	T	23-07-2021	IPR001845	HTH ArsR-type DNA-binding domain
Meg22_1012_Bin_233_Lokiarchaeota	Meg22_1012_Bin_233_scaffold_1157_28_4	e95a774c39110916db4c5da7aefbc582	409	Pfam	PF00291	Pyridoxal-phosphate dependent enzyme	2	305	3.2e-56	T	23-07-2021	IPR001926	Pyridoxal-phosphate dependent enzyme
Meg22_1012_Bin_233_Lokiarchaeota	Meg22_1012_Bin_233_scaffold_1157_28_4	e95a774c39110916db4c5da7aefbc582	409	Gene3D	G3DSA:3.40.50.1100	-	39	135	6.8e-95	T	23-07-2021	IPR036052	Tryptophan synthase beta subunit-like PLP-dependent enzyme
Meg22_1012_Bin_233_Lokiarchaeota	Meg22_1012_Bin_233_scaffold_1157_28_4	e95a774c39110916db4c5da7aefbc582	409	Gene3D	G3DSA:3.40.50.1100	-	2	311	6.8e-95	T	23-07-2021	IPR036052	Tryptophan synthase beta subunit-like PLP-dependent enzyme
Meg22_1012_Bin_233_Lokiarchaeota	Meg22_1012_Bin_233_scaffold_1157_28_4	e95a774c39110916db4c5da7aefbc582	409	SUPERFAMILY	SSF53686	Tryptophan synthase beta subunit-like PLP-dependent enzymes	2	319	8.38e-73	T	23-07-2021	IPR036052	Tryptophan synthase beta subunit-like PLP-dependent enzyme
Meg22_1012_Bin_233_Lokiarchaeota	Meg22_1012_Bin_233_scaffold_1157_28_4	e95a774c39110916db4c5da7aefbc582	409	SUPERFAMILY	SSF46785	Winged helix DNA-binding domain	332	399	6.02e-11	T	23-07-2021	IPR036390	Winged helix DNA-binding domain superfamily
Meg22_1012_Bin_233_Lokiarchaeota	Meg22_1012_Bin_233_scaffold_1157_28_4	e95a774c39110916db4c5da7aefbc582	409	PANTHER	PTHR10314:SF5	THREONINE SYNTHASE 1, CHLOROPLASTIC	4	312	9.7e-51	T	23-07-2021	-	-
Meg22_1012_Bin_233_Lokiarchaeota	Meg22_1012_Bin_233_scaffold_1157_28_4	e95a774c39110916db4c5da7aefbc582	409	Gene3D	G3DSA:1.10.10.10	winged helix"" repressor DNA binding domain	330	398	7.5e-09	T	23-07-2021	IPR036388	Winged helix-like DNA-binding domain superfamily
Meg19_1012_Bin_504_Helarchaeota	Meg19_1012_Bin_504_scaffold_1791_23_17	b6dc88c344745dab6ce2ee27631dcfde	296	SMART	SM00175	rab_sub_5	131	283	0.00092	T	23-07-2021	-	-
Meg19_1012_Bin_504_Helarchaeota	Meg19_1012_Bin_504_scaffold_1791_23_17	b6dc88c344745dab6ce2ee27631dcfde	296	TIGRFAM	TIGR00231	small_GTP: small GTP-binding protein domain	128	257	3e-16	T	23-07-2021	IPR005225	Small GTP-binding protein domain
Meg19_1012_Bin_504_Helarchaeota	Meg19_1012_Bin_504_scaffold_1791_23_17	b6dc88c344745dab6ce2ee27631dcfde	296	PANTHER	PTHR11711	ADP RIBOSYLATION FACTOR-RELATED	130	262	1.6e-19	T	23-07-2021	-	-
Meg19_1012_Bin_504_Helarchaeota	Meg19_1012_Bin_504_scaffold_1791_23_17	b6dc88c344745dab6ce2ee27631dcfde	296	SMART	SM00173	ras_sub_4	128	283	0.005	T	23-07-2021	-	-
Meg19_1012_Bin_504_Helarchaeota	Meg19_1012_Bin_504_scaffold_1791_23_17	b6dc88c344745dab6ce2ee27631dcfde	296	SUPERFAMILY	SSF52540	P-loop containing nucleoside triphosphate hydrolases	129	285	1.4e-26	T	23-07-2021	IPR027417	P-loop containing nucleoside triphosphate hydrolase
Meg19_1012_Bin_504_Helarchaeota	Meg19_1012_Bin_504_scaffold_1791_23_17	b6dc88c344745dab6ce2ee27631dcfde	296	PANTHER	PTHR11711:SF186	ADP RIBOSYLATION FACTOR-LIKE 4, ISOFORM B	130	262	1.6e-19	T	23-07-2021	-	-
Meg19_1012_Bin_504_Helarchaeota	Meg19_1012_Bin_504_scaffold_1791_23_17	b6dc88c344745dab6ce2ee27631dcfde	296	Gene3D	G3DSA:3.40.50.300	-	130	295	4.2e-28	T	23-07-2021	-	-
Meg19_1012_Bin_504_Helarchaeota	Meg19_1012_Bin_504_scaffold_1791_23_17	b6dc88c344745dab6ce2ee27631dcfde	296	SMART	SM00177	arf_sub_2	116	292	3.3e-05	T	23-07-2021	-	-
Meg19_1012_Bin_504_Helarchaeota	Meg19_1012_Bin_504_scaffold_1791_23_17	b6dc88c344745dab6ce2ee27631dcfde	296	Pfam	PF00025	ADP-ribosylation factor family	131	263	8.3e-19	T	23-07-2021	IPR006689	Small GTPase superfamily, ARF/SAR type
Meg19_1012_Bin_504_Helarchaeota	Meg19_1012_Bin_504_scaffold_1791_23_17	b6dc88c344745dab6ce2ee27631dcfde	296	PRINTS	PR00449	Transforming protein P21 ras signature	154	170	1.3e-08	T	23-07-2021	-	-
Meg19_1012_Bin_504_Helarchaeota	Meg19_1012_Bin_504_scaffold_1791_23_17	b6dc88c344745dab6ce2ee27631dcfde	296	PRINTS	PR00449	Transforming protein P21 ras signature	131	152	1.3e-08	T	23-07-2021	-	-
Meg19_1012_Bin_504_Helarchaeota	Meg19_1012_Bin_504_scaffold_1791_23_17	b6dc88c344745dab6ce2ee27631dcfde	296	PRINTS	PR00449	Transforming protein P21 ras signature	170	192	1.3e-08	T	23-07-2021	-	-
Meg19_1012_Bin_504_Helarchaeota	Meg19_1012_Bin_504_scaffold_1791_23_17	b6dc88c344745dab6ce2ee27631dcfde	296	PRINTS	PR00449	Transforming protein P21 ras signature	233	246	1.3e-08	T	23-07-2021	-	-
Meg22_1416_Bin_151_Lokiarchaeota	Meg22_1416_Bin_151_scaffold_437_14_46	593693be96ac958d2fb20ec5efe3eea1	396	Gene3D	G3DSA:3.30.1330.10	-	27	168	2.7e-53	T	23-07-2021	IPR036921	PurM-like, N-terminal domain superfamily
Meg22_1416_Bin_151_Lokiarchaeota	Meg22_1416_Bin_151_scaffold_437_14_46	593693be96ac958d2fb20ec5efe3eea1	396	SUPERFAMILY	SSF56042	PurM C-terminal domain-like	177	375	3.45e-26	T	23-07-2021	IPR036676	PurM-like, C-terminal domain superfamily
Meg22_1416_Bin_151_Lokiarchaeota	Meg22_1416_Bin_151_scaffold_437_14_46	593693be96ac958d2fb20ec5efe3eea1	396	SUPERFAMILY	SSF55326	PurM N-terminal domain-like	18	172	3.84e-13	T	23-07-2021	IPR036921	PurM-like, N-terminal domain superfamily
Meg22_1416_Bin_151_Lokiarchaeota	Meg22_1416_Bin_151_scaffold_437_14_46	593693be96ac958d2fb20ec5efe3eea1	396	Pfam	PF02769	AIR synthase related protein, C-terminal domain	182	373	7.6e-06	T	23-07-2021	IPR010918	PurM-like, C-terminal domain
Meg22_1416_Bin_151_Lokiarchaeota	Meg22_1416_Bin_151_scaffold_437_14_46	593693be96ac958d2fb20ec5efe3eea1	396	PANTHER	PTHR10520	TRIFUNCTIONAL PURINE BIOSYNTHETIC PROTEIN ADENOSINE-3-RELATED	4	380	2.8e-51	T	23-07-2021	IPR004733	Phosphoribosylformylglycinamidine cyclo-ligase
Meg22_1416_Bin_151_Lokiarchaeota	Meg22_1416_Bin_151_scaffold_437_14_46	593693be96ac958d2fb20ec5efe3eea1	396	Gene3D	G3DSA:3.90.650.10	-	170	391	1.8e-87	T	23-07-2021	IPR036676	PurM-like, C-terminal domain superfamily
Meg22_1012_Bin_233_Lokiarchaeota	Meg22_1012_Bin_233_scaffold_944_25_36	593693be96ac958d2fb20ec5efe3eea1	396	Gene3D	G3DSA:3.30.1330.10	-	27	168	2.7e-53	T	23-07-2021	IPR036921	PurM-like, N-terminal domain superfamily
Meg22_1012_Bin_233_Lokiarchaeota	Meg22_1012_Bin_233_scaffold_944_25_36	593693be96ac958d2fb20ec5efe3eea1	396	SUPERFAMILY	SSF56042	PurM C-terminal domain-like	177	375	3.45e-26	T	23-07-2021	IPR036676	PurM-like, C-terminal domain superfamily
Meg22_1012_Bin_233_Lokiarchaeota	Meg22_1012_Bin_233_scaffold_944_25_36	593693be96ac958d2fb20ec5efe3eea1	396	SUPERFAMILY	SSF55326	PurM N-terminal domain-like	18	172	3.84e-13	T	23-07-2021	IPR036921	PurM-like, N-terminal domain superfamily
Meg22_1012_Bin_233_Lokiarchaeota	Meg22_1012_Bin_233_scaffold_944_25_36	593693be96ac958d2fb20ec5efe3eea1	396	Pfam	PF02769	AIR synthase related protein, C-terminal domain	182	373	7.6e-06	T	23-07-2021	IPR010918	PurM-like, C-terminal domain
Meg22_1012_Bin_233_Lokiarchaeota	Meg22_1012_Bin_233_scaffold_944_25_36	593693be96ac958d2fb20ec5efe3eea1	396	PANTHER	PTHR10520	TRIFUNCTIONAL PURINE BIOSYNTHETIC PROTEIN ADENOSINE-3-RELATED	4	380	2.8e-51	T	23-07-2021	IPR004733	Phosphoribosylformylglycinamidine cyclo-ligase
Meg22_1012_Bin_233_Lokiarchaeota	Meg22_1012_Bin_233_scaffold_944_25_36	593693be96ac958d2fb20ec5efe3eea1	396	Gene3D	G3DSA:3.90.650.10	-	170	391	1.8e-87	T	23-07-2021	IPR036676	PurM-like, C-terminal domain superfamily
Meg22_1214_Bin_191_Lokiarchaeota	Meg22_1214_Bin_191_scaffold_3643_41_50	593693be96ac958d2fb20ec5efe3eea1	396	Gene3D	G3DSA:3.30.1330.10	-	27	168	2.7e-53	T	23-07-2021	IPR036921	PurM-like, N-terminal domain superfamily
Meg22_1214_Bin_191_Lokiarchaeota	Meg22_1214_Bin_191_scaffold_3643_41_50	593693be96ac958d2fb20ec5efe3eea1	396	SUPERFAMILY	SSF56042	PurM C-terminal domain-like	177	375	3.45e-26	T	23-07-2021	IPR036676	PurM-like, C-terminal domain superfamily
Meg22_1214_Bin_191_Lokiarchaeota	Meg22_1214_Bin_191_scaffold_3643_41_50	593693be96ac958d2fb20ec5efe3eea1	396	SUPERFAMILY	SSF55326	PurM N-terminal domain-like	18	172	3.84e-13	T	23-07-2021	IPR036921	PurM-like, N-terminal domain superfamily
Meg22_1214_Bin_191_Lokiarchaeota	Meg22_1214_Bin_191_scaffold_3643_41_50	593693be96ac958d2fb20ec5efe3eea1	396	Pfam	PF02769	AIR synthase related protein, C-terminal domain	182	373	7.6e-06	T	23-07-2021	IPR010918	PurM-like, C-terminal domain
Meg22_1214_Bin_191_Lokiarchaeota	Meg22_1214_Bin_191_scaffold_3643_41_50	593693be96ac958d2fb20ec5efe3eea1	396	PANTHER	PTHR10520	TRIFUNCTIONAL PURINE BIOSYNTHETIC PROTEIN ADENOSINE-3-RELATED	4	380	2.8e-51	T	23-07-2021	IPR004733	Phosphoribosylformylglycinamidine cyclo-ligase
Meg22_1214_Bin_191_Lokiarchaeota	Meg22_1214_Bin_191_scaffold_3643_41_50	593693be96ac958d2fb20ec5efe3eea1	396	Gene3D	G3DSA:3.90.650.10	-	170	391	1.8e-87	T	23-07-2021	IPR036676	PurM-like, C-terminal domain superfamily
Meg19_1012_Bin_504_Helarchaeota	Meg19_1012_Bin_504_scaffold_1096_13_36	b609081d057be1818a681b555887eef8	153	PANTHER	PTHR43437:SF3	HYDROXYACYL-THIOESTER DEHYDRATASE TYPE 2, MITOCHONDRIAL-RELATED	11	150	3.9e-23	T	23-07-2021	-	-
Meg19_1012_Bin_504_Helarchaeota	Meg19_1012_Bin_504_scaffold_1096_13_36	b609081d057be1818a681b555887eef8	153	SUPERFAMILY	SSF54637	Thioesterase/thiol ester dehydrase-isomerase	5	152	4.08e-37	T	23-07-2021	IPR029069	HotDog domain superfamily
Meg19_1012_Bin_504_Helarchaeota	Meg19_1012_Bin_504_scaffold_1096_13_36	b609081d057be1818a681b555887eef8	153	CDD	cd03449	R_hydratase	12	151	1.10388e-50	T	23-07-2021	-	-
Meg19_1012_Bin_504_Helarchaeota	Meg19_1012_Bin_504_scaffold_1096_13_36	b609081d057be1818a681b555887eef8	153	Pfam	PF01575	MaoC like domain	21	114	3.9e-22	T	23-07-2021	IPR002539	MaoC-like dehydratase domain
Meg19_1012_Bin_504_Helarchaeota	Meg19_1012_Bin_504_scaffold_1096_13_36	b609081d057be1818a681b555887eef8	153	PANTHER	PTHR43437	HYDROXYACYL-THIOESTER DEHYDRATASE TYPE 2, MITOCHONDRIAL-RELATED	11	150	3.9e-23	T	23-07-2021	-	-
Meg19_1012_Bin_504_Helarchaeota	Meg19_1012_Bin_504_scaffold_1096_13_36	b609081d057be1818a681b555887eef8	153	Gene3D	G3DSA:3.10.129.10	Hotdog Thioesterase	4	153	6.1e-40	T	23-07-2021	-	-
Meg22_1214_Bin_191_Lokiarchaeota	Meg22_1214_Bin_191_scaffold_13618_76_13	faed0c4683d44683c191d60a7d93a02b	89	Pfam	PF08241	Methyltransferase domain	5	53	1.2e-08	T	23-07-2021	IPR013216	Methyltransferase type 11
Meg22_1214_Bin_191_Lokiarchaeota	Meg22_1214_Bin_191_scaffold_13618_76_13	faed0c4683d44683c191d60a7d93a02b	89	Gene3D	G3DSA:3.40.50.150	Vaccinia Virus protein VP39	1	87	2.9e-13	T	23-07-2021	-	-
Meg22_1214_Bin_191_Lokiarchaeota	Meg22_1214_Bin_191_scaffold_13618_76_13	faed0c4683d44683c191d60a7d93a02b	89	SUPERFAMILY	SSF53335	S-adenosyl-L-methionine-dependent methyltransferases	4	84	1.41e-10	T	23-07-2021	IPR029063	S-adenosyl-L-methionine-dependent methyltransferase
Meg22_1416_Bin_151_Lokiarchaeota	Meg22_1416_Bin_151_scaffold_2722_54_23	fd67af1fcc46531bd850cf55a037ef74	486	Gene3D	G3DSA:1.20.1250.20	MFS general substrate transporter like domains	26	420	2.5e-25	T	23-07-2021	-	-
Meg22_1416_Bin_151_Lokiarchaeota	Meg22_1416_Bin_151_scaffold_2722_54_23	fd67af1fcc46531bd850cf55a037ef74	486	SUPERFAMILY	SSF103473	MFS general substrate transporter	32	473	1.31e-30	T	23-07-2021	IPR036259	MFS transporter superfamily
Meg22_1416_Bin_151_Lokiarchaeota	Meg22_1416_Bin_151_scaffold_2722_54_23	fd67af1fcc46531bd850cf55a037ef74	486	Pfam	PF13347	MFS/sugar transport protein	35	470	1.6e-53	T	23-07-2021	-	-
Meg22_1416_Bin_151_Lokiarchaeota	Meg22_1416_Bin_151_scaffold_2722_54_23	fd67af1fcc46531bd850cf55a037ef74	486	PANTHER	PTHR11328	MAJOR FACILITATOR SUPERFAMILY DOMAIN-CONTAINING PROTEIN	37	483	7.5e-41	T	23-07-2021	IPR039672	Lactose permease-like
Meg22_1214_Bin_191_Lokiarchaeota	Meg22_1214_Bin_191_scaffold_1513_20_31	fd67af1fcc46531bd850cf55a037ef74	486	Gene3D	G3DSA:1.20.1250.20	MFS general substrate transporter like domains	26	420	2.5e-25	T	23-07-2021	-	-
Meg22_1214_Bin_191_Lokiarchaeota	Meg22_1214_Bin_191_scaffold_1513_20_31	fd67af1fcc46531bd850cf55a037ef74	486	SUPERFAMILY	SSF103473	MFS general substrate transporter	32	473	1.31e-30	T	23-07-2021	IPR036259	MFS transporter superfamily
Meg22_1214_Bin_191_Lokiarchaeota	Meg22_1214_Bin_191_scaffold_1513_20_31	fd67af1fcc46531bd850cf55a037ef74	486	Pfam	PF13347	MFS/sugar transport protein	35	470	1.6e-53	T	23-07-2021	-	-
Meg22_1214_Bin_191_Lokiarchaeota	Meg22_1214_Bin_191_scaffold_1513_20_31	fd67af1fcc46531bd850cf55a037ef74	486	PANTHER	PTHR11328	MAJOR FACILITATOR SUPERFAMILY DOMAIN-CONTAINING PROTEIN	37	483	7.5e-41	T	23-07-2021	IPR039672	Lactose permease-like
Meg22_1012_Bin_233_Lokiarchaeota	Meg22_1012_Bin_233_scaffold_85_9_31	fd67af1fcc46531bd850cf55a037ef74	486	Gene3D	G3DSA:1.20.1250.20	MFS general substrate transporter like domains	26	420	2.5e-25	T	23-07-2021	-	-
Meg22_1012_Bin_233_Lokiarchaeota	Meg22_1012_Bin_233_scaffold_85_9_31	fd67af1fcc46531bd850cf55a037ef74	486	SUPERFAMILY	SSF103473	MFS general substrate transporter	32	473	1.31e-30	T	23-07-2021	IPR036259	MFS transporter superfamily
Meg22_1012_Bin_233_Lokiarchaeota	Meg22_1012_Bin_233_scaffold_85_9_31	fd67af1fcc46531bd850cf55a037ef74	486	Pfam	PF13347	MFS/sugar transport protein	35	470	1.6e-53	T	23-07-2021	-	-
Meg22_1012_Bin_233_Lokiarchaeota	Meg22_1012_Bin_233_scaffold_85_9_31	fd67af1fcc46531bd850cf55a037ef74	486	PANTHER	PTHR11328	MAJOR FACILITATOR SUPERFAMILY DOMAIN-CONTAINING PROTEIN	37	483	7.5e-41	T	23-07-2021	IPR039672	Lactose permease-like
Meg19_1012_Bin_504_Helarchaeota	Meg19_1012_Bin_504_scaffold_401_3_7	eac43d6921cc21d9ce8499b3339a3134	199	Pfam	PF04919	Protein of unknown function (DUF655)	11	192	6.5e-59	T	23-07-2021	IPR007003	Protein of unknown function DUF655
Meg19_1012_Bin_504_Helarchaeota	Meg19_1012_Bin_504_scaffold_401_3_7	eac43d6921cc21d9ce8499b3339a3134	199	PANTHER	PTHR40734	-	3	196	1.2e-60	T	23-07-2021	IPR007003	Protein of unknown function DUF655
Meg19_1012_Bin_504_Helarchaeota	Meg19_1012_Bin_504_scaffold_401_3_7	eac43d6921cc21d9ce8499b3339a3134	199	SUPERFAMILY	SSF160975	AF1531-like	11	192	2.62e-69	T	23-07-2021	-	-
Meg19_1012_Bin_504_Helarchaeota	Meg19_1012_Bin_504_scaffold_401_3_7	eac43d6921cc21d9ce8499b3339a3134	199	Gene3D	G3DSA:1.10.150.280	-	87	183	3.9e-35	T	23-07-2021	-	-
Meg19_1012_Bin_504_Helarchaeota	Meg19_1012_Bin_504_scaffold_401_3_7	eac43d6921cc21d9ce8499b3339a3134	199	Gene3D	G3DSA:2.40.50.140	-	11	86	1.7e-21	T	23-07-2021	-	-
Meg19_1012_Bin_504_Helarchaeota	Meg19_1012_Bin_504_scaffold_10785_70_10	3335d3f76bc646d442b3cdfd9040de77	388	Pfam	PF03577	Peptidase family C69	75	232	3.1e-09	T	23-07-2021	IPR005322	Peptidase C69, dipeptidase A
Meg19_1012_Bin_504_Helarchaeota	Meg19_1012_Bin_504_scaffold_10785_70_10	3335d3f76bc646d442b3cdfd9040de77	388	PANTHER	PTHR12994	SECERNIN	1	365	8.3e-121	T	23-07-2021	IPR005322	Peptidase C69, dipeptidase A
Meg22_1416_Bin_151_Lokiarchaeota	Meg22_1416_Bin_151_scaffold_1104_30_45	5b522262a7194916437f3228f6711cc0	400	PANTHER	PTHR11496	ALCOHOL DEHYDROGENASE	4	394	9.4e-108	T	23-07-2021	IPR039697	Iron-type alcohol dehydrogenase-like
Meg22_1416_Bin_151_Lokiarchaeota	Meg22_1416_Bin_151_scaffold_1104_30_45	5b522262a7194916437f3228f6711cc0	400	Gene3D	G3DSA:3.40.50.1970	-	1	183	2.4e-41	T	23-07-2021	-	-
Meg22_1416_Bin_151_Lokiarchaeota	Meg22_1416_Bin_151_scaffold_1104_30_45	5b522262a7194916437f3228f6711cc0	400	Pfam	PF00465	Iron-containing alcohol dehydrogenase	8	381	6.1e-100	T	23-07-2021	IPR001670	Alcohol dehydrogenase, iron-type/glycerol dehydrogenase GldA
Meg22_1416_Bin_151_Lokiarchaeota	Meg22_1416_Bin_151_scaffold_1104_30_45	5b522262a7194916437f3228f6711cc0	400	SUPERFAMILY	SSF56796	Dehydroquinate synthase-like	2	396	1.23e-105	T	23-07-2021	-	-
Meg22_1416_Bin_151_Lokiarchaeota	Meg22_1416_Bin_151_scaffold_1104_30_45	5b522262a7194916437f3228f6711cc0	400	Gene3D	G3DSA:1.20.1090.10	-	184	396	2.8e-61	T	23-07-2021	-	-
Meg22_1416_Bin_151_Lokiarchaeota	Meg22_1416_Bin_151_scaffold_1104_30_45	5b522262a7194916437f3228f6711cc0	400	ProSitePatterns	PS00913	Iron-containing alcohol dehydrogenases signature 1.	172	200	-	T	23-07-2021	IPR018211	Alcohol dehydrogenase, iron-type, conserved site
Meg22_1416_Bin_151_Lokiarchaeota	Meg22_1416_Bin_151_scaffold_1104_30_45	5b522262a7194916437f3228f6711cc0	400	CDD	cd14862	Fe-ADH-like	1	389	0	T	23-07-2021	-	-
Meg22_1416_Bin_151_Lokiarchaeota	Meg22_1416_Bin_151_scaffold_2212_46_8	8e4a78882b77413950cecd21cdca4e3f	513	PRINTS	PR00419	Adrenodoxin reductase family signature	2	24	1.5e-05	T	23-07-2021	-	-
Meg22_1416_Bin_151_Lokiarchaeota	Meg22_1416_Bin_151_scaffold_2212_46_8	8e4a78882b77413950cecd21cdca4e3f	513	PRINTS	PR00419	Adrenodoxin reductase family signature	25	38	1.5e-05	T	23-07-2021	-	-
Meg22_1416_Bin_151_Lokiarchaeota	Meg22_1416_Bin_151_scaffold_2212_46_8	8e4a78882b77413950cecd21cdca4e3f	513	PANTHER	PTHR46313	-	2	502	7.3e-50	T	23-07-2021	-	-
Meg22_1416_Bin_151_Lokiarchaeota	Meg22_1416_Bin_151_scaffold_2212_46_8	8e4a78882b77413950cecd21cdca4e3f	513	SUPERFAMILY	SSF51905	FAD/NAD(P)-binding domain	1	500	6.74e-46	T	23-07-2021	IPR036188	FAD/NAD(P)-binding domain superfamily
Meg22_1416_Bin_151_Lokiarchaeota	Meg22_1416_Bin_151_scaffold_2212_46_8	8e4a78882b77413950cecd21cdca4e3f	513	Pfam	PF01593	Flavin containing amine oxidoreductase	10	498	1.3e-23	T	23-07-2021	IPR002937	Amine oxidase
Meg22_1416_Bin_151_Lokiarchaeota	Meg22_1416_Bin_151_scaffold_2212_46_8	8e4a78882b77413950cecd21cdca4e3f	513	Gene3D	G3DSA:3.50.50.60	-	1	91	8.8e-18	T	23-07-2021	IPR036188	FAD/NAD(P)-binding domain superfamily
Meg22_1416_Bin_151_Lokiarchaeota	Meg22_1416_Bin_151_scaffold_2212_46_8	8e4a78882b77413950cecd21cdca4e3f	513	Gene3D	G3DSA:3.50.50.60	-	233	480	5.6e-16	T	23-07-2021	IPR036188	FAD/NAD(P)-binding domain superfamily
Meg22_1416_Bin_151_Lokiarchaeota	Meg22_1416_Bin_151_scaffold_2212_46_8	8e4a78882b77413950cecd21cdca4e3f	513	Gene3D	G3DSA:3.90.660.50	-	164	452	5.6e-16	T	23-07-2021	-	-
Meg22_1012_Bin_233_Lokiarchaeota	Meg22_1012_Bin_233_scaffold_580_20_23	e303233a6a5422d64a9172270b71b77a	330	PANTHER	PTHR10803	ARSENICAL PUMP-DRIVING ATPASE ARSENITE-TRANSLOCATING ATPASE	10	329	3.5e-94	T	23-07-2021	IPR016300	Arsenical pump ATPase, ArsA/GET3
Meg22_1012_Bin_233_Lokiarchaeota	Meg22_1012_Bin_233_scaffold_580_20_23	e303233a6a5422d64a9172270b71b77a	330	CDD	cd02035	ArsA	26	325	1.34005e-82	T	23-07-2021	-	-
Meg22_1012_Bin_233_Lokiarchaeota	Meg22_1012_Bin_233_scaffold_580_20_23	e303233a6a5422d64a9172270b71b77a	330	Pfam	PF02374	Anion-transporting ATPase	11	329	1.6e-86	T	23-07-2021	IPR025723	Anion-transporting ATPase-like domain
Meg22_1012_Bin_233_Lokiarchaeota	Meg22_1012_Bin_233_scaffold_580_20_23	e303233a6a5422d64a9172270b71b77a	330	TIGRFAM	TIGR00345	GET3_arsA_TRC40: transport-energizing ATPase, TRC40/GET3/ArsA family	14	328	1.4e-84	T	23-07-2021	IPR016300	Arsenical pump ATPase, ArsA/GET3
Meg22_1012_Bin_233_Lokiarchaeota	Meg22_1012_Bin_233_scaffold_580_20_23	e303233a6a5422d64a9172270b71b77a	330	Gene3D	G3DSA:3.40.50.300	-	2	330	1.6e-94	T	23-07-2021	-	-
Meg22_1012_Bin_233_Lokiarchaeota	Meg22_1012_Bin_233_scaffold_580_20_23	e303233a6a5422d64a9172270b71b77a	330	SUPERFAMILY	SSF52540	P-loop containing nucleoside triphosphate hydrolases	12	312	7.93e-45	T	23-07-2021	IPR027417	P-loop containing nucleoside triphosphate hydrolase
Meg22_1214_Bin_191_Lokiarchaeota	Meg22_1214_Bin_191_scaffold_6896_53_1	1f772332506d5dc58a2ad25c55365b09	160	PANTHER	PTHR43283	BETA-LACTAMASE-RELATED	3	96	4.6e-15	T	23-07-2021	-	-
Meg22_1214_Bin_191_Lokiarchaeota	Meg22_1214_Bin_191_scaffold_6896_53_1	1f772332506d5dc58a2ad25c55365b09	160	Gene3D	G3DSA:2.30.40.10	Urease	3	53	1.8e-33	T	23-07-2021	IPR011059	Metal-dependent hydrolase, composite domain superfamily
Meg22_1214_Bin_191_Lokiarchaeota	Meg22_1214_Bin_191_scaffold_6896_53_1	1f772332506d5dc58a2ad25c55365b09	160	SUPERFAMILY	SSF51556	Metallo-dependent hydrolases	55	160	1.75e-10	T	23-07-2021	IPR032466	Metal-dependent hydrolase
Meg22_1214_Bin_191_Lokiarchaeota	Meg22_1214_Bin_191_scaffold_6896_53_1	1f772332506d5dc58a2ad25c55365b09	160	Gene3D	G3DSA:3.20.20.140	-	54	160	1.8e-33	T	23-07-2021	-	-
Meg22_1214_Bin_191_Lokiarchaeota	Meg22_1214_Bin_191_scaffold_6896_53_1	1f772332506d5dc58a2ad25c55365b09	160	SUPERFAMILY	SSF51338	Composite domain of metallo-dependent hydrolases	1	68	3.17e-23	T	23-07-2021	IPR011059	Metal-dependent hydrolase, composite domain superfamily
Meg22_1214_Bin_191_Lokiarchaeota	Meg22_1214_Bin_191_scaffold_6896_53_1	1f772332506d5dc58a2ad25c55365b09	160	PANTHER	PTHR43283:SF9	D-AMINOACYLASE-RELATED	3	96	4.6e-15	T	23-07-2021	-	-
Meg22_1416_Bin_151_Lokiarchaeota	Meg22_1416_Bin_151_scaffold_1034_27_30	3942d380838166a5dfc0f719b318af4e	281	SUPERFAMILY	SSF51649	RuBisCo, C-terminal domain	112	273	2.09e-44	T	23-07-2021	IPR036376	Ribulose bisphosphate carboxylase, large subunit, C-terminal domain superfamily
Meg22_1416_Bin_151_Lokiarchaeota	Meg22_1416_Bin_151_scaffold_1034_27_30	3942d380838166a5dfc0f719b318af4e	281	SFLD	SFLDS00014	RuBisCO	6	275	0	T	23-07-2021	IPR033966	RuBisCO
Meg22_1416_Bin_151_Lokiarchaeota	Meg22_1416_Bin_151_scaffold_1034_27_30	3942d380838166a5dfc0f719b318af4e	281	PANTHER	PTHR42704	RIBULOSE BISPHOSPHATE CARBOXYLASE	57	272	1e-36	T	23-07-2021	IPR033966	RuBisCO
Meg22_1416_Bin_151_Lokiarchaeota	Meg22_1416_Bin_151_scaffold_1034_27_30	3942d380838166a5dfc0f719b318af4e	281	Gene3D	G3DSA:3.20.20.110	Rubisco	113	280	6.8e-56	T	23-07-2021	IPR036376	Ribulose bisphosphate carboxylase, large subunit, C-terminal domain superfamily
Meg22_1416_Bin_151_Lokiarchaeota	Meg22_1416_Bin_151_scaffold_1034_27_30	3942d380838166a5dfc0f719b318af4e	281	PANTHER	PTHR42704:SF9	RIBULOSE BISPHOSPHATE CARBOXYLASE LARGE CHAIN	57	272	1e-36	T	23-07-2021	-	-
Meg22_1416_Bin_151_Lokiarchaeota	Meg22_1416_Bin_151_scaffold_1034_27_30	3942d380838166a5dfc0f719b318af4e	281	Pfam	PF00016	Ribulose bisphosphate carboxylase large chain, catalytic domain	121	272	3.4e-23	T	23-07-2021	IPR000685	Ribulose bisphosphate carboxylase, large subunit, C-terminal
Meg22_1416_Bin_151_Lokiarchaeota	Meg22_1416_Bin_151_scaffold_1034_27_30	3942d380838166a5dfc0f719b318af4e	281	SFLD	SFLDG00301	RuBisCO-like proteins	6	275	0	T	23-07-2021	-	-
Meg22_1416_Bin_151_Lokiarchaeota	Meg22_1416_Bin_151_scaffold_1034_27_30	3942d380838166a5dfc0f719b318af4e	281	SUPERFAMILY	SSF54966	RuBisCO, large subunit, small (N-terminal) domain	5	112	6.54e-12	T	23-07-2021	IPR036422	RuBisCO large subunit, N-terminal domain superfamily
Meg22_1416_Bin_151_Lokiarchaeota	Meg22_1416_Bin_151_scaffold_1034_27_30	3942d380838166a5dfc0f719b318af4e	281	Gene3D	G3DSA:3.30.70.150	-	1	112	1.1e-35	T	23-07-2021	IPR036422	RuBisCO large subunit, N-terminal domain superfamily
Meg22_1416_Bin_151_Lokiarchaeota	Meg22_1416_Bin_151_scaffold_1298_33_19	18b140848a9b0a533643caf86113ce1e	152	Gene3D	G3DSA:3.30.300.20	-	12	148	7.4e-17	T	23-07-2021	IPR015946	K homology domain-like, alpha/beta
Meg22_1416_Bin_151_Lokiarchaeota	Meg22_1416_Bin_151_scaffold_1298_33_19	18b140848a9b0a533643caf86113ce1e	152	SUPERFAMILY	SSF82784	OsmC-like	12	149	3.53e-15	T	23-07-2021	IPR036102	OsmC/Ohr superfamily
Meg22_1416_Bin_151_Lokiarchaeota	Meg22_1416_Bin_151_scaffold_1298_33_19	18b140848a9b0a533643caf86113ce1e	152	Pfam	PF02566	OsmC-like protein	42	148	1.9e-08	T	23-07-2021	IPR003718	OsmC/Ohr family
Meg19_1012_Bin_504_Helarchaeota	Meg19_1012_Bin_504_scaffold_2392_30_5	87d8f3df1f09cb3da1254a99de693eb8	172	PANTHER	PTHR47227	DNA-DIRECTED RNA POLYMERASE SUBUNIT K	44	164	7.7e-21	T	23-07-2021	-	-
Meg19_1012_Bin_504_Helarchaeota	Meg19_1012_Bin_504_scaffold_2392_30_5	87d8f3df1f09cb3da1254a99de693eb8	172	Gene3D	G3DSA:3.90.940.10	-	39	164	2.6e-27	T	23-07-2021	IPR012293	RNA polymerase subunit, RPB6/omega
Meg19_1012_Bin_504_Helarchaeota	Meg19_1012_Bin_504_scaffold_2392_30_5	87d8f3df1f09cb3da1254a99de693eb8	172	MobiDBLite	mobidb-lite	consensus disorder prediction	1	38	-	T	23-07-2021	-	-
Meg19_1012_Bin_504_Helarchaeota	Meg19_1012_Bin_504_scaffold_2392_30_5	87d8f3df1f09cb3da1254a99de693eb8	172	PIRSF	PIRSF000778	RpoK/RPB6	29	165	8.2e-27	T	23-07-2021	IPR006111	Archaeal RpoK/eukaryotic RPB6 RNA polymerase subunit
Meg19_1012_Bin_504_Helarchaeota	Meg19_1012_Bin_504_scaffold_2392_30_5	87d8f3df1f09cb3da1254a99de693eb8	172	PIRSF	PIRSF000778	RpoK/RPB6	2	59	470	T	23-07-2021	IPR006111	Archaeal RpoK/eukaryotic RPB6 RNA polymerase subunit
Meg19_1012_Bin_504_Helarchaeota	Meg19_1012_Bin_504_scaffold_2392_30_5	87d8f3df1f09cb3da1254a99de693eb8	172	Coils	Coil	Coil	59	79	-	T	23-07-2021	-	-
Meg19_1012_Bin_504_Helarchaeota	Meg19_1012_Bin_504_scaffold_2392_30_5	87d8f3df1f09cb3da1254a99de693eb8	172	Coils	Coil	Coil	28	48	-	T	23-07-2021	-	-
Meg19_1012_Bin_504_Helarchaeota	Meg19_1012_Bin_504_scaffold_2392_30_5	87d8f3df1f09cb3da1254a99de693eb8	172	Pfam	PF01192	RNA polymerase Rpb6	92	144	6.5e-12	T	23-07-2021	IPR006110	RNA polymerase, subunit omega/K/RPB6
Meg19_1012_Bin_504_Helarchaeota	Meg19_1012_Bin_504_scaffold_2392_30_5	87d8f3df1f09cb3da1254a99de693eb8	172	SUPERFAMILY	SSF63562	RPB6/omega subunit-like	57	161	1.02e-23	T	23-07-2021	IPR036161	RPB6/omega subunit-like superfamily
Meg22_1012_Bin_233_Lokiarchaeota	Meg22_1012_Bin_233_scaffold_6_2_75	5ba3c088fd0fc841f51da9360c1a8cd4	179	PANTHER	PTHR43255	IRON-SULFUR-BINDING OXIDOREDUCTASE FADF-RELATED-RELATED	29	113	7.8e-20	T	23-07-2021	-	-
Meg22_1012_Bin_233_Lokiarchaeota	Meg22_1012_Bin_233_scaffold_6_2_75	5ba3c088fd0fc841f51da9360c1a8cd4	179	ProSitePatterns	PS00198	4Fe-4S ferredoxin-type iron-sulfur binding region signature.	79	90	-	T	23-07-2021	IPR017900	4Fe-4S ferredoxin, iron-sulphur binding, conserved site
Meg22_1012_Bin_233_Lokiarchaeota	Meg22_1012_Bin_233_scaffold_6_2_75	5ba3c088fd0fc841f51da9360c1a8cd4	179	Coils	Coil	Coil	174	179	-	T	23-07-2021	-	-
Meg22_1012_Bin_233_Lokiarchaeota	Meg22_1012_Bin_233_scaffold_6_2_75	5ba3c088fd0fc841f51da9360c1a8cd4	179	ProSiteProfiles	PS51379	4Fe-4S ferredoxin-type iron-sulfur binding domain profile.	25	56	7.962	T	23-07-2021	IPR017896	4Fe-4S ferredoxin-type, iron-sulphur binding domain
Meg22_1012_Bin_233_Lokiarchaeota	Meg22_1012_Bin_233_scaffold_6_2_75	5ba3c088fd0fc841f51da9360c1a8cd4	179	Gene3D	G3DSA:3.30.70.3270	-	10	104	1.3e-09	T	23-07-2021	-	-
Meg22_1012_Bin_233_Lokiarchaeota	Meg22_1012_Bin_233_scaffold_6_2_75	5ba3c088fd0fc841f51da9360c1a8cd4	179	PANTHER	PTHR43255:SF3	COB--COM HETERODISULFIDE REDUCTASE IRON-SULFUR SUBUNIT C 1	29	113	7.8e-20	T	23-07-2021	-	-
Meg22_1012_Bin_233_Lokiarchaeota	Meg22_1012_Bin_233_scaffold_6_2_75	5ba3c088fd0fc841f51da9360c1a8cd4	179	ProSitePatterns	PS00198	4Fe-4S ferredoxin-type iron-sulfur binding region signature.	36	47	-	T	23-07-2021	IPR017900	4Fe-4S ferredoxin, iron-sulphur binding, conserved site
Meg22_1012_Bin_233_Lokiarchaeota	Meg22_1012_Bin_233_scaffold_6_2_75	5ba3c088fd0fc841f51da9360c1a8cd4	179	ProSiteProfiles	PS51379	4Fe-4S ferredoxin-type iron-sulfur binding domain profile.	68	99	7.592	T	23-07-2021	IPR017896	4Fe-4S ferredoxin-type, iron-sulphur binding domain
Meg22_1012_Bin_233_Lokiarchaeota	Meg22_1012_Bin_233_scaffold_6_2_75	5ba3c088fd0fc841f51da9360c1a8cd4	179	SUPERFAMILY	SSF46548	alpha-helical ferredoxin	27	115	5.75e-12	T	23-07-2021	IPR009051	Alpha-helical ferredoxin
Meg22_1012_Bin_233_Lokiarchaeota	Meg22_1012_Bin_233_scaffold_6_2_75	5ba3c088fd0fc841f51da9360c1a8cd4	179	Pfam	PF13183	4Fe-4S dicluster domain	33	91	8.4e-10	T	23-07-2021	IPR017896	4Fe-4S ferredoxin-type, iron-sulphur binding domain
Meg22_1214_Bin_191_Lokiarchaeota	Meg22_1214_Bin_191_scaffold_128_2_11	5ba3c088fd0fc841f51da9360c1a8cd4	179	PANTHER	PTHR43255	IRON-SULFUR-BINDING OXIDOREDUCTASE FADF-RELATED-RELATED	29	113	7.8e-20	T	23-07-2021	-	-
Meg22_1214_Bin_191_Lokiarchaeota	Meg22_1214_Bin_191_scaffold_128_2_11	5ba3c088fd0fc841f51da9360c1a8cd4	179	ProSitePatterns	PS00198	4Fe-4S ferredoxin-type iron-sulfur binding region signature.	79	90	-	T	23-07-2021	IPR017900	4Fe-4S ferredoxin, iron-sulphur binding, conserved site
Meg22_1214_Bin_191_Lokiarchaeota	Meg22_1214_Bin_191_scaffold_128_2_11	5ba3c088fd0fc841f51da9360c1a8cd4	179	Coils	Coil	Coil	174	179	-	T	23-07-2021	-	-
Meg22_1214_Bin_191_Lokiarchaeota	Meg22_1214_Bin_191_scaffold_128_2_11	5ba3c088fd0fc841f51da9360c1a8cd4	179	ProSiteProfiles	PS51379	4Fe-4S ferredoxin-type iron-sulfur binding domain profile.	25	56	7.962	T	23-07-2021	IPR017896	4Fe-4S ferredoxin-type, iron-sulphur binding domain
Meg22_1214_Bin_191_Lokiarchaeota	Meg22_1214_Bin_191_scaffold_128_2_11	5ba3c088fd0fc841f51da9360c1a8cd4	179	Gene3D	G3DSA:3.30.70.3270	-	10	104	1.3e-09	T	23-07-2021	-	-
Meg22_1214_Bin_191_Lokiarchaeota	Meg22_1214_Bin_191_scaffold_128_2_11	5ba3c088fd0fc841f51da9360c1a8cd4	179	PANTHER	PTHR43255:SF3	COB--COM HETERODISULFIDE REDUCTASE IRON-SULFUR SUBUNIT C 1	29	113	7.8e-20	T	23-07-2021	-	-
Meg22_1214_Bin_191_Lokiarchaeota	Meg22_1214_Bin_191_scaffold_128_2_11	5ba3c088fd0fc841f51da9360c1a8cd4	179	ProSitePatterns	PS00198	4Fe-4S ferredoxin-type iron-sulfur binding region signature.	36	47	-	T	23-07-2021	IPR017900	4Fe-4S ferredoxin, iron-sulphur binding, conserved site
Meg22_1214_Bin_191_Lokiarchaeota	Meg22_1214_Bin_191_scaffold_128_2_11	5ba3c088fd0fc841f51da9360c1a8cd4	179	ProSiteProfiles	PS51379	4Fe-4S ferredoxin-type iron-sulfur binding domain profile.	68	99	7.592	T	23-07-2021	IPR017896	4Fe-4S ferredoxin-type, iron-sulphur binding domain
Meg22_1214_Bin_191_Lokiarchaeota	Meg22_1214_Bin_191_scaffold_128_2_11	5ba3c088fd0fc841f51da9360c1a8cd4	179	SUPERFAMILY	SSF46548	alpha-helical ferredoxin	27	115	5.75e-12	T	23-07-2021	IPR009051	Alpha-helical ferredoxin
Meg22_1214_Bin_191_Lokiarchaeota	Meg22_1214_Bin_191_scaffold_128_2_11	5ba3c088fd0fc841f51da9360c1a8cd4	179	Pfam	PF13183	4Fe-4S dicluster domain	33	91	8.4e-10	T	23-07-2021	IPR017896	4Fe-4S ferredoxin-type, iron-sulphur binding domain
Meg22_1416_Bin_151_Lokiarchaeota	Meg22_1416_Bin_151_scaffold_243_6_11	5ba3c088fd0fc841f51da9360c1a8cd4	179	PANTHER	PTHR43255	IRON-SULFUR-BINDING OXIDOREDUCTASE FADF-RELATED-RELATED	29	113	7.8e-20	T	23-07-2021	-	-
Meg22_1416_Bin_151_Lokiarchaeota	Meg22_1416_Bin_151_scaffold_243_6_11	5ba3c088fd0fc841f51da9360c1a8cd4	179	ProSitePatterns	PS00198	4Fe-4S ferredoxin-type iron-sulfur binding region signature.	79	90	-	T	23-07-2021	IPR017900	4Fe-4S ferredoxin, iron-sulphur binding, conserved site
Meg22_1416_Bin_151_Lokiarchaeota	Meg22_1416_Bin_151_scaffold_243_6_11	5ba3c088fd0fc841f51da9360c1a8cd4	179	Coils	Coil	Coil	174	179	-	T	23-07-2021	-	-
Meg22_1416_Bin_151_Lokiarchaeota	Meg22_1416_Bin_151_scaffold_243_6_11	5ba3c088fd0fc841f51da9360c1a8cd4	179	ProSiteProfiles	PS51379	4Fe-4S ferredoxin-type iron-sulfur binding domain profile.	25	56	7.962	T	23-07-2021	IPR017896	4Fe-4S ferredoxin-type, iron-sulphur binding domain
Meg22_1416_Bin_151_Lokiarchaeota	Meg22_1416_Bin_151_scaffold_243_6_11	5ba3c088fd0fc841f51da9360c1a8cd4	179	Gene3D	G3DSA:3.30.70.3270	-	10	104	1.3e-09	T	23-07-2021	-	-
Meg22_1416_Bin_151_Lokiarchaeota	Meg22_1416_Bin_151_scaffold_243_6_11	5ba3c088fd0fc841f51da9360c1a8cd4	179	PANTHER	PTHR43255:SF3	COB--COM HETERODISULFIDE REDUCTASE IRON-SULFUR SUBUNIT C 1	29	113	7.8e-20	T	23-07-2021	-	-
Meg22_1416_Bin_151_Lokiarchaeota	Meg22_1416_Bin_151_scaffold_243_6_11	5ba3c088fd0fc841f51da9360c1a8cd4	179	ProSitePatterns	PS00198	4Fe-4S ferredoxin-type iron-sulfur binding region signature.	36	47	-	T	23-07-2021	IPR017900	4Fe-4S ferredoxin, iron-sulphur binding, conserved site
Meg22_1416_Bin_151_Lokiarchaeota	Meg22_1416_Bin_151_scaffold_243_6_11	5ba3c088fd0fc841f51da9360c1a8cd4	179	ProSiteProfiles	PS51379	4Fe-4S ferredoxin-type iron-sulfur binding domain profile.	68	99	7.592	T	23-07-2021	IPR017896	4Fe-4S ferredoxin-type, iron-sulphur binding domain
Meg22_1416_Bin_151_Lokiarchaeota	Meg22_1416_Bin_151_scaffold_243_6_11	5ba3c088fd0fc841f51da9360c1a8cd4	179	SUPERFAMILY	SSF46548	alpha-helical ferredoxin	27	115	5.75e-12	T	23-07-2021	IPR009051	Alpha-helical ferredoxin
Meg22_1416_Bin_151_Lokiarchaeota	Meg22_1416_Bin_151_scaffold_243_6_11	5ba3c088fd0fc841f51da9360c1a8cd4	179	Pfam	PF13183	4Fe-4S dicluster domain	33	91	8.4e-10	T	23-07-2021	IPR017896	4Fe-4S ferredoxin-type, iron-sulphur binding domain
Meg19_1012_Bin_504_Helarchaeota	Meg19_1012_Bin_504_scaffold_367_1_38	6097172647a1f778c6bbe8cd001fda89	195	Pfam	PF00132	Bacterial transferase hexapeptide (six repeats)	39	61	0.00027	T	23-07-2021	IPR001451	Hexapeptide repeat
Meg19_1012_Bin_504_Helarchaeota	Meg19_1012_Bin_504_scaffold_367_1_38	6097172647a1f778c6bbe8cd001fda89	195	Pfam	PF00132	Bacterial transferase hexapeptide (six repeats)	7	32	0.0012	T	23-07-2021	IPR001451	Hexapeptide repeat
Meg19_1012_Bin_504_Helarchaeota	Meg19_1012_Bin_504_scaffold_367_1_38	6097172647a1f778c6bbe8cd001fda89	195	Pfam	PF00132	Bacterial transferase hexapeptide (six repeats)	142	175	1.8e-08	T	23-07-2021	IPR001451	Hexapeptide repeat
Meg19_1012_Bin_504_Helarchaeota	Meg19_1012_Bin_504_scaffold_367_1_38	6097172647a1f778c6bbe8cd001fda89	195	Pfam	PF00132	Bacterial transferase hexapeptide (six repeats)	74	107	1e-06	T	23-07-2021	IPR001451	Hexapeptide repeat
Meg19_1012_Bin_504_Helarchaeota	Meg19_1012_Bin_504_scaffold_367_1_38	6097172647a1f778c6bbe8cd001fda89	195	CDD	cd03358	LbH_WxcM_N_like	76	192	2.16141e-47	T	23-07-2021	-	-
Meg19_1012_Bin_504_Helarchaeota	Meg19_1012_Bin_504_scaffold_367_1_38	6097172647a1f778c6bbe8cd001fda89	195	Gene3D	G3DSA:2.160.10.10	Hexapeptide repeat proteins	1	191	9.7e-52	T	23-07-2021	-	-
Meg19_1012_Bin_504_Helarchaeota	Meg19_1012_Bin_504_scaffold_367_1_38	6097172647a1f778c6bbe8cd001fda89	195	PANTHER	PTHR43300:SF1	UDP-2-ACETAMIDO-3-AMINO-2,3-DIDEOXY-D-GLUCURONATE N-ACETYLTRANSFERASE	44	192	1.6e-36	T	23-07-2021	-	-
Meg19_1012_Bin_504_Helarchaeota	Meg19_1012_Bin_504_scaffold_367_1_38	6097172647a1f778c6bbe8cd001fda89	195	ProSitePatterns	PS00101	Hexapeptide-repeat containing-transferases signature.	149	177	-	T	23-07-2021	IPR018357	Hexapeptide transferase, conserved site
Meg19_1012_Bin_504_Helarchaeota	Meg19_1012_Bin_504_scaffold_367_1_38	6097172647a1f778c6bbe8cd001fda89	195	SUPERFAMILY	SSF51161	Trimeric LpxA-like enzymes	3	194	1.26e-40	T	23-07-2021	IPR011004	Trimeric LpxA-like superfamily
Meg19_1012_Bin_504_Helarchaeota	Meg19_1012_Bin_504_scaffold_367_1_38	6097172647a1f778c6bbe8cd001fda89	195	PANTHER	PTHR43300	ACETYLTRANSFERASE	44	192	1.6e-36	T	23-07-2021	-	-
Meg19_1012_Bin_504_Helarchaeota	Meg19_1012_Bin_504_scaffold_9957_62_16	f79f7bad5329e844b4fae4a2654bdc9a	431	Pfam	PF03417	Acyl-coenzyme A:6-aminopenicillanic acid acyl-transferase	153	364	1.3e-12	T	23-07-2021	IPR005079	Peptidase C45
Meg19_1012_Bin_504_Helarchaeota	Meg19_1012_Bin_504_scaffold_9957_62_16	f79f7bad5329e844b4fae4a2654bdc9a	431	Gene3D	G3DSA:3.60.60.10	Penicillin V Acylase; Chain A	121	379	8.9e-30	T	23-07-2021	-	-
Meg19_1012_Bin_504_Helarchaeota	Meg19_1012_Bin_504_scaffold_9957_62_16	f79f7bad5329e844b4fae4a2654bdc9a	431	PANTHER	PTHR34180	PEPTIDASE C45	49	343	1.6e-16	T	23-07-2021	-	-
Meg22_1416_Bin_151_Lokiarchaeota	Meg22_1416_Bin_151_scaffold_58833_150_4	3d97f29e431c4067d109c9086654a5b9	80	Coils	Coil	Coil	33	53	-	T	23-07-2021	-	-
Meg22_1214_Bin_191_Lokiarchaeota	Meg22_1214_Bin_191_scaffold_204652_219_3	cb86c5d2caf767f5e7bfbda99ccd8a28	86	PANTHER	PTHR43283	BETA-LACTAMASE-RELATED	1	81	1.9e-24	T	23-07-2021	-	-
Meg22_1214_Bin_191_Lokiarchaeota	Meg22_1214_Bin_191_scaffold_204652_219_3	cb86c5d2caf767f5e7bfbda99ccd8a28	86	Gene3D	G3DSA:2.30.40.10	Urease	1	85	8.7e-10	T	23-07-2021	IPR011059	Metal-dependent hydrolase, composite domain superfamily
Meg22_1214_Bin_191_Lokiarchaeota	Meg22_1214_Bin_191_scaffold_204652_219_3	cb86c5d2caf767f5e7bfbda99ccd8a28	86	PANTHER	PTHR43283:SF9	D-AMINOACYLASE-RELATED	1	81	1.9e-24	T	23-07-2021	-	-
Meg22_1214_Bin_191_Lokiarchaeota	Meg22_1214_Bin_191_scaffold_204652_219_3	cb86c5d2caf767f5e7bfbda99ccd8a28	86	Pfam	PF07969	Amidohydrolase family	1	64	3.5e-12	T	23-07-2021	IPR013108	Amidohydrolase 3
Meg22_1214_Bin_191_Lokiarchaeota	Meg22_1214_Bin_191_scaffold_204652_219_3	cb86c5d2caf767f5e7bfbda99ccd8a28	86	SUPERFAMILY	SSF51338	Composite domain of metallo-dependent hydrolases	22	80	3.11e-14	T	23-07-2021	IPR011059	Metal-dependent hydrolase, composite domain superfamily
Meg19_1012_Bin_504_Helarchaeota	Meg19_1012_Bin_504_scaffold_2750_35_8	82382e819631e19947e904ca1760b599	274	SUPERFAMILY	SSF50249	Nucleic acid-binding proteins	101	168	6.61e-10	T	23-07-2021	IPR012340	Nucleic acid-binding, OB-fold
Meg19_1012_Bin_504_Helarchaeota	Meg19_1012_Bin_504_scaffold_2750_35_8	82382e819631e19947e904ca1760b599	274	Gene3D	G3DSA:3.40.1280.10	-	5	270	6.9e-79	T	23-07-2021	IPR029026	tRNA (guanine-N1-)-methyltransferase, N-terminal
Meg19_1012_Bin_504_Helarchaeota	Meg19_1012_Bin_504_scaffold_2750_35_8	82382e819631e19947e904ca1760b599	274	CDD	cd18086	HsC9orf114-like	2	269	1.46887e-49	T	23-07-2021	IPR003750	Putative RNA methyltransferase
Meg19_1012_Bin_504_Helarchaeota	Meg19_1012_Bin_504_scaffold_2750_35_8	82382e819631e19947e904ca1760b599	274	PANTHER	PTHR12150	CLASS IV SAM-BINDING METHYLTRANSFERASE-RELATED	2	270	4.2e-60	T	23-07-2021	IPR003750	Putative RNA methyltransferase
Meg19_1012_Bin_504_Helarchaeota	Meg19_1012_Bin_504_scaffold_2750_35_8	82382e819631e19947e904ca1760b599	274	Gene3D	G3DSA:2.40.50.140	-	92	162	6.9e-79	T	23-07-2021	-	-
Meg19_1012_Bin_504_Helarchaeota	Meg19_1012_Bin_504_scaffold_2750_35_8	82382e819631e19947e904ca1760b599	274	Pfam	PF02598	Putative RNA methyltransferase	3	268	9.4e-68	T	23-07-2021	IPR003750	Putative RNA methyltransferase
Meg19_1012_Bin_504_Helarchaeota	Meg19_1012_Bin_504_scaffold_2750_35_8	82382e819631e19947e904ca1760b599	274	SUPERFAMILY	SSF75217	alpha/beta knot	2	271	3.01e-43	T	23-07-2021	IPR029028	Alpha/beta knot methyltransferases
Meg19_1012_Bin_504_Helarchaeota	Meg19_1012_Bin_504_scaffold_4119_44_12	c44d9152796f0b3282944d1c7565af2a	305	PANTHER	PTHR42282	PANTOATE KINASE-RELATED	3	293	1.2e-58	T	23-07-2021	IPR012043	Pantoate kinase
Meg19_1012_Bin_504_Helarchaeota	Meg19_1012_Bin_504_scaffold_4119_44_12	c44d9152796f0b3282944d1c7565af2a	305	Pfam	PF00288	GHMP kinases N terminal domain	93	152	2.3e-05	T	23-07-2021	IPR006204	GHMP kinase N-terminal domain
Meg19_1012_Bin_504_Helarchaeota	Meg19_1012_Bin_504_scaffold_4119_44_12	c44d9152796f0b3282944d1c7565af2a	305	PIRSF	PIRSF016896	GHMP_arc_MJ0969	2	295	1.6e-60	T	23-07-2021	IPR012043	Pantoate kinase
Meg19_1012_Bin_504_Helarchaeota	Meg19_1012_Bin_504_scaffold_4119_44_12	c44d9152796f0b3282944d1c7565af2a	305	Hamap	MF_02223	Pantoate kinase.	5	287	32.721	T	23-07-2021	IPR012043	Pantoate kinase
Meg19_1012_Bin_504_Helarchaeota	Meg19_1012_Bin_504_scaffold_4119_44_12	c44d9152796f0b3282944d1c7565af2a	305	SUPERFAMILY	SSF54211	Ribosomal protein S5 domain 2-like	5	158	5.84e-12	T	23-07-2021	IPR020568	Ribosomal protein S5 domain 2-type fold
Meg19_1012_Bin_504_Helarchaeota	Meg19_1012_Bin_504_scaffold_4119_44_12	c44d9152796f0b3282944d1c7565af2a	305	Gene3D	G3DSA:3.30.230.10	-	28	160	1.7e-12	T	23-07-2021	IPR014721	Ribosomal protein S5 domain 2-type fold, subgroup
Meg19_1012_Bin_504_Helarchaeota	Meg19_1012_Bin_504_scaffold_62842_126_7	400c740ffaa7cb4aeb2d5cea198a3a3a	84	MobiDBLite	mobidb-lite	consensus disorder prediction	56	71	-	T	23-07-2021	-	-
Meg19_1012_Bin_504_Helarchaeota	Meg19_1012_Bin_504_scaffold_62842_126_7	400c740ffaa7cb4aeb2d5cea198a3a3a	84	Coils	Coil	Coil	44	68	-	T	23-07-2021	-	-
Meg19_1012_Bin_504_Helarchaeota	Meg19_1012_Bin_504_scaffold_62842_126_7	400c740ffaa7cb4aeb2d5cea198a3a3a	84	Coils	Coil	Coil	13	34	-	T	23-07-2021	-	-
Meg19_1012_Bin_504_Helarchaeota	Meg19_1012_Bin_504_scaffold_62842_126_7	400c740ffaa7cb4aeb2d5cea198a3a3a	84	MobiDBLite	mobidb-lite	consensus disorder prediction	56	84	-	T	23-07-2021	-	-
Meg22_1012_Bin_233_Lokiarchaeota	Meg22_1012_Bin_233_scaffold_505_19_21	8fac42fb56830232fab16dc865b6b047	320	PANTHER	PTHR11101:SF80	PHOSPHATE TRANSPORTER	165	313	4.9e-59	T	23-07-2021	-	-
Meg22_1012_Bin_233_Lokiarchaeota	Meg22_1012_Bin_233_scaffold_505_19_21	8fac42fb56830232fab16dc865b6b047	320	PANTHER	PTHR11101:SF80	PHOSPHATE TRANSPORTER	3	155	4.9e-59	T	23-07-2021	-	-
Meg22_1012_Bin_233_Lokiarchaeota	Meg22_1012_Bin_233_scaffold_505_19_21	8fac42fb56830232fab16dc865b6b047	320	PANTHER	PTHR11101	PHOSPHATE TRANSPORTER	165	313	4.9e-59	T	23-07-2021	IPR001204	Phosphate transporter
Meg22_1012_Bin_233_Lokiarchaeota	Meg22_1012_Bin_233_scaffold_505_19_21	8fac42fb56830232fab16dc865b6b047	320	Pfam	PF01384	Phosphate transporter family	18	308	1.2e-58	T	23-07-2021	IPR001204	Phosphate transporter
Meg22_1012_Bin_233_Lokiarchaeota	Meg22_1012_Bin_233_scaffold_505_19_21	8fac42fb56830232fab16dc865b6b047	320	PANTHER	PTHR11101	PHOSPHATE TRANSPORTER	3	155	4.9e-59	T	23-07-2021	IPR001204	Phosphate transporter
Meg22_1214_Bin_191_Lokiarchaeota	Meg22_1214_Bin_191_scaffold_3994_42_21	8fac42fb56830232fab16dc865b6b047	320	PANTHER	PTHR11101:SF80	PHOSPHATE TRANSPORTER	165	313	4.9e-59	T	23-07-2021	-	-
Meg22_1214_Bin_191_Lokiarchaeota	Meg22_1214_Bin_191_scaffold_3994_42_21	8fac42fb56830232fab16dc865b6b047	320	PANTHER	PTHR11101:SF80	PHOSPHATE TRANSPORTER	3	155	4.9e-59	T	23-07-2021	-	-
Meg22_1214_Bin_191_Lokiarchaeota	Meg22_1214_Bin_191_scaffold_3994_42_21	8fac42fb56830232fab16dc865b6b047	320	PANTHER	PTHR11101	PHOSPHATE TRANSPORTER	165	313	4.9e-59	T	23-07-2021	IPR001204	Phosphate transporter
Meg22_1214_Bin_191_Lokiarchaeota	Meg22_1214_Bin_191_scaffold_3994_42_21	8fac42fb56830232fab16dc865b6b047	320	Pfam	PF01384	Phosphate transporter family	18	308	1.2e-58	T	23-07-2021	IPR001204	Phosphate transporter
Meg22_1214_Bin_191_Lokiarchaeota	Meg22_1214_Bin_191_scaffold_3994_42_21	8fac42fb56830232fab16dc865b6b047	320	PANTHER	PTHR11101	PHOSPHATE TRANSPORTER	3	155	4.9e-59	T	23-07-2021	IPR001204	Phosphate transporter
Meg22_1012_Bin_233_Lokiarchaeota	Meg22_1012_Bin_233_scaffold_106562_80_3	04c9e5cfaf2eca1844ba2b4f18b85a0d	450	PANTHER	PTHR33252	THIRD ORF IN TRANSPOSON ISC1160	105	283	4.5e-18	T	23-07-2021	-	-
Meg22_1012_Bin_233_Lokiarchaeota	Meg22_1012_Bin_233_scaffold_106562_80_3	04c9e5cfaf2eca1844ba2b4f18b85a0d	450	PANTHER	PTHR33252	THIRD ORF IN TRANSPOSON ISC1160	344	402	4.5e-18	T	23-07-2021	-	-
Meg19_1012_Bin_504_Helarchaeota	Meg19_1012_Bin_504_scaffold_1096_13_14	3c0cf990fe8a6ea7748a41307141b24c	636	Coils	Coil	Coil	518	559	-	T	23-07-2021	-	-
Meg19_1012_Bin_504_Helarchaeota	Meg19_1012_Bin_504_scaffold_1096_13_14	3c0cf990fe8a6ea7748a41307141b24c	636	Coils	Coil	Coil	574	594	-	T	23-07-2021	-	-
Meg19_1012_Bin_504_Helarchaeota	Meg19_1012_Bin_504_scaffold_1096_13_14	3c0cf990fe8a6ea7748a41307141b24c	636	Coils	Coil	Coil	610	630	-	T	23-07-2021	-	-
Meg19_1012_Bin_504_Helarchaeota	Meg19_1012_Bin_504_scaffold_16518_85_10	3c069c480afd1aa9b8012e6855c5d375	143	SUPERFAMILY	SSF46785	Winged helix DNA-binding domain	17	99	1.8e-06	T	23-07-2021	IPR036390	Winged helix DNA-binding domain superfamily
Meg19_1012_Bin_504_Helarchaeota	Meg19_1012_Bin_504_scaffold_16518_85_10	3c069c480afd1aa9b8012e6855c5d375	143	Coils	Coil	Coil	85	118	-	T	23-07-2021	-	-
Meg19_1012_Bin_504_Helarchaeota	Meg19_1012_Bin_504_scaffold_16518_85_10	3c069c480afd1aa9b8012e6855c5d375	143	Gene3D	G3DSA:1.10.10.10	winged helix"" repressor DNA binding domain	6	88	8.7e-06	T	23-07-2021	IPR036388	Winged helix-like DNA-binding domain superfamily
Meg22_1012_Bin_233_Lokiarchaeota	Meg22_1012_Bin_233_scaffold_2120_34_10	f91bb577db0fa255b53ebe8acb6ff751	465	Pfam	PF07992	Pyridine nucleotide-disulphide oxidoreductase	4	316	5.1e-52	T	23-07-2021	IPR023753	FAD/NAD(P)-binding domain
Meg22_1012_Bin_233_Lokiarchaeota	Meg22_1012_Bin_233_scaffold_2120_34_10	f91bb577db0fa255b53ebe8acb6ff751	465	SUPERFAMILY	SSF55424	FAD/NAD-linked reductases, dimerisation (C-terminal) domain	337	463	2.41e-35	T	23-07-2021	IPR016156	FAD/NAD-linked reductase, dimerisation domain superfamily
Meg22_1012_Bin_233_Lokiarchaeota	Meg22_1012_Bin_233_scaffold_2120_34_10	f91bb577db0fa255b53ebe8acb6ff751	465	TIGRFAM	TIGR02053	MerA: mercury(II) reductase	3	465	4.7e-154	T	23-07-2021	IPR021179	Mercury(II) reductase
Meg22_1012_Bin_233_Lokiarchaeota	Meg22_1012_Bin_233_scaffold_2120_34_10	f91bb577db0fa255b53ebe8acb6ff751	465	ProSitePatterns	PS00076	Pyridine nucleotide-disulphide oxidoreductases class-I active site.	39	49	-	T	23-07-2021	IPR012999	Pyridine nucleotide-disulphide oxidoreductase, class I, active site
Meg22_1012_Bin_233_Lokiarchaeota	Meg22_1012_Bin_233_scaffold_2120_34_10	f91bb577db0fa255b53ebe8acb6ff751	465	Gene3D	G3DSA:3.50.50.60	-	6	325	6.2e-88	T	23-07-2021	IPR036188	FAD/NAD(P)-binding domain superfamily
Meg22_1012_Bin_233_Lokiarchaeota	Meg22_1012_Bin_233_scaffold_2120_34_10	f91bb577db0fa255b53ebe8acb6ff751	465	Pfam	PF02852	Pyridine nucleotide-disulphide oxidoreductase, dimerisation domain	341	449	2.6e-31	T	23-07-2021	IPR004099	Pyridine nucleotide-disulphide oxidoreductase, dimerisation domain
Meg22_1012_Bin_233_Lokiarchaeota	Meg22_1012_Bin_233_scaffold_2120_34_10	f91bb577db0fa255b53ebe8acb6ff751	465	Gene3D	G3DSA:3.30.390.30	-	340	465	5.2e-41	T	23-07-2021	IPR016156	FAD/NAD-linked reductase, dimerisation domain superfamily
Meg22_1012_Bin_233_Lokiarchaeota	Meg22_1012_Bin_233_scaffold_2120_34_10	f91bb577db0fa255b53ebe8acb6ff751	465	Gene3D	G3DSA:3.50.50.60	-	144	265	6.2e-88	T	23-07-2021	IPR036188	FAD/NAD(P)-binding domain superfamily
Meg22_1012_Bin_233_Lokiarchaeota	Meg22_1012_Bin_233_scaffold_2120_34_10	f91bb577db0fa255b53ebe8acb6ff751	465	SUPERFAMILY	SSF51905	FAD/NAD(P)-binding domain	1	312	1.58e-42	T	23-07-2021	IPR036188	FAD/NAD(P)-binding domain superfamily
Meg22_1012_Bin_233_Lokiarchaeota	Meg22_1012_Bin_233_scaffold_2120_34_10	f91bb577db0fa255b53ebe8acb6ff751	465	PRINTS	PR00411	Pyridine nucleotide disulphide reductase class-I signature	38	53	8.8e-58	T	23-07-2021	-	-
Meg22_1012_Bin_233_Lokiarchaeota	Meg22_1012_Bin_233_scaffold_2120_34_10	f91bb577db0fa255b53ebe8acb6ff751	465	PRINTS	PR00411	Pyridine nucleotide disulphide reductase class-I signature	424	444	8.8e-58	T	23-07-2021	-	-
Meg22_1012_Bin_233_Lokiarchaeota	Meg22_1012_Bin_233_scaffold_2120_34_10	f91bb577db0fa255b53ebe8acb6ff751	465	PRINTS	PR00411	Pyridine nucleotide disulphide reductase class-I signature	171	196	8.8e-58	T	23-07-2021	-	-
Meg22_1012_Bin_233_Lokiarchaeota	Meg22_1012_Bin_233_scaffold_2120_34_10	f91bb577db0fa255b53ebe8acb6ff751	465	PRINTS	PR00411	Pyridine nucleotide disulphide reductase class-I signature	259	273	8.8e-58	T	23-07-2021	-	-
Meg22_1012_Bin_233_Lokiarchaeota	Meg22_1012_Bin_233_scaffold_2120_34_10	f91bb577db0fa255b53ebe8acb6ff751	465	PRINTS	PR00411	Pyridine nucleotide disulphide reductase class-I signature	402	417	8.8e-58	T	23-07-2021	-	-
Meg22_1012_Bin_233_Lokiarchaeota	Meg22_1012_Bin_233_scaffold_2120_34_10	f91bb577db0fa255b53ebe8acb6ff751	465	PRINTS	PR00411	Pyridine nucleotide disulphide reductase class-I signature	337	358	8.8e-58	T	23-07-2021	-	-
Meg22_1012_Bin_233_Lokiarchaeota	Meg22_1012_Bin_233_scaffold_2120_34_10	f91bb577db0fa255b53ebe8acb6ff751	465	PRINTS	PR00411	Pyridine nucleotide disulphide reductase class-I signature	4	26	8.8e-58	T	23-07-2021	-	-
Meg22_1012_Bin_233_Lokiarchaeota	Meg22_1012_Bin_233_scaffold_2120_34_10	f91bb577db0fa255b53ebe8acb6ff751	465	PRINTS	PR00411	Pyridine nucleotide disulphide reductase class-I signature	301	308	8.8e-58	T	23-07-2021	-	-
Meg22_1012_Bin_233_Lokiarchaeota	Meg22_1012_Bin_233_scaffold_2120_34_10	f91bb577db0fa255b53ebe8acb6ff751	465	PRINTS	PR00411	Pyridine nucleotide disulphide reductase class-I signature	135	144	8.8e-58	T	23-07-2021	-	-
Meg22_1012_Bin_233_Lokiarchaeota	Meg22_1012_Bin_233_scaffold_2120_34_10	f91bb577db0fa255b53ebe8acb6ff751	465	PRINTS	PR00368	FAD-dependent pyridine nucleotide reductase signature	5	24	7e-21	T	23-07-2021	-	-
Meg22_1012_Bin_233_Lokiarchaeota	Meg22_1012_Bin_233_scaffold_2120_34_10	f91bb577db0fa255b53ebe8acb6ff751	465	PRINTS	PR00368	FAD-dependent pyridine nucleotide reductase signature	171	189	7e-21	T	23-07-2021	-	-
Meg22_1012_Bin_233_Lokiarchaeota	Meg22_1012_Bin_233_scaffold_2120_34_10	f91bb577db0fa255b53ebe8acb6ff751	465	PRINTS	PR00368	FAD-dependent pyridine nucleotide reductase signature	286	308	7e-21	T	23-07-2021	-	-
Meg22_1012_Bin_233_Lokiarchaeota	Meg22_1012_Bin_233_scaffold_2120_34_10	f91bb577db0fa255b53ebe8acb6ff751	465	PRINTS	PR00368	FAD-dependent pyridine nucleotide reductase signature	132	150	7e-21	T	23-07-2021	-	-
Meg22_1012_Bin_233_Lokiarchaeota	Meg22_1012_Bin_233_scaffold_2120_34_10	f91bb577db0fa255b53ebe8acb6ff751	465	PRINTS	PR00368	FAD-dependent pyridine nucleotide reductase signature	258	274	7e-21	T	23-07-2021	-	-
Meg22_1012_Bin_233_Lokiarchaeota	Meg22_1012_Bin_233_scaffold_2120_34_10	f91bb577db0fa255b53ebe8acb6ff751	465	PANTHER	PTHR43014	MERCURIC REDUCTASE	2	460	1.3e-116	T	23-07-2021	-	-
Meg22_1012_Bin_233_Lokiarchaeota	Meg22_1012_Bin_233_scaffold_2120_34_10	f91bb577db0fa255b53ebe8acb6ff751	465	PIRSF	PIRSF000350	Hg-II_reductase_MerA	1	465	3.7e-118	T	23-07-2021	IPR001100	Pyridine nucleotide-disulphide oxidoreductase, class I
Meg22_1214_Bin_191_Lokiarchaeota	Meg22_1214_Bin_191_scaffold_6924_55_10	f91bb577db0fa255b53ebe8acb6ff751	465	Pfam	PF07992	Pyridine nucleotide-disulphide oxidoreductase	4	316	5.1e-52	T	23-07-2021	IPR023753	FAD/NAD(P)-binding domain
Meg22_1214_Bin_191_Lokiarchaeota	Meg22_1214_Bin_191_scaffold_6924_55_10	f91bb577db0fa255b53ebe8acb6ff751	465	SUPERFAMILY	SSF55424	FAD/NAD-linked reductases, dimerisation (C-terminal) domain	337	463	2.41e-35	T	23-07-2021	IPR016156	FAD/NAD-linked reductase, dimerisation domain superfamily
Meg22_1214_Bin_191_Lokiarchaeota	Meg22_1214_Bin_191_scaffold_6924_55_10	f91bb577db0fa255b53ebe8acb6ff751	465	TIGRFAM	TIGR02053	MerA: mercury(II) reductase	3	465	4.7e-154	T	23-07-2021	IPR021179	Mercury(II) reductase
Meg22_1214_Bin_191_Lokiarchaeota	Meg22_1214_Bin_191_scaffold_6924_55_10	f91bb577db0fa255b53ebe8acb6ff751	465	ProSitePatterns	PS00076	Pyridine nucleotide-disulphide oxidoreductases class-I active site.	39	49	-	T	23-07-2021	IPR012999	Pyridine nucleotide-disulphide oxidoreductase, class I, active site
Meg22_1214_Bin_191_Lokiarchaeota	Meg22_1214_Bin_191_scaffold_6924_55_10	f91bb577db0fa255b53ebe8acb6ff751	465	Gene3D	G3DSA:3.50.50.60	-	6	325	6.2e-88	T	23-07-2021	IPR036188	FAD/NAD(P)-binding domain superfamily
Meg22_1214_Bin_191_Lokiarchaeota	Meg22_1214_Bin_191_scaffold_6924_55_10	f91bb577db0fa255b53ebe8acb6ff751	465	Pfam	PF02852	Pyridine nucleotide-disulphide oxidoreductase, dimerisation domain	341	449	2.6e-31	T	23-07-2021	IPR004099	Pyridine nucleotide-disulphide oxidoreductase, dimerisation domain
Meg22_1214_Bin_191_Lokiarchaeota	Meg22_1214_Bin_191_scaffold_6924_55_10	f91bb577db0fa255b53ebe8acb6ff751	465	Gene3D	G3DSA:3.30.390.30	-	340	465	5.2e-41	T	23-07-2021	IPR016156	FAD/NAD-linked reductase, dimerisation domain superfamily
Meg22_1214_Bin_191_Lokiarchaeota	Meg22_1214_Bin_191_scaffold_6924_55_10	f91bb577db0fa255b53ebe8acb6ff751	465	Gene3D	G3DSA:3.50.50.60	-	144	265	6.2e-88	T	23-07-2021	IPR036188	FAD/NAD(P)-binding domain superfamily
Meg22_1214_Bin_191_Lokiarchaeota	Meg22_1214_Bin_191_scaffold_6924_55_10	f91bb577db0fa255b53ebe8acb6ff751	465	SUPERFAMILY	SSF51905	FAD/NAD(P)-binding domain	1	312	1.58e-42	T	23-07-2021	IPR036188	FAD/NAD(P)-binding domain superfamily
Meg22_1214_Bin_191_Lokiarchaeota	Meg22_1214_Bin_191_scaffold_6924_55_10	f91bb577db0fa255b53ebe8acb6ff751	465	PRINTS	PR00411	Pyridine nucleotide disulphide reductase class-I signature	38	53	8.8e-58	T	23-07-2021	-	-
Meg22_1214_Bin_191_Lokiarchaeota	Meg22_1214_Bin_191_scaffold_6924_55_10	f91bb577db0fa255b53ebe8acb6ff751	465	PRINTS	PR00411	Pyridine nucleotide disulphide reductase class-I signature	424	444	8.8e-58	T	23-07-2021	-	-
Meg22_1214_Bin_191_Lokiarchaeota	Meg22_1214_Bin_191_scaffold_6924_55_10	f91bb577db0fa255b53ebe8acb6ff751	465	PRINTS	PR00411	Pyridine nucleotide disulphide reductase class-I signature	171	196	8.8e-58	T	23-07-2021	-	-
Meg22_1214_Bin_191_Lokiarchaeota	Meg22_1214_Bin_191_scaffold_6924_55_10	f91bb577db0fa255b53ebe8acb6ff751	465	PRINTS	PR00411	Pyridine nucleotide disulphide reductase class-I signature	259	273	8.8e-58	T	23-07-2021	-	-
Meg22_1214_Bin_191_Lokiarchaeota	Meg22_1214_Bin_191_scaffold_6924_55_10	f91bb577db0fa255b53ebe8acb6ff751	465	PRINTS	PR00411	Pyridine nucleotide disulphide reductase class-I signature	402	417	8.8e-58	T	23-07-2021	-	-
Meg22_1214_Bin_191_Lokiarchaeota	Meg22_1214_Bin_191_scaffold_6924_55_10	f91bb577db0fa255b53ebe8acb6ff751	465	PRINTS	PR00411	Pyridine nucleotide disulphide reductase class-I signature	337	358	8.8e-58	T	23-07-2021	-	-
Meg22_1214_Bin_191_Lokiarchaeota	Meg22_1214_Bin_191_scaffold_6924_55_10	f91bb577db0fa255b53ebe8acb6ff751	465	PRINTS	PR00411	Pyridine nucleotide disulphide reductase class-I signature	4	26	8.8e-58	T	23-07-2021	-	-
Meg22_1214_Bin_191_Lokiarchaeota	Meg22_1214_Bin_191_scaffold_6924_55_10	f91bb577db0fa255b53ebe8acb6ff751	465	PRINTS	PR00411	Pyridine nucleotide disulphide reductase class-I signature	301	308	8.8e-58	T	23-07-2021	-	-
Meg22_1214_Bin_191_Lokiarchaeota	Meg22_1214_Bin_191_scaffold_6924_55_10	f91bb577db0fa255b53ebe8acb6ff751	465	PRINTS	PR00411	Pyridine nucleotide disulphide reductase class-I signature	135	144	8.8e-58	T	23-07-2021	-	-
Meg22_1214_Bin_191_Lokiarchaeota	Meg22_1214_Bin_191_scaffold_6924_55_10	f91bb577db0fa255b53ebe8acb6ff751	465	PRINTS	PR00368	FAD-dependent pyridine nucleotide reductase signature	5	24	7e-21	T	23-07-2021	-	-
Meg22_1214_Bin_191_Lokiarchaeota	Meg22_1214_Bin_191_scaffold_6924_55_10	f91bb577db0fa255b53ebe8acb6ff751	465	PRINTS	PR00368	FAD-dependent pyridine nucleotide reductase signature	171	189	7e-21	T	23-07-2021	-	-
Meg22_1214_Bin_191_Lokiarchaeota	Meg22_1214_Bin_191_scaffold_6924_55_10	f91bb577db0fa255b53ebe8acb6ff751	465	PRINTS	PR00368	FAD-dependent pyridine nucleotide reductase signature	286	308	7e-21	T	23-07-2021	-	-
Meg22_1214_Bin_191_Lokiarchaeota	Meg22_1214_Bin_191_scaffold_6924_55_10	f91bb577db0fa255b53ebe8acb6ff751	465	PRINTS	PR00368	FAD-dependent pyridine nucleotide reductase signature	132	150	7e-21	T	23-07-2021	-	-
Meg22_1214_Bin_191_Lokiarchaeota	Meg22_1214_Bin_191_scaffold_6924_55_10	f91bb577db0fa255b53ebe8acb6ff751	465	PRINTS	PR00368	FAD-dependent pyridine nucleotide reductase signature	258	274	7e-21	T	23-07-2021	-	-
Meg22_1214_Bin_191_Lokiarchaeota	Meg22_1214_Bin_191_scaffold_6924_55_10	f91bb577db0fa255b53ebe8acb6ff751	465	PANTHER	PTHR43014	MERCURIC REDUCTASE	2	460	1.3e-116	T	23-07-2021	-	-
Meg22_1214_Bin_191_Lokiarchaeota	Meg22_1214_Bin_191_scaffold_6924_55_10	f91bb577db0fa255b53ebe8acb6ff751	465	PIRSF	PIRSF000350	Hg-II_reductase_MerA	1	465	3.7e-118	T	23-07-2021	IPR001100	Pyridine nucleotide-disulphide oxidoreductase, class I
Meg22_1416_Bin_151_Lokiarchaeota	Meg22_1416_Bin_151_scaffold_703_20_27	f91bb577db0fa255b53ebe8acb6ff751	465	Pfam	PF07992	Pyridine nucleotide-disulphide oxidoreductase	4	316	5.1e-52	T	23-07-2021	IPR023753	FAD/NAD(P)-binding domain
Meg22_1416_Bin_151_Lokiarchaeota	Meg22_1416_Bin_151_scaffold_703_20_27	f91bb577db0fa255b53ebe8acb6ff751	465	SUPERFAMILY	SSF55424	FAD/NAD-linked reductases, dimerisation (C-terminal) domain	337	463	2.41e-35	T	23-07-2021	IPR016156	FAD/NAD-linked reductase, dimerisation domain superfamily
Meg22_1416_Bin_151_Lokiarchaeota	Meg22_1416_Bin_151_scaffold_703_20_27	f91bb577db0fa255b53ebe8acb6ff751	465	TIGRFAM	TIGR02053	MerA: mercury(II) reductase	3	465	4.7e-154	T	23-07-2021	IPR021179	Mercury(II) reductase
Meg22_1416_Bin_151_Lokiarchaeota	Meg22_1416_Bin_151_scaffold_703_20_27	f91bb577db0fa255b53ebe8acb6ff751	465	ProSitePatterns	PS00076	Pyridine nucleotide-disulphide oxidoreductases class-I active site.	39	49	-	T	23-07-2021	IPR012999	Pyridine nucleotide-disulphide oxidoreductase, class I, active site
Meg22_1416_Bin_151_Lokiarchaeota	Meg22_1416_Bin_151_scaffold_703_20_27	f91bb577db0fa255b53ebe8acb6ff751	465	Gene3D	G3DSA:3.50.50.60	-	6	325	6.2e-88	T	23-07-2021	IPR036188	FAD/NAD(P)-binding domain superfamily
Meg22_1416_Bin_151_Lokiarchaeota	Meg22_1416_Bin_151_scaffold_703_20_27	f91bb577db0fa255b53ebe8acb6ff751	465	Pfam	PF02852	Pyridine nucleotide-disulphide oxidoreductase, dimerisation domain	341	449	2.6e-31	T	23-07-2021	IPR004099	Pyridine nucleotide-disulphide oxidoreductase, dimerisation domain
Meg22_1416_Bin_151_Lokiarchaeota	Meg22_1416_Bin_151_scaffold_703_20_27	f91bb577db0fa255b53ebe8acb6ff751	465	Gene3D	G3DSA:3.30.390.30	-	340	465	5.2e-41	T	23-07-2021	IPR016156	FAD/NAD-linked reductase, dimerisation domain superfamily
Meg22_1416_Bin_151_Lokiarchaeota	Meg22_1416_Bin_151_scaffold_703_20_27	f91bb577db0fa255b53ebe8acb6ff751	465	Gene3D	G3DSA:3.50.50.60	-	144	265	6.2e-88	T	23-07-2021	IPR036188	FAD/NAD(P)-binding domain superfamily
Meg22_1416_Bin_151_Lokiarchaeota	Meg22_1416_Bin_151_scaffold_703_20_27	f91bb577db0fa255b53ebe8acb6ff751	465	SUPERFAMILY	SSF51905	FAD/NAD(P)-binding domain	1	312	1.58e-42	T	23-07-2021	IPR036188	FAD/NAD(P)-binding domain superfamily
Meg22_1416_Bin_151_Lokiarchaeota	Meg22_1416_Bin_151_scaffold_703_20_27	f91bb577db0fa255b53ebe8acb6ff751	465	PRINTS	PR00411	Pyridine nucleotide disulphide reductase class-I signature	38	53	8.8e-58	T	23-07-2021	-	-
Meg22_1416_Bin_151_Lokiarchaeota	Meg22_1416_Bin_151_scaffold_703_20_27	f91bb577db0fa255b53ebe8acb6ff751	465	PRINTS	PR00411	Pyridine nucleotide disulphide reductase class-I signature	424	444	8.8e-58	T	23-07-2021	-	-
Meg22_1416_Bin_151_Lokiarchaeota	Meg22_1416_Bin_151_scaffold_703_20_27	f91bb577db0fa255b53ebe8acb6ff751	465	PRINTS	PR00411	Pyridine nucleotide disulphide reductase class-I signature	171	196	8.8e-58	T	23-07-2021	-	-
Meg22_1416_Bin_151_Lokiarchaeota	Meg22_1416_Bin_151_scaffold_703_20_27	f91bb577db0fa255b53ebe8acb6ff751	465	PRINTS	PR00411	Pyridine nucleotide disulphide reductase class-I signature	259	273	8.8e-58	T	23-07-2021	-	-
Meg22_1416_Bin_151_Lokiarchaeota	Meg22_1416_Bin_151_scaffold_703_20_27	f91bb577db0fa255b53ebe8acb6ff751	465	PRINTS	PR00411	Pyridine nucleotide disulphide reductase class-I signature	402	417	8.8e-58	T	23-07-2021	-	-
Meg22_1416_Bin_151_Lokiarchaeota	Meg22_1416_Bin_151_scaffold_703_20_27	f91bb577db0fa255b53ebe8acb6ff751	465	PRINTS	PR00411	Pyridine nucleotide disulphide reductase class-I signature	337	358	8.8e-58	T	23-07-2021	-	-
Meg22_1416_Bin_151_Lokiarchaeota	Meg22_1416_Bin_151_scaffold_703_20_27	f91bb577db0fa255b53ebe8acb6ff751	465	PRINTS	PR00411	Pyridine nucleotide disulphide reductase class-I signature	4	26	8.8e-58	T	23-07-2021	-	-
Meg22_1416_Bin_151_Lokiarchaeota	Meg22_1416_Bin_151_scaffold_703_20_27	f91bb577db0fa255b53ebe8acb6ff751	465	PRINTS	PR00411	Pyridine nucleotide disulphide reductase class-I signature	301	308	8.8e-58	T	23-07-2021	-	-
Meg22_1416_Bin_151_Lokiarchaeota	Meg22_1416_Bin_151_scaffold_703_20_27	f91bb577db0fa255b53ebe8acb6ff751	465	PRINTS	PR00411	Pyridine nucleotide disulphide reductase class-I signature	135	144	8.8e-58	T	23-07-2021	-	-
Meg22_1416_Bin_151_Lokiarchaeota	Meg22_1416_Bin_151_scaffold_703_20_27	f91bb577db0fa255b53ebe8acb6ff751	465	PRINTS	PR00368	FAD-dependent pyridine nucleotide reductase signature	5	24	7e-21	T	23-07-2021	-	-
Meg22_1416_Bin_151_Lokiarchaeota	Meg22_1416_Bin_151_scaffold_703_20_27	f91bb577db0fa255b53ebe8acb6ff751	465	PRINTS	PR00368	FAD-dependent pyridine nucleotide reductase signature	171	189	7e-21	T	23-07-2021	-	-
Meg22_1416_Bin_151_Lokiarchaeota	Meg22_1416_Bin_151_scaffold_703_20_27	f91bb577db0fa255b53ebe8acb6ff751	465	PRINTS	PR00368	FAD-dependent pyridine nucleotide reductase signature	286	308	7e-21	T	23-07-2021	-	-
Meg22_1416_Bin_151_Lokiarchaeota	Meg22_1416_Bin_151_scaffold_703_20_27	f91bb577db0fa255b53ebe8acb6ff751	465	PRINTS	PR00368	FAD-dependent pyridine nucleotide reductase signature	132	150	7e-21	T	23-07-2021	-	-
Meg22_1416_Bin_151_Lokiarchaeota	Meg22_1416_Bin_151_scaffold_703_20_27	f91bb577db0fa255b53ebe8acb6ff751	465	PRINTS	PR00368	FAD-dependent pyridine nucleotide reductase signature	258	274	7e-21	T	23-07-2021	-	-
Meg22_1416_Bin_151_Lokiarchaeota	Meg22_1416_Bin_151_scaffold_703_20_27	f91bb577db0fa255b53ebe8acb6ff751	465	PANTHER	PTHR43014	MERCURIC REDUCTASE	2	460	1.3e-116	T	23-07-2021	-	-
Meg22_1416_Bin_151_Lokiarchaeota	Meg22_1416_Bin_151_scaffold_703_20_27	f91bb577db0fa255b53ebe8acb6ff751	465	PIRSF	PIRSF000350	Hg-II_reductase_MerA	1	465	3.7e-118	T	23-07-2021	IPR001100	Pyridine nucleotide-disulphide oxidoreductase, class I
Meg19_1012_Bin_504_Helarchaeota	Meg19_1012_Bin_504_scaffold_367_1_39	d429fae35d3b5d0a19a47bf15a08942d	231	CDD	cd04179	DPM_DPG-synthase_like	7	184	4.2569e-63	T	23-07-2021	-	-
Meg19_1012_Bin_504_Helarchaeota	Meg19_1012_Bin_504_scaffold_367_1_39	d429fae35d3b5d0a19a47bf15a08942d	231	PANTHER	PTHR10859	GLYCOSYL TRANSFERASE	4	224	3.4e-49	T	23-07-2021	-	-
Meg19_1012_Bin_504_Helarchaeota	Meg19_1012_Bin_504_scaffold_367_1_39	d429fae35d3b5d0a19a47bf15a08942d	231	SUPERFAMILY	SSF53448	Nucleotide-diphospho-sugar transferases	1	225	6e-46	T	23-07-2021	IPR029044	Nucleotide-diphospho-sugar transferases
Meg19_1012_Bin_504_Helarchaeota	Meg19_1012_Bin_504_scaffold_367_1_39	d429fae35d3b5d0a19a47bf15a08942d	231	Pfam	PF00535	Glycosyl transferase family 2	6	167	2.3e-32	T	23-07-2021	IPR001173	Glycosyltransferase 2-like
Meg19_1012_Bin_504_Helarchaeota	Meg19_1012_Bin_504_scaffold_367_1_39	d429fae35d3b5d0a19a47bf15a08942d	231	Gene3D	G3DSA:3.90.550.10	Spore Coat Polysaccharide Biosynthesis Protein SpsA; Chain A	1	231	6.7e-53	T	23-07-2021	IPR029044	Nucleotide-diphospho-sugar transferases
Meg19_1012_Bin_504_Helarchaeota	Meg19_1012_Bin_504_scaffold_367_1_39	d429fae35d3b5d0a19a47bf15a08942d	231	PANTHER	PTHR10859:SF105	DOLICHYL-PHOSPHATE BETA-D-MANNOSYLTRANSFERASE	4	224	3.4e-49	T	23-07-2021	-	-
Meg19_1012_Bin_504_Helarchaeota	Meg19_1012_Bin_504_scaffold_911_11_25	9ece6c68b939c8a173f13efc4a503353	553	Coils	Coil	Coil	320	354	-	T	23-07-2021	-	-
Meg19_1012_Bin_504_Helarchaeota	Meg19_1012_Bin_504_scaffold_401_3_62	2c7c06269d0db986dbc903dd8fd2a114	389	Pfam	PF15632	ATP-grasp in the biosynthetic pathway with Ter operon	239	310	4.3e-10	T	23-07-2021	-	-
Meg19_1012_Bin_504_Helarchaeota	Meg19_1012_Bin_504_scaffold_401_3_62	2c7c06269d0db986dbc903dd8fd2a114	389	ProSiteProfiles	PS50975	ATP-grasp fold profile.	119	307	19.002	T	23-07-2021	IPR011761	ATP-grasp fold
Meg19_1012_Bin_504_Helarchaeota	Meg19_1012_Bin_504_scaffold_401_3_62	2c7c06269d0db986dbc903dd8fd2a114	389	SUPERFAMILY	SSF56059	Glutathione synthetase ATP-binding domain-like	114	310	1.86e-19	T	23-07-2021	-	-
Meg19_1012_Bin_504_Helarchaeota	Meg19_1012_Bin_504_scaffold_401_3_62	2c7c06269d0db986dbc903dd8fd2a114	389	Gene3D	G3DSA:3.30.470.20	-	106	340	1.6e-11	T	23-07-2021	-	-
Meg22_1416_Bin_151_Lokiarchaeota	Meg22_1416_Bin_151_scaffold_12085_90_1	6314bc48dca641ab3b60b3aaa622e620	102	ProSiteProfiles	PS51379	4Fe-4S ferredoxin-type iron-sulfur binding domain profile.	37	66	7.962	T	23-07-2021	IPR017896	4Fe-4S ferredoxin-type, iron-sulphur binding domain
Meg22_1416_Bin_151_Lokiarchaeota	Meg22_1416_Bin_151_scaffold_12085_90_1	6314bc48dca641ab3b60b3aaa622e620	102	ProSitePatterns	PS00198	4Fe-4S ferredoxin-type iron-sulfur binding region signature.	78	89	-	T	23-07-2021	IPR017900	4Fe-4S ferredoxin, iron-sulphur binding, conserved site
Meg22_1416_Bin_151_Lokiarchaeota	Meg22_1416_Bin_151_scaffold_12085_90_1	6314bc48dca641ab3b60b3aaa622e620	102	SUPERFAMILY	SSF54862	4Fe-4S ferredoxins	41	98	8.66e-14	T	23-07-2021	-	-
Meg22_1416_Bin_151_Lokiarchaeota	Meg22_1416_Bin_151_scaffold_12085_90_1	6314bc48dca641ab3b60b3aaa622e620	102	Gene3D	G3DSA:3.30.70.20	-	9	102	5.4e-11	T	23-07-2021	-	-
Meg22_1416_Bin_151_Lokiarchaeota	Meg22_1416_Bin_151_scaffold_12085_90_1	6314bc48dca641ab3b60b3aaa622e620	102	Pfam	PF13187	4Fe-4S dicluster domain	45	93	2.7e-07	T	23-07-2021	IPR017896	4Fe-4S ferredoxin-type, iron-sulphur binding domain
Meg22_1416_Bin_151_Lokiarchaeota	Meg22_1416_Bin_151_scaffold_12085_90_1	6314bc48dca641ab3b60b3aaa622e620	102	PRINTS	PR01868	ABC transporter family E signature	75	99	1.8e-05	T	23-07-2021	IPR013283	RLI1
Meg22_1416_Bin_151_Lokiarchaeota	Meg22_1416_Bin_151_scaffold_12085_90_1	6314bc48dca641ab3b60b3aaa622e620	102	PRINTS	PR01868	ABC transporter family E signature	51	66	1.8e-05	T	23-07-2021	IPR013283	RLI1
Meg22_1416_Bin_151_Lokiarchaeota	Meg22_1416_Bin_151_scaffold_12085_90_1	6314bc48dca641ab3b60b3aaa622e620	102	ProSiteProfiles	PS51379	4Fe-4S ferredoxin-type iron-sulfur binding domain profile.	68	98	9.315	T	23-07-2021	IPR017896	4Fe-4S ferredoxin-type, iron-sulphur binding domain
Meg22_1416_Bin_151_Lokiarchaeota	Meg22_1416_Bin_151_scaffold_1049_29_28	fd58148f7c6af090ab1fbfca5558c1cb	222	ProSiteProfiles	PS51186	Gcn5-related N-acetyltransferase (GNAT) domain profile.	73	222	20.226	T	23-07-2021	IPR000182	GNAT domain
Meg22_1416_Bin_151_Lokiarchaeota	Meg22_1416_Bin_151_scaffold_1049_29_28	fd58148f7c6af090ab1fbfca5558c1cb	222	Gene3D	G3DSA:3.40.630.30	-	72	214	3.7e-26	T	23-07-2021	-	-
Meg22_1416_Bin_151_Lokiarchaeota	Meg22_1416_Bin_151_scaffold_1049_29_28	fd58148f7c6af090ab1fbfca5558c1cb	222	SUPERFAMILY	SSF55729	Acyl-CoA N-acyltransferases (Nat)	73	209	6e-25	T	23-07-2021	IPR016181	Acyl-CoA N-acyltransferase
Meg22_1416_Bin_151_Lokiarchaeota	Meg22_1416_Bin_151_scaffold_1049_29_28	fd58148f7c6af090ab1fbfca5558c1cb	222	CDD	cd04301	NAT_SF	120	181	6.18725e-09	T	23-07-2021	-	-
Meg22_1416_Bin_151_Lokiarchaeota	Meg22_1416_Bin_151_scaffold_1049_29_28	fd58148f7c6af090ab1fbfca5558c1cb	222	Pfam	PF00583	Acetyltransferase (GNAT) family	88	201	1e-12	T	23-07-2021	IPR000182	GNAT domain
Meg22_1416_Bin_151_Lokiarchaeota	Meg22_1416_Bin_151_scaffold_1049_29_28	fd58148f7c6af090ab1fbfca5558c1cb	222	PANTHER	PTHR43420:SF16	PEPTIDYL-LYSINE N-ACETYLTRANSFERASE YIAC	50	208	2.9e-13	T	23-07-2021	-	-
Meg22_1416_Bin_151_Lokiarchaeota	Meg22_1416_Bin_151_scaffold_1049_29_28	fd58148f7c6af090ab1fbfca5558c1cb	222	PANTHER	PTHR43420	ACETYLTRANSFERASE	50	208	2.9e-13	T	23-07-2021	-	-
Meg22_1012_Bin_233_Lokiarchaeota	Meg22_1012_Bin_233_scaffold_23_6_21	32d8c397dd708a955babdc5561e7c6b2	446	Gene3D	G3DSA:3.30.1490.350	-	145	218	1.2e-25	T	23-07-2021	-	-
Meg22_1012_Bin_233_Lokiarchaeota	Meg22_1012_Bin_233_scaffold_23_6_21	32d8c397dd708a955babdc5561e7c6b2	446	Pfam	PF02655	ATP-grasp domain	129	313	4.9e-25	T	23-07-2021	IPR003806	ATP-grasp fold, PylC-type
Meg22_1012_Bin_233_Lokiarchaeota	Meg22_1012_Bin_233_scaffold_23_6_21	32d8c397dd708a955babdc5561e7c6b2	446	PANTHER	PTHR23132:SF23	D-ALANINE--D-ALANINE LIGASE B	119	314	1e-13	T	23-07-2021	-	-
Meg22_1012_Bin_233_Lokiarchaeota	Meg22_1012_Bin_233_scaffold_23_6_21	32d8c397dd708a955babdc5561e7c6b2	446	Gene3D	G3DSA:3.40.50.11770	-	3	115	2.7e-06	T	23-07-2021	-	-
Meg22_1012_Bin_233_Lokiarchaeota	Meg22_1012_Bin_233_scaffold_23_6_21	32d8c397dd708a955babdc5561e7c6b2	446	Gene3D	G3DSA:3.30.470.20	-	126	326	1.2e-25	T	23-07-2021	-	-
Meg22_1012_Bin_233_Lokiarchaeota	Meg22_1012_Bin_233_scaffold_23_6_21	32d8c397dd708a955babdc5561e7c6b2	446	ProSiteProfiles	PS50975	ATP-grasp fold profile.	134	334	26.77	T	23-07-2021	IPR011761	ATP-grasp fold
Meg22_1012_Bin_233_Lokiarchaeota	Meg22_1012_Bin_233_scaffold_23_6_21	32d8c397dd708a955babdc5561e7c6b2	446	SUPERFAMILY	SSF56059	Glutathione synthetase ATP-binding domain-like	129	331	1.58e-20	T	23-07-2021	-	-
Meg22_1012_Bin_233_Lokiarchaeota	Meg22_1012_Bin_233_scaffold_23_6_21	32d8c397dd708a955babdc5561e7c6b2	446	Pfam	PF18301	pre ATP-grasp 3 domain	51	121	2.7e-08	T	23-07-2021	IPR040803	Tyramine--L-glutamate ligase, pre ATP-grasp domain
Meg22_1012_Bin_233_Lokiarchaeota	Meg22_1012_Bin_233_scaffold_23_6_21	32d8c397dd708a955babdc5561e7c6b2	446	PANTHER	PTHR23132	D-ALANINE--D-ALANINE LIGASE	119	314	1e-13	T	23-07-2021	-	-
Meg22_1214_Bin_191_Lokiarchaeota	Meg22_1214_Bin_191_scaffold_750_11_21	32d8c397dd708a955babdc5561e7c6b2	446	Gene3D	G3DSA:3.30.1490.350	-	145	218	1.2e-25	T	23-07-2021	-	-
Meg22_1214_Bin_191_Lokiarchaeota	Meg22_1214_Bin_191_scaffold_750_11_21	32d8c397dd708a955babdc5561e7c6b2	446	Pfam	PF02655	ATP-grasp domain	129	313	4.9e-25	T	23-07-2021	IPR003806	ATP-grasp fold, PylC-type
Meg22_1214_Bin_191_Lokiarchaeota	Meg22_1214_Bin_191_scaffold_750_11_21	32d8c397dd708a955babdc5561e7c6b2	446	PANTHER	PTHR23132:SF23	D-ALANINE--D-ALANINE LIGASE B	119	314	1e-13	T	23-07-2021	-	-
Meg22_1214_Bin_191_Lokiarchaeota	Meg22_1214_Bin_191_scaffold_750_11_21	32d8c397dd708a955babdc5561e7c6b2	446	Gene3D	G3DSA:3.40.50.11770	-	3	115	2.7e-06	T	23-07-2021	-	-
Meg22_1214_Bin_191_Lokiarchaeota	Meg22_1214_Bin_191_scaffold_750_11_21	32d8c397dd708a955babdc5561e7c6b2	446	Gene3D	G3DSA:3.30.470.20	-	126	326	1.2e-25	T	23-07-2021	-	-
Meg22_1214_Bin_191_Lokiarchaeota	Meg22_1214_Bin_191_scaffold_750_11_21	32d8c397dd708a955babdc5561e7c6b2	446	ProSiteProfiles	PS50975	ATP-grasp fold profile.	134	334	26.77	T	23-07-2021	IPR011761	ATP-grasp fold
Meg22_1214_Bin_191_Lokiarchaeota	Meg22_1214_Bin_191_scaffold_750_11_21	32d8c397dd708a955babdc5561e7c6b2	446	SUPERFAMILY	SSF56059	Glutathione synthetase ATP-binding domain-like	129	331	1.58e-20	T	23-07-2021	-	-
Meg22_1214_Bin_191_Lokiarchaeota	Meg22_1214_Bin_191_scaffold_750_11_21	32d8c397dd708a955babdc5561e7c6b2	446	Pfam	PF18301	pre ATP-grasp 3 domain	51	121	2.7e-08	T	23-07-2021	IPR040803	Tyramine--L-glutamate ligase, pre ATP-grasp domain
Meg22_1214_Bin_191_Lokiarchaeota	Meg22_1214_Bin_191_scaffold_750_11_21	32d8c397dd708a955babdc5561e7c6b2	446	PANTHER	PTHR23132	D-ALANINE--D-ALANINE LIGASE	119	314	1e-13	T	23-07-2021	-	-
Meg22_1416_Bin_151_Lokiarchaeota	Meg22_1416_Bin_151_scaffold_1963_43_27	32d8c397dd708a955babdc5561e7c6b2	446	Gene3D	G3DSA:3.30.1490.350	-	145	218	1.2e-25	T	23-07-2021	-	-
Meg22_1416_Bin_151_Lokiarchaeota	Meg22_1416_Bin_151_scaffold_1963_43_27	32d8c397dd708a955babdc5561e7c6b2	446	Pfam	PF02655	ATP-grasp domain	129	313	4.9e-25	T	23-07-2021	IPR003806	ATP-grasp fold, PylC-type
Meg22_1416_Bin_151_Lokiarchaeota	Meg22_1416_Bin_151_scaffold_1963_43_27	32d8c397dd708a955babdc5561e7c6b2	446	PANTHER	PTHR23132:SF23	D-ALANINE--D-ALANINE LIGASE B	119	314	1e-13	T	23-07-2021	-	-
Meg22_1416_Bin_151_Lokiarchaeota	Meg22_1416_Bin_151_scaffold_1963_43_27	32d8c397dd708a955babdc5561e7c6b2	446	Gene3D	G3DSA:3.40.50.11770	-	3	115	2.7e-06	T	23-07-2021	-	-
Meg22_1416_Bin_151_Lokiarchaeota	Meg22_1416_Bin_151_scaffold_1963_43_27	32d8c397dd708a955babdc5561e7c6b2	446	Gene3D	G3DSA:3.30.470.20	-	126	326	1.2e-25	T	23-07-2021	-	-
Meg22_1416_Bin_151_Lokiarchaeota	Meg22_1416_Bin_151_scaffold_1963_43_27	32d8c397dd708a955babdc5561e7c6b2	446	ProSiteProfiles	PS50975	ATP-grasp fold profile.	134	334	26.77	T	23-07-2021	IPR011761	ATP-grasp fold
Meg22_1416_Bin_151_Lokiarchaeota	Meg22_1416_Bin_151_scaffold_1963_43_27	32d8c397dd708a955babdc5561e7c6b2	446	SUPERFAMILY	SSF56059	Glutathione synthetase ATP-binding domain-like	129	331	1.58e-20	T	23-07-2021	-	-
Meg22_1416_Bin_151_Lokiarchaeota	Meg22_1416_Bin_151_scaffold_1963_43_27	32d8c397dd708a955babdc5561e7c6b2	446	Pfam	PF18301	pre ATP-grasp 3 domain	51	121	2.7e-08	T	23-07-2021	IPR040803	Tyramine--L-glutamate ligase, pre ATP-grasp domain
Meg22_1416_Bin_151_Lokiarchaeota	Meg22_1416_Bin_151_scaffold_1963_43_27	32d8c397dd708a955babdc5561e7c6b2	446	PANTHER	PTHR23132	D-ALANINE--D-ALANINE LIGASE	119	314	1e-13	T	23-07-2021	-	-
Meg22_1416_Bin_151_Lokiarchaeota	Meg22_1416_Bin_151_scaffold_18613_103_5	386b2c86ba56a855b4fc692502aa06e0	115	PANTHER	PTHR33933	NUCLEOTIDYLTRANSFERASE	8	113	4.3e-13	T	23-07-2021	-	-
Meg22_1416_Bin_151_Lokiarchaeota	Meg22_1416_Bin_151_scaffold_18613_103_5	386b2c86ba56a855b4fc692502aa06e0	115	CDD	cd05403	NT_KNTase_like	35	111	4.37578e-06	T	23-07-2021	-	-
Meg22_1416_Bin_151_Lokiarchaeota	Meg22_1416_Bin_151_scaffold_18613_103_5	386b2c86ba56a855b4fc692502aa06e0	115	SUPERFAMILY	SSF81301	Nucleotidyltransferase	8	113	2.06e-15	T	23-07-2021	IPR043519	Nucleotidyltransferase superfamily
Meg22_1416_Bin_151_Lokiarchaeota	Meg22_1416_Bin_151_scaffold_18613_103_5	386b2c86ba56a855b4fc692502aa06e0	115	Pfam	PF18765	Polymerase beta, Nucleotidyltransferase	28	114	5.1e-12	T	23-07-2021	IPR041633	Polymerase beta, nucleotidyltransferase
Meg22_1416_Bin_151_Lokiarchaeota	Meg22_1416_Bin_151_scaffold_18613_103_5	386b2c86ba56a855b4fc692502aa06e0	115	Gene3D	G3DSA:3.30.460.10	Beta Polymerase	6	112	1.7e-16	T	23-07-2021	IPR043519	Nucleotidyltransferase superfamily
Meg22_1012_Bin_233_Lokiarchaeota	Meg22_1012_Bin_233_scaffold_193_17_77	386b2c86ba56a855b4fc692502aa06e0	115	PANTHER	PTHR33933	NUCLEOTIDYLTRANSFERASE	8	113	4.3e-13	T	23-07-2021	-	-
Meg22_1012_Bin_233_Lokiarchaeota	Meg22_1012_Bin_233_scaffold_193_17_77	386b2c86ba56a855b4fc692502aa06e0	115	CDD	cd05403	NT_KNTase_like	35	111	4.37578e-06	T	23-07-2021	-	-
Meg22_1012_Bin_233_Lokiarchaeota	Meg22_1012_Bin_233_scaffold_193_17_77	386b2c86ba56a855b4fc692502aa06e0	115	SUPERFAMILY	SSF81301	Nucleotidyltransferase	8	113	2.06e-15	T	23-07-2021	IPR043519	Nucleotidyltransferase superfamily
Meg22_1012_Bin_233_Lokiarchaeota	Meg22_1012_Bin_233_scaffold_193_17_77	386b2c86ba56a855b4fc692502aa06e0	115	Pfam	PF18765	Polymerase beta, Nucleotidyltransferase	28	114	5.1e-12	T	23-07-2021	IPR041633	Polymerase beta, nucleotidyltransferase
Meg22_1012_Bin_233_Lokiarchaeota	Meg22_1012_Bin_233_scaffold_193_17_77	386b2c86ba56a855b4fc692502aa06e0	115	Gene3D	G3DSA:3.30.460.10	Beta Polymerase	6	112	1.7e-16	T	23-07-2021	IPR043519	Nucleotidyltransferase superfamily
Meg22_1214_Bin_191_Lokiarchaeota	Meg22_1214_Bin_191_scaffold_13618_76_5	386b2c86ba56a855b4fc692502aa06e0	115	PANTHER	PTHR33933	NUCLEOTIDYLTRANSFERASE	8	113	4.3e-13	T	23-07-2021	-	-
Meg22_1214_Bin_191_Lokiarchaeota	Meg22_1214_Bin_191_scaffold_13618_76_5	386b2c86ba56a855b4fc692502aa06e0	115	CDD	cd05403	NT_KNTase_like	35	111	4.37578e-06	T	23-07-2021	-	-
Meg22_1214_Bin_191_Lokiarchaeota	Meg22_1214_Bin_191_scaffold_13618_76_5	386b2c86ba56a855b4fc692502aa06e0	115	SUPERFAMILY	SSF81301	Nucleotidyltransferase	8	113	2.06e-15	T	23-07-2021	IPR043519	Nucleotidyltransferase superfamily
Meg22_1214_Bin_191_Lokiarchaeota	Meg22_1214_Bin_191_scaffold_13618_76_5	386b2c86ba56a855b4fc692502aa06e0	115	Pfam	PF18765	Polymerase beta, Nucleotidyltransferase	28	114	5.1e-12	T	23-07-2021	IPR041633	Polymerase beta, nucleotidyltransferase
Meg22_1214_Bin_191_Lokiarchaeota	Meg22_1214_Bin_191_scaffold_13618_76_5	386b2c86ba56a855b4fc692502aa06e0	115	Gene3D	G3DSA:3.30.460.10	Beta Polymerase	6	112	1.7e-16	T	23-07-2021	IPR043519	Nucleotidyltransferase superfamily
Meg22_1012_Bin_233_Lokiarchaeota	Meg22_1012_Bin_233_scaffold_166_13_61	bedb8c12198ae0a775b2e5d88fd1c0a7	328	SUPERFAMILY	SSF53474	alpha/beta-Hydrolases	66	326	1.4e-20	T	23-07-2021	IPR029058	Alpha/Beta hydrolase fold
Meg22_1012_Bin_233_Lokiarchaeota	Meg22_1012_Bin_233_scaffold_166_13_61	bedb8c12198ae0a775b2e5d88fd1c0a7	328	Pfam	PF12146	Serine aminopeptidase, S33	103	234	4.5e-09	T	23-07-2021	IPR022742	Serine aminopeptidase, S33
Meg22_1012_Bin_233_Lokiarchaeota	Meg22_1012_Bin_233_scaffold_166_13_61	bedb8c12198ae0a775b2e5d88fd1c0a7	328	Gene3D	G3DSA:3.40.50.1820	-	87	328	3.5e-23	T	23-07-2021	IPR029058	Alpha/Beta hydrolase fold
Meg22_1416_Bin_151_Lokiarchaeota	Meg22_1416_Bin_151_scaffold_488_16_30	bedb8c12198ae0a775b2e5d88fd1c0a7	328	SUPERFAMILY	SSF53474	alpha/beta-Hydrolases	66	326	1.4e-20	T	23-07-2021	IPR029058	Alpha/Beta hydrolase fold
Meg22_1416_Bin_151_Lokiarchaeota	Meg22_1416_Bin_151_scaffold_488_16_30	bedb8c12198ae0a775b2e5d88fd1c0a7	328	Pfam	PF12146	Serine aminopeptidase, S33	103	234	4.5e-09	T	23-07-2021	IPR022742	Serine aminopeptidase, S33
Meg22_1416_Bin_151_Lokiarchaeota	Meg22_1416_Bin_151_scaffold_488_16_30	bedb8c12198ae0a775b2e5d88fd1c0a7	328	Gene3D	G3DSA:3.40.50.1820	-	87	328	3.5e-23	T	23-07-2021	IPR029058	Alpha/Beta hydrolase fold
Meg22_1214_Bin_191_Lokiarchaeota	Meg22_1214_Bin_191_scaffold_387_6_61	bedb8c12198ae0a775b2e5d88fd1c0a7	328	SUPERFAMILY	SSF53474	alpha/beta-Hydrolases	66	326	1.4e-20	T	23-07-2021	IPR029058	Alpha/Beta hydrolase fold
Meg22_1214_Bin_191_Lokiarchaeota	Meg22_1214_Bin_191_scaffold_387_6_61	bedb8c12198ae0a775b2e5d88fd1c0a7	328	Pfam	PF12146	Serine aminopeptidase, S33	103	234	4.5e-09	T	23-07-2021	IPR022742	Serine aminopeptidase, S33
Meg22_1214_Bin_191_Lokiarchaeota	Meg22_1214_Bin_191_scaffold_387_6_61	bedb8c12198ae0a775b2e5d88fd1c0a7	328	Gene3D	G3DSA:3.40.50.1820	-	87	328	3.5e-23	T	23-07-2021	IPR029058	Alpha/Beta hydrolase fold
Meg22_1416_Bin_151_Lokiarchaeota	Meg22_1416_Bin_151_scaffold_440_15_76	09c65f53c59429bb9d801737f45f7bce	432	Pfam	PF01837	Homocysteine biosynthesis enzyme, sulfur-incorporation	19	418	3.8e-87	T	23-07-2021	IPR002708	Homocysteine biosynthesis enzyme, sulfur-incorporation
Meg22_1416_Bin_151_Lokiarchaeota	Meg22_1416_Bin_151_scaffold_440_15_76	09c65f53c59429bb9d801737f45f7bce	432	PANTHER	PTHR48108	CBS DOMAIN-CONTAINING PROTEIN CBSX2, CHLOROPLASTIC	4	283	2.2e-36	T	23-07-2021	-	-
Meg22_1416_Bin_151_Lokiarchaeota	Meg22_1416_Bin_151_scaffold_440_15_76	09c65f53c59429bb9d801737f45f7bce	432	SUPERFAMILY	SSF54862	4Fe-4S ferredoxins	279	375	9.43e-14	T	23-07-2021	-	-
Meg22_1416_Bin_151_Lokiarchaeota	Meg22_1416_Bin_151_scaffold_440_15_76	09c65f53c59429bb9d801737f45f7bce	432	ProSitePatterns	PS00198	4Fe-4S ferredoxin-type iron-sulfur binding region signature.	353	364	-	T	23-07-2021	IPR017900	4Fe-4S ferredoxin, iron-sulphur binding, conserved site
Meg22_1416_Bin_151_Lokiarchaeota	Meg22_1416_Bin_151_scaffold_440_15_76	09c65f53c59429bb9d801737f45f7bce	432	ProSiteProfiles	PS51379	4Fe-4S ferredoxin-type iron-sulfur binding domain profile.	344	373	9.567	T	23-07-2021	IPR017896	4Fe-4S ferredoxin-type, iron-sulphur binding domain
Meg22_1416_Bin_151_Lokiarchaeota	Meg22_1416_Bin_151_scaffold_440_15_76	09c65f53c59429bb9d801737f45f7bce	432	Gene3D	G3DSA:3.30.70.20	-	312	411	4e-06	T	23-07-2021	-	-
Meg22_1416_Bin_151_Lokiarchaeota	Meg22_1416_Bin_151_scaffold_440_15_76	09c65f53c59429bb9d801737f45f7bce	432	ProSiteProfiles	PS51379	4Fe-4S ferredoxin-type iron-sulfur binding domain profile.	316	343	7.626	T	23-07-2021	IPR017896	4Fe-4S ferredoxin-type, iron-sulphur binding domain
Meg22_1416_Bin_151_Lokiarchaeota	Meg22_1416_Bin_151_scaffold_440_15_76	09c65f53c59429bb9d801737f45f7bce	432	TIGRFAM	TIGR03287	methan_mark_16: putative methanogenesis marker 16 metalloprotein	21	417	1.7e-141	T	23-07-2021	IPR017677	Putative methanogenesis marker 16 metalloprotein
Meg22_1416_Bin_151_Lokiarchaeota	Meg22_1416_Bin_151_scaffold_440_15_76	09c65f53c59429bb9d801737f45f7bce	432	PANTHER	PTHR48108:SF3	SLR0689 PROTEIN	4	283	2.2e-36	T	23-07-2021	-	-
Meg22_1416_Bin_151_Lokiarchaeota	Meg22_1416_Bin_151_scaffold_440_15_76	09c65f53c59429bb9d801737f45f7bce	432	Pfam	PF00037	4Fe-4S binding domain	348	367	4.6e-05	T	23-07-2021	IPR017896	4Fe-4S ferredoxin-type, iron-sulphur binding domain
Meg22_1214_Bin_191_Lokiarchaeota	Meg22_1214_Bin_191_scaffold_107_1_82	09c65f53c59429bb9d801737f45f7bce	432	Pfam	PF01837	Homocysteine biosynthesis enzyme, sulfur-incorporation	19	418	3.8e-87	T	23-07-2021	IPR002708	Homocysteine biosynthesis enzyme, sulfur-incorporation
Meg22_1214_Bin_191_Lokiarchaeota	Meg22_1214_Bin_191_scaffold_107_1_82	09c65f53c59429bb9d801737f45f7bce	432	PANTHER	PTHR48108	CBS DOMAIN-CONTAINING PROTEIN CBSX2, CHLOROPLASTIC	4	283	2.2e-36	T	23-07-2021	-	-
Meg22_1214_Bin_191_Lokiarchaeota	Meg22_1214_Bin_191_scaffold_107_1_82	09c65f53c59429bb9d801737f45f7bce	432	SUPERFAMILY	SSF54862	4Fe-4S ferredoxins	279	375	9.43e-14	T	23-07-2021	-	-
Meg22_1214_Bin_191_Lokiarchaeota	Meg22_1214_Bin_191_scaffold_107_1_82	09c65f53c59429bb9d801737f45f7bce	432	ProSitePatterns	PS00198	4Fe-4S ferredoxin-type iron-sulfur binding region signature.	353	364	-	T	23-07-2021	IPR017900	4Fe-4S ferredoxin, iron-sulphur binding, conserved site
Meg22_1214_Bin_191_Lokiarchaeota	Meg22_1214_Bin_191_scaffold_107_1_82	09c65f53c59429bb9d801737f45f7bce	432	ProSiteProfiles	PS51379	4Fe-4S ferredoxin-type iron-sulfur binding domain profile.	344	373	9.567	T	23-07-2021	IPR017896	4Fe-4S ferredoxin-type, iron-sulphur binding domain
Meg22_1214_Bin_191_Lokiarchaeota	Meg22_1214_Bin_191_scaffold_107_1_82	09c65f53c59429bb9d801737f45f7bce	432	Gene3D	G3DSA:3.30.70.20	-	312	411	4e-06	T	23-07-2021	-	-
Meg22_1214_Bin_191_Lokiarchaeota	Meg22_1214_Bin_191_scaffold_107_1_82	09c65f53c59429bb9d801737f45f7bce	432	ProSiteProfiles	PS51379	4Fe-4S ferredoxin-type iron-sulfur binding domain profile.	316	343	7.626	T	23-07-2021	IPR017896	4Fe-4S ferredoxin-type, iron-sulphur binding domain
Meg22_1214_Bin_191_Lokiarchaeota	Meg22_1214_Bin_191_scaffold_107_1_82	09c65f53c59429bb9d801737f45f7bce	432	TIGRFAM	TIGR03287	methan_mark_16: putative methanogenesis marker 16 metalloprotein	21	417	1.7e-141	T	23-07-2021	IPR017677	Putative methanogenesis marker 16 metalloprotein
Meg22_1214_Bin_191_Lokiarchaeota	Meg22_1214_Bin_191_scaffold_107_1_82	09c65f53c59429bb9d801737f45f7bce	432	PANTHER	PTHR48108:SF3	SLR0689 PROTEIN	4	283	2.2e-36	T	23-07-2021	-	-
Meg22_1214_Bin_191_Lokiarchaeota	Meg22_1214_Bin_191_scaffold_107_1_82	09c65f53c59429bb9d801737f45f7bce	432	Pfam	PF00037	4Fe-4S binding domain	348	367	4.6e-05	T	23-07-2021	IPR017896	4Fe-4S ferredoxin-type, iron-sulphur binding domain
Meg22_1012_Bin_233_Lokiarchaeota	Meg22_1012_Bin_233_scaffold_21_5_97	09c65f53c59429bb9d801737f45f7bce	432	Pfam	PF01837	Homocysteine biosynthesis enzyme, sulfur-incorporation	19	418	3.8e-87	T	23-07-2021	IPR002708	Homocysteine biosynthesis enzyme, sulfur-incorporation
Meg22_1012_Bin_233_Lokiarchaeota	Meg22_1012_Bin_233_scaffold_21_5_97	09c65f53c59429bb9d801737f45f7bce	432	PANTHER	PTHR48108	CBS DOMAIN-CONTAINING PROTEIN CBSX2, CHLOROPLASTIC	4	283	2.2e-36	T	23-07-2021	-	-
Meg22_1012_Bin_233_Lokiarchaeota	Meg22_1012_Bin_233_scaffold_21_5_97	09c65f53c59429bb9d801737f45f7bce	432	SUPERFAMILY	SSF54862	4Fe-4S ferredoxins	279	375	9.43e-14	T	23-07-2021	-	-
Meg22_1012_Bin_233_Lokiarchaeota	Meg22_1012_Bin_233_scaffold_21_5_97	09c65f53c59429bb9d801737f45f7bce	432	ProSitePatterns	PS00198	4Fe-4S ferredoxin-type iron-sulfur binding region signature.	353	364	-	T	23-07-2021	IPR017900	4Fe-4S ferredoxin, iron-sulphur binding, conserved site
Meg22_1012_Bin_233_Lokiarchaeota	Meg22_1012_Bin_233_scaffold_21_5_97	09c65f53c59429bb9d801737f45f7bce	432	ProSiteProfiles	PS51379	4Fe-4S ferredoxin-type iron-sulfur binding domain profile.	344	373	9.567	T	23-07-2021	IPR017896	4Fe-4S ferredoxin-type, iron-sulphur binding domain
Meg22_1012_Bin_233_Lokiarchaeota	Meg22_1012_Bin_233_scaffold_21_5_97	09c65f53c59429bb9d801737f45f7bce	432	Gene3D	G3DSA:3.30.70.20	-	312	411	4e-06	T	23-07-2021	-	-
Meg22_1012_Bin_233_Lokiarchaeota	Meg22_1012_Bin_233_scaffold_21_5_97	09c65f53c59429bb9d801737f45f7bce	432	ProSiteProfiles	PS51379	4Fe-4S ferredoxin-type iron-sulfur binding domain profile.	316	343	7.626	T	23-07-2021	IPR017896	4Fe-4S ferredoxin-type, iron-sulphur binding domain
Meg22_1012_Bin_233_Lokiarchaeota	Meg22_1012_Bin_233_scaffold_21_5_97	09c65f53c59429bb9d801737f45f7bce	432	TIGRFAM	TIGR03287	methan_mark_16: putative methanogenesis marker 16 metalloprotein	21	417	1.7e-141	T	23-07-2021	IPR017677	Putative methanogenesis marker 16 metalloprotein
Meg22_1012_Bin_233_Lokiarchaeota	Meg22_1012_Bin_233_scaffold_21_5_97	09c65f53c59429bb9d801737f45f7bce	432	PANTHER	PTHR48108:SF3	SLR0689 PROTEIN	4	283	2.2e-36	T	23-07-2021	-	-
Meg22_1012_Bin_233_Lokiarchaeota	Meg22_1012_Bin_233_scaffold_21_5_97	09c65f53c59429bb9d801737f45f7bce	432	Pfam	PF00037	4Fe-4S binding domain	348	367	4.6e-05	T	23-07-2021	IPR017896	4Fe-4S ferredoxin-type, iron-sulphur binding domain
Meg22_1214_Bin_191_Lokiarchaeota	Meg22_1214_Bin_191_scaffold_3643_41_9	4fff3437e61645fe64a137c69f8cb59f	166	Coils	Coil	Coil	119	139	-	T	23-07-2021	-	-
Meg22_1416_Bin_151_Lokiarchaeota	Meg22_1416_Bin_151_scaffold_420_12_5	482c196a25de9088494ec55fd0bcddc1	223	PANTHER	PTHR30545:SF2	SUGAR FERMENTATION STIMULATION PROTEIN A	4	219	8.5e-44	T	23-07-2021	-	-
Meg22_1416_Bin_151_Lokiarchaeota	Meg22_1416_Bin_151_scaffold_420_12_5	482c196a25de9088494ec55fd0bcddc1	223	TIGRFAM	TIGR00230	sfsA: sugar fermentation stimulation protein	10	206	7.6e-45	T	23-07-2021	IPR005224	Sugar fermentation stimulation protein
Meg22_1416_Bin_151_Lokiarchaeota	Meg22_1416_Bin_151_scaffold_420_12_5	482c196a25de9088494ec55fd0bcddc1	223	Pfam	PF17746	SfsA N-terminal OB domain	21	83	1.4e-16	T	23-07-2021	IPR041465	SfsA, N-terminal OB domain
Meg22_1416_Bin_151_Lokiarchaeota	Meg22_1416_Bin_151_scaffold_420_12_5	482c196a25de9088494ec55fd0bcddc1	223	Gene3D	G3DSA:3.40.1350.60	-	85	218	3.3e-28	T	23-07-2021	-	-
Meg22_1416_Bin_151_Lokiarchaeota	Meg22_1416_Bin_151_scaffold_420_12_5	482c196a25de9088494ec55fd0bcddc1	223	Pfam	PF03749	Sugar fermentation stimulation protein RE domain	98	207	6.2e-27	T	23-07-2021	IPR040452	Sugar fermentation stimulation protein, C-terminal
Meg22_1416_Bin_151_Lokiarchaeota	Meg22_1416_Bin_151_scaffold_420_12_5	482c196a25de9088494ec55fd0bcddc1	223	Gene3D	G3DSA:2.40.50.580	-	7	83	3.3e-18	T	23-07-2021	-	-
Meg22_1416_Bin_151_Lokiarchaeota	Meg22_1416_Bin_151_scaffold_420_12_5	482c196a25de9088494ec55fd0bcddc1	223	PANTHER	PTHR30545	SUGAR FERMENTATION STIMULATION PROTEIN A	4	219	8.5e-44	T	23-07-2021	IPR005224	Sugar fermentation stimulation protein
Meg22_1416_Bin_151_Lokiarchaeota	Meg22_1416_Bin_151_scaffold_703_20_42	a9ac7e8190ce5b5338a1aa937ad5bdf1	906	PANTHER	PTHR37469	CELLOBIONIC ACID PHOSPHORYLASE-RELATED	266	692	1.4e-30	T	23-07-2021	-	-
Meg22_1416_Bin_151_Lokiarchaeota	Meg22_1416_Bin_151_scaffold_703_20_42	a9ac7e8190ce5b5338a1aa937ad5bdf1	906	SUPERFAMILY	SSF48208	Six-hairpin glycosidases	353	746	8.16e-24	T	23-07-2021	IPR008928	Six-hairpin glycosidase superfamily
Meg22_1416_Bin_151_Lokiarchaeota	Meg22_1416_Bin_151_scaffold_703_20_42	a9ac7e8190ce5b5338a1aa937ad5bdf1	906	Pfam	PF17167	Glycosyl hydrolase 36 superfamily, catalytic domain	475	724	7.2e-24	T	23-07-2021	IPR033432	Glycosyl hydrolase 36, catalytic domain
Meg22_1416_Bin_151_Lokiarchaeota	Meg22_1416_Bin_151_scaffold_703_20_42	a9ac7e8190ce5b5338a1aa937ad5bdf1	906	Gene3D	G3DSA:1.50.10.10	-	393	734	1.8e-58	T	23-07-2021	IPR012341	Six-hairpin glycosidase-like superfamily
Meg22_1416_Bin_151_Lokiarchaeota	Meg22_1416_Bin_151_scaffold_420_12_53	2b09a685bf274a5b4431dd465f9401f7	390	SUPERFAMILY	SSF51735	NAD(P)-binding Rossmann-fold domains	1	176	1.93e-52	T	23-07-2021	IPR036291	NAD(P)-binding domain superfamily
Meg22_1416_Bin_151_Lokiarchaeota	Meg22_1416_Bin_151_scaffold_420_12_53	2b09a685bf274a5b4431dd465f9401f7	390	Pfam	PF00725	3-hydroxyacyl-CoA dehydrogenase, C-terminal domain	194	290	6.7e-17	T	23-07-2021	IPR006108	3-hydroxyacyl-CoA dehydrogenase, C-terminal
Meg22_1416_Bin_151_Lokiarchaeota	Meg22_1416_Bin_151_scaffold_420_12_53	2b09a685bf274a5b4431dd465f9401f7	390	PANTHER	PTHR48075	3-HYDROXYACYL-COA DEHYDROGENASE FAMILY PROTEIN	4	303	4.4e-81	T	23-07-2021	-	-
Meg22_1416_Bin_151_Lokiarchaeota	Meg22_1416_Bin_151_scaffold_420_12_53	2b09a685bf274a5b4431dd465f9401f7	390	Gene3D	G3DSA:3.40.50.720	-	1	197	4.1e-63	T	23-07-2021	-	-
Meg22_1416_Bin_151_Lokiarchaeota	Meg22_1416_Bin_151_scaffold_420_12_53	2b09a685bf274a5b4431dd465f9401f7	390	SUPERFAMILY	SSF48179	6-phosphogluconate dehydrogenase C-terminal domain-like	193	297	1.28e-20	T	23-07-2021	IPR008927	6-phosphogluconate dehydrogenase-like, C-terminal domain superfamily
Meg22_1416_Bin_151_Lokiarchaeota	Meg22_1416_Bin_151_scaffold_420_12_53	2b09a685bf274a5b4431dd465f9401f7	390	ProSiteProfiles	PS51257	Prokaryotic membrane lipoprotein lipid attachment site profile.	1	27	5	T	23-07-2021	-	-
Meg22_1416_Bin_151_Lokiarchaeota	Meg22_1416_Bin_151_scaffold_420_12_53	2b09a685bf274a5b4431dd465f9401f7	390	PANTHER	PTHR48075:SF5	3-HYDROXYACYL-COA DEHYDROGENASE FAMILY PROTEIN	4	303	4.4e-81	T	23-07-2021	-	-
Meg22_1416_Bin_151_Lokiarchaeota	Meg22_1416_Bin_151_scaffold_420_12_53	2b09a685bf274a5b4431dd465f9401f7	390	Pfam	PF02737	3-hydroxyacyl-CoA dehydrogenase, NAD binding domain	7	175	7e-57	T	23-07-2021	IPR006176	3-hydroxyacyl-CoA dehydrogenase, NAD binding
Meg22_1416_Bin_151_Lokiarchaeota	Meg22_1416_Bin_151_scaffold_420_12_53	2b09a685bf274a5b4431dd465f9401f7	390	Gene3D	G3DSA:1.10.1040.50	-	198	389	2e-35	T	23-07-2021	-	-
Meg22_1012_Bin_233_Lokiarchaeota	Meg22_1012_Bin_233_scaffold_2122_35_28	2b09a685bf274a5b4431dd465f9401f7	390	SUPERFAMILY	SSF51735	NAD(P)-binding Rossmann-fold domains	1	176	1.93e-52	T	23-07-2021	IPR036291	NAD(P)-binding domain superfamily
Meg22_1012_Bin_233_Lokiarchaeota	Meg22_1012_Bin_233_scaffold_2122_35_28	2b09a685bf274a5b4431dd465f9401f7	390	Pfam	PF00725	3-hydroxyacyl-CoA dehydrogenase, C-terminal domain	194	290	6.7e-17	T	23-07-2021	IPR006108	3-hydroxyacyl-CoA dehydrogenase, C-terminal
Meg22_1012_Bin_233_Lokiarchaeota	Meg22_1012_Bin_233_scaffold_2122_35_28	2b09a685bf274a5b4431dd465f9401f7	390	PANTHER	PTHR48075	3-HYDROXYACYL-COA DEHYDROGENASE FAMILY PROTEIN	4	303	4.4e-81	T	23-07-2021	-	-
Meg22_1012_Bin_233_Lokiarchaeota	Meg22_1012_Bin_233_scaffold_2122_35_28	2b09a685bf274a5b4431dd465f9401f7	390	Gene3D	G3DSA:3.40.50.720	-	1	197	4.1e-63	T	23-07-2021	-	-
Meg22_1012_Bin_233_Lokiarchaeota	Meg22_1012_Bin_233_scaffold_2122_35_28	2b09a685bf274a5b4431dd465f9401f7	390	SUPERFAMILY	SSF48179	6-phosphogluconate dehydrogenase C-terminal domain-like	193	297	1.28e-20	T	23-07-2021	IPR008927	6-phosphogluconate dehydrogenase-like, C-terminal domain superfamily
Meg22_1012_Bin_233_Lokiarchaeota	Meg22_1012_Bin_233_scaffold_2122_35_28	2b09a685bf274a5b4431dd465f9401f7	390	ProSiteProfiles	PS51257	Prokaryotic membrane lipoprotein lipid attachment site profile.	1	27	5	T	23-07-2021	-	-
Meg22_1012_Bin_233_Lokiarchaeota	Meg22_1012_Bin_233_scaffold_2122_35_28	2b09a685bf274a5b4431dd465f9401f7	390	PANTHER	PTHR48075:SF5	3-HYDROXYACYL-COA DEHYDROGENASE FAMILY PROTEIN	4	303	4.4e-81	T	23-07-2021	-	-
Meg22_1012_Bin_233_Lokiarchaeota	Meg22_1012_Bin_233_scaffold_2122_35_28	2b09a685bf274a5b4431dd465f9401f7	390	Pfam	PF02737	3-hydroxyacyl-CoA dehydrogenase, NAD binding domain	7	175	7e-57	T	23-07-2021	IPR006176	3-hydroxyacyl-CoA dehydrogenase, NAD binding
Meg22_1012_Bin_233_Lokiarchaeota	Meg22_1012_Bin_233_scaffold_2122_35_28	2b09a685bf274a5b4431dd465f9401f7	390	Gene3D	G3DSA:1.10.1040.50	-	198	389	2e-35	T	23-07-2021	-	-
Meg22_1214_Bin_191_Lokiarchaeota	Meg22_1214_Bin_191_scaffold_2414_28_28	2b09a685bf274a5b4431dd465f9401f7	390	SUPERFAMILY	SSF51735	NAD(P)-binding Rossmann-fold domains	1	176	1.93e-52	T	23-07-2021	IPR036291	NAD(P)-binding domain superfamily
Meg22_1214_Bin_191_Lokiarchaeota	Meg22_1214_Bin_191_scaffold_2414_28_28	2b09a685bf274a5b4431dd465f9401f7	390	Pfam	PF00725	3-hydroxyacyl-CoA dehydrogenase, C-terminal domain	194	290	6.7e-17	T	23-07-2021	IPR006108	3-hydroxyacyl-CoA dehydrogenase, C-terminal
Meg22_1214_Bin_191_Lokiarchaeota	Meg22_1214_Bin_191_scaffold_2414_28_28	2b09a685bf274a5b4431dd465f9401f7	390	PANTHER	PTHR48075	3-HYDROXYACYL-COA DEHYDROGENASE FAMILY PROTEIN	4	303	4.4e-81	T	23-07-2021	-	-
Meg22_1214_Bin_191_Lokiarchaeota	Meg22_1214_Bin_191_scaffold_2414_28_28	2b09a685bf274a5b4431dd465f9401f7	390	Gene3D	G3DSA:3.40.50.720	-	1	197	4.1e-63	T	23-07-2021	-	-
Meg22_1214_Bin_191_Lokiarchaeota	Meg22_1214_Bin_191_scaffold_2414_28_28	2b09a685bf274a5b4431dd465f9401f7	390	SUPERFAMILY	SSF48179	6-phosphogluconate dehydrogenase C-terminal domain-like	193	297	1.28e-20	T	23-07-2021	IPR008927	6-phosphogluconate dehydrogenase-like, C-terminal domain superfamily
Meg22_1214_Bin_191_Lokiarchaeota	Meg22_1214_Bin_191_scaffold_2414_28_28	2b09a685bf274a5b4431dd465f9401f7	390	ProSiteProfiles	PS51257	Prokaryotic membrane lipoprotein lipid attachment site profile.	1	27	5	T	23-07-2021	-	-
Meg22_1214_Bin_191_Lokiarchaeota	Meg22_1214_Bin_191_scaffold_2414_28_28	2b09a685bf274a5b4431dd465f9401f7	390	PANTHER	PTHR48075:SF5	3-HYDROXYACYL-COA DEHYDROGENASE FAMILY PROTEIN	4	303	4.4e-81	T	23-07-2021	-	-
Meg22_1214_Bin_191_Lokiarchaeota	Meg22_1214_Bin_191_scaffold_2414_28_28	2b09a685bf274a5b4431dd465f9401f7	390	Pfam	PF02737	3-hydroxyacyl-CoA dehydrogenase, NAD binding domain	7	175	7e-57	T	23-07-2021	IPR006176	3-hydroxyacyl-CoA dehydrogenase, NAD binding
Meg22_1214_Bin_191_Lokiarchaeota	Meg22_1214_Bin_191_scaffold_2414_28_28	2b09a685bf274a5b4431dd465f9401f7	390	Gene3D	G3DSA:1.10.1040.50	-	198	389	2e-35	T	23-07-2021	-	-
Meg19_1012_Bin_504_Helarchaeota	Meg19_1012_Bin_504_scaffold_5341_51_9	ef65804afde5e69d73338126aaed1e36	345	SUPERFAMILY	SSF51726	UROD/MetE-like	4	345	3.31e-47	T	23-07-2021	IPR038071	UROD/MetE-like superfamily
Meg19_1012_Bin_504_Helarchaeota	Meg19_1012_Bin_504_scaffold_5341_51_9	ef65804afde5e69d73338126aaed1e36	345	Gene3D	G3DSA:3.20.20.210	-	1	342	3.5e-57	T	23-07-2021	IPR038071	UROD/MetE-like superfamily
Meg19_1012_Bin_504_Helarchaeota	Meg19_1012_Bin_504_scaffold_5341_51_9	ef65804afde5e69d73338126aaed1e36	345	CDD	cd03465	URO-D_like	12	341	1.45797e-64	T	23-07-2021	-	-
Meg19_1012_Bin_504_Helarchaeota	Meg19_1012_Bin_504_scaffold_5341_51_9	ef65804afde5e69d73338126aaed1e36	345	Pfam	PF01208	Uroporphyrinogen decarboxylase (URO-D)	9	338	1.6e-50	T	23-07-2021	IPR000257	Uroporphyrinogen decarboxylase (URO-D)
Meg19_1012_Bin_504_Helarchaeota	Meg19_1012_Bin_504_scaffold_5341_51_9	ef65804afde5e69d73338126aaed1e36	345	PANTHER	PTHR47099	METHYLCOBAMIDE:COM METHYLTRANSFERASE MTBA	4	344	3.9e-46	T	23-07-2021	-	-
Meg19_1012_Bin_504_Helarchaeota	Meg19_1012_Bin_504_scaffold_2750_35_1	64bf4b804426ce8e82409c2c8979b77e	23	Gene3D	G3DSA:3.40.50.300	-	1	23	6.9e-07	T	23-07-2021	-	-
Meg19_1012_Bin_504_Helarchaeota	Meg19_1012_Bin_504_scaffold_2750_35_1	64bf4b804426ce8e82409c2c8979b77e	23	SUPERFAMILY	SSF52540	P-loop containing nucleoside triphosphate hydrolases	1	23	5.59e-06	T	23-07-2021	IPR027417	P-loop containing nucleoside triphosphate hydrolase
Meg19_1012_Bin_504_Helarchaeota	Meg19_1012_Bin_504_scaffold_1723_21_2	c7d7849edf44aaed492d4463faa52e79	291	PRINTS	PR00300	ATP-dependent Clp protease ATP-binding subunit signature	52	70	7.2e-05	T	23-07-2021	IPR001270	ClpA/B family
Meg19_1012_Bin_504_Helarchaeota	Meg19_1012_Bin_504_scaffold_1723_21_2	c7d7849edf44aaed492d4463faa52e79	291	PRINTS	PR00300	ATP-dependent Clp protease ATP-binding subunit signature	120	138	7.2e-05	T	23-07-2021	IPR001270	ClpA/B family
Meg19_1012_Bin_504_Helarchaeota	Meg19_1012_Bin_504_scaffold_1723_21_2	c7d7849edf44aaed492d4463faa52e79	291	PANTHER	PTHR42759	MOXR FAMILY PROTEIN	25	226	9.7e-31	T	23-07-2021	-	-
Meg19_1012_Bin_504_Helarchaeota	Meg19_1012_Bin_504_scaffold_1723_21_2	c7d7849edf44aaed492d4463faa52e79	291	SMART	SM00382	AAA_5	48	198	6.3e-11	T	23-07-2021	IPR003593	AAA+ ATPase domain
Meg19_1012_Bin_504_Helarchaeota	Meg19_1012_Bin_504_scaffold_1723_21_2	c7d7849edf44aaed492d4463faa52e79	291	Pfam	PF07728	AAA domain (dynein-related subfamily)	51	188	5.5e-29	T	23-07-2021	IPR011704	ATPase, dynein-related, AAA domain
Meg19_1012_Bin_504_Helarchaeota	Meg19_1012_Bin_504_scaffold_1723_21_2	c7d7849edf44aaed492d4463faa52e79	291	CDD	cd00009	AAA	44	196	3.64507e-14	T	23-07-2021	-	-
Meg19_1012_Bin_504_Helarchaeota	Meg19_1012_Bin_504_scaffold_1723_21_2	c7d7849edf44aaed492d4463faa52e79	291	Pfam	PF08406	CbbQ/NirQ/NorQ C-terminal	202	287	4.9e-09	T	23-07-2021	IPR013615	CbbQ/NirQ/NorQ, C-terminal
Meg19_1012_Bin_504_Helarchaeota	Meg19_1012_Bin_504_scaffold_1723_21_2	c7d7849edf44aaed492d4463faa52e79	291	Gene3D	G3DSA:3.40.50.300	-	33	207	1.4e-40	T	23-07-2021	-	-
Meg19_1012_Bin_504_Helarchaeota	Meg19_1012_Bin_504_scaffold_1723_21_2	c7d7849edf44aaed492d4463faa52e79	291	SUPERFAMILY	SSF52540	P-loop containing nucleoside triphosphate hydrolases	19	257	3.61e-42	T	23-07-2021	IPR027417	P-loop containing nucleoside triphosphate hydrolase
Meg22_1416_Bin_151_Lokiarchaeota	Meg22_1416_Bin_151_scaffold_440_15_26	499ac1b3678bb0a7526c945cdc7c0e5d	224	PANTHER	PTHR12636:SF5	RIBOSOMAL RNA SMALL SUBUNIT METHYLTRANSFERASE NEP1	34	218	4.5e-31	T	23-07-2021	-	-
Meg22_1416_Bin_151_Lokiarchaeota	Meg22_1416_Bin_151_scaffold_440_15_26	499ac1b3678bb0a7526c945cdc7c0e5d	224	SUPERFAMILY	SSF75217	alpha/beta knot	3	223	4.58e-51	T	23-07-2021	IPR029028	Alpha/beta knot methyltransferases
Meg22_1416_Bin_151_Lokiarchaeota	Meg22_1416_Bin_151_scaffold_440_15_26	499ac1b3678bb0a7526c945cdc7c0e5d	224	Gene3D	G3DSA:3.40.1280.10	-	1	223	6.5e-62	T	23-07-2021	IPR029026	tRNA (guanine-N1-)-methyltransferase, N-terminal
Meg22_1416_Bin_151_Lokiarchaeota	Meg22_1416_Bin_151_scaffold_440_15_26	499ac1b3678bb0a7526c945cdc7c0e5d	224	Pfam	PF03587	EMG1/NEP1 methyltransferase	6	218	4.1e-48	T	23-07-2021	IPR005304	Ribosomal biogenesis, methyltransferase, EMG1/NEP1
Meg22_1416_Bin_151_Lokiarchaeota	Meg22_1416_Bin_151_scaffold_440_15_26	499ac1b3678bb0a7526c945cdc7c0e5d	224	CDD	cd18088	Nep1-like	3	218	7.68e-65	T	23-07-2021	IPR005304	Ribosomal biogenesis, methyltransferase, EMG1/NEP1
Meg22_1416_Bin_151_Lokiarchaeota	Meg22_1416_Bin_151_scaffold_440_15_26	499ac1b3678bb0a7526c945cdc7c0e5d	224	Hamap	MF_00554	Ribosomal RNA small subunit methyltransferase Nep1 [nep1].	3	219	27.7514	T	23-07-2021	IPR023503	Ribosome biogenesis methyltransferase NEP1, archaea
Meg22_1416_Bin_151_Lokiarchaeota	Meg22_1416_Bin_151_scaffold_440_15_26	499ac1b3678bb0a7526c945cdc7c0e5d	224	PANTHER	PTHR12636	NEP1/MRA1	34	218	4.5e-31	T	23-07-2021	IPR005304	Ribosomal biogenesis, methyltransferase, EMG1/NEP1
Meg22_1012_Bin_233_Lokiarchaeota	Meg22_1012_Bin_233_scaffold_21_5_47	499ac1b3678bb0a7526c945cdc7c0e5d	224	PANTHER	PTHR12636:SF5	RIBOSOMAL RNA SMALL SUBUNIT METHYLTRANSFERASE NEP1	34	218	4.5e-31	T	23-07-2021	-	-
Meg22_1012_Bin_233_Lokiarchaeota	Meg22_1012_Bin_233_scaffold_21_5_47	499ac1b3678bb0a7526c945cdc7c0e5d	224	SUPERFAMILY	SSF75217	alpha/beta knot	3	223	4.58e-51	T	23-07-2021	IPR029028	Alpha/beta knot methyltransferases
Meg22_1012_Bin_233_Lokiarchaeota	Meg22_1012_Bin_233_scaffold_21_5_47	499ac1b3678bb0a7526c945cdc7c0e5d	224	Gene3D	G3DSA:3.40.1280.10	-	1	223	6.5e-62	T	23-07-2021	IPR029026	tRNA (guanine-N1-)-methyltransferase, N-terminal
Meg22_1012_Bin_233_Lokiarchaeota	Meg22_1012_Bin_233_scaffold_21_5_47	499ac1b3678bb0a7526c945cdc7c0e5d	224	Pfam	PF03587	EMG1/NEP1 methyltransferase	6	218	4.1e-48	T	23-07-2021	IPR005304	Ribosomal biogenesis, methyltransferase, EMG1/NEP1
Meg22_1012_Bin_233_Lokiarchaeota	Meg22_1012_Bin_233_scaffold_21_5_47	499ac1b3678bb0a7526c945cdc7c0e5d	224	CDD	cd18088	Nep1-like	3	218	7.68e-65	T	23-07-2021	IPR005304	Ribosomal biogenesis, methyltransferase, EMG1/NEP1
Meg22_1012_Bin_233_Lokiarchaeota	Meg22_1012_Bin_233_scaffold_21_5_47	499ac1b3678bb0a7526c945cdc7c0e5d	224	Hamap	MF_00554	Ribosomal RNA small subunit methyltransferase Nep1 [nep1].	3	219	27.7514	T	23-07-2021	IPR023503	Ribosome biogenesis methyltransferase NEP1, archaea
Meg22_1012_Bin_233_Lokiarchaeota	Meg22_1012_Bin_233_scaffold_21_5_47	499ac1b3678bb0a7526c945cdc7c0e5d	224	PANTHER	PTHR12636	NEP1/MRA1	34	218	4.5e-31	T	23-07-2021	IPR005304	Ribosomal biogenesis, methyltransferase, EMG1/NEP1
Meg22_1214_Bin_191_Lokiarchaeota	Meg22_1214_Bin_191_scaffold_107_1_32	499ac1b3678bb0a7526c945cdc7c0e5d	224	PANTHER	PTHR12636:SF5	RIBOSOMAL RNA SMALL SUBUNIT METHYLTRANSFERASE NEP1	34	218	4.5e-31	T	23-07-2021	-	-
Meg22_1214_Bin_191_Lokiarchaeota	Meg22_1214_Bin_191_scaffold_107_1_32	499ac1b3678bb0a7526c945cdc7c0e5d	224	SUPERFAMILY	SSF75217	alpha/beta knot	3	223	4.58e-51	T	23-07-2021	IPR029028	Alpha/beta knot methyltransferases
Meg22_1214_Bin_191_Lokiarchaeota	Meg22_1214_Bin_191_scaffold_107_1_32	499ac1b3678bb0a7526c945cdc7c0e5d	224	Gene3D	G3DSA:3.40.1280.10	-	1	223	6.5e-62	T	23-07-2021	IPR029026	tRNA (guanine-N1-)-methyltransferase, N-terminal
Meg22_1214_Bin_191_Lokiarchaeota	Meg22_1214_Bin_191_scaffold_107_1_32	499ac1b3678bb0a7526c945cdc7c0e5d	224	Pfam	PF03587	EMG1/NEP1 methyltransferase	6	218	4.1e-48	T	23-07-2021	IPR005304	Ribosomal biogenesis, methyltransferase, EMG1/NEP1
Meg22_1214_Bin_191_Lokiarchaeota	Meg22_1214_Bin_191_scaffold_107_1_32	499ac1b3678bb0a7526c945cdc7c0e5d	224	CDD	cd18088	Nep1-like	3	218	7.68e-65	T	23-07-2021	IPR005304	Ribosomal biogenesis, methyltransferase, EMG1/NEP1
Meg22_1214_Bin_191_Lokiarchaeota	Meg22_1214_Bin_191_scaffold_107_1_32	499ac1b3678bb0a7526c945cdc7c0e5d	224	Hamap	MF_00554	Ribosomal RNA small subunit methyltransferase Nep1 [nep1].	3	219	27.7514	T	23-07-2021	IPR023503	Ribosome biogenesis methyltransferase NEP1, archaea
Meg22_1214_Bin_191_Lokiarchaeota	Meg22_1214_Bin_191_scaffold_107_1_32	499ac1b3678bb0a7526c945cdc7c0e5d	224	PANTHER	PTHR12636	NEP1/MRA1	34	218	4.5e-31	T	23-07-2021	IPR005304	Ribosomal biogenesis, methyltransferase, EMG1/NEP1
Meg22_1214_Bin_191_Lokiarchaeota	Meg22_1214_Bin_191_scaffold_5662_48_7	a4332d37d923394920242a87d2576d61	273	Pfam	PF02596	Uncharacterised ArCR, COG2043	17	226	3e-44	T	23-07-2021	IPR003748	Protein of unknown function DUF169
Meg22_1214_Bin_191_Lokiarchaeota	Meg22_1214_Bin_191_scaffold_5662_48_7	a4332d37d923394920242a87d2576d61	273	PANTHER	PTHR37954	BLL4979 PROTEIN	3	245	2.2e-37	T	23-07-2021	IPR003748	Protein of unknown function DUF169
Meg22_1214_Bin_191_Lokiarchaeota	Meg22_1214_Bin_191_scaffold_2470_30_7	cc720942b0c855acba536d2b452bdb16	427	ProSiteProfiles	PS50850	Major facilitator superfamily (MFS) profile.	1	419	23.798	T	23-07-2021	IPR020846	Major facilitator superfamily domain
Meg22_1214_Bin_191_Lokiarchaeota	Meg22_1214_Bin_191_scaffold_2470_30_7	cc720942b0c855acba536d2b452bdb16	427	SUPERFAMILY	SSF103473	MFS general substrate transporter	5	422	3.79e-51	T	23-07-2021	IPR036259	MFS transporter superfamily
Meg22_1214_Bin_191_Lokiarchaeota	Meg22_1214_Bin_191_scaffold_2470_30_7	cc720942b0c855acba536d2b452bdb16	427	Pfam	PF07690	Major Facilitator Superfamily	37	279	5.2e-23	T	23-07-2021	IPR011701	Major facilitator superfamily
Meg22_1214_Bin_191_Lokiarchaeota	Meg22_1214_Bin_191_scaffold_2470_30_7	cc720942b0c855acba536d2b452bdb16	427	Gene3D	G3DSA:1.20.1250.20	MFS general substrate transporter like domains	222	426	8.2e-26	T	23-07-2021	-	-
Meg22_1214_Bin_191_Lokiarchaeota	Meg22_1214_Bin_191_scaffold_2470_30_7	cc720942b0c855acba536d2b452bdb16	427	Gene3D	G3DSA:1.20.1250.20	MFS general substrate transporter like domains	5	221	8.6e-18	T	23-07-2021	-	-
Meg22_1214_Bin_191_Lokiarchaeota	Meg22_1214_Bin_191_scaffold_2470_30_7	cc720942b0c855acba536d2b452bdb16	427	PANTHER	PTHR43414	MULTIDRUG RESISTANCE PROTEIN MDTG	38	382	2.2e-22	T	23-07-2021	-	-
Meg22_1416_Bin_151_Lokiarchaeota	Meg22_1416_Bin_151_scaffold_392_10_39	cc720942b0c855acba536d2b452bdb16	427	ProSiteProfiles	PS50850	Major facilitator superfamily (MFS) profile.	1	419	23.798	T	23-07-2021	IPR020846	Major facilitator superfamily domain
Meg22_1416_Bin_151_Lokiarchaeota	Meg22_1416_Bin_151_scaffold_392_10_39	cc720942b0c855acba536d2b452bdb16	427	SUPERFAMILY	SSF103473	MFS general substrate transporter	5	422	3.79e-51	T	23-07-2021	IPR036259	MFS transporter superfamily
Meg22_1416_Bin_151_Lokiarchaeota	Meg22_1416_Bin_151_scaffold_392_10_39	cc720942b0c855acba536d2b452bdb16	427	Pfam	PF07690	Major Facilitator Superfamily	37	279	5.2e-23	T	23-07-2021	IPR011701	Major facilitator superfamily
Meg22_1416_Bin_151_Lokiarchaeota	Meg22_1416_Bin_151_scaffold_392_10_39	cc720942b0c855acba536d2b452bdb16	427	Gene3D	G3DSA:1.20.1250.20	MFS general substrate transporter like domains	222	426	8.2e-26	T	23-07-2021	-	-
Meg22_1416_Bin_151_Lokiarchaeota	Meg22_1416_Bin_151_scaffold_392_10_39	cc720942b0c855acba536d2b452bdb16	427	Gene3D	G3DSA:1.20.1250.20	MFS general substrate transporter like domains	5	221	8.6e-18	T	23-07-2021	-	-
Meg22_1416_Bin_151_Lokiarchaeota	Meg22_1416_Bin_151_scaffold_392_10_39	cc720942b0c855acba536d2b452bdb16	427	PANTHER	PTHR43414	MULTIDRUG RESISTANCE PROTEIN MDTG	38	382	2.2e-22	T	23-07-2021	-	-
Meg22_1012_Bin_233_Lokiarchaeota	Meg22_1012_Bin_233_scaffold_1145_27_22	81dcbd98283289ae44997b2aa8014a31	147	CDD	cd14498	DSP	4	133	4.58431e-32	T	23-07-2021	-	-
Meg22_1012_Bin_233_Lokiarchaeota	Meg22_1012_Bin_233_scaffold_1145_27_22	81dcbd98283289ae44997b2aa8014a31	147	SMART	SM00195	dsp_5	3	140	6.3e-18	T	23-07-2021	IPR020422	Dual specificity protein phosphatase domain
Meg22_1012_Bin_233_Lokiarchaeota	Meg22_1012_Bin_233_scaffold_1145_27_22	81dcbd98283289ae44997b2aa8014a31	147	ProSiteProfiles	PS50056	Tyrosine specific protein phosphatases family profile.	64	122	10.921	T	23-07-2021	IPR000387	Tyrosine specific protein phosphatases domain
Meg22_1012_Bin_233_Lokiarchaeota	Meg22_1012_Bin_233_scaffold_1145_27_22	81dcbd98283289ae44997b2aa8014a31	147	Pfam	PF00782	Dual specificity phosphatase, catalytic domain	11	138	8.1e-20	T	23-07-2021	-	-
Meg22_1012_Bin_233_Lokiarchaeota	Meg22_1012_Bin_233_scaffold_1145_27_22	81dcbd98283289ae44997b2aa8014a31	147	SUPERFAMILY	SSF52799	(Phosphotyrosine protein) phosphatases II	2	138	9.34e-33	T	23-07-2021	IPR029021	Protein-tyrosine phosphatase-like
Meg22_1012_Bin_233_Lokiarchaeota	Meg22_1012_Bin_233_scaffold_1145_27_22	81dcbd98283289ae44997b2aa8014a31	147	ProSiteProfiles	PS50054	Dual specificity protein phosphatase family profile.	3	142	18.17	T	23-07-2021	IPR020422	Dual specificity protein phosphatase domain
Meg22_1012_Bin_233_Lokiarchaeota	Meg22_1012_Bin_233_scaffold_1145_27_22	81dcbd98283289ae44997b2aa8014a31	147	PANTHER	PTHR10159:SF514	DUAL SPECIFICITY PROTEIN PHOSPHATASE DDB_G0271350-RELATED	8	123	1.8e-18	T	23-07-2021	-	-
Meg22_1012_Bin_233_Lokiarchaeota	Meg22_1012_Bin_233_scaffold_1145_27_22	81dcbd98283289ae44997b2aa8014a31	147	ProSitePatterns	PS00383	Tyrosine specific protein phosphatases active site.	85	95	-	T	23-07-2021	IPR016130	Protein-tyrosine phosphatase, active site
Meg22_1012_Bin_233_Lokiarchaeota	Meg22_1012_Bin_233_scaffold_1145_27_22	81dcbd98283289ae44997b2aa8014a31	147	PANTHER	PTHR10159	DUAL SPECIFICITY PROTEIN PHOSPHATASE	8	123	1.8e-18	T	23-07-2021	-	-
Meg22_1012_Bin_233_Lokiarchaeota	Meg22_1012_Bin_233_scaffold_1145_27_22	81dcbd98283289ae44997b2aa8014a31	147	Gene3D	G3DSA:3.90.190.10	Protein tyrosine phosphatase superfamily	3	146	1e-29	T	23-07-2021	IPR029021	Protein-tyrosine phosphatase-like
Meg22_1416_Bin_151_Lokiarchaeota	Meg22_1416_Bin_151_scaffold_421_13_22	81dcbd98283289ae44997b2aa8014a31	147	CDD	cd14498	DSP	4	133	4.58431e-32	T	23-07-2021	-	-
Meg22_1416_Bin_151_Lokiarchaeota	Meg22_1416_Bin_151_scaffold_421_13_22	81dcbd98283289ae44997b2aa8014a31	147	SMART	SM00195	dsp_5	3	140	6.3e-18	T	23-07-2021	IPR020422	Dual specificity protein phosphatase domain
Meg22_1416_Bin_151_Lokiarchaeota	Meg22_1416_Bin_151_scaffold_421_13_22	81dcbd98283289ae44997b2aa8014a31	147	ProSiteProfiles	PS50056	Tyrosine specific protein phosphatases family profile.	64	122	10.921	T	23-07-2021	IPR000387	Tyrosine specific protein phosphatases domain
Meg22_1416_Bin_151_Lokiarchaeota	Meg22_1416_Bin_151_scaffold_421_13_22	81dcbd98283289ae44997b2aa8014a31	147	Pfam	PF00782	Dual specificity phosphatase, catalytic domain	11	138	8.1e-20	T	23-07-2021	-	-
Meg22_1416_Bin_151_Lokiarchaeota	Meg22_1416_Bin_151_scaffold_421_13_22	81dcbd98283289ae44997b2aa8014a31	147	SUPERFAMILY	SSF52799	(Phosphotyrosine protein) phosphatases II	2	138	9.34e-33	T	23-07-2021	IPR029021	Protein-tyrosine phosphatase-like
Meg22_1416_Bin_151_Lokiarchaeota	Meg22_1416_Bin_151_scaffold_421_13_22	81dcbd98283289ae44997b2aa8014a31	147	ProSiteProfiles	PS50054	Dual specificity protein phosphatase family profile.	3	142	18.17	T	23-07-2021	IPR020422	Dual specificity protein phosphatase domain
Meg22_1416_Bin_151_Lokiarchaeota	Meg22_1416_Bin_151_scaffold_421_13_22	81dcbd98283289ae44997b2aa8014a31	147	PANTHER	PTHR10159:SF514	DUAL SPECIFICITY PROTEIN PHOSPHATASE DDB_G0271350-RELATED	8	123	1.8e-18	T	23-07-2021	-	-
Meg22_1416_Bin_151_Lokiarchaeota	Meg22_1416_Bin_151_scaffold_421_13_22	81dcbd98283289ae44997b2aa8014a31	147	ProSitePatterns	PS00383	Tyrosine specific protein phosphatases active site.	85	95	-	T	23-07-2021	IPR016130	Protein-tyrosine phosphatase, active site
Meg22_1416_Bin_151_Lokiarchaeota	Meg22_1416_Bin_151_scaffold_421_13_22	81dcbd98283289ae44997b2aa8014a31	147	PANTHER	PTHR10159	DUAL SPECIFICITY PROTEIN PHOSPHATASE	8	123	1.8e-18	T	23-07-2021	-	-
Meg22_1416_Bin_151_Lokiarchaeota	Meg22_1416_Bin_151_scaffold_421_13_22	81dcbd98283289ae44997b2aa8014a31	147	Gene3D	G3DSA:3.90.190.10	Protein tyrosine phosphatase superfamily	3	146	1e-29	T	23-07-2021	IPR029021	Protein-tyrosine phosphatase-like
Meg22_1214_Bin_191_Lokiarchaeota	Meg22_1214_Bin_191_scaffold_1524_21_22	81dcbd98283289ae44997b2aa8014a31	147	CDD	cd14498	DSP	4	133	4.58431e-32	T	23-07-2021	-	-
Meg22_1214_Bin_191_Lokiarchaeota	Meg22_1214_Bin_191_scaffold_1524_21_22	81dcbd98283289ae44997b2aa8014a31	147	SMART	SM00195	dsp_5	3	140	6.3e-18	T	23-07-2021	IPR020422	Dual specificity protein phosphatase domain
Meg22_1214_Bin_191_Lokiarchaeota	Meg22_1214_Bin_191_scaffold_1524_21_22	81dcbd98283289ae44997b2aa8014a31	147	ProSiteProfiles	PS50056	Tyrosine specific protein phosphatases family profile.	64	122	10.921	T	23-07-2021	IPR000387	Tyrosine specific protein phosphatases domain
Meg22_1214_Bin_191_Lokiarchaeota	Meg22_1214_Bin_191_scaffold_1524_21_22	81dcbd98283289ae44997b2aa8014a31	147	Pfam	PF00782	Dual specificity phosphatase, catalytic domain	11	138	8.1e-20	T	23-07-2021	-	-
Meg22_1214_Bin_191_Lokiarchaeota	Meg22_1214_Bin_191_scaffold_1524_21_22	81dcbd98283289ae44997b2aa8014a31	147	SUPERFAMILY	SSF52799	(Phosphotyrosine protein) phosphatases II	2	138	9.34e-33	T	23-07-2021	IPR029021	Protein-tyrosine phosphatase-like
Meg22_1214_Bin_191_Lokiarchaeota	Meg22_1214_Bin_191_scaffold_1524_21_22	81dcbd98283289ae44997b2aa8014a31	147	ProSiteProfiles	PS50054	Dual specificity protein phosphatase family profile.	3	142	18.17	T	23-07-2021	IPR020422	Dual specificity protein phosphatase domain
Meg22_1214_Bin_191_Lokiarchaeota	Meg22_1214_Bin_191_scaffold_1524_21_22	81dcbd98283289ae44997b2aa8014a31	147	PANTHER	PTHR10159:SF514	DUAL SPECIFICITY PROTEIN PHOSPHATASE DDB_G0271350-RELATED	8	123	1.8e-18	T	23-07-2021	-	-
Meg22_1214_Bin_191_Lokiarchaeota	Meg22_1214_Bin_191_scaffold_1524_21_22	81dcbd98283289ae44997b2aa8014a31	147	ProSitePatterns	PS00383	Tyrosine specific protein phosphatases active site.	85	95	-	T	23-07-2021	IPR016130	Protein-tyrosine phosphatase, active site
Meg22_1214_Bin_191_Lokiarchaeota	Meg22_1214_Bin_191_scaffold_1524_21_22	81dcbd98283289ae44997b2aa8014a31	147	PANTHER	PTHR10159	DUAL SPECIFICITY PROTEIN PHOSPHATASE	8	123	1.8e-18	T	23-07-2021	-	-
Meg22_1214_Bin_191_Lokiarchaeota	Meg22_1214_Bin_191_scaffold_1524_21_22	81dcbd98283289ae44997b2aa8014a31	147	Gene3D	G3DSA:3.90.190.10	Protein tyrosine phosphatase superfamily	3	146	1e-29	T	23-07-2021	IPR029021	Protein-tyrosine phosphatase-like
Meg19_1012_Bin_504_Helarchaeota	Meg19_1012_Bin_504_scaffold_834_7_1	d9de24fa36a9b928d8e194f380fd4719	415	Pfam	PF13439	Glycosyltransferase Family 4	106	214	3.5e-09	T	23-07-2021	IPR028098	Glycosyltransferase subfamily 4-like, N-terminal domain
Meg19_1012_Bin_504_Helarchaeota	Meg19_1012_Bin_504_scaffold_834_7_1	d9de24fa36a9b928d8e194f380fd4719	415	Gene3D	G3DSA:3.40.50.2000	Glycogen Phosphorylase B;	221	394	7e-31	T	23-07-2021	-	-
Meg19_1012_Bin_504_Helarchaeota	Meg19_1012_Bin_504_scaffold_834_7_1	d9de24fa36a9b928d8e194f380fd4719	415	SUPERFAMILY	SSF53756	UDP-Glycosyltransferase/glycogen phosphorylase	3	414	1.3e-52	T	23-07-2021	-	-
Meg19_1012_Bin_504_Helarchaeota	Meg19_1012_Bin_504_scaffold_834_7_1	d9de24fa36a9b928d8e194f380fd4719	415	Pfam	PF00534	Glycosyl transferases group 1	229	389	1.4e-23	T	23-07-2021	IPR001296	Glycosyl transferase, family 1
Meg19_1012_Bin_504_Helarchaeota	Meg19_1012_Bin_504_scaffold_834_7_1	d9de24fa36a9b928d8e194f380fd4719	415	PANTHER	PTHR45947:SF8	ALPHA-MONOGLUCOSYLDIACYLGLYCEROL SYNTHASE	13	413	1.1e-33	T	23-07-2021	-	-
Meg19_1012_Bin_504_Helarchaeota	Meg19_1012_Bin_504_scaffold_834_7_1	d9de24fa36a9b928d8e194f380fd4719	415	PANTHER	PTHR45947	SULFOQUINOVOSYL TRANSFERASE SQD2	13	413	1.1e-33	T	23-07-2021	-	-
Meg19_1012_Bin_504_Helarchaeota	Meg19_1012_Bin_504_scaffold_834_7_1	d9de24fa36a9b928d8e194f380fd4719	415	CDD	cd03801	GT4_PimA-like	123	411	1.44181e-45	T	23-07-2021	-	-
Meg19_1012_Bin_504_Helarchaeota	Meg19_1012_Bin_504_scaffold_10487_67_12	917e137479db2386a703785abfae96fe	296	SUPERFAMILY	SSF50199	Staphylococcal nuclease	181	290	4.97e-23	T	23-07-2021	-	-
Meg19_1012_Bin_504_Helarchaeota	Meg19_1012_Bin_504_scaffold_10487_67_12	917e137479db2386a703785abfae96fe	296	Pfam	PF00565	Staphylococcal nuclease homologue	203	287	3.4e-14	T	23-07-2021	IPR016071	Staphylococcal nuclease (SNase-like), OB-fold
Meg19_1012_Bin_504_Helarchaeota	Meg19_1012_Bin_504_scaffold_10487_67_12	917e137479db2386a703785abfae96fe	296	CDD	cd04491	SoSSB_OBF	16	94	7.57266e-13	T	23-07-2021	-	-
Meg19_1012_Bin_504_Helarchaeota	Meg19_1012_Bin_504_scaffold_10487_67_12	917e137479db2386a703785abfae96fe	296	SMART	SM00318	SNASE_2	181	293	9.8e-14	T	23-07-2021	IPR016071	Staphylococcal nuclease (SNase-like), OB-fold
Meg19_1012_Bin_504_Helarchaeota	Meg19_1012_Bin_504_scaffold_10487_67_12	917e137479db2386a703785abfae96fe	296	Gene3D	G3DSA:2.40.50.90	-	178	295	3.5e-22	T	23-07-2021	IPR035437	SNase-like, OB-fold superfamily
Meg19_1012_Bin_504_Helarchaeota	Meg19_1012_Bin_504_scaffold_10487_67_12	917e137479db2386a703785abfae96fe	296	PANTHER	PTHR12302:SF3	SERINE/THREONINE-PROTEIN KINASE 31	178	284	4.9e-12	T	23-07-2021	-	-
Meg19_1012_Bin_504_Helarchaeota	Meg19_1012_Bin_504_scaffold_10487_67_12	917e137479db2386a703785abfae96fe	296	ProSitePatterns	PS01284	Thermonuclease family signature 2.	246	256	-	T	23-07-2021	IPR002071	Thermonuclease active site
Meg19_1012_Bin_504_Helarchaeota	Meg19_1012_Bin_504_scaffold_10487_67_12	917e137479db2386a703785abfae96fe	296	SUPERFAMILY	SSF50249	Nucleic acid-binding proteins	3	98	2.48e-17	T	23-07-2021	IPR012340	Nucleic acid-binding, OB-fold
Meg19_1012_Bin_504_Helarchaeota	Meg19_1012_Bin_504_scaffold_10487_67_12	917e137479db2386a703785abfae96fe	296	PANTHER	PTHR12302	EBNA2 BINDING PROTEIN P100	178	284	4.9e-12	T	23-07-2021	-	-
Meg19_1012_Bin_504_Helarchaeota	Meg19_1012_Bin_504_scaffold_10487_67_12	917e137479db2386a703785abfae96fe	296	Gene3D	G3DSA:2.40.50.140	-	3	107	3.4e-20	T	23-07-2021	-	-
Meg19_1012_Bin_504_Helarchaeota	Meg19_1012_Bin_504_scaffold_10487_67_12	917e137479db2386a703785abfae96fe	296	ProSiteProfiles	PS50830	Thermonuclease domain profile.	181	277	24.971	T	23-07-2021	IPR016071	Staphylococcal nuclease (SNase-like), OB-fold
Meg22_1012_Bin_233_Lokiarchaeota	Meg22_1012_Bin_233_scaffold_939_24_31	5ed805247c7c21b6a1e5a9143ac5baa7	391	SUPERFAMILY	SSF52518	Thiamin diphosphate-binding fold (THDP-binding)	14	212	5.43e-58	T	23-07-2021	IPR029061	Thiamin diphosphate-binding fold
Meg22_1012_Bin_233_Lokiarchaeota	Meg22_1012_Bin_233_scaffold_939_24_31	5ed805247c7c21b6a1e5a9143ac5baa7	391	SUPERFAMILY	SSF52922	TK C-terminal domain-like	279	388	7.33e-24	T	23-07-2021	IPR009014	Transketolase C-terminal/Pyruvate-ferredoxin oxidoreductase domain II
Meg22_1012_Bin_233_Lokiarchaeota	Meg22_1012_Bin_233_scaffold_939_24_31	5ed805247c7c21b6a1e5a9143ac5baa7	391	Gene3D	G3DSA:3.40.50.970	-	3	202	1.5e-66	T	23-07-2021	-	-
Meg22_1012_Bin_233_Lokiarchaeota	Meg22_1012_Bin_233_scaffold_939_24_31	5ed805247c7c21b6a1e5a9143ac5baa7	391	CDD	cd07034	TPP_PYR_PFOR_IOR-alpha_like	20	182	1.76632e-59	T	23-07-2021	-	-
Meg22_1012_Bin_233_Lokiarchaeota	Meg22_1012_Bin_233_scaffold_939_24_31	5ed805247c7c21b6a1e5a9143ac5baa7	391	Pfam	PF01855	Pyruvate flavodoxin/ferredoxin oxidoreductase, thiamine diP-bdg	26	211	2e-55	T	23-07-2021	IPR002880	Pyruvate flavodoxin/ferredoxin oxidoreductase, N-terminal
Meg22_1012_Bin_233_Lokiarchaeota	Meg22_1012_Bin_233_scaffold_939_24_31	5ed805247c7c21b6a1e5a9143ac5baa7	391	PANTHER	PTHR32154	PYRUVATE-FLAVODOXIN OXIDOREDUCTASE-RELATED	15	390	3.1e-113	T	23-07-2021	-	-
Meg22_1012_Bin_233_Lokiarchaeota	Meg22_1012_Bin_233_scaffold_939_24_31	5ed805247c7c21b6a1e5a9143ac5baa7	391	Gene3D	G3DSA:3.40.50.920	-	277	390	1.8e-23	T	23-07-2021	IPR009014	Transketolase C-terminal/Pyruvate-ferredoxin oxidoreductase domain II
Meg22_1012_Bin_233_Lokiarchaeota	Meg22_1012_Bin_233_scaffold_939_24_31	5ed805247c7c21b6a1e5a9143ac5baa7	391	PANTHER	PTHR32154:SF14	2-OXOGLUTARATE SYNTHASE SUBUNIT KORA	15	390	3.1e-113	T	23-07-2021	-	-
Meg22_1012_Bin_233_Lokiarchaeota	Meg22_1012_Bin_233_scaffold_939_24_31	5ed805247c7c21b6a1e5a9143ac5baa7	391	Pfam	PF17147	Pyruvate:ferredoxin oxidoreductase core domain II	288	363	3.8e-20	T	23-07-2021	IPR033412	Pyruvate:ferredoxin oxidoreductase, core domain II
Meg22_1416_Bin_151_Lokiarchaeota	Meg22_1416_Bin_151_scaffold_6981_78_11	5ed805247c7c21b6a1e5a9143ac5baa7	391	SUPERFAMILY	SSF52518	Thiamin diphosphate-binding fold (THDP-binding)	14	212	5.43e-58	T	23-07-2021	IPR029061	Thiamin diphosphate-binding fold
Meg22_1416_Bin_151_Lokiarchaeota	Meg22_1416_Bin_151_scaffold_6981_78_11	5ed805247c7c21b6a1e5a9143ac5baa7	391	SUPERFAMILY	SSF52922	TK C-terminal domain-like	279	388	7.33e-24	T	23-07-2021	IPR009014	Transketolase C-terminal/Pyruvate-ferredoxin oxidoreductase domain II
Meg22_1416_Bin_151_Lokiarchaeota	Meg22_1416_Bin_151_scaffold_6981_78_11	5ed805247c7c21b6a1e5a9143ac5baa7	391	Gene3D	G3DSA:3.40.50.970	-	3	202	1.5e-66	T	23-07-2021	-	-
Meg22_1416_Bin_151_Lokiarchaeota	Meg22_1416_Bin_151_scaffold_6981_78_11	5ed805247c7c21b6a1e5a9143ac5baa7	391	CDD	cd07034	TPP_PYR_PFOR_IOR-alpha_like	20	182	1.76632e-59	T	23-07-2021	-	-
Meg22_1416_Bin_151_Lokiarchaeota	Meg22_1416_Bin_151_scaffold_6981_78_11	5ed805247c7c21b6a1e5a9143ac5baa7	391	Pfam	PF01855	Pyruvate flavodoxin/ferredoxin oxidoreductase, thiamine diP-bdg	26	211	2e-55	T	23-07-2021	IPR002880	Pyruvate flavodoxin/ferredoxin oxidoreductase, N-terminal
Meg22_1416_Bin_151_Lokiarchaeota	Meg22_1416_Bin_151_scaffold_6981_78_11	5ed805247c7c21b6a1e5a9143ac5baa7	391	PANTHER	PTHR32154	PYRUVATE-FLAVODOXIN OXIDOREDUCTASE-RELATED	15	390	3.1e-113	T	23-07-2021	-	-
Meg22_1416_Bin_151_Lokiarchaeota	Meg22_1416_Bin_151_scaffold_6981_78_11	5ed805247c7c21b6a1e5a9143ac5baa7	391	Gene3D	G3DSA:3.40.50.920	-	277	390	1.8e-23	T	23-07-2021	IPR009014	Transketolase C-terminal/Pyruvate-ferredoxin oxidoreductase domain II
Meg22_1416_Bin_151_Lokiarchaeota	Meg22_1416_Bin_151_scaffold_6981_78_11	5ed805247c7c21b6a1e5a9143ac5baa7	391	PANTHER	PTHR32154:SF14	2-OXOGLUTARATE SYNTHASE SUBUNIT KORA	15	390	3.1e-113	T	23-07-2021	-	-
Meg22_1416_Bin_151_Lokiarchaeota	Meg22_1416_Bin_151_scaffold_6981_78_11	5ed805247c7c21b6a1e5a9143ac5baa7	391	Pfam	PF17147	Pyruvate:ferredoxin oxidoreductase core domain II	288	363	3.8e-20	T	23-07-2021	IPR033412	Pyruvate:ferredoxin oxidoreductase, core domain II
Meg22_1214_Bin_191_Lokiarchaeota	Meg22_1214_Bin_191_scaffold_11480_70_12	5ed805247c7c21b6a1e5a9143ac5baa7	391	SUPERFAMILY	SSF52518	Thiamin diphosphate-binding fold (THDP-binding)	14	212	5.43e-58	T	23-07-2021	IPR029061	Thiamin diphosphate-binding fold
Meg22_1214_Bin_191_Lokiarchaeota	Meg22_1214_Bin_191_scaffold_11480_70_12	5ed805247c7c21b6a1e5a9143ac5baa7	391	SUPERFAMILY	SSF52922	TK C-terminal domain-like	279	388	7.33e-24	T	23-07-2021	IPR009014	Transketolase C-terminal/Pyruvate-ferredoxin oxidoreductase domain II
Meg22_1214_Bin_191_Lokiarchaeota	Meg22_1214_Bin_191_scaffold_11480_70_12	5ed805247c7c21b6a1e5a9143ac5baa7	391	Gene3D	G3DSA:3.40.50.970	-	3	202	1.5e-66	T	23-07-2021	-	-
Meg22_1214_Bin_191_Lokiarchaeota	Meg22_1214_Bin_191_scaffold_11480_70_12	5ed805247c7c21b6a1e5a9143ac5baa7	391	CDD	cd07034	TPP_PYR_PFOR_IOR-alpha_like	20	182	1.76632e-59	T	23-07-2021	-	-
Meg22_1214_Bin_191_Lokiarchaeota	Meg22_1214_Bin_191_scaffold_11480_70_12	5ed805247c7c21b6a1e5a9143ac5baa7	391	Pfam	PF01855	Pyruvate flavodoxin/ferredoxin oxidoreductase, thiamine diP-bdg	26	211	2e-55	T	23-07-2021	IPR002880	Pyruvate flavodoxin/ferredoxin oxidoreductase, N-terminal
Meg22_1214_Bin_191_Lokiarchaeota	Meg22_1214_Bin_191_scaffold_11480_70_12	5ed805247c7c21b6a1e5a9143ac5baa7	391	PANTHER	PTHR32154	PYRUVATE-FLAVODOXIN OXIDOREDUCTASE-RELATED	15	390	3.1e-113	T	23-07-2021	-	-
Meg22_1214_Bin_191_Lokiarchaeota	Meg22_1214_Bin_191_scaffold_11480_70_12	5ed805247c7c21b6a1e5a9143ac5baa7	391	Gene3D	G3DSA:3.40.50.920	-	277	390	1.8e-23	T	23-07-2021	IPR009014	Transketolase C-terminal/Pyruvate-ferredoxin oxidoreductase domain II
Meg22_1214_Bin_191_Lokiarchaeota	Meg22_1214_Bin_191_scaffold_11480_70_12	5ed805247c7c21b6a1e5a9143ac5baa7	391	PANTHER	PTHR32154:SF14	2-OXOGLUTARATE SYNTHASE SUBUNIT KORA	15	390	3.1e-113	T	23-07-2021	-	-
Meg22_1214_Bin_191_Lokiarchaeota	Meg22_1214_Bin_191_scaffold_11480_70_12	5ed805247c7c21b6a1e5a9143ac5baa7	391	Pfam	PF17147	Pyruvate:ferredoxin oxidoreductase core domain II	288	363	3.8e-20	T	23-07-2021	IPR033412	Pyruvate:ferredoxin oxidoreductase, core domain II
Meg19_1012_Bin_504_Helarchaeota	Meg19_1012_Bin_504_scaffold_1897_25_8	fa9d8d035db5cf087ea21fc1ad0daf56	255	Pfam	PF08704	tRNA methyltransferase complex GCD14 subunit	75	235	5.1e-36	T	23-07-2021	IPR014816	tRNA (1-methyladenosine) methyltransferase catalytic subunit Gcd14
Meg19_1012_Bin_504_Helarchaeota	Meg19_1012_Bin_504_scaffold_1897_25_8	fa9d8d035db5cf087ea21fc1ad0daf56	255	Gene3D	G3DSA:3.40.50.150	Vaccinia Virus protein VP39	66	255	6.5e-66	T	23-07-2021	-	-
Meg19_1012_Bin_504_Helarchaeota	Meg19_1012_Bin_504_scaffold_1897_25_8	fa9d8d035db5cf087ea21fc1ad0daf56	255	PIRSF	PIRSF017269	GCD14	1	255	6.3e-80	T	23-07-2021	IPR014816	tRNA (1-methyladenosine) methyltransferase catalytic subunit Gcd14
Meg19_1012_Bin_504_Helarchaeota	Meg19_1012_Bin_504_scaffold_1897_25_8	fa9d8d035db5cf087ea21fc1ad0daf56	255	ProSiteProfiles	PS51620	tRNA (adenine(57)-N(1)/adenine(58)-N(1) or adenine(58)-N(1)) (EC 2.1.1.219 or EC 2.1.1.220) family profile.	8	254	84.09	T	23-07-2021	IPR014816	tRNA (1-methyladenosine) methyltransferase catalytic subunit Gcd14
Meg19_1012_Bin_504_Helarchaeota	Meg19_1012_Bin_504_scaffold_1897_25_8	fa9d8d035db5cf087ea21fc1ad0daf56	255	PANTHER	PTHR12133	TRNA (ADENINE(58)-N(1))-METHYLTRANSFERASE	3	253	1.5e-63	T	23-07-2021	IPR014816	tRNA (1-methyladenosine) methyltransferase catalytic subunit Gcd14
Meg19_1012_Bin_504_Helarchaeota	Meg19_1012_Bin_504_scaffold_1897_25_8	fa9d8d035db5cf087ea21fc1ad0daf56	255	SUPERFAMILY	SSF53335	S-adenosyl-L-methionine-dependent methyltransferases	4	253	8.36e-70	T	23-07-2021	IPR029063	S-adenosyl-L-methionine-dependent methyltransferase
Meg19_1012_Bin_504_Helarchaeota	Meg19_1012_Bin_504_scaffold_1897_25_8	fa9d8d035db5cf087ea21fc1ad0daf56	255	Gene3D	G3DSA:3.10.330.20	-	4	64	2.1e-22	T	23-07-2021	-	-
Meg19_1012_Bin_504_Helarchaeota	Meg19_1012_Bin_504_scaffold_1897_25_8	fa9d8d035db5cf087ea21fc1ad0daf56	255	CDD	cd02440	AdoMet_MTases	99	194	9.55228e-09	T	23-07-2021	-	-
Meg22_1214_Bin_191_Lokiarchaeota	Meg22_1214_Bin_191_scaffold_941_13_26	bcbbcfdc62e1d15aad63be5d25b85455	169	PANTHER	PTHR35368	HYDROPEROXIDE REDUCTASE	4	166	7e-20	T	23-07-2021	-	-
Meg22_1214_Bin_191_Lokiarchaeota	Meg22_1214_Bin_191_scaffold_941_13_26	bcbbcfdc62e1d15aad63be5d25b85455	169	Pfam	PF02566	OsmC-like protein	59	162	8e-10	T	23-07-2021	IPR003718	OsmC/Ohr family
Meg22_1214_Bin_191_Lokiarchaeota	Meg22_1214_Bin_191_scaffold_941_13_26	bcbbcfdc62e1d15aad63be5d25b85455	169	Gene3D	G3DSA:3.30.300.20	-	1	154	3.4e-29	T	23-07-2021	IPR015946	K homology domain-like, alpha/beta
Meg22_1214_Bin_191_Lokiarchaeota	Meg22_1214_Bin_191_scaffold_941_13_26	bcbbcfdc62e1d15aad63be5d25b85455	169	SUPERFAMILY	SSF82784	OsmC-like	6	165	1.7e-23	T	23-07-2021	IPR036102	OsmC/Ohr superfamily
Meg22_1416_Bin_151_Lokiarchaeota	Meg22_1416_Bin_151_scaffold_829_23_1	bcbbcfdc62e1d15aad63be5d25b85455	169	PANTHER	PTHR35368	HYDROPEROXIDE REDUCTASE	4	166	7e-20	T	23-07-2021	-	-
Meg22_1416_Bin_151_Lokiarchaeota	Meg22_1416_Bin_151_scaffold_829_23_1	bcbbcfdc62e1d15aad63be5d25b85455	169	Pfam	PF02566	OsmC-like protein	59	162	8e-10	T	23-07-2021	IPR003718	OsmC/Ohr family
Meg22_1416_Bin_151_Lokiarchaeota	Meg22_1416_Bin_151_scaffold_829_23_1	bcbbcfdc62e1d15aad63be5d25b85455	169	Gene3D	G3DSA:3.30.300.20	-	1	154	3.4e-29	T	23-07-2021	IPR015946	K homology domain-like, alpha/beta
Meg22_1416_Bin_151_Lokiarchaeota	Meg22_1416_Bin_151_scaffold_829_23_1	bcbbcfdc62e1d15aad63be5d25b85455	169	SUPERFAMILY	SSF82784	OsmC-like	6	165	1.7e-23	T	23-07-2021	IPR036102	OsmC/Ohr superfamily
Meg22_1012_Bin_233_Lokiarchaeota	Meg22_1012_Bin_233_scaffold_193_17_48	bcbbcfdc62e1d15aad63be5d25b85455	169	PANTHER	PTHR35368	HYDROPEROXIDE REDUCTASE	4	166	7e-20	T	23-07-2021	-	-
Meg22_1012_Bin_233_Lokiarchaeota	Meg22_1012_Bin_233_scaffold_193_17_48	bcbbcfdc62e1d15aad63be5d25b85455	169	Pfam	PF02566	OsmC-like protein	59	162	8e-10	T	23-07-2021	IPR003718	OsmC/Ohr family
Meg22_1012_Bin_233_Lokiarchaeota	Meg22_1012_Bin_233_scaffold_193_17_48	bcbbcfdc62e1d15aad63be5d25b85455	169	Gene3D	G3DSA:3.30.300.20	-	1	154	3.4e-29	T	23-07-2021	IPR015946	K homology domain-like, alpha/beta
Meg22_1012_Bin_233_Lokiarchaeota	Meg22_1012_Bin_233_scaffold_193_17_48	bcbbcfdc62e1d15aad63be5d25b85455	169	SUPERFAMILY	SSF82784	OsmC-like	6	165	1.7e-23	T	23-07-2021	IPR036102	OsmC/Ohr superfamily
Meg22_1012_Bin_233_Lokiarchaeota	Meg22_1012_Bin_233_scaffold_192_16_76	ce1c203a906dbc367a93cdb5365281e7	110	SUPERFAMILY	SSF144052	Thermophilic metalloprotease-like	21	83	1.83e-07	T	23-07-2021	-	-
Meg22_1214_Bin_191_Lokiarchaeota	Meg22_1214_Bin_191_scaffold_3058_34_45	ce1c203a906dbc367a93cdb5365281e7	110	SUPERFAMILY	SSF144052	Thermophilic metalloprotease-like	21	83	1.83e-07	T	23-07-2021	-	-
Meg22_1416_Bin_151_Lokiarchaeota	Meg22_1416_Bin_151_scaffold_3107_59_4	ce1c203a906dbc367a93cdb5365281e7	110	SUPERFAMILY	SSF144052	Thermophilic metalloprotease-like	21	83	1.83e-07	T	23-07-2021	-	-
Meg22_1214_Bin_191_Lokiarchaeota	Meg22_1214_Bin_191_scaffold_126123_178_5	bfede00c83f8010de96da512289e6260	326	Pfam	PF11300	Protein of unknown function (DUF3102)	13	78	6.3e-07	T	23-07-2021	IPR021451	Protein of unknown function DUF3102
Meg22_1214_Bin_191_Lokiarchaeota	Meg22_1214_Bin_191_scaffold_126123_178_5	bfede00c83f8010de96da512289e6260	326	Gene3D	G3DSA:3.40.50.150	Vaccinia Virus protein VP39	128	326	1.2e-33	T	23-07-2021	-	-
Meg22_1214_Bin_191_Lokiarchaeota	Meg22_1214_Bin_191_scaffold_126123_178_5	bfede00c83f8010de96da512289e6260	326	ProSitePatterns	PS00092	N-6 Adenine-specific DNA methylases signature.	153	159	-	T	23-07-2021	IPR002052	DNA methylase, N-6 adenine-specific, conserved site
Meg22_1214_Bin_191_Lokiarchaeota	Meg22_1214_Bin_191_scaffold_126123_178_5	bfede00c83f8010de96da512289e6260	326	Pfam	PF01555	DNA methylase	38	320	1.3e-11	T	23-07-2021	IPR002941	DNA methylase N-4/N-6
Meg22_1214_Bin_191_Lokiarchaeota	Meg22_1214_Bin_191_scaffold_126123_178_5	bfede00c83f8010de96da512289e6260	326	PRINTS	PR00508	S21 class N4 adenine-specific DNA methyltransferase signature	149	163	6.9e-19	T	23-07-2021	IPR001091	Restriction/modification DNA-methylase
Meg22_1214_Bin_191_Lokiarchaeota	Meg22_1214_Bin_191_scaffold_126123_178_5	bfede00c83f8010de96da512289e6260	326	PRINTS	PR00508	S21 class N4 adenine-specific DNA methyltransferase signature	262	279	6.9e-19	T	23-07-2021	IPR001091	Restriction/modification DNA-methylase
Meg22_1214_Bin_191_Lokiarchaeota	Meg22_1214_Bin_191_scaffold_126123_178_5	bfede00c83f8010de96da512289e6260	326	PRINTS	PR00508	S21 class N4 adenine-specific DNA methyltransferase signature	281	299	6.9e-19	T	23-07-2021	IPR001091	Restriction/modification DNA-methylase
Meg22_1214_Bin_191_Lokiarchaeota	Meg22_1214_Bin_191_scaffold_126123_178_5	bfede00c83f8010de96da512289e6260	326	PRINTS	PR00508	S21 class N4 adenine-specific DNA methyltransferase signature	170	190	6.9e-19	T	23-07-2021	IPR001091	Restriction/modification DNA-methylase
Meg22_1214_Bin_191_Lokiarchaeota	Meg22_1214_Bin_191_scaffold_126123_178_5	bfede00c83f8010de96da512289e6260	326	PRINTS	PR00508	S21 class N4 adenine-specific DNA methyltransferase signature	304	324	6.9e-19	T	23-07-2021	IPR001091	Restriction/modification DNA-methylase
Meg22_1214_Bin_191_Lokiarchaeota	Meg22_1214_Bin_191_scaffold_126123_178_5	bfede00c83f8010de96da512289e6260	326	SUPERFAMILY	SSF53335	S-adenosyl-L-methionine-dependent methyltransferases	138	324	1.96e-33	T	23-07-2021	IPR029063	S-adenosyl-L-methionine-dependent methyltransferase
Meg22_1214_Bin_191_Lokiarchaeota	Meg22_1214_Bin_191_scaffold_126123_178_5	bfede00c83f8010de96da512289e6260	326	Coils	Coil	Coil	99	121	-	T	23-07-2021	-	-
Meg22_1416_Bin_151_Lokiarchaeota	Meg22_1416_Bin_151_scaffold_250_7_58	c3db36e943cdeef23616fc14562edac3	76	Coils	Coil	Coil	29	49	-	T	23-07-2021	-	-
Meg22_1416_Bin_151_Lokiarchaeota	Meg22_1416_Bin_151_scaffold_1044_28_7	526636d65ced2f77ebbd846442bf5fe4	545	Pfam	PF01154	Hydroxymethylglutaryl-coenzyme A synthase N terminal	10	173	8e-21	T	23-07-2021	IPR013528	Hydroxymethylglutaryl-coenzyme A synthase, N-terminal
Meg22_1416_Bin_151_Lokiarchaeota	Meg22_1416_Bin_151_scaffold_1044_28_7	526636d65ced2f77ebbd846442bf5fe4	545	SUPERFAMILY	SSF53901	Thiolase-like	185	415	1.38e-26	T	23-07-2021	IPR016039	Thiolase-like
Meg22_1416_Bin_151_Lokiarchaeota	Meg22_1416_Bin_151_scaffold_1044_28_7	526636d65ced2f77ebbd846442bf5fe4	545	Pfam	PF08540	Hydroxymethylglutaryl-coenzyme A synthase C terminal	192	374	2.9e-08	T	23-07-2021	IPR013746	Hydroxymethylglutaryl-coenzyme A synthase, C-terminal domain
Meg22_1416_Bin_151_Lokiarchaeota	Meg22_1416_Bin_151_scaffold_1044_28_7	526636d65ced2f77ebbd846442bf5fe4	545	Gene3D	G3DSA:3.40.47.10	-	8	428	9.3e-91	T	23-07-2021	IPR016039	Thiolase-like
Meg22_1416_Bin_151_Lokiarchaeota	Meg22_1416_Bin_151_scaffold_1044_28_7	526636d65ced2f77ebbd846442bf5fe4	545	PANTHER	PTHR43323	3-HYDROXY-3-METHYLGLUTARYL COENZYME A SYNTHASE	10	378	3.8e-24	T	23-07-2021	-	-
Meg22_1416_Bin_151_Lokiarchaeota	Meg22_1416_Bin_151_scaffold_1044_28_7	526636d65ced2f77ebbd846442bf5fe4	545	SUPERFAMILY	SSF53901	Thiolase-like	10	176	3.23e-39	T	23-07-2021	IPR016039	Thiolase-like
Meg22_1416_Bin_151_Lokiarchaeota	Meg22_1416_Bin_151_scaffold_1044_28_7	526636d65ced2f77ebbd846442bf5fe4	545	CDD	cd00827	init_cond_enzymes	10	372	3.68388e-51	T	23-07-2021	-	-
Meg22_1416_Bin_151_Lokiarchaeota	Meg22_1416_Bin_151_scaffold_1044_28_7	526636d65ced2f77ebbd846442bf5fe4	545	PANTHER	PTHR43323:SF17	3-HYDROXY-3-METHYLGLUTARYL COENZYME A SYNTHASE	10	378	3.8e-24	T	23-07-2021	-	-
Meg22_1012_Bin_233_Lokiarchaeota	Meg22_1012_Bin_233_scaffold_2698_38_34	dc505f45ae10a55fedbbf6621109884b	674	SUPERFAMILY	SSF51905	FAD/NAD(P)-binding domain	160	579	4.66e-27	T	23-07-2021	IPR036188	FAD/NAD(P)-binding domain superfamily
Meg22_1012_Bin_233_Lokiarchaeota	Meg22_1012_Bin_233_scaffold_2698_38_34	dc505f45ae10a55fedbbf6621109884b	674	Pfam	PF13187	4Fe-4S dicluster domain	600	646	1.6e-09	T	23-07-2021	IPR017896	4Fe-4S ferredoxin-type, iron-sulphur binding domain
Meg22_1012_Bin_233_Lokiarchaeota	Meg22_1012_Bin_233_scaffold_2698_38_34	dc505f45ae10a55fedbbf6621109884b	674	SUPERFAMILY	SSF54862	4Fe-4S ferredoxins	589	650	8.7e-18	T	23-07-2021	-	-
Meg22_1012_Bin_233_Lokiarchaeota	Meg22_1012_Bin_233_scaffold_2698_38_34	dc505f45ae10a55fedbbf6621109884b	674	ProSitePatterns	PS00198	4Fe-4S ferredoxin-type iron-sulfur binding region signature.	600	611	-	T	23-07-2021	IPR017900	4Fe-4S ferredoxin, iron-sulphur binding, conserved site
Meg22_1012_Bin_233_Lokiarchaeota	Meg22_1012_Bin_233_scaffold_2698_38_34	dc505f45ae10a55fedbbf6621109884b	674	ProSiteProfiles	PS51379	4Fe-4S ferredoxin-type iron-sulfur binding domain profile.	592	620	9.693	T	23-07-2021	IPR017896	4Fe-4S ferredoxin-type, iron-sulphur binding domain
Meg22_1012_Bin_233_Lokiarchaeota	Meg22_1012_Bin_233_scaffold_2698_38_34	dc505f45ae10a55fedbbf6621109884b	674	ProSitePatterns	PS00198	4Fe-4S ferredoxin-type iron-sulfur binding region signature.	260	271	-	T	23-07-2021	IPR017900	4Fe-4S ferredoxin, iron-sulphur binding, conserved site
Meg22_1012_Bin_233_Lokiarchaeota	Meg22_1012_Bin_233_scaffold_2698_38_34	dc505f45ae10a55fedbbf6621109884b	674	Gene3D	G3DSA:3.30.70.20	-	574	621	2.7e-05	T	23-07-2021	-	-
Meg22_1012_Bin_233_Lokiarchaeota	Meg22_1012_Bin_233_scaffold_2698_38_34	dc505f45ae10a55fedbbf6621109884b	674	Gene3D	G3DSA:3.40.50.720	-	155	247	5.2e-11	T	23-07-2021	-	-
Meg22_1012_Bin_233_Lokiarchaeota	Meg22_1012_Bin_233_scaffold_2698_38_34	dc505f45ae10a55fedbbf6621109884b	674	ProSiteProfiles	PS51379	4Fe-4S ferredoxin-type iron-sulfur binding domain profile.	622	651	10.39	T	23-07-2021	IPR017896	4Fe-4S ferredoxin-type, iron-sulphur binding domain
Meg22_1012_Bin_233_Lokiarchaeota	Meg22_1012_Bin_233_scaffold_2698_38_34	dc505f45ae10a55fedbbf6621109884b	674	ProSiteProfiles	PS51379	4Fe-4S ferredoxin-type iron-sulfur binding domain profile.	298	329	9.928	T	23-07-2021	IPR017896	4Fe-4S ferredoxin-type, iron-sulphur binding domain
Meg22_1012_Bin_233_Lokiarchaeota	Meg22_1012_Bin_233_scaffold_2698_38_34	dc505f45ae10a55fedbbf6621109884b	674	ProSitePatterns	PS00198	4Fe-4S ferredoxin-type iron-sulfur binding region signature.	631	642	-	T	23-07-2021	IPR017900	4Fe-4S ferredoxin, iron-sulphur binding, conserved site
Meg22_1012_Bin_233_Lokiarchaeota	Meg22_1012_Bin_233_scaffold_2698_38_34	dc505f45ae10a55fedbbf6621109884b	674	PANTHER	PTHR43498	FERREDOXIN:COB-COM HETERODISULFIDE REDUCTASE SUBUNIT A	149	579	5.7e-42	T	23-07-2021	IPR039650	H(2):CoB-CoM heterodisulfide,ferredoxin reductase subunit A-like
Meg22_1012_Bin_233_Lokiarchaeota	Meg22_1012_Bin_233_scaffold_2698_38_34	dc505f45ae10a55fedbbf6621109884b	674	ProSiteProfiles	PS51379	4Fe-4S ferredoxin-type iron-sulfur binding domain profile.	251	281	10.289	T	23-07-2021	IPR017896	4Fe-4S ferredoxin-type, iron-sulphur binding domain
Meg22_1012_Bin_233_Lokiarchaeota	Meg22_1012_Bin_233_scaffold_2698_38_34	dc505f45ae10a55fedbbf6621109884b	674	Pfam	PF07992	Pyridine nucleotide-disulphide oxidoreductase	160	573	4.4e-17	T	23-07-2021	IPR023753	FAD/NAD(P)-binding domain
Meg22_1012_Bin_233_Lokiarchaeota	Meg22_1012_Bin_233_scaffold_2698_38_34	dc505f45ae10a55fedbbf6621109884b	674	Pfam	PF00037	4Fe-4S binding domain	254	272	2.7e-06	T	23-07-2021	IPR017896	4Fe-4S ferredoxin-type, iron-sulphur binding domain
Meg22_1012_Bin_233_Lokiarchaeota	Meg22_1012_Bin_233_scaffold_2698_38_34	dc505f45ae10a55fedbbf6621109884b	674	Gene3D	G3DSA:3.30.70.20	-	282	340	1.4e-05	T	23-07-2021	-	-
Meg22_1012_Bin_233_Lokiarchaeota	Meg22_1012_Bin_233_scaffold_2698_38_34	dc505f45ae10a55fedbbf6621109884b	674	Gene3D	G3DSA:3.30.70.20	-	622	651	6.5e-06	T	23-07-2021	-	-
Meg22_1012_Bin_233_Lokiarchaeota	Meg22_1012_Bin_233_scaffold_2698_38_34	dc505f45ae10a55fedbbf6621109884b	674	Gene3D	G3DSA:3.30.70.20	-	248	275	1.7e-05	T	23-07-2021	-	-
Meg22_1214_Bin_191_Lokiarchaeota	Meg22_1214_Bin_191_scaffold_3091_35_14	dc505f45ae10a55fedbbf6621109884b	674	SUPERFAMILY	SSF51905	FAD/NAD(P)-binding domain	160	579	4.66e-27	T	23-07-2021	IPR036188	FAD/NAD(P)-binding domain superfamily
Meg22_1214_Bin_191_Lokiarchaeota	Meg22_1214_Bin_191_scaffold_3091_35_14	dc505f45ae10a55fedbbf6621109884b	674	Pfam	PF13187	4Fe-4S dicluster domain	600	646	1.6e-09	T	23-07-2021	IPR017896	4Fe-4S ferredoxin-type, iron-sulphur binding domain
Meg22_1214_Bin_191_Lokiarchaeota	Meg22_1214_Bin_191_scaffold_3091_35_14	dc505f45ae10a55fedbbf6621109884b	674	SUPERFAMILY	SSF54862	4Fe-4S ferredoxins	589	650	8.7e-18	T	23-07-2021	-	-
Meg22_1214_Bin_191_Lokiarchaeota	Meg22_1214_Bin_191_scaffold_3091_35_14	dc505f45ae10a55fedbbf6621109884b	674	ProSitePatterns	PS00198	4Fe-4S ferredoxin-type iron-sulfur binding region signature.	600	611	-	T	23-07-2021	IPR017900	4Fe-4S ferredoxin, iron-sulphur binding, conserved site
Meg22_1214_Bin_191_Lokiarchaeota	Meg22_1214_Bin_191_scaffold_3091_35_14	dc505f45ae10a55fedbbf6621109884b	674	ProSiteProfiles	PS51379	4Fe-4S ferredoxin-type iron-sulfur binding domain profile.	592	620	9.693	T	23-07-2021	IPR017896	4Fe-4S ferredoxin-type, iron-sulphur binding domain
Meg22_1214_Bin_191_Lokiarchaeota	Meg22_1214_Bin_191_scaffold_3091_35_14	dc505f45ae10a55fedbbf6621109884b	674	ProSitePatterns	PS00198	4Fe-4S ferredoxin-type iron-sulfur binding region signature.	260	271	-	T	23-07-2021	IPR017900	4Fe-4S ferredoxin, iron-sulphur binding, conserved site
Meg22_1214_Bin_191_Lokiarchaeota	Meg22_1214_Bin_191_scaffold_3091_35_14	dc505f45ae10a55fedbbf6621109884b	674	Gene3D	G3DSA:3.30.70.20	-	574	621	2.7e-05	T	23-07-2021	-	-
Meg22_1214_Bin_191_Lokiarchaeota	Meg22_1214_Bin_191_scaffold_3091_35_14	dc505f45ae10a55fedbbf6621109884b	674	Gene3D	G3DSA:3.40.50.720	-	155	247	5.2e-11	T	23-07-2021	-	-
Meg22_1214_Bin_191_Lokiarchaeota	Meg22_1214_Bin_191_scaffold_3091_35_14	dc505f45ae10a55fedbbf6621109884b	674	ProSiteProfiles	PS51379	4Fe-4S ferredoxin-type iron-sulfur binding domain profile.	622	651	10.39	T	23-07-2021	IPR017896	4Fe-4S ferredoxin-type, iron-sulphur binding domain
Meg22_1214_Bin_191_Lokiarchaeota	Meg22_1214_Bin_191_scaffold_3091_35_14	dc505f45ae10a55fedbbf6621109884b	674	ProSiteProfiles	PS51379	4Fe-4S ferredoxin-type iron-sulfur binding domain profile.	298	329	9.928	T	23-07-2021	IPR017896	4Fe-4S ferredoxin-type, iron-sulphur binding domain
Meg22_1214_Bin_191_Lokiarchaeota	Meg22_1214_Bin_191_scaffold_3091_35_14	dc505f45ae10a55fedbbf6621109884b	674	ProSitePatterns	PS00198	4Fe-4S ferredoxin-type iron-sulfur binding region signature.	631	642	-	T	23-07-2021	IPR017900	4Fe-4S ferredoxin, iron-sulphur binding, conserved site
Meg22_1214_Bin_191_Lokiarchaeota	Meg22_1214_Bin_191_scaffold_3091_35_14	dc505f45ae10a55fedbbf6621109884b	674	PANTHER	PTHR43498	FERREDOXIN:COB-COM HETERODISULFIDE REDUCTASE SUBUNIT A	149	579	5.7e-42	T	23-07-2021	IPR039650	H(2):CoB-CoM heterodisulfide,ferredoxin reductase subunit A-like
Meg22_1214_Bin_191_Lokiarchaeota	Meg22_1214_Bin_191_scaffold_3091_35_14	dc505f45ae10a55fedbbf6621109884b	674	ProSiteProfiles	PS51379	4Fe-4S ferredoxin-type iron-sulfur binding domain profile.	251	281	10.289	T	23-07-2021	IPR017896	4Fe-4S ferredoxin-type, iron-sulphur binding domain
Meg22_1214_Bin_191_Lokiarchaeota	Meg22_1214_Bin_191_scaffold_3091_35_14	dc505f45ae10a55fedbbf6621109884b	674	Pfam	PF07992	Pyridine nucleotide-disulphide oxidoreductase	160	573	4.4e-17	T	23-07-2021	IPR023753	FAD/NAD(P)-binding domain
Meg22_1214_Bin_191_Lokiarchaeota	Meg22_1214_Bin_191_scaffold_3091_35_14	dc505f45ae10a55fedbbf6621109884b	674	Pfam	PF00037	4Fe-4S binding domain	254	272	2.7e-06	T	23-07-2021	IPR017896	4Fe-4S ferredoxin-type, iron-sulphur binding domain
Meg22_1214_Bin_191_Lokiarchaeota	Meg22_1214_Bin_191_scaffold_3091_35_14	dc505f45ae10a55fedbbf6621109884b	674	Gene3D	G3DSA:3.30.70.20	-	282	340	1.4e-05	T	23-07-2021	-	-
Meg22_1214_Bin_191_Lokiarchaeota	Meg22_1214_Bin_191_scaffold_3091_35_14	dc505f45ae10a55fedbbf6621109884b	674	Gene3D	G3DSA:3.30.70.20	-	622	651	6.5e-06	T	23-07-2021	-	-
Meg22_1214_Bin_191_Lokiarchaeota	Meg22_1214_Bin_191_scaffold_3091_35_14	dc505f45ae10a55fedbbf6621109884b	674	Gene3D	G3DSA:3.30.70.20	-	248	275	1.7e-05	T	23-07-2021	-	-
Meg22_1214_Bin_191_Lokiarchaeota	Meg22_1214_Bin_191_scaffold_107_1_107	9990d413b989110c9585e3a2e4bbc8f1	290	TIGRFAM	TIGR00768	rimK_fam: alpha-L-glutamate ligase, RimK family	2	285	8.3e-71	T	23-07-2021	IPR004666	Ribosomal S6 modification enzyme RimK/Lysine biosynthesis enzyme LysX
Meg22_1214_Bin_191_Lokiarchaeota	Meg22_1214_Bin_191_scaffold_107_1_107	9990d413b989110c9585e3a2e4bbc8f1	290	PANTHER	PTHR21621:SF2	COENZYME GAMMA-F420-2:ALPHA-L-GLUTAMATE LIGASE	1	285	7.4e-62	T	23-07-2021	-	-
Meg22_1214_Bin_191_Lokiarchaeota	Meg22_1214_Bin_191_scaffold_107_1_107	9990d413b989110c9585e3a2e4bbc8f1	290	ProSiteProfiles	PS50975	ATP-grasp fold profile.	94	286	31.003	T	23-07-2021	IPR011761	ATP-grasp fold
Meg22_1214_Bin_191_Lokiarchaeota	Meg22_1214_Bin_191_scaffold_107_1_107	9990d413b989110c9585e3a2e4bbc8f1	290	SUPERFAMILY	SSF56059	Glutathione synthetase ATP-binding domain-like	88	287	1.69e-41	T	23-07-2021	-	-
Meg22_1214_Bin_191_Lokiarchaeota	Meg22_1214_Bin_191_scaffold_107_1_107	9990d413b989110c9585e3a2e4bbc8f1	290	Gene3D	G3DSA:3.30.1490.20	-	105	174	1.3e-23	T	23-07-2021	IPR013815	ATP-grasp fold, subdomain 1
Meg22_1214_Bin_191_Lokiarchaeota	Meg22_1214_Bin_191_scaffold_107_1_107	9990d413b989110c9585e3a2e4bbc8f1	290	Pfam	PF08443	RimK-like ATP-grasp domain	89	285	3.3e-37	T	23-07-2021	IPR013651	ATP-grasp fold, RimK-type
Meg22_1214_Bin_191_Lokiarchaeota	Meg22_1214_Bin_191_scaffold_107_1_107	9990d413b989110c9585e3a2e4bbc8f1	290	Gene3D	G3DSA:3.30.470.80	-	181	289	1.9e-32	T	23-07-2021	-	-
Meg22_1214_Bin_191_Lokiarchaeota	Meg22_1214_Bin_191_scaffold_107_1_107	9990d413b989110c9585e3a2e4bbc8f1	290	Gene3D	G3DSA:3.40.50.20	-	1	104	1.3e-23	T	23-07-2021	-	-
Meg22_1214_Bin_191_Lokiarchaeota	Meg22_1214_Bin_191_scaffold_107_1_107	9990d413b989110c9585e3a2e4bbc8f1	290	PANTHER	PTHR21621	RIBOSOMAL PROTEIN S6 MODIFICATION PROTEIN	1	285	7.4e-62	T	23-07-2021	-	-
Meg22_1214_Bin_191_Lokiarchaeota	Meg22_1214_Bin_191_scaffold_107_1_107	9990d413b989110c9585e3a2e4bbc8f1	290	SUPERFAMILY	SSF52440	PreATP-grasp domain	2	89	3.74e-13	T	23-07-2021	IPR016185	Pre-ATP-grasp domain superfamily
Meg22_1012_Bin_233_Lokiarchaeota	Meg22_1012_Bin_233_scaffold_21_5_122	9990d413b989110c9585e3a2e4bbc8f1	290	TIGRFAM	TIGR00768	rimK_fam: alpha-L-glutamate ligase, RimK family	2	285	8.3e-71	T	23-07-2021	IPR004666	Ribosomal S6 modification enzyme RimK/Lysine biosynthesis enzyme LysX
Meg22_1012_Bin_233_Lokiarchaeota	Meg22_1012_Bin_233_scaffold_21_5_122	9990d413b989110c9585e3a2e4bbc8f1	290	PANTHER	PTHR21621:SF2	COENZYME GAMMA-F420-2:ALPHA-L-GLUTAMATE LIGASE	1	285	7.4e-62	T	23-07-2021	-	-
Meg22_1012_Bin_233_Lokiarchaeota	Meg22_1012_Bin_233_scaffold_21_5_122	9990d413b989110c9585e3a2e4bbc8f1	290	ProSiteProfiles	PS50975	ATP-grasp fold profile.	94	286	31.003	T	23-07-2021	IPR011761	ATP-grasp fold
Meg22_1012_Bin_233_Lokiarchaeota	Meg22_1012_Bin_233_scaffold_21_5_122	9990d413b989110c9585e3a2e4bbc8f1	290	SUPERFAMILY	SSF56059	Glutathione synthetase ATP-binding domain-like	88	287	1.69e-41	T	23-07-2021	-	-
Meg22_1012_Bin_233_Lokiarchaeota	Meg22_1012_Bin_233_scaffold_21_5_122	9990d413b989110c9585e3a2e4bbc8f1	290	Gene3D	G3DSA:3.30.1490.20	-	105	174	1.3e-23	T	23-07-2021	IPR013815	ATP-grasp fold, subdomain 1
Meg22_1012_Bin_233_Lokiarchaeota	Meg22_1012_Bin_233_scaffold_21_5_122	9990d413b989110c9585e3a2e4bbc8f1	290	Pfam	PF08443	RimK-like ATP-grasp domain	89	285	3.3e-37	T	23-07-2021	IPR013651	ATP-grasp fold, RimK-type
Meg22_1012_Bin_233_Lokiarchaeota	Meg22_1012_Bin_233_scaffold_21_5_122	9990d413b989110c9585e3a2e4bbc8f1	290	Gene3D	G3DSA:3.30.470.80	-	181	289	1.9e-32	T	23-07-2021	-	-
Meg22_1012_Bin_233_Lokiarchaeota	Meg22_1012_Bin_233_scaffold_21_5_122	9990d413b989110c9585e3a2e4bbc8f1	290	Gene3D	G3DSA:3.40.50.20	-	1	104	1.3e-23	T	23-07-2021	-	-
Meg22_1012_Bin_233_Lokiarchaeota	Meg22_1012_Bin_233_scaffold_21_5_122	9990d413b989110c9585e3a2e4bbc8f1	290	PANTHER	PTHR21621	RIBOSOMAL PROTEIN S6 MODIFICATION PROTEIN	1	285	7.4e-62	T	23-07-2021	-	-
Meg22_1012_Bin_233_Lokiarchaeota	Meg22_1012_Bin_233_scaffold_21_5_122	9990d413b989110c9585e3a2e4bbc8f1	290	SUPERFAMILY	SSF52440	PreATP-grasp domain	2	89	3.74e-13	T	23-07-2021	IPR016185	Pre-ATP-grasp domain superfamily
Meg22_1416_Bin_151_Lokiarchaeota	Meg22_1416_Bin_151_scaffold_915_24_3	9990d413b989110c9585e3a2e4bbc8f1	290	TIGRFAM	TIGR00768	rimK_fam: alpha-L-glutamate ligase, RimK family	2	285	8.3e-71	T	23-07-2021	IPR004666	Ribosomal S6 modification enzyme RimK/Lysine biosynthesis enzyme LysX
Meg22_1416_Bin_151_Lokiarchaeota	Meg22_1416_Bin_151_scaffold_915_24_3	9990d413b989110c9585e3a2e4bbc8f1	290	PANTHER	PTHR21621:SF2	COENZYME GAMMA-F420-2:ALPHA-L-GLUTAMATE LIGASE	1	285	7.4e-62	T	23-07-2021	-	-
Meg22_1416_Bin_151_Lokiarchaeota	Meg22_1416_Bin_151_scaffold_915_24_3	9990d413b989110c9585e3a2e4bbc8f1	290	ProSiteProfiles	PS50975	ATP-grasp fold profile.	94	286	31.003	T	23-07-2021	IPR011761	ATP-grasp fold
Meg22_1416_Bin_151_Lokiarchaeota	Meg22_1416_Bin_151_scaffold_915_24_3	9990d413b989110c9585e3a2e4bbc8f1	290	SUPERFAMILY	SSF56059	Glutathione synthetase ATP-binding domain-like	88	287	1.69e-41	T	23-07-2021	-	-
Meg22_1416_Bin_151_Lokiarchaeota	Meg22_1416_Bin_151_scaffold_915_24_3	9990d413b989110c9585e3a2e4bbc8f1	290	Gene3D	G3DSA:3.30.1490.20	-	105	174	1.3e-23	T	23-07-2021	IPR013815	ATP-grasp fold, subdomain 1
Meg22_1416_Bin_151_Lokiarchaeota	Meg22_1416_Bin_151_scaffold_915_24_3	9990d413b989110c9585e3a2e4bbc8f1	290	Pfam	PF08443	RimK-like ATP-grasp domain	89	285	3.3e-37	T	23-07-2021	IPR013651	ATP-grasp fold, RimK-type
Meg22_1416_Bin_151_Lokiarchaeota	Meg22_1416_Bin_151_scaffold_915_24_3	9990d413b989110c9585e3a2e4bbc8f1	290	Gene3D	G3DSA:3.30.470.80	-	181	289	1.9e-32	T	23-07-2021	-	-
Meg22_1416_Bin_151_Lokiarchaeota	Meg22_1416_Bin_151_scaffold_915_24_3	9990d413b989110c9585e3a2e4bbc8f1	290	Gene3D	G3DSA:3.40.50.20	-	1	104	1.3e-23	T	23-07-2021	-	-
Meg22_1416_Bin_151_Lokiarchaeota	Meg22_1416_Bin_151_scaffold_915_24_3	9990d413b989110c9585e3a2e4bbc8f1	290	PANTHER	PTHR21621	RIBOSOMAL PROTEIN S6 MODIFICATION PROTEIN	1	285	7.4e-62	T	23-07-2021	-	-
Meg22_1416_Bin_151_Lokiarchaeota	Meg22_1416_Bin_151_scaffold_915_24_3	9990d413b989110c9585e3a2e4bbc8f1	290	SUPERFAMILY	SSF52440	PreATP-grasp domain	2	89	3.74e-13	T	23-07-2021	IPR016185	Pre-ATP-grasp domain superfamily
Meg22_1416_Bin_151_Lokiarchaeota	Meg22_1416_Bin_151_scaffold_440_15_42	f2cfef8af365d4c7045c2dd56e008e4f	320	PANTHER	PTHR43413	TRANSCRIPTIONAL REGULATOR, ASNC FAMILY	161	313	6.1e-32	T	23-07-2021	-	-
Meg22_1416_Bin_151_Lokiarchaeota	Meg22_1416_Bin_151_scaffold_440_15_42	f2cfef8af365d4c7045c2dd56e008e4f	320	SMART	SM00344	asnc	164	280	1.6e-07	T	23-07-2021	IPR019888	Transcription regulator AsnC-like
Meg22_1416_Bin_151_Lokiarchaeota	Meg22_1416_Bin_151_scaffold_440_15_42	f2cfef8af365d4c7045c2dd56e008e4f	320	SUPERFAMILY	SSF46785	Winged helix DNA-binding domain	165	220	1.77e-06	T	23-07-2021	IPR036390	Winged helix DNA-binding domain superfamily
Meg22_1416_Bin_151_Lokiarchaeota	Meg22_1416_Bin_151_scaffold_440_15_42	f2cfef8af365d4c7045c2dd56e008e4f	320	Gene3D	G3DSA:1.10.10.10	winged helix"" repressor DNA binding domain	11	57	9.5e-06	T	23-07-2021	IPR036388	Winged helix-like DNA-binding domain superfamily
Meg22_1416_Bin_151_Lokiarchaeota	Meg22_1416_Bin_151_scaffold_440_15_42	f2cfef8af365d4c7045c2dd56e008e4f	320	PANTHER	PTHR43413:SF3	REGULATORY PROTEIN ASNC	11	127	6.1e-32	T	23-07-2021	-	-
Meg22_1416_Bin_151_Lokiarchaeota	Meg22_1416_Bin_151_scaffold_440_15_42	f2cfef8af365d4c7045c2dd56e008e4f	320	PANTHER	PTHR43413	TRANSCRIPTIONAL REGULATOR, ASNC FAMILY	11	127	6.1e-32	T	23-07-2021	-	-
Meg22_1416_Bin_151_Lokiarchaeota	Meg22_1416_Bin_151_scaffold_440_15_42	f2cfef8af365d4c7045c2dd56e008e4f	320	Pfam	PF01037	Lrp/AsnC ligand binding domain	239	309	9.3e-07	T	23-07-2021	IPR019887	Transcription regulator AsnC/Lrp, ligand binding domain
Meg22_1416_Bin_151_Lokiarchaeota	Meg22_1416_Bin_151_scaffold_440_15_42	f2cfef8af365d4c7045c2dd56e008e4f	320	PANTHER	PTHR43413:SF3	REGULATORY PROTEIN ASNC	161	313	6.1e-32	T	23-07-2021	-	-
Meg22_1416_Bin_151_Lokiarchaeota	Meg22_1416_Bin_151_scaffold_440_15_42	f2cfef8af365d4c7045c2dd56e008e4f	320	Gene3D	G3DSA:3.30.70.920	-	226	315	2.7e-09	T	23-07-2021	-	-
Meg22_1416_Bin_151_Lokiarchaeota	Meg22_1416_Bin_151_scaffold_440_15_42	f2cfef8af365d4c7045c2dd56e008e4f	320	Pfam	PF01475	Ferric uptake regulator family	169	227	1.4e-05	T	23-07-2021	IPR002481	Ferric-uptake regulator
Meg22_1416_Bin_151_Lokiarchaeota	Meg22_1416_Bin_151_scaffold_440_15_42	f2cfef8af365d4c7045c2dd56e008e4f	320	Gene3D	G3DSA:1.10.10.10	winged helix"" repressor DNA binding domain	164	221	3.4e-07	T	23-07-2021	IPR036388	Winged helix-like DNA-binding domain superfamily
Meg22_1416_Bin_151_Lokiarchaeota	Meg22_1416_Bin_151_scaffold_440_15_42	f2cfef8af365d4c7045c2dd56e008e4f	320	SUPERFAMILY	SSF54909	Dimeric alpha+beta barrel	238	313	7.64e-07	T	23-07-2021	IPR011008	Dimeric alpha-beta barrel
Meg19_1012_Bin_504_Helarchaeota	Meg19_1012_Bin_504_scaffold_4800_47_23	a5fa1ca538d8c1b6ccd57039da606c3e	401	PANTHER	PTHR43000	DTDP-D-GLUCOSE 4,6-DEHYDRATASE-RELATED	12	389	1.4e-32	T	23-07-2021	-	-
Meg19_1012_Bin_504_Helarchaeota	Meg19_1012_Bin_504_scaffold_4800_47_23	a5fa1ca538d8c1b6ccd57039da606c3e	401	Pfam	PF01370	NAD dependent epimerase/dehydratase family	194	281	1.5e-05	T	23-07-2021	IPR001509	NAD-dependent epimerase/dehydratase
Meg19_1012_Bin_504_Helarchaeota	Meg19_1012_Bin_504_scaffold_4800_47_23	a5fa1ca538d8c1b6ccd57039da606c3e	401	SUPERFAMILY	SSF51735	NAD(P)-binding Rossmann-fold domains	7	391	4.2e-50	T	23-07-2021	IPR036291	NAD(P)-binding domain superfamily
Meg19_1012_Bin_504_Helarchaeota	Meg19_1012_Bin_504_scaffold_4800_47_23	a5fa1ca538d8c1b6ccd57039da606c3e	401	Gene3D	G3DSA:3.40.50.720	-	166	394	1.7e-37	T	23-07-2021	-	-
Meg19_1012_Bin_504_Helarchaeota	Meg19_1012_Bin_504_scaffold_4800_47_23	a5fa1ca538d8c1b6ccd57039da606c3e	401	Gene3D	G3DSA:3.40.50.720	-	2	160	2.6e-34	T	23-07-2021	-	-
Meg19_1012_Bin_504_Helarchaeota	Meg19_1012_Bin_504_scaffold_4800_47_23	a5fa1ca538d8c1b6ccd57039da606c3e	401	PANTHER	PTHR43000:SF27	DTDP-GLUCOSE 4,6-DEHYDRATASE 2	12	389	1.4e-32	T	23-07-2021	-	-
Meg19_1012_Bin_504_Helarchaeota	Meg19_1012_Bin_504_scaffold_4800_47_23	a5fa1ca538d8c1b6ccd57039da606c3e	401	Pfam	PF01073	3-beta hydroxysteroid dehydrogenase/isomerase family	14	131	4.6e-21	T	23-07-2021	IPR002225	3-beta hydroxysteroid dehydrogenase/isomerase
Meg19_1012_Bin_504_Helarchaeota	Meg19_1012_Bin_504_scaffold_3019_37_26	3dfe4d7948b64fc33655d07526206c16	435	SUPERFAMILY	SSF103473	MFS general substrate transporter	22	428	2.49e-07	T	23-07-2021	IPR036259	MFS transporter superfamily
Meg22_1012_Bin_233_Lokiarchaeota	Meg22_1012_Bin_233_scaffold_193_17_94	beda04dcd770b9fcd9d53adcd1f5f14d	128	SUPERFAMILY	SSF50692	ADC-like	4	116	3.11e-15	T	23-07-2021	IPR009010	Aspartate decarboxylase-like domain superfamily
Meg22_1012_Bin_233_Lokiarchaeota	Meg22_1012_Bin_233_scaffold_193_17_94	beda04dcd770b9fcd9d53adcd1f5f14d	128	Gene3D	G3DSA:2.40.40.20	-	1	125	5.7e-28	T	23-07-2021	-	-
Meg22_1012_Bin_233_Lokiarchaeota	Meg22_1012_Bin_233_scaffold_193_17_94	beda04dcd770b9fcd9d53adcd1f5f14d	128	Pfam	PF01568	Molydopterin dinucleotide binding domain	5	88	1.9e-11	T	23-07-2021	IPR006657	Molybdopterin dinucleotide-binding domain
Meg22_1214_Bin_191_Lokiarchaeota	Meg22_1214_Bin_191_scaffold_941_13_42	489be10563df7c41309db9a65e9a6a57	115	Pfam	PF03259	Roadblock/LC7 domain	10	92	1.8e-06	T	23-07-2021	IPR004942	Roadblock/LAMTOR2 domain
Meg22_1214_Bin_191_Lokiarchaeota	Meg22_1214_Bin_191_scaffold_941_13_42	489be10563df7c41309db9a65e9a6a57	115	Gene3D	G3DSA:3.30.450.30	Dynein light chain 2a	3	115	7.9e-08	T	23-07-2021	-	-
Meg22_1214_Bin_191_Lokiarchaeota	Meg22_1214_Bin_191_scaffold_941_13_42	489be10563df7c41309db9a65e9a6a57	115	SUPERFAMILY	SSF103196	Roadblock/LC7 domain	3	92	2.27e-07	T	23-07-2021	-	-
Meg22_1214_Bin_191_Lokiarchaeota	Meg22_1214_Bin_191_scaffold_941_13_42	489be10563df7c41309db9a65e9a6a57	115	Coils	Coil	Coil	107	115	-	T	23-07-2021	-	-
Meg22_1012_Bin_233_Lokiarchaeota	Meg22_1012_Bin_233_scaffold_193_17_32	489be10563df7c41309db9a65e9a6a57	115	Pfam	PF03259	Roadblock/LC7 domain	10	92	1.8e-06	T	23-07-2021	IPR004942	Roadblock/LAMTOR2 domain
Meg22_1012_Bin_233_Lokiarchaeota	Meg22_1012_Bin_233_scaffold_193_17_32	489be10563df7c41309db9a65e9a6a57	115	Gene3D	G3DSA:3.30.450.30	Dynein light chain 2a	3	115	7.9e-08	T	23-07-2021	-	-
Meg22_1012_Bin_233_Lokiarchaeota	Meg22_1012_Bin_233_scaffold_193_17_32	489be10563df7c41309db9a65e9a6a57	115	SUPERFAMILY	SSF103196	Roadblock/LC7 domain	3	92	2.27e-07	T	23-07-2021	-	-
Meg22_1012_Bin_233_Lokiarchaeota	Meg22_1012_Bin_233_scaffold_193_17_32	489be10563df7c41309db9a65e9a6a57	115	Coils	Coil	Coil	107	115	-	T	23-07-2021	-	-
Meg22_1416_Bin_151_Lokiarchaeota	Meg22_1416_Bin_151_scaffold_829_23_17	489be10563df7c41309db9a65e9a6a57	115	Pfam	PF03259	Roadblock/LC7 domain	10	92	1.8e-06	T	23-07-2021	IPR004942	Roadblock/LAMTOR2 domain
Meg22_1416_Bin_151_Lokiarchaeota	Meg22_1416_Bin_151_scaffold_829_23_17	489be10563df7c41309db9a65e9a6a57	115	Gene3D	G3DSA:3.30.450.30	Dynein light chain 2a	3	115	7.9e-08	T	23-07-2021	-	-
Meg22_1416_Bin_151_Lokiarchaeota	Meg22_1416_Bin_151_scaffold_829_23_17	489be10563df7c41309db9a65e9a6a57	115	SUPERFAMILY	SSF103196	Roadblock/LC7 domain	3	92	2.27e-07	T	23-07-2021	-	-
Meg22_1416_Bin_151_Lokiarchaeota	Meg22_1416_Bin_151_scaffold_829_23_17	489be10563df7c41309db9a65e9a6a57	115	Coils	Coil	Coil	107	115	-	T	23-07-2021	-	-
Meg22_1214_Bin_191_Lokiarchaeota	Meg22_1214_Bin_191_scaffold_387_6_81	144010c2bb0d62c3639faac2da5b5d35	194	PANTHER	PTHR15910	ARCHAEMETZINCIN	2	189	3.7e-32	T	23-07-2021	IPR012962	Peptidase M54, archaemetzincin
Meg22_1214_Bin_191_Lokiarchaeota	Meg22_1214_Bin_191_scaffold_387_6_81	144010c2bb0d62c3639faac2da5b5d35	194	PIRSF	PIRSF005785	Zn-prot_arch	1	193	1.6e-48	T	23-07-2021	IPR012091	Peptidase M54, archaemetzincin, archaeal/bacterial
Meg22_1214_Bin_191_Lokiarchaeota	Meg22_1214_Bin_191_scaffold_387_6_81	144010c2bb0d62c3639faac2da5b5d35	194	Pfam	PF07998	Peptidase family M54	40	184	4.8e-28	T	23-07-2021	IPR012962	Peptidase M54, archaemetzincin
Meg22_1214_Bin_191_Lokiarchaeota	Meg22_1214_Bin_191_scaffold_387_6_81	144010c2bb0d62c3639faac2da5b5d35	194	SUPERFAMILY	SSF55486	Metalloproteases ("zincins"), catalytic domain	47	165	4.3e-09	T	23-07-2021	-	-
Meg22_1214_Bin_191_Lokiarchaeota	Meg22_1214_Bin_191_scaffold_387_6_81	144010c2bb0d62c3639faac2da5b5d35	194	CDD	cd11375	Peptidase_M54	4	185	2.87682e-57	T	23-07-2021	IPR012962	Peptidase M54, archaemetzincin
Meg22_1214_Bin_191_Lokiarchaeota	Meg22_1214_Bin_191_scaffold_387_6_81	144010c2bb0d62c3639faac2da5b5d35	194	Gene3D	G3DSA:3.40.390.10	Collagenase (Catalytic Domain)	9	189	1.5e-49	T	23-07-2021	IPR024079	Metallopeptidase, catalytic domain superfamily
Meg22_1416_Bin_151_Lokiarchaeota	Meg22_1416_Bin_151_scaffold_488_16_10	144010c2bb0d62c3639faac2da5b5d35	194	PANTHER	PTHR15910	ARCHAEMETZINCIN	2	189	3.7e-32	T	23-07-2021	IPR012962	Peptidase M54, archaemetzincin
Meg22_1416_Bin_151_Lokiarchaeota	Meg22_1416_Bin_151_scaffold_488_16_10	144010c2bb0d62c3639faac2da5b5d35	194	PIRSF	PIRSF005785	Zn-prot_arch	1	193	1.6e-48	T	23-07-2021	IPR012091	Peptidase M54, archaemetzincin, archaeal/bacterial
Meg22_1416_Bin_151_Lokiarchaeota	Meg22_1416_Bin_151_scaffold_488_16_10	144010c2bb0d62c3639faac2da5b5d35	194	Pfam	PF07998	Peptidase family M54	40	184	4.8e-28	T	23-07-2021	IPR012962	Peptidase M54, archaemetzincin
Meg22_1416_Bin_151_Lokiarchaeota	Meg22_1416_Bin_151_scaffold_488_16_10	144010c2bb0d62c3639faac2da5b5d35	194	SUPERFAMILY	SSF55486	Metalloproteases ("zincins"), catalytic domain	47	165	4.3e-09	T	23-07-2021	-	-
Meg22_1416_Bin_151_Lokiarchaeota	Meg22_1416_Bin_151_scaffold_488_16_10	144010c2bb0d62c3639faac2da5b5d35	194	CDD	cd11375	Peptidase_M54	4	185	2.87682e-57	T	23-07-2021	IPR012962	Peptidase M54, archaemetzincin
Meg22_1416_Bin_151_Lokiarchaeota	Meg22_1416_Bin_151_scaffold_488_16_10	144010c2bb0d62c3639faac2da5b5d35	194	Gene3D	G3DSA:3.40.390.10	Collagenase (Catalytic Domain)	9	189	1.5e-49	T	23-07-2021	IPR024079	Metallopeptidase, catalytic domain superfamily
Meg22_1012_Bin_233_Lokiarchaeota	Meg22_1012_Bin_233_scaffold_166_13_81	144010c2bb0d62c3639faac2da5b5d35	194	PANTHER	PTHR15910	ARCHAEMETZINCIN	2	189	3.7e-32	T	23-07-2021	IPR012962	Peptidase M54, archaemetzincin
Meg22_1012_Bin_233_Lokiarchaeota	Meg22_1012_Bin_233_scaffold_166_13_81	144010c2bb0d62c3639faac2da5b5d35	194	PIRSF	PIRSF005785	Zn-prot_arch	1	193	1.6e-48	T	23-07-2021	IPR012091	Peptidase M54, archaemetzincin, archaeal/bacterial
Meg22_1012_Bin_233_Lokiarchaeota	Meg22_1012_Bin_233_scaffold_166_13_81	144010c2bb0d62c3639faac2da5b5d35	194	Pfam	PF07998	Peptidase family M54	40	184	4.8e-28	T	23-07-2021	IPR012962	Peptidase M54, archaemetzincin
Meg22_1012_Bin_233_Lokiarchaeota	Meg22_1012_Bin_233_scaffold_166_13_81	144010c2bb0d62c3639faac2da5b5d35	194	SUPERFAMILY	SSF55486	Metalloproteases ("zincins"), catalytic domain	47	165	4.3e-09	T	23-07-2021	-	-
Meg22_1012_Bin_233_Lokiarchaeota	Meg22_1012_Bin_233_scaffold_166_13_81	144010c2bb0d62c3639faac2da5b5d35	194	CDD	cd11375	Peptidase_M54	4	185	2.87682e-57	T	23-07-2021	IPR012962	Peptidase M54, archaemetzincin
Meg22_1012_Bin_233_Lokiarchaeota	Meg22_1012_Bin_233_scaffold_166_13_81	144010c2bb0d62c3639faac2da5b5d35	194	Gene3D	G3DSA:3.40.390.10	Collagenase (Catalytic Domain)	9	189	1.5e-49	T	23-07-2021	IPR024079	Metallopeptidase, catalytic domain superfamily
Meg19_1012_Bin_504_Helarchaeota	Meg19_1012_Bin_504_scaffold_367_1_14	e28c6f8eb9dad85adc193be07da084f5	141	Pfam	PF03551	Transcriptional regulator PadR-like family	4	60	1.8e-08	T	23-07-2021	IPR005149	Transcription regulator PadR, N-terminal
Meg19_1012_Bin_504_Helarchaeota	Meg19_1012_Bin_504_scaffold_367_1_14	e28c6f8eb9dad85adc193be07da084f5	141	SUPERFAMILY	SSF46785	Winged helix DNA-binding domain	3	127	4.23e-13	T	23-07-2021	IPR036390	Winged helix DNA-binding domain superfamily
Meg19_1012_Bin_504_Helarchaeota	Meg19_1012_Bin_504_scaffold_367_1_14	e28c6f8eb9dad85adc193be07da084f5	141	Gene3D	G3DSA:1.10.10.10	winged helix"" repressor DNA binding domain	1	66	8.4e-12	T	23-07-2021	IPR036388	Winged helix-like DNA-binding domain superfamily
Meg19_1012_Bin_504_Helarchaeota	Meg19_1012_Bin_504_scaffold_367_1_14	e28c6f8eb9dad85adc193be07da084f5	141	Coils	Coil	Coil	108	135	-	T	23-07-2021	-	-
Meg22_1214_Bin_191_Lokiarchaeota	Meg22_1214_Bin_191_scaffold_6474_49_20	c13a3fb1da22ff1da1d8ff434ed4fe93	180	Gene3D	G3DSA:3.40.50.360	-	1	169	1.8e-35	T	23-07-2021	IPR029039	Flavoprotein-like superfamily
Meg22_1214_Bin_191_Lokiarchaeota	Meg22_1214_Bin_191_scaffold_6474_49_20	c13a3fb1da22ff1da1d8ff434ed4fe93	180	Pfam	PF03358	NADPH-dependent FMN reductase	1	141	2.2e-20	T	23-07-2021	IPR005025	NADPH-dependent FMN reductase-like
Meg22_1214_Bin_191_Lokiarchaeota	Meg22_1214_Bin_191_scaffold_6474_49_20	c13a3fb1da22ff1da1d8ff434ed4fe93	180	PANTHER	PTHR43278	NAD(P)H-DEPENDENT FMN-CONTAINING OXIDOREDUCTASE YWQN-RELATED	1	178	2.4e-29	T	23-07-2021	-	-
Meg22_1214_Bin_191_Lokiarchaeota	Meg22_1214_Bin_191_scaffold_6474_49_20	c13a3fb1da22ff1da1d8ff434ed4fe93	180	SUPERFAMILY	SSF52218	Flavoproteins	1	176	1.82e-33	T	23-07-2021	IPR029039	Flavoprotein-like superfamily
Meg22_1012_Bin_233_Lokiarchaeota	Meg22_1012_Bin_233_scaffold_939_24_57	c13a3fb1da22ff1da1d8ff434ed4fe93	180	Gene3D	G3DSA:3.40.50.360	-	1	169	1.8e-35	T	23-07-2021	IPR029039	Flavoprotein-like superfamily
Meg22_1012_Bin_233_Lokiarchaeota	Meg22_1012_Bin_233_scaffold_939_24_57	c13a3fb1da22ff1da1d8ff434ed4fe93	180	Pfam	PF03358	NADPH-dependent FMN reductase	1	141	2.2e-20	T	23-07-2021	IPR005025	NADPH-dependent FMN reductase-like
Meg22_1012_Bin_233_Lokiarchaeota	Meg22_1012_Bin_233_scaffold_939_24_57	c13a3fb1da22ff1da1d8ff434ed4fe93	180	PANTHER	PTHR43278	NAD(P)H-DEPENDENT FMN-CONTAINING OXIDOREDUCTASE YWQN-RELATED	1	178	2.4e-29	T	23-07-2021	-	-
Meg22_1012_Bin_233_Lokiarchaeota	Meg22_1012_Bin_233_scaffold_939_24_57	c13a3fb1da22ff1da1d8ff434ed4fe93	180	SUPERFAMILY	SSF52218	Flavoproteins	1	176	1.82e-33	T	23-07-2021	IPR029039	Flavoprotein-like superfamily
Meg19_1012_Bin_504_Helarchaeota	Meg19_1012_Bin_504_scaffold_2514_32_18	cdfac1851f3c3b4caf3a8a52cf55497a	169	Gene3D	G3DSA:3.40.50.1450	-	22	168	9.1e-33	T	23-07-2021	IPR023430	Peptidase HybD-like domain superfamily
Meg19_1012_Bin_504_Helarchaeota	Meg19_1012_Bin_504_scaffold_2514_32_18	cdfac1851f3c3b4caf3a8a52cf55497a	169	PRINTS	PR00446	Hydrogen uptake protein signature	78	88	2.9e-06	T	23-07-2021	IPR000671	Peptidase A31 family
Meg19_1012_Bin_504_Helarchaeota	Meg19_1012_Bin_504_scaffold_2514_32_18	cdfac1851f3c3b4caf3a8a52cf55497a	169	PRINTS	PR00446	Hydrogen uptake protein signature	37	48	2.9e-06	T	23-07-2021	IPR000671	Peptidase A31 family
Meg19_1012_Bin_504_Helarchaeota	Meg19_1012_Bin_504_scaffold_2514_32_18	cdfac1851f3c3b4caf3a8a52cf55497a	169	PRINTS	PR00446	Hydrogen uptake protein signature	89	105	2.9e-06	T	23-07-2021	IPR000671	Peptidase A31 family
Meg19_1012_Bin_504_Helarchaeota	Meg19_1012_Bin_504_scaffold_2514_32_18	cdfac1851f3c3b4caf3a8a52cf55497a	169	PRINTS	PR00446	Hydrogen uptake protein signature	25	37	2.9e-06	T	23-07-2021	IPR000671	Peptidase A31 family
Meg19_1012_Bin_504_Helarchaeota	Meg19_1012_Bin_504_scaffold_2514_32_18	cdfac1851f3c3b4caf3a8a52cf55497a	169	SUPERFAMILY	SSF53163	HybD-like	24	167	1.57e-23	T	23-07-2021	IPR023430	Peptidase HybD-like domain superfamily
Meg19_1012_Bin_504_Helarchaeota	Meg19_1012_Bin_504_scaffold_2514_32_18	cdfac1851f3c3b4caf3a8a52cf55497a	169	TIGRFAM	TIGR00072	hydrog_prot: hydrogenase maturation protease	27	159	1.6e-23	T	23-07-2021	IPR000671	Peptidase A31 family
Meg19_1012_Bin_504_Helarchaeota	Meg19_1012_Bin_504_scaffold_2514_32_18	cdfac1851f3c3b4caf3a8a52cf55497a	169	PANTHER	PTHR30302	HYDROGENASE 1 MATURATION PROTEASE	24	166	3.2e-22	T	23-07-2021	IPR000671	Peptidase A31 family
Meg19_1012_Bin_504_Helarchaeota	Meg19_1012_Bin_504_scaffold_2514_32_18	cdfac1851f3c3b4caf3a8a52cf55497a	169	Pfam	PF01750	Hydrogenase maturation protease	43	160	1.4e-09	T	23-07-2021	IPR000671	Peptidase A31 family
Meg22_1214_Bin_191_Lokiarchaeota	Meg22_1214_Bin_191_scaffold_178258_209_3	752ef1383201ef48a34d52ca69d43785	318	Coils	Coil	Coil	47	67	-	T	23-07-2021	-	-
Meg19_1012_Bin_504_Helarchaeota	Meg19_1012_Bin_504_scaffold_18497_89_13	fa08b6d87d3e8145656d0edc5723d012	447	PIRSF	PIRSF037016	Pseudouridin_synth_euk	3	67	0.036	T	23-07-2021	IPR001656	Pseudouridine synthase, TruD
Meg19_1012_Bin_504_Helarchaeota	Meg19_1012_Bin_504_scaffold_18497_89_13	fa08b6d87d3e8145656d0edc5723d012	447	PIRSF	PIRSF037016	Pseudouridin_synth_euk	57	419	6.5e-55	T	23-07-2021	IPR001656	Pseudouridine synthase, TruD
Meg19_1012_Bin_504_Helarchaeota	Meg19_1012_Bin_504_scaffold_18497_89_13	fa08b6d87d3e8145656d0edc5723d012	447	PIRSF	PIRSF037016	Pseudouridin_synth_euk	333	447	0.0035	T	23-07-2021	IPR001656	Pseudouridine synthase, TruD
Meg19_1012_Bin_504_Helarchaeota	Meg19_1012_Bin_504_scaffold_18497_89_13	fa08b6d87d3e8145656d0edc5723d012	447	ProSitePatterns	PS01268	Uncharacterized protein family UPF0024 signature.	100	113	-	T	23-07-2021	IPR020119	Pseudouridine synthase TruD, conserved site
Meg19_1012_Bin_504_Helarchaeota	Meg19_1012_Bin_504_scaffold_18497_89_13	fa08b6d87d3e8145656d0edc5723d012	447	PANTHER	PTHR13326	TRNA PSEUDOURIDINE SYNTHASE D	8	46	2.8e-70	T	23-07-2021	IPR001656	Pseudouridine synthase, TruD
Meg19_1012_Bin_504_Helarchaeota	Meg19_1012_Bin_504_scaffold_18497_89_13	fa08b6d87d3e8145656d0edc5723d012	447	SUPERFAMILY	SSF55120	Pseudouridine synthase	11	446	9.64e-66	T	23-07-2021	IPR020103	Pseudouridine synthase, catalytic domain superfamily
Meg19_1012_Bin_504_Helarchaeota	Meg19_1012_Bin_504_scaffold_18497_89_13	fa08b6d87d3e8145656d0edc5723d012	447	ProSiteProfiles	PS50984	TRUD domain profile.	183	404	30.285	T	23-07-2021	IPR011760	Pseudouridine synthase, TruD, insertion domain
Meg19_1012_Bin_504_Helarchaeota	Meg19_1012_Bin_504_scaffold_18497_89_13	fa08b6d87d3e8145656d0edc5723d012	447	PANTHER	PTHR13326	TRNA PSEUDOURIDINE SYNTHASE D	69	446	2.8e-70	T	23-07-2021	IPR001656	Pseudouridine synthase, TruD
Meg19_1012_Bin_504_Helarchaeota	Meg19_1012_Bin_504_scaffold_18497_89_13	fa08b6d87d3e8145656d0edc5723d012	447	PANTHER	PTHR13326:SF21	PSEUDOURIDYLATE SYNTHASE 7 HOMOLOG	8	46	2.8e-70	T	23-07-2021	-	-
Meg19_1012_Bin_504_Helarchaeota	Meg19_1012_Bin_504_scaffold_18497_89_13	fa08b6d87d3e8145656d0edc5723d012	447	Gene3D	G3DSA:3.30.70.3160	-	67	147	8.2e-104	T	23-07-2021	-	-
Meg19_1012_Bin_504_Helarchaeota	Meg19_1012_Bin_504_scaffold_18497_89_13	fa08b6d87d3e8145656d0edc5723d012	447	Pfam	PF01142	tRNA pseudouridine synthase D (TruD)	10	444	1.8e-111	T	23-07-2021	IPR001656	Pseudouridine synthase, TruD
Meg19_1012_Bin_504_Helarchaeota	Meg19_1012_Bin_504_scaffold_18497_89_13	fa08b6d87d3e8145656d0edc5723d012	447	TIGRFAM	TIGR00094	tRNA_TruD_broad: tRNA pseudouridine synthase, TruD family	19	447	8.5e-71	T	23-07-2021	IPR001656	Pseudouridine synthase, TruD
Meg19_1012_Bin_504_Helarchaeota	Meg19_1012_Bin_504_scaffold_18497_89_13	fa08b6d87d3e8145656d0edc5723d012	447	Hamap	MF_01082	tRNA pseudouridine synthase D [truD].	12	447	23.3632	T	23-07-2021	IPR001656	Pseudouridine synthase, TruD
Meg19_1012_Bin_504_Helarchaeota	Meg19_1012_Bin_504_scaffold_18497_89_13	fa08b6d87d3e8145656d0edc5723d012	447	PANTHER	PTHR13326:SF21	PSEUDOURIDYLATE SYNTHASE 7 HOMOLOG	69	446	2.8e-70	T	23-07-2021	-	-
Meg19_1012_Bin_504_Helarchaeota	Meg19_1012_Bin_504_scaffold_18497_89_13	fa08b6d87d3e8145656d0edc5723d012	447	Gene3D	G3DSA:3.30.2350.20	-	148	443	8.2e-104	T	23-07-2021	IPR042214	Pseudouridine synthase, TruD, catalytic domain
Meg19_1012_Bin_504_Helarchaeota	Meg19_1012_Bin_504_scaffold_18497_89_13	fa08b6d87d3e8145656d0edc5723d012	447	Gene3D	G3DSA:1.10.1510.30	-	196	284	8.2e-104	T	23-07-2021	-	-
Meg19_1012_Bin_504_Helarchaeota	Meg19_1012_Bin_504_scaffold_2514_32_31	ba1786dd5a9be8737fa73e3f69a31c43	391	Pfam	PF01565	FAD binding domain	37	177	1.7e-39	T	23-07-2021	IPR006094	FAD linked oxidase, N-terminal
Meg19_1012_Bin_504_Helarchaeota	Meg19_1012_Bin_504_scaffold_2514_32_31	ba1786dd5a9be8737fa73e3f69a31c43	391	PANTHER	PTHR11748	D-LACTATE DEHYDROGENASE	7	244	6.7e-46	T	23-07-2021	-	-
Meg19_1012_Bin_504_Helarchaeota	Meg19_1012_Bin_504_scaffold_2514_32_31	ba1786dd5a9be8737fa73e3f69a31c43	391	ProSiteProfiles	PS51387	PCMH-type FAD-binding domain profile.	32	220	23.335	T	23-07-2021	IPR016166	FAD-binding domain, PCMH-type
Meg19_1012_Bin_504_Helarchaeota	Meg19_1012_Bin_504_scaffold_2514_32_31	ba1786dd5a9be8737fa73e3f69a31c43	391	Gene3D	G3DSA:3.30.465.40	-	1	240	1.2e-57	T	23-07-2021	-	-
Meg19_1012_Bin_504_Helarchaeota	Meg19_1012_Bin_504_scaffold_2514_32_31	ba1786dd5a9be8737fa73e3f69a31c43	391	SUPERFAMILY	SSF56176	FAD-binding/transporter-associated domain-like	2	221	3e-52	T	23-07-2021	IPR036318	FAD-binding, type PCMH-like superfamily
Meg19_1012_Bin_504_Helarchaeota	Meg19_1012_Bin_504_scaffold_911_11_26	eb4d3b6c39570cc027018efc93e36dc7	803	Coils	Coil	Coil	482	502	-	T	23-07-2021	-	-
Meg19_1012_Bin_504_Helarchaeota	Meg19_1012_Bin_504_scaffold_401_3_78	3967cc5b4211584901da36c754a15a9a	552	PANTHER	PTHR11353	CHAPERONIN	7	533	1.2e-171	T	23-07-2021	-	-
Meg19_1012_Bin_504_Helarchaeota	Meg19_1012_Bin_504_scaffold_401_3_78	3967cc5b4211584901da36c754a15a9a	552	TIGRFAM	TIGR02339	thermosome_arch: thermosome, various subunits, archaeal	8	527	4.5e-203	T	23-07-2021	IPR012714	Thermosome, archaeal
Meg19_1012_Bin_504_Helarchaeota	Meg19_1012_Bin_504_scaffold_401_3_78	3967cc5b4211584901da36c754a15a9a	552	ProSitePatterns	PS00751	Chaperonins TCP-1 signature 2.	61	77	-	T	23-07-2021	IPR002194	Chaperonin TCP-1, conserved site
Meg19_1012_Bin_504_Helarchaeota	Meg19_1012_Bin_504_scaffold_401_3_78	3967cc5b4211584901da36c754a15a9a	552	Gene3D	G3DSA:3.30.260.10	GROEL	146	405	3.1e-186	T	23-07-2021	IPR027410	TCP-1-like chaperonin intermediate domain superfamily
Meg19_1012_Bin_504_Helarchaeota	Meg19_1012_Bin_504_scaffold_401_3_78	3967cc5b4211584901da36c754a15a9a	552	Gene3D	G3DSA:3.50.7.10	GroEL	218	369	3.1e-186	T	23-07-2021	IPR027409	GroEL-like apical domain superfamily
Meg19_1012_Bin_504_Helarchaeota	Meg19_1012_Bin_504_scaffold_401_3_78	3967cc5b4211584901da36c754a15a9a	552	SUPERFAMILY	SSF54849	GroEL-intermediate domain like	150	404	1.04e-25	T	23-07-2021	IPR027410	TCP-1-like chaperonin intermediate domain superfamily
Meg19_1012_Bin_504_Helarchaeota	Meg19_1012_Bin_504_scaffold_401_3_78	3967cc5b4211584901da36c754a15a9a	552	PRINTS	PR00304	Tailless complex polypeptide 1 (chaperone) signature	89	108	4.1e-30	T	23-07-2021	IPR017998	Chaperone tailless complex polypeptide 1 (TCP-1)
Meg19_1012_Bin_504_Helarchaeota	Meg19_1012_Bin_504_scaffold_401_3_78	3967cc5b4211584901da36c754a15a9a	552	PRINTS	PR00304	Tailless complex polypeptide 1 (chaperone) signature	37	53	4.1e-30	T	23-07-2021	IPR017998	Chaperone tailless complex polypeptide 1 (TCP-1)
Meg19_1012_Bin_504_Helarchaeota	Meg19_1012_Bin_504_scaffold_401_3_78	3967cc5b4211584901da36c754a15a9a	552	PRINTS	PR00304	Tailless complex polypeptide 1 (chaperone) signature	59	77	4.1e-30	T	23-07-2021	IPR017998	Chaperone tailless complex polypeptide 1 (TCP-1)
Meg19_1012_Bin_504_Helarchaeota	Meg19_1012_Bin_504_scaffold_401_3_78	3967cc5b4211584901da36c754a15a9a	552	PRINTS	PR00304	Tailless complex polypeptide 1 (chaperone) signature	408	420	4.1e-30	T	23-07-2021	IPR017998	Chaperone tailless complex polypeptide 1 (TCP-1)
Meg19_1012_Bin_504_Helarchaeota	Meg19_1012_Bin_504_scaffold_401_3_78	3967cc5b4211584901da36c754a15a9a	552	PRINTS	PR00304	Tailless complex polypeptide 1 (chaperone) signature	374	396	4.1e-30	T	23-07-2021	IPR017998	Chaperone tailless complex polypeptide 1 (TCP-1)
Meg19_1012_Bin_504_Helarchaeota	Meg19_1012_Bin_504_scaffold_401_3_78	3967cc5b4211584901da36c754a15a9a	552	SUPERFAMILY	SSF48592	GroEL equatorial domain-like	17	525	7.72e-84	T	23-07-2021	IPR027413	GroEL-like equatorial domain superfamily
Meg19_1012_Bin_504_Helarchaeota	Meg19_1012_Bin_504_scaffold_401_3_78	3967cc5b4211584901da36c754a15a9a	552	SUPERFAMILY	SSF52029	GroEL apical domain-like	213	379	5.23e-51	T	23-07-2021	IPR027409	GroEL-like apical domain superfamily
Meg19_1012_Bin_504_Helarchaeota	Meg19_1012_Bin_504_scaffold_401_3_78	3967cc5b4211584901da36c754a15a9a	552	Gene3D	G3DSA:1.10.560.10	GROEL	28	523	3.1e-186	T	23-07-2021	IPR027413	GroEL-like equatorial domain superfamily
Meg19_1012_Bin_504_Helarchaeota	Meg19_1012_Bin_504_scaffold_401_3_78	3967cc5b4211584901da36c754a15a9a	552	Pfam	PF00118	TCP-1/cpn60 chaperonin family	35	527	2.3e-162	T	23-07-2021	IPR002423	Chaperonin Cpn60/TCP-1 family
Meg19_1012_Bin_504_Helarchaeota	Meg19_1012_Bin_504_scaffold_401_3_78	3967cc5b4211584901da36c754a15a9a	552	ProSitePatterns	PS00750	Chaperonins TCP-1 signature 1.	40	52	-	T	23-07-2021	IPR002194	Chaperonin TCP-1, conserved site
Meg19_1012_Bin_504_Helarchaeota	Meg19_1012_Bin_504_scaffold_401_3_78	3967cc5b4211584901da36c754a15a9a	552	PANTHER	PTHR11353:SF207	THERMOSOME SUBUNIT ALPHA	7	533	1.2e-171	T	23-07-2021	-	-
Meg22_1214_Bin_191_Lokiarchaeota	Meg22_1214_Bin_191_scaffold_15607_80_14	533346950120b13b8f6afa0921a2388c	420	Pfam	PF07690	Major Facilitator Superfamily	266	407	8.3e-20	T	23-07-2021	IPR011701	Major facilitator superfamily
Meg22_1214_Bin_191_Lokiarchaeota	Meg22_1214_Bin_191_scaffold_15607_80_14	533346950120b13b8f6afa0921a2388c	420	Pfam	PF07690	Major Facilitator Superfamily	35	240	4.1e-09	T	23-07-2021	IPR011701	Major facilitator superfamily
Meg22_1214_Bin_191_Lokiarchaeota	Meg22_1214_Bin_191_scaffold_15607_80_14	533346950120b13b8f6afa0921a2388c	420	Gene3D	G3DSA:1.20.1250.20	MFS general substrate transporter like domains	27	211	4.4e-15	T	23-07-2021	-	-
Meg22_1214_Bin_191_Lokiarchaeota	Meg22_1214_Bin_191_scaffold_15607_80_14	533346950120b13b8f6afa0921a2388c	420	PANTHER	PTHR23518	C-METHYLTRANSFERASE	29	405	5.2e-69	T	23-07-2021	-	-
Meg22_1214_Bin_191_Lokiarchaeota	Meg22_1214_Bin_191_scaffold_15607_80_14	533346950120b13b8f6afa0921a2388c	420	CDD	cd17370	MFS_MJ1317_like	30	405	2.99813e-100	T	23-07-2021	-	-
Meg22_1214_Bin_191_Lokiarchaeota	Meg22_1214_Bin_191_scaffold_15607_80_14	533346950120b13b8f6afa0921a2388c	420	MobiDBLite	mobidb-lite	consensus disorder prediction	1	20	-	T	23-07-2021	-	-
Meg22_1214_Bin_191_Lokiarchaeota	Meg22_1214_Bin_191_scaffold_15607_80_14	533346950120b13b8f6afa0921a2388c	420	SUPERFAMILY	SSF103473	MFS general substrate transporter	30	407	1.12e-47	T	23-07-2021	IPR036259	MFS transporter superfamily
Meg22_1214_Bin_191_Lokiarchaeota	Meg22_1214_Bin_191_scaffold_15607_80_14	533346950120b13b8f6afa0921a2388c	420	Gene3D	G3DSA:1.20.1250.20	MFS general substrate transporter like domains	233	414	8.8e-23	T	23-07-2021	-	-
Meg22_1214_Bin_191_Lokiarchaeota	Meg22_1214_Bin_191_scaffold_15607_80_14	533346950120b13b8f6afa0921a2388c	420	ProSiteProfiles	PS50850	Major facilitator superfamily (MFS) profile.	29	413	21.714	T	23-07-2021	IPR020846	Major facilitator superfamily domain
Meg19_1012_Bin_504_Helarchaeota	Meg19_1012_Bin_504_scaffold_5341_51_6	ad33bed0ca69c0856e5661aef6e0d29b	385	Pfam	PF07786	Protein of unknown function (DUF1624)	1	238	2.8e-09	T	23-07-2021	IPR012429	Heparan-alpha-glucosaminide N-acetyltransferase, catalytic domain
Meg19_1012_Bin_504_Helarchaeota	Meg19_1012_Bin_504_scaffold_4119_44_20	d5a27d01093c91f41dcfbeb208988ae3	171	CDD	cd00090	HTH_ARSR	119	157	2.60254e-05	T	23-07-2021	IPR011991	ArsR-like helix-turn-helix domain
Meg19_1012_Bin_504_Helarchaeota	Meg19_1012_Bin_504_scaffold_4119_44_20	d5a27d01093c91f41dcfbeb208988ae3	171	Gene3D	G3DSA:1.10.10.10	winged helix"" repressor DNA binding domain	106	170	5.6e-07	T	23-07-2021	IPR036388	Winged helix-like DNA-binding domain superfamily
Meg19_1012_Bin_504_Helarchaeota	Meg19_1012_Bin_504_scaffold_4119_44_20	d5a27d01093c91f41dcfbeb208988ae3	171	SUPERFAMILY	SSF46785	Winged helix DNA-binding domain	119	164	3.11e-07	T	23-07-2021	IPR036390	Winged helix DNA-binding domain superfamily
Meg19_1012_Bin_504_Helarchaeota	Meg19_1012_Bin_504_scaffold_4119_44_20	d5a27d01093c91f41dcfbeb208988ae3	171	Pfam	PF01022	Bacterial regulatory protein, arsR family	119	156	7.1e-05	T	23-07-2021	IPR001845	HTH ArsR-type DNA-binding domain
Meg22_1012_Bin_233_Lokiarchaeota	Meg22_1012_Bin_233_scaffold_6507_53_3	cec6d7aa1014058a230710cb5c560382	813	Hamap	MF_01897	DNA gyrase subunit A [gyrA].	4	808	22.7031	T	23-07-2021	IPR005743	DNA gyrase, subunit A
Meg22_1012_Bin_233_Lokiarchaeota	Meg22_1012_Bin_233_scaffold_6507_53_3	cec6d7aa1014058a230710cb5c560382	813	CDD	cd00187	TOP4c	28	470	0	T	23-07-2021	IPR002205	DNA topoisomerase, type IIA, subunit A/C-terminal
Meg22_1012_Bin_233_Lokiarchaeota	Meg22_1012_Bin_233_scaffold_6507_53_3	cec6d7aa1014058a230710cb5c560382	813	Pfam	PF03989	DNA gyrase C-terminal domain, beta-propeller	554	604	6.2e-12	T	23-07-2021	IPR006691	DNA gyrase/topoisomerase IV, subunit A, C-terminal repeat
Meg22_1012_Bin_233_Lokiarchaeota	Meg22_1012_Bin_233_scaffold_6507_53_3	cec6d7aa1014058a230710cb5c560382	813	Pfam	PF03989	DNA gyrase C-terminal domain, beta-propeller	507	551	5.6e-11	T	23-07-2021	IPR006691	DNA gyrase/topoisomerase IV, subunit A, C-terminal repeat
Meg22_1012_Bin_233_Lokiarchaeota	Meg22_1012_Bin_233_scaffold_6507_53_3	cec6d7aa1014058a230710cb5c560382	813	Pfam	PF03989	DNA gyrase C-terminal domain, beta-propeller	761	803	1.2e-12	T	23-07-2021	IPR006691	DNA gyrase/topoisomerase IV, subunit A, C-terminal repeat
Meg22_1012_Bin_233_Lokiarchaeota	Meg22_1012_Bin_233_scaffold_6507_53_3	cec6d7aa1014058a230710cb5c560382	813	Pfam	PF03989	DNA gyrase C-terminal domain, beta-propeller	709	753	1.4e-09	T	23-07-2021	IPR006691	DNA gyrase/topoisomerase IV, subunit A, C-terminal repeat
Meg22_1012_Bin_233_Lokiarchaeota	Meg22_1012_Bin_233_scaffold_6507_53_3	cec6d7aa1014058a230710cb5c560382	813	Pfam	PF03989	DNA gyrase C-terminal domain, beta-propeller	611	651	7e-07	T	23-07-2021	IPR006691	DNA gyrase/topoisomerase IV, subunit A, C-terminal repeat
Meg22_1012_Bin_233_Lokiarchaeota	Meg22_1012_Bin_233_scaffold_6507_53_3	cec6d7aa1014058a230710cb5c560382	813	Pfam	PF03989	DNA gyrase C-terminal domain, beta-propeller	659	705	6.9e-15	T	23-07-2021	IPR006691	DNA gyrase/topoisomerase IV, subunit A, C-terminal repeat
Meg22_1012_Bin_233_Lokiarchaeota	Meg22_1012_Bin_233_scaffold_6507_53_3	cec6d7aa1014058a230710cb5c560382	813	TIGRFAM	TIGR01063	gyrA: DNA gyrase, A subunit	6	807	0	T	23-07-2021	-	-
Meg22_1012_Bin_233_Lokiarchaeota	Meg22_1012_Bin_233_scaffold_6507_53_3	cec6d7aa1014058a230710cb5c560382	813	SUPERFAMILY	SSF101904	GyrA/ParC C-terminal domain-like	499	806	2.22e-94	T	23-07-2021	IPR035516	DNA gyrase/topoisomerase IV, subunit A, C-terminal
Meg22_1012_Bin_233_Lokiarchaeota	Meg22_1012_Bin_233_scaffold_6507_53_3	cec6d7aa1014058a230710cb5c560382	813	Gene3D	G3DSA:1.10.268.10	Topoisomerase	368	456	4e-200	T	23-07-2021	IPR013757	Type IIA DNA topoisomerase subunit A, alpha-helical domain superfamily
Meg22_1012_Bin_233_Lokiarchaeota	Meg22_1012_Bin_233_scaffold_6507_53_3	cec6d7aa1014058a230710cb5c560382	813	Pfam	PF00521	DNA gyrase/topoisomerase IV, subunit A	30	470	2.1e-156	T	23-07-2021	IPR002205	DNA topoisomerase, type IIA, subunit A/C-terminal
Meg22_1012_Bin_233_Lokiarchaeota	Meg22_1012_Bin_233_scaffold_6507_53_3	cec6d7aa1014058a230710cb5c560382	813	Coils	Coil	Coil	449	476	-	T	23-07-2021	-	-
Meg22_1012_Bin_233_Lokiarchaeota	Meg22_1012_Bin_233_scaffold_6507_53_3	cec6d7aa1014058a230710cb5c560382	813	Gene3D	G3DSA:3.30.1360.40	-	234	329	4e-200	T	23-07-2021	-	-
Meg22_1012_Bin_233_Lokiarchaeota	Meg22_1012_Bin_233_scaffold_6507_53_3	cec6d7aa1014058a230710cb5c560382	813	PANTHER	PTHR43493	DNA GYRASE/TOPOISOMERASE SUBUNIT A	5	810	0	T	23-07-2021	-	-
Meg22_1012_Bin_233_Lokiarchaeota	Meg22_1012_Bin_233_scaffold_6507_53_3	cec6d7aa1014058a230710cb5c560382	813	Gene3D	G3DSA:3.90.199.10	Topoisomerase II	30	485	4e-200	T	23-07-2021	IPR013758	DNA topoisomerase, type IIA, subunit A/ C-terminal, alpha-beta
Meg22_1012_Bin_233_Lokiarchaeota	Meg22_1012_Bin_233_scaffold_6507_53_3	cec6d7aa1014058a230710cb5c560382	813	SUPERFAMILY	SSF56719	Type II DNA topoisomerase	29	485	5.49e-169	T	23-07-2021	IPR013760	DNA topoisomerase, type IIA-like domain superfamily
Meg22_1012_Bin_233_Lokiarchaeota	Meg22_1012_Bin_233_scaffold_6507_53_3	cec6d7aa1014058a230710cb5c560382	813	SMART	SM00434	topIV4	9	463	4.1e-243	T	23-07-2021	IPR002205	DNA topoisomerase, type IIA, subunit A/C-terminal
Meg22_1012_Bin_233_Lokiarchaeota	Meg22_1012_Bin_233_scaffold_6507_53_3	cec6d7aa1014058a230710cb5c560382	813	Gene3D	G3DSA:2.120.10.90	-	497	806	1.4e-108	T	23-07-2021	IPR035516	DNA gyrase/topoisomerase IV, subunit A, C-terminal
Meg22_1012_Bin_233_Lokiarchaeota	Meg22_1012_Bin_233_scaffold_6507_53_3	cec6d7aa1014058a230710cb5c560382	813	PANTHER	PTHR43493:SF5	DNA GYRASE SUBUNIT A, CHLOROPLASTIC/MITOCHONDRIAL	5	810	0	T	23-07-2021	-	-
Meg22_1416_Bin_151_Lokiarchaeota	Meg22_1416_Bin_151_scaffold_2340_48_12	cec6d7aa1014058a230710cb5c560382	813	Hamap	MF_01897	DNA gyrase subunit A [gyrA].	4	808	22.7031	T	23-07-2021	IPR005743	DNA gyrase, subunit A
Meg22_1416_Bin_151_Lokiarchaeota	Meg22_1416_Bin_151_scaffold_2340_48_12	cec6d7aa1014058a230710cb5c560382	813	CDD	cd00187	TOP4c	28	470	0	T	23-07-2021	IPR002205	DNA topoisomerase, type IIA, subunit A/C-terminal
Meg22_1416_Bin_151_Lokiarchaeota	Meg22_1416_Bin_151_scaffold_2340_48_12	cec6d7aa1014058a230710cb5c560382	813	Pfam	PF03989	DNA gyrase C-terminal domain, beta-propeller	554	604	6.2e-12	T	23-07-2021	IPR006691	DNA gyrase/topoisomerase IV, subunit A, C-terminal repeat
Meg22_1416_Bin_151_Lokiarchaeota	Meg22_1416_Bin_151_scaffold_2340_48_12	cec6d7aa1014058a230710cb5c560382	813	Pfam	PF03989	DNA gyrase C-terminal domain, beta-propeller	507	551	5.6e-11	T	23-07-2021	IPR006691	DNA gyrase/topoisomerase IV, subunit A, C-terminal repeat
Meg22_1416_Bin_151_Lokiarchaeota	Meg22_1416_Bin_151_scaffold_2340_48_12	cec6d7aa1014058a230710cb5c560382	813	Pfam	PF03989	DNA gyrase C-terminal domain, beta-propeller	761	803	1.2e-12	T	23-07-2021	IPR006691	DNA gyrase/topoisomerase IV, subunit A, C-terminal repeat
Meg22_1416_Bin_151_Lokiarchaeota	Meg22_1416_Bin_151_scaffold_2340_48_12	cec6d7aa1014058a230710cb5c560382	813	Pfam	PF03989	DNA gyrase C-terminal domain, beta-propeller	709	753	1.4e-09	T	23-07-2021	IPR006691	DNA gyrase/topoisomerase IV, subunit A, C-terminal repeat
Meg22_1416_Bin_151_Lokiarchaeota	Meg22_1416_Bin_151_scaffold_2340_48_12	cec6d7aa1014058a230710cb5c560382	813	Pfam	PF03989	DNA gyrase C-terminal domain, beta-propeller	611	651	7e-07	T	23-07-2021	IPR006691	DNA gyrase/topoisomerase IV, subunit A, C-terminal repeat
Meg22_1416_Bin_151_Lokiarchaeota	Meg22_1416_Bin_151_scaffold_2340_48_12	cec6d7aa1014058a230710cb5c560382	813	Pfam	PF03989	DNA gyrase C-terminal domain, beta-propeller	659	705	6.9e-15	T	23-07-2021	IPR006691	DNA gyrase/topoisomerase IV, subunit A, C-terminal repeat
Meg22_1416_Bin_151_Lokiarchaeota	Meg22_1416_Bin_151_scaffold_2340_48_12	cec6d7aa1014058a230710cb5c560382	813	TIGRFAM	TIGR01063	gyrA: DNA gyrase, A subunit	6	807	0	T	23-07-2021	-	-
Meg22_1416_Bin_151_Lokiarchaeota	Meg22_1416_Bin_151_scaffold_2340_48_12	cec6d7aa1014058a230710cb5c560382	813	SUPERFAMILY	SSF101904	GyrA/ParC C-terminal domain-like	499	806	2.22e-94	T	23-07-2021	IPR035516	DNA gyrase/topoisomerase IV, subunit A, C-terminal
Meg22_1416_Bin_151_Lokiarchaeota	Meg22_1416_Bin_151_scaffold_2340_48_12	cec6d7aa1014058a230710cb5c560382	813	Gene3D	G3DSA:1.10.268.10	Topoisomerase	368	456	4e-200	T	23-07-2021	IPR013757	Type IIA DNA topoisomerase subunit A, alpha-helical domain superfamily
Meg22_1416_Bin_151_Lokiarchaeota	Meg22_1416_Bin_151_scaffold_2340_48_12	cec6d7aa1014058a230710cb5c560382	813	Pfam	PF00521	DNA gyrase/topoisomerase IV, subunit A	30	470	2.1e-156	T	23-07-2021	IPR002205	DNA topoisomerase, type IIA, subunit A/C-terminal
Meg22_1416_Bin_151_Lokiarchaeota	Meg22_1416_Bin_151_scaffold_2340_48_12	cec6d7aa1014058a230710cb5c560382	813	Coils	Coil	Coil	449	476	-	T	23-07-2021	-	-
Meg22_1416_Bin_151_Lokiarchaeota	Meg22_1416_Bin_151_scaffold_2340_48_12	cec6d7aa1014058a230710cb5c560382	813	Gene3D	G3DSA:3.30.1360.40	-	234	329	4e-200	T	23-07-2021	-	-
Meg22_1416_Bin_151_Lokiarchaeota	Meg22_1416_Bin_151_scaffold_2340_48_12	cec6d7aa1014058a230710cb5c560382	813	PANTHER	PTHR43493	DNA GYRASE/TOPOISOMERASE SUBUNIT A	5	810	0	T	23-07-2021	-	-
Meg22_1416_Bin_151_Lokiarchaeota	Meg22_1416_Bin_151_scaffold_2340_48_12	cec6d7aa1014058a230710cb5c560382	813	Gene3D	G3DSA:3.90.199.10	Topoisomerase II	30	485	4e-200	T	23-07-2021	IPR013758	DNA topoisomerase, type IIA, subunit A/ C-terminal, alpha-beta
Meg22_1416_Bin_151_Lokiarchaeota	Meg22_1416_Bin_151_scaffold_2340_48_12	cec6d7aa1014058a230710cb5c560382	813	SUPERFAMILY	SSF56719	Type II DNA topoisomerase	29	485	5.49e-169	T	23-07-2021	IPR013760	DNA topoisomerase, type IIA-like domain superfamily
Meg22_1416_Bin_151_Lokiarchaeota	Meg22_1416_Bin_151_scaffold_2340_48_12	cec6d7aa1014058a230710cb5c560382	813	SMART	SM00434	topIV4	9	463	4.1e-243	T	23-07-2021	IPR002205	DNA topoisomerase, type IIA, subunit A/C-terminal
Meg22_1416_Bin_151_Lokiarchaeota	Meg22_1416_Bin_151_scaffold_2340_48_12	cec6d7aa1014058a230710cb5c560382	813	Gene3D	G3DSA:2.120.10.90	-	497	806	1.4e-108	T	23-07-2021	IPR035516	DNA gyrase/topoisomerase IV, subunit A, C-terminal
Meg22_1416_Bin_151_Lokiarchaeota	Meg22_1416_Bin_151_scaffold_2340_48_12	cec6d7aa1014058a230710cb5c560382	813	PANTHER	PTHR43493:SF5	DNA GYRASE SUBUNIT A, CHLOROPLASTIC/MITOCHONDRIAL	5	810	0	T	23-07-2021	-	-
Meg22_1214_Bin_191_Lokiarchaeota	Meg22_1214_Bin_191_scaffold_7758_59_3	cec6d7aa1014058a230710cb5c560382	813	Hamap	MF_01897	DNA gyrase subunit A [gyrA].	4	808	22.7031	T	23-07-2021	IPR005743	DNA gyrase, subunit A
Meg22_1214_Bin_191_Lokiarchaeota	Meg22_1214_Bin_191_scaffold_7758_59_3	cec6d7aa1014058a230710cb5c560382	813	CDD	cd00187	TOP4c	28	470	0	T	23-07-2021	IPR002205	DNA topoisomerase, type IIA, subunit A/C-terminal
Meg22_1214_Bin_191_Lokiarchaeota	Meg22_1214_Bin_191_scaffold_7758_59_3	cec6d7aa1014058a230710cb5c560382	813	Pfam	PF03989	DNA gyrase C-terminal domain, beta-propeller	554	604	6.2e-12	T	23-07-2021	IPR006691	DNA gyrase/topoisomerase IV, subunit A, C-terminal repeat
Meg22_1214_Bin_191_Lokiarchaeota	Meg22_1214_Bin_191_scaffold_7758_59_3	cec6d7aa1014058a230710cb5c560382	813	Pfam	PF03989	DNA gyrase C-terminal domain, beta-propeller	507	551	5.6e-11	T	23-07-2021	IPR006691	DNA gyrase/topoisomerase IV, subunit A, C-terminal repeat
Meg22_1214_Bin_191_Lokiarchaeota	Meg22_1214_Bin_191_scaffold_7758_59_3	cec6d7aa1014058a230710cb5c560382	813	Pfam	PF03989	DNA gyrase C-terminal domain, beta-propeller	761	803	1.2e-12	T	23-07-2021	IPR006691	DNA gyrase/topoisomerase IV, subunit A, C-terminal repeat
Meg22_1214_Bin_191_Lokiarchaeota	Meg22_1214_Bin_191_scaffold_7758_59_3	cec6d7aa1014058a230710cb5c560382	813	Pfam	PF03989	DNA gyrase C-terminal domain, beta-propeller	709	753	1.4e-09	T	23-07-2021	IPR006691	DNA gyrase/topoisomerase IV, subunit A, C-terminal repeat
Meg22_1214_Bin_191_Lokiarchaeota	Meg22_1214_Bin_191_scaffold_7758_59_3	cec6d7aa1014058a230710cb5c560382	813	Pfam	PF03989	DNA gyrase C-terminal domain, beta-propeller	611	651	7e-07	T	23-07-2021	IPR006691	DNA gyrase/topoisomerase IV, subunit A, C-terminal repeat
Meg22_1214_Bin_191_Lokiarchaeota	Meg22_1214_Bin_191_scaffold_7758_59_3	cec6d7aa1014058a230710cb5c560382	813	Pfam	PF03989	DNA gyrase C-terminal domain, beta-propeller	659	705	6.9e-15	T	23-07-2021	IPR006691	DNA gyrase/topoisomerase IV, subunit A, C-terminal repeat
Meg22_1214_Bin_191_Lokiarchaeota	Meg22_1214_Bin_191_scaffold_7758_59_3	cec6d7aa1014058a230710cb5c560382	813	TIGRFAM	TIGR01063	gyrA: DNA gyrase, A subunit	6	807	0	T	23-07-2021	-	-
Meg22_1214_Bin_191_Lokiarchaeota	Meg22_1214_Bin_191_scaffold_7758_59_3	cec6d7aa1014058a230710cb5c560382	813	SUPERFAMILY	SSF101904	GyrA/ParC C-terminal domain-like	499	806	2.22e-94	T	23-07-2021	IPR035516	DNA gyrase/topoisomerase IV, subunit A, C-terminal
Meg22_1214_Bin_191_Lokiarchaeota	Meg22_1214_Bin_191_scaffold_7758_59_3	cec6d7aa1014058a230710cb5c560382	813	Gene3D	G3DSA:1.10.268.10	Topoisomerase	368	456	4e-200	T	23-07-2021	IPR013757	Type IIA DNA topoisomerase subunit A, alpha-helical domain superfamily
Meg22_1214_Bin_191_Lokiarchaeota	Meg22_1214_Bin_191_scaffold_7758_59_3	cec6d7aa1014058a230710cb5c560382	813	Pfam	PF00521	DNA gyrase/topoisomerase IV, subunit A	30	470	2.1e-156	T	23-07-2021	IPR002205	DNA topoisomerase, type IIA, subunit A/C-terminal
Meg22_1214_Bin_191_Lokiarchaeota	Meg22_1214_Bin_191_scaffold_7758_59_3	cec6d7aa1014058a230710cb5c560382	813	Coils	Coil	Coil	449	476	-	T	23-07-2021	-	-
Meg22_1214_Bin_191_Lokiarchaeota	Meg22_1214_Bin_191_scaffold_7758_59_3	cec6d7aa1014058a230710cb5c560382	813	Gene3D	G3DSA:3.30.1360.40	-	234	329	4e-200	T	23-07-2021	-	-
Meg22_1214_Bin_191_Lokiarchaeota	Meg22_1214_Bin_191_scaffold_7758_59_3	cec6d7aa1014058a230710cb5c560382	813	PANTHER	PTHR43493	DNA GYRASE/TOPOISOMERASE SUBUNIT A	5	810	0	T	23-07-2021	-	-
Meg22_1214_Bin_191_Lokiarchaeota	Meg22_1214_Bin_191_scaffold_7758_59_3	cec6d7aa1014058a230710cb5c560382	813	Gene3D	G3DSA:3.90.199.10	Topoisomerase II	30	485	4e-200	T	23-07-2021	IPR013758	DNA topoisomerase, type IIA, subunit A/ C-terminal, alpha-beta
Meg22_1214_Bin_191_Lokiarchaeota	Meg22_1214_Bin_191_scaffold_7758_59_3	cec6d7aa1014058a230710cb5c560382	813	SUPERFAMILY	SSF56719	Type II DNA topoisomerase	29	485	5.49e-169	T	23-07-2021	IPR013760	DNA topoisomerase, type IIA-like domain superfamily
Meg22_1214_Bin_191_Lokiarchaeota	Meg22_1214_Bin_191_scaffold_7758_59_3	cec6d7aa1014058a230710cb5c560382	813	SMART	SM00434	topIV4	9	463	4.1e-243	T	23-07-2021	IPR002205	DNA topoisomerase, type IIA, subunit A/C-terminal
Meg22_1214_Bin_191_Lokiarchaeota	Meg22_1214_Bin_191_scaffold_7758_59_3	cec6d7aa1014058a230710cb5c560382	813	Gene3D	G3DSA:2.120.10.90	-	497	806	1.4e-108	T	23-07-2021	IPR035516	DNA gyrase/topoisomerase IV, subunit A, C-terminal
Meg22_1214_Bin_191_Lokiarchaeota	Meg22_1214_Bin_191_scaffold_7758_59_3	cec6d7aa1014058a230710cb5c560382	813	PANTHER	PTHR43493:SF5	DNA GYRASE SUBUNIT A, CHLOROPLASTIC/MITOCHONDRIAL	5	810	0	T	23-07-2021	-	-
Meg19_1012_Bin_504_Helarchaeota	Meg19_1012_Bin_504_scaffold_3019_37_4	8ab16127c8c35319860cda451aa38ec7	266	Pfam	PF01869	BadF/BadG/BcrA/BcrD ATPase family	8	258	6.2e-35	T	23-07-2021	IPR002731	ATPase, BadF/BadG/BcrA/BcrD type
Meg19_1012_Bin_504_Helarchaeota	Meg19_1012_Bin_504_scaffold_3019_37_4	8ab16127c8c35319860cda451aa38ec7	266	SUPERFAMILY	SSF53067	Actin-like ATPase domain	6	258	8.42e-23	T	23-07-2021	IPR043129	ATPase, nucleotide binding domain
Meg19_1012_Bin_504_Helarchaeota	Meg19_1012_Bin_504_scaffold_3019_37_4	8ab16127c8c35319860cda451aa38ec7	266	TIGRFAM	TIGR00241	CoA_E_activ: putative CoA-substrate-specific enzyme activase	7	257	1.6e-49	T	23-07-2021	IPR008275	CoA enzyme activase
Meg19_1012_Bin_504_Helarchaeota	Meg19_1012_Bin_504_scaffold_3019_37_4	8ab16127c8c35319860cda451aa38ec7	266	Gene3D	G3DSA:3.30.420.40	-	8	258	6.7e-55	T	23-07-2021	-	-
Meg19_1012_Bin_504_Helarchaeota	Meg19_1012_Bin_504_scaffold_3019_37_4	8ab16127c8c35319860cda451aa38ec7	266	PANTHER	PTHR32329:SF2	BIFUNCTIONAL PROTEIN [INCLUDES 2-HYDROXYACYL-COA DEHYDRATASE (N-TER) AND ITS ACTIVATOR DOMAIN (C_TERM)-RELATED	6	261	2.2e-45	T	23-07-2021	-	-
Meg19_1012_Bin_504_Helarchaeota	Meg19_1012_Bin_504_scaffold_3019_37_4	8ab16127c8c35319860cda451aa38ec7	266	PANTHER	PTHR32329	BIFUNCTIONAL PROTEIN [INCLUDES 2-HYDROXYACYL-COA DEHYDRATASE (N-TER) AND ITS ACTIVATOR DOMAIN (C_TERM)-RELATED	6	261	2.2e-45	T	23-07-2021	-	-
Meg19_1012_Bin_504_Helarchaeota	Meg19_1012_Bin_504_scaffold_3019_37_4	8ab16127c8c35319860cda451aa38ec7	266	Gene3D	G3DSA:3.30.420.40	-	100	241	6.7e-55	T	23-07-2021	-	-
Meg22_1416_Bin_151_Lokiarchaeota	Meg22_1416_Bin_151_scaffold_12595_94_2	1970289574073d73dd213487e6922b5b	367	Pfam	PF02073	Thermophilic metalloprotease (M29)	5	364	7.9e-85	T	23-07-2021	IPR000787	Peptidase M29
Meg22_1416_Bin_151_Lokiarchaeota	Meg22_1416_Bin_151_scaffold_12595_94_2	1970289574073d73dd213487e6922b5b	367	PANTHER	PTHR34448	AMINOPEPTIDASE	5	365	6.1e-76	T	23-07-2021	-	-
Meg22_1416_Bin_151_Lokiarchaeota	Meg22_1416_Bin_151_scaffold_12595_94_2	1970289574073d73dd213487e6922b5b	367	SUPERFAMILY	SSF144052	Thermophilic metalloprotease-like	5	366	8.37e-97	T	23-07-2021	-	-
Meg22_1416_Bin_151_Lokiarchaeota	Meg22_1416_Bin_151_scaffold_12595_94_2	1970289574073d73dd213487e6922b5b	367	Gene3D	G3DSA:3.40.1830.10	Thermophilic metalloprotease (M29)	4	168	8.8e-17	T	23-07-2021	IPR035097	Peptidase M29, N-terminal
Meg19_1012_Bin_504_Helarchaeota	Meg19_1012_Bin_504_scaffold_911_11_36	05da6a498856b9098a86b8a327d0b003	807	CDD	cd04301	NAT_SF	577	613	0.00275643	T	23-07-2021	-	-
Meg19_1012_Bin_504_Helarchaeota	Meg19_1012_Bin_504_scaffold_911_11_36	05da6a498856b9098a86b8a327d0b003	807	Pfam	PF13725	Possible tRNA binding domain	709	800	5.2e-09	T	23-07-2021	IPR027992	Possible tRNA binding domain
Meg19_1012_Bin_504_Helarchaeota	Meg19_1012_Bin_504_scaffold_911_11_36	05da6a498856b9098a86b8a327d0b003	807	ProSiteProfiles	PS51186	Gcn5-related N-acetyltransferase (GNAT) domain profile.	517	657	10.105	T	23-07-2021	IPR000182	GNAT domain
Meg19_1012_Bin_504_Helarchaeota	Meg19_1012_Bin_504_scaffold_911_11_36	05da6a498856b9098a86b8a327d0b003	807	SUPERFAMILY	SSF55729	Acyl-CoA N-acyltransferases (Nat)	568	655	5.41e-10	T	23-07-2021	IPR016181	Acyl-CoA N-acyltransferase
Meg19_1012_Bin_504_Helarchaeota	Meg19_1012_Bin_504_scaffold_911_11_36	05da6a498856b9098a86b8a327d0b003	807	Pfam	PF05127	Helicase	260	447	8.1e-41	T	23-07-2021	IPR007807	Helicase domain
Meg19_1012_Bin_504_Helarchaeota	Meg19_1012_Bin_504_scaffold_911_11_36	05da6a498856b9098a86b8a327d0b003	807	Pfam	PF08351	Domain of unknown function (DUF1726)	100	193	2.6e-09	T	23-07-2021	IPR013562	tRNA(Met) cytidine acetyltransferase TmcA, N-terminal
Meg19_1012_Bin_504_Helarchaeota	Meg19_1012_Bin_504_scaffold_911_11_36	05da6a498856b9098a86b8a327d0b003	807	Pfam	PF13718	GNAT acetyltransferase 2	492	607	5.1e-26	T	23-07-2021	IPR000182	GNAT domain
Meg19_1012_Bin_504_Helarchaeota	Meg19_1012_Bin_504_scaffold_911_11_36	05da6a498856b9098a86b8a327d0b003	807	Pfam	PF13718	GNAT acetyltransferase 2	609	656	1.1e-11	T	23-07-2021	IPR000182	GNAT domain
Meg19_1012_Bin_504_Helarchaeota	Meg19_1012_Bin_504_scaffold_911_11_36	05da6a498856b9098a86b8a327d0b003	807	PANTHER	PTHR10925	N-ACETYLTRANSFERASE 10	13	800	6.1e-115	T	23-07-2021	IPR032672	TmcA/NAT10/Kre33
Meg19_1012_Bin_504_Helarchaeota	Meg19_1012_Bin_504_scaffold_911_11_36	05da6a498856b9098a86b8a327d0b003	807	Gene3D	G3DSA:3.40.630.30	-	458	654	1.8e-44	T	23-07-2021	-	-
Meg19_1012_Bin_504_Helarchaeota	Meg19_1012_Bin_504_scaffold_911_11_36	05da6a498856b9098a86b8a327d0b003	807	Gene3D	G3DSA:3.40.50.11040	-	63	185	3.8e-06	T	23-07-2021	-	-
Meg22_1416_Bin_151_Lokiarchaeota	Meg22_1416_Bin_151_scaffold_68865_157_5	1a0a624159ca18a5b7dbb132f740cdd4	164	Pfam	PF00025	ADP-ribosylation factor family	90	163	5.6e-08	T	23-07-2021	IPR006689	Small GTPase superfamily, ARF/SAR type
Meg22_1416_Bin_151_Lokiarchaeota	Meg22_1416_Bin_151_scaffold_68865_157_5	1a0a624159ca18a5b7dbb132f740cdd4	164	Gene3D	G3DSA:3.40.50.300	-	7	164	2.7e-46	T	23-07-2021	-	-
Meg22_1416_Bin_151_Lokiarchaeota	Meg22_1416_Bin_151_scaffold_68865_157_5	1a0a624159ca18a5b7dbb132f740cdd4	164	SUPERFAMILY	SSF52540	P-loop containing nucleoside triphosphate hydrolases	19	158	2.11e-17	T	23-07-2021	IPR027417	P-loop containing nucleoside triphosphate hydrolase
Meg22_1012_Bin_233_Lokiarchaeota	Meg22_1012_Bin_233_scaffold_580_20_30	7fe0a422da592e84acb32366b2779cc8	88	MobiDBLite	mobidb-lite	consensus disorder prediction	49	88	-	T	23-07-2021	-	-
Meg22_1214_Bin_191_Lokiarchaeota	Meg22_1214_Bin_191_scaffold_9642_66_35	7fe0a422da592e84acb32366b2779cc8	88	MobiDBLite	mobidb-lite	consensus disorder prediction	49	88	-	T	23-07-2021	-	-
Meg22_1416_Bin_151_Lokiarchaeota	Meg22_1416_Bin_151_scaffold_1442_36_2	7fe0a422da592e84acb32366b2779cc8	88	MobiDBLite	mobidb-lite	consensus disorder prediction	49	88	-	T	23-07-2021	-	-
Meg22_1012_Bin_233_Lokiarchaeota	Meg22_1012_Bin_233_scaffold_2162_36_50	fff3040d2cfdd1f7c36a05ee84a2b09a	418	PANTHER	PTHR30108	3-OCTAPRENYL-4-HYDROXYBENZOATE CARBOXY-LYASE-RELATED	18	411	1.6e-89	T	23-07-2021	IPR002830	UbiD decarboxylyase family
Meg22_1012_Bin_233_Lokiarchaeota	Meg22_1012_Bin_233_scaffold_2162_36_50	fff3040d2cfdd1f7c36a05ee84a2b09a	418	Pfam	PF01977	3-octaprenyl-4-hydroxybenzoate carboxy-lyase	21	382	4e-80	T	23-07-2021	IPR002830	UbiD decarboxylyase family
Meg22_1012_Bin_233_Lokiarchaeota	Meg22_1012_Bin_233_scaffold_2162_36_50	fff3040d2cfdd1f7c36a05ee84a2b09a	418	SUPERFAMILY	SSF143968	UbiD C-terminal domain-like	279	408	1.57e-42	T	23-07-2021	-	-
Meg22_1012_Bin_233_Lokiarchaeota	Meg22_1012_Bin_233_scaffold_2162_36_50	fff3040d2cfdd1f7c36a05ee84a2b09a	418	PANTHER	PTHR30108:SF17	FERULIC ACID DECARBOXYLASE 1	18	411	1.6e-89	T	23-07-2021	-	-
Meg22_1012_Bin_233_Lokiarchaeota	Meg22_1012_Bin_233_scaffold_2162_36_50	fff3040d2cfdd1f7c36a05ee84a2b09a	418	Gene3D	G3DSA:3.40.1670.10	-	293	405	1.2e-38	T	23-07-2021	-	-
Meg22_1012_Bin_233_Lokiarchaeota	Meg22_1012_Bin_233_scaffold_2162_36_50	fff3040d2cfdd1f7c36a05ee84a2b09a	418	SUPERFAMILY	SSF50475	FMN-binding split barrel	24	276	2.47e-45	T	23-07-2021	-	-
Meg22_1012_Bin_233_Lokiarchaeota	Meg22_1012_Bin_233_scaffold_2162_36_50	fff3040d2cfdd1f7c36a05ee84a2b09a	418	TIGRFAM	TIGR00148	TIGR00148: decarboxylase, UbiD family	15	406	2.1e-104	T	23-07-2021	IPR002830	UbiD decarboxylyase family
Meg19_1012_Bin_504_Helarchaeota	Meg19_1012_Bin_504_scaffold_53697_120_10	ba75b288c1bef21d9363318e119c58f9	607	SUPERFAMILY	SSF52540	P-loop containing nucleoside triphosphate hydrolases	339	585	8.31e-85	T	23-07-2021	IPR027417	P-loop containing nucleoside triphosphate hydrolase
Meg19_1012_Bin_504_Helarchaeota	Meg19_1012_Bin_504_scaffold_53697_120_10	ba75b288c1bef21d9363318e119c58f9	607	Gene3D	G3DSA:3.40.50.300	-	346	597	7.5e-84	T	23-07-2021	-	-
Meg19_1012_Bin_504_Helarchaeota	Meg19_1012_Bin_504_scaffold_53697_120_10	ba75b288c1bef21d9363318e119c58f9	607	Gene3D	G3DSA:1.20.1560.10	-	7	336	7.6e-75	T	23-07-2021	IPR036640	ABC transporter type 1, transmembrane domain superfamily
Meg19_1012_Bin_504_Helarchaeota	Meg19_1012_Bin_504_scaffold_53697_120_10	ba75b288c1bef21d9363318e119c58f9	607	Pfam	PF00005	ABC transporter	367	515	1.2e-30	T	23-07-2021	IPR003439	ABC transporter-like
Meg19_1012_Bin_504_Helarchaeota	Meg19_1012_Bin_504_scaffold_53697_120_10	ba75b288c1bef21d9363318e119c58f9	607	PANTHER	PTHR24221:SF544	MULTIDRUG RESISTANCE-LIKE ATP-BINDING PROTEIN MDLB	27	585	1.5e-143	T	23-07-2021	-	-
Meg19_1012_Bin_504_Helarchaeota	Meg19_1012_Bin_504_scaffold_53697_120_10	ba75b288c1bef21d9363318e119c58f9	607	SUPERFAMILY	SSF90123	ABC transporter transmembrane region	19	334	1.96e-66	T	23-07-2021	IPR036640	ABC transporter type 1, transmembrane domain superfamily
Meg19_1012_Bin_504_Helarchaeota	Meg19_1012_Bin_504_scaffold_53697_120_10	ba75b288c1bef21d9363318e119c58f9	607	PANTHER	PTHR24221	ATP-BINDING CASSETTE SUB-FAMILY B	27	585	1.5e-143	T	23-07-2021	IPR039421	Type 1 protein exporter
Meg19_1012_Bin_504_Helarchaeota	Meg19_1012_Bin_504_scaffold_53697_120_10	ba75b288c1bef21d9363318e119c58f9	607	ProSiteProfiles	PS50929	ABC transporter integral membrane type-1 fused domain profile.	36	317	48.586	T	23-07-2021	IPR011527	ABC transporter type 1, transmembrane domain
Meg19_1012_Bin_504_Helarchaeota	Meg19_1012_Bin_504_scaffold_53697_120_10	ba75b288c1bef21d9363318e119c58f9	607	ProSitePatterns	PS00211	ABC transporters family signature.	487	501	-	T	23-07-2021	IPR017871	ABC transporter, conserved site
Meg19_1012_Bin_504_Helarchaeota	Meg19_1012_Bin_504_scaffold_53697_120_10	ba75b288c1bef21d9363318e119c58f9	607	ProSiteProfiles	PS50893	ATP-binding cassette, ABC transporter-type domain profile.	350	584	21.282	T	23-07-2021	IPR003439	ABC transporter-like
Meg19_1012_Bin_504_Helarchaeota	Meg19_1012_Bin_504_scaffold_53697_120_10	ba75b288c1bef21d9363318e119c58f9	607	SMART	SM00382	AAA_5	375	561	3e-14	T	23-07-2021	IPR003593	AAA+ ATPase domain
Meg19_1012_Bin_504_Helarchaeota	Meg19_1012_Bin_504_scaffold_53697_120_10	ba75b288c1bef21d9363318e119c58f9	607	Pfam	PF00664	ABC transporter transmembrane region	35	304	1.6e-35	T	23-07-2021	IPR011527	ABC transporter type 1, transmembrane domain
Meg19_1012_Bin_504_Helarchaeota	Meg19_1012_Bin_504_scaffold_53697_120_10	ba75b288c1bef21d9363318e119c58f9	607	CDD	cd07346	ABC_6TM_exporters	35	325	4.91939e-55	T	23-07-2021	-	-
Meg22_1012_Bin_233_Lokiarchaeota	Meg22_1012_Bin_233_scaffold_93_11_32	ba3a0a6a47266eac60323f86550bb3de	418	Pfam	PF14520	Helix-hairpin-helix domain	3	56	5.1e-06	T	23-07-2021	-	-
Meg22_1012_Bin_233_Lokiarchaeota	Meg22_1012_Bin_233_scaffold_93_11_32	ba3a0a6a47266eac60323f86550bb3de	418	Pfam	PF14520	Helix-hairpin-helix domain	362	411	8e-08	T	23-07-2021	-	-
Meg22_1012_Bin_233_Lokiarchaeota	Meg22_1012_Bin_233_scaffold_93_11_32	ba3a0a6a47266eac60323f86550bb3de	418	Gene3D	G3DSA:1.10.150.20	5' to 3' exonuclease	2	69	3.5e-13	T	23-07-2021	-	-
Meg22_1012_Bin_233_Lokiarchaeota	Meg22_1012_Bin_233_scaffold_93_11_32	ba3a0a6a47266eac60323f86550bb3de	418	SUPERFAMILY	SSF52540	P-loop containing nucleoside triphosphate hydrolases	74	312	7.89e-48	T	23-07-2021	IPR027417	P-loop containing nucleoside triphosphate hydrolase
Meg22_1012_Bin_233_Lokiarchaeota	Meg22_1012_Bin_233_scaffold_93_11_32	ba3a0a6a47266eac60323f86550bb3de	418	Gene3D	G3DSA:3.40.50.300	-	70	312	7.2e-67	T	23-07-2021	-	-
Meg22_1012_Bin_233_Lokiarchaeota	Meg22_1012_Bin_233_scaffold_93_11_32	ba3a0a6a47266eac60323f86550bb3de	418	Gene3D	G3DSA:1.10.150.20	5' to 3' exonuclease	361	418	1.6e-14	T	23-07-2021	-	-
Meg22_1012_Bin_233_Lokiarchaeota	Meg22_1012_Bin_233_scaffold_93_11_32	ba3a0a6a47266eac60323f86550bb3de	418	ProSiteProfiles	PS50162	RecA family profile 1.	73	244	39.834	T	23-07-2021	IPR020588	DNA recombination and repair protein RecA-like, ATP-binding domain
Meg22_1012_Bin_233_Lokiarchaeota	Meg22_1012_Bin_233_scaffold_93_11_32	ba3a0a6a47266eac60323f86550bb3de	418	SUPERFAMILY	SSF47794	Rad51 N-terminal domain-like	3	59	3.61e-10	T	23-07-2021	IPR010995	DNA repair Rad51/transcription factor NusA, alpha-helical
Meg22_1012_Bin_233_Lokiarchaeota	Meg22_1012_Bin_233_scaffold_93_11_32	ba3a0a6a47266eac60323f86550bb3de	418	CDD	cd01123	Rad51_DMC1_radA	77	310	3.24681e-95	T	23-07-2021	IPR033925	Rad51/DMC1/RadA
Meg22_1012_Bin_233_Lokiarchaeota	Meg22_1012_Bin_233_scaffold_93_11_32	ba3a0a6a47266eac60323f86550bb3de	418	SMART	SM00382	AAA_5	94	278	0.0044	T	23-07-2021	IPR003593	AAA+ ATPase domain
Meg22_1012_Bin_233_Lokiarchaeota	Meg22_1012_Bin_233_scaffold_93_11_32	ba3a0a6a47266eac60323f86550bb3de	418	PANTHER	PTHR22942	RECA/RAD51/RADA DNA STRAND-PAIRING FAMILY MEMBER	2	315	6.6e-98	T	23-07-2021	-	-
Meg22_1012_Bin_233_Lokiarchaeota	Meg22_1012_Bin_233_scaffold_93_11_32	ba3a0a6a47266eac60323f86550bb3de	418	SUPERFAMILY	SSF47794	Rad51 N-terminal domain-like	360	414	2.35e-07	T	23-07-2021	IPR010995	DNA repair Rad51/transcription factor NusA, alpha-helical
Meg22_1012_Bin_233_Lokiarchaeota	Meg22_1012_Bin_233_scaffold_93_11_32	ba3a0a6a47266eac60323f86550bb3de	418	Pfam	PF08423	Rad51	70	312	8.8e-73	T	23-07-2021	IPR013632	DNA recombination and repair protein Rad51-like, C-terminal
Meg19_1012_Bin_504_Helarchaeota	Meg19_1012_Bin_504_scaffold_401_3_69	87e4b75f01bf05fcf7d86d8c2a50c943	353	SUPERFAMILY	SSF53649	Alkaline phosphatase-like	4	338	6.25e-51	T	23-07-2021	IPR017850	Alkaline-phosphatase-like, core domain superfamily
Meg19_1012_Bin_504_Helarchaeota	Meg19_1012_Bin_504_scaffold_401_3_69	87e4b75f01bf05fcf7d86d8c2a50c943	353	Gene3D	G3DSA:3.40.720.10	Alkaline Phosphatase	1	349	1.1e-42	T	23-07-2021	IPR017850	Alkaline-phosphatase-like, core domain superfamily
Meg19_1012_Bin_504_Helarchaeota	Meg19_1012_Bin_504_scaffold_401_3_69	87e4b75f01bf05fcf7d86d8c2a50c943	353	PANTHER	PTHR10151	ECTONUCLEOTIDE PYROPHOSPHATASE/PHOSPHODIESTERASE	4	337	8.4e-23	T	23-07-2021	-	-
Meg19_1012_Bin_504_Helarchaeota	Meg19_1012_Bin_504_scaffold_401_3_69	87e4b75f01bf05fcf7d86d8c2a50c943	353	Pfam	PF01663	Type I phosphodiesterase / nucleotide pyrophosphatase	4	294	1.5e-27	T	23-07-2021	IPR002591	Type I phosphodiesterase/nucleotide pyrophosphatase/phosphate transferase
Meg19_1012_Bin_504_Helarchaeota	Meg19_1012_Bin_504_scaffold_401_3_69	87e4b75f01bf05fcf7d86d8c2a50c943	353	PANTHER	PTHR10151:SF103	ECTONUCLEOTIDE PYROPHOSPHATASE/PHOSPHODIESTERASE FAMILY MEMBER 5	4	337	8.4e-23	T	23-07-2021	-	-
Meg19_1012_Bin_504_Helarchaeota	Meg19_1012_Bin_504_scaffold_97639_140_1	65912f00a9c54a117a0522fd8a81e788	243	Pfam	PF01207	Dihydrouridine synthase (Dus)	2	197	5.8e-46	T	23-07-2021	IPR035587	DUS-like, FMN-binding domain
Meg19_1012_Bin_504_Helarchaeota	Meg19_1012_Bin_504_scaffold_97639_140_1	65912f00a9c54a117a0522fd8a81e788	243	Gene3D	G3DSA:3.20.20.70	Aldolase class I	1	168	1e-46	T	23-07-2021	IPR013785	Aldolase-type TIM barrel
Meg19_1012_Bin_504_Helarchaeota	Meg19_1012_Bin_504_scaffold_97639_140_1	65912f00a9c54a117a0522fd8a81e788	243	CDD	cd02801	DUS_like_FMN	1	170	7.66778e-57	T	23-07-2021	IPR035587	DUS-like, FMN-binding domain
Meg19_1012_Bin_504_Helarchaeota	Meg19_1012_Bin_504_scaffold_97639_140_1	65912f00a9c54a117a0522fd8a81e788	243	PANTHER	PTHR11082:SF25	TRNA-DIHYDROURIDINE SYNTHASE B	1	241	1.9e-48	T	23-07-2021	-	-
Meg19_1012_Bin_504_Helarchaeota	Meg19_1012_Bin_504_scaffold_97639_140_1	65912f00a9c54a117a0522fd8a81e788	243	PANTHER	PTHR11082	TRNA-DIHYDROURIDINE SYNTHASE	1	241	1.9e-48	T	23-07-2021	-	-
Meg19_1012_Bin_504_Helarchaeota	Meg19_1012_Bin_504_scaffold_97639_140_1	65912f00a9c54a117a0522fd8a81e788	243	SUPERFAMILY	SSF51395	FMN-linked oxidoreductases	3	201	1.03e-41	T	23-07-2021	-	-
Meg19_1012_Bin_504_Helarchaeota	Meg19_1012_Bin_504_scaffold_2274_29_32	92ed2d4a50b3d6c3210e87bbbe5c56af	272	PIRSF	PIRSF006648	DrrB	4	270	4.8e-38	T	23-07-2021	IPR000412	ABC-2 transporter
Meg19_1012_Bin_504_Helarchaeota	Meg19_1012_Bin_504_scaffold_2274_29_32	92ed2d4a50b3d6c3210e87bbbe5c56af	272	Pfam	PF01061	ABC-2 type transporter	23	236	1.6e-25	T	23-07-2021	IPR013525	ABC-2 type transporter
Meg19_1012_Bin_504_Helarchaeota	Meg19_1012_Bin_504_scaffold_2274_29_32	92ed2d4a50b3d6c3210e87bbbe5c56af	272	PRINTS	PR00164	ABC-2 type transport system membrane protein signature	194	213	2.8e-16	T	23-07-2021	IPR000412	ABC-2 transporter
Meg19_1012_Bin_504_Helarchaeota	Meg19_1012_Bin_504_scaffold_2274_29_32	92ed2d4a50b3d6c3210e87bbbe5c56af	272	PRINTS	PR00164	ABC-2 type transport system membrane protein signature	157	181	2.8e-16	T	23-07-2021	IPR000412	ABC-2 transporter
Meg19_1012_Bin_504_Helarchaeota	Meg19_1012_Bin_504_scaffold_2274_29_32	92ed2d4a50b3d6c3210e87bbbe5c56af	272	PRINTS	PR00164	ABC-2 type transport system membrane protein signature	214	233	2.8e-16	T	23-07-2021	IPR000412	ABC-2 transporter
Meg19_1012_Bin_504_Helarchaeota	Meg19_1012_Bin_504_scaffold_2274_29_32	92ed2d4a50b3d6c3210e87bbbe5c56af	272	PRINTS	PR00164	ABC-2 type transport system membrane protein signature	72	94	2.8e-16	T	23-07-2021	IPR000412	ABC-2 transporter
Meg19_1012_Bin_504_Helarchaeota	Meg19_1012_Bin_504_scaffold_2274_29_32	92ed2d4a50b3d6c3210e87bbbe5c56af	272	PANTHER	PTHR43077	TRANSPORT PERMEASE YVFS-RELATED	17	259	1.1e-31	T	23-07-2021	-	-
Meg19_1012_Bin_504_Helarchaeota	Meg19_1012_Bin_504_scaffold_2274_29_32	92ed2d4a50b3d6c3210e87bbbe5c56af	272	PANTHER	PTHR43077:SF9	TRANSPORT PERMEASE PROTEIN	17	259	1.1e-31	T	23-07-2021	-	-
Meg19_1012_Bin_504_Helarchaeota	Meg19_1012_Bin_504_scaffold_2274_29_32	92ed2d4a50b3d6c3210e87bbbe5c56af	272	ProSiteProfiles	PS51012	ABC transporter integral membrane type-2 domain profile.	38	269	39.771	T	23-07-2021	IPR000412	ABC-2 transporter
Meg22_1214_Bin_191_Lokiarchaeota	Meg22_1214_Bin_191_scaffold_1428_18_7	1f732d5fc3c989d202ad6d096d05901d	314	Gene3D	G3DSA:3.10.270.10	Urate Oxidase;	1	302	4.8e-60	T	23-07-2021	-	-
Meg22_1214_Bin_191_Lokiarchaeota	Meg22_1214_Bin_191_scaffold_1428_18_7	1f732d5fc3c989d202ad6d096d05901d	314	Pfam	PF02649	Type I GTP cyclohydrolase folE2	2	298	2.8e-61	T	23-07-2021	IPR003801	GTP cyclohydrolase FolE2/MptA
Meg22_1214_Bin_191_Lokiarchaeota	Meg22_1214_Bin_191_scaffold_1428_18_7	1f732d5fc3c989d202ad6d096d05901d	314	Coils	Coil	Coil	297	314	-	T	23-07-2021	-	-
Meg22_1214_Bin_191_Lokiarchaeota	Meg22_1214_Bin_191_scaffold_1428_18_7	1f732d5fc3c989d202ad6d096d05901d	314	Hamap	MF_01527_A	GTP cyclohydrolase FolE2 [folE2].	1	302	27.7185	T	23-07-2021	IPR022840	GTP cyclohydrolase MptA
Meg22_1214_Bin_191_Lokiarchaeota	Meg22_1214_Bin_191_scaffold_1428_18_7	1f732d5fc3c989d202ad6d096d05901d	314	PANTHER	PTHR36445	GTP CYCLOHYDROLASE MPTA	2	308	5.7e-56	T	23-07-2021	IPR003801	GTP cyclohydrolase FolE2/MptA
Meg22_1214_Bin_191_Lokiarchaeota	Meg22_1214_Bin_191_scaffold_1428_18_7	1f732d5fc3c989d202ad6d096d05901d	314	TIGRFAM	TIGR00294	TIGR00294: GTP cyclohydrolase	2	312	2.5e-62	T	23-07-2021	IPR003801	GTP cyclohydrolase FolE2/MptA
Meg22_1416_Bin_151_Lokiarchaeota	Meg22_1416_Bin_151_scaffold_3197_60_7	1f732d5fc3c989d202ad6d096d05901d	314	Gene3D	G3DSA:3.10.270.10	Urate Oxidase;	1	302	4.8e-60	T	23-07-2021	-	-
Meg22_1416_Bin_151_Lokiarchaeota	Meg22_1416_Bin_151_scaffold_3197_60_7	1f732d5fc3c989d202ad6d096d05901d	314	Pfam	PF02649	Type I GTP cyclohydrolase folE2	2	298	2.8e-61	T	23-07-2021	IPR003801	GTP cyclohydrolase FolE2/MptA
Meg22_1416_Bin_151_Lokiarchaeota	Meg22_1416_Bin_151_scaffold_3197_60_7	1f732d5fc3c989d202ad6d096d05901d	314	Coils	Coil	Coil	297	314	-	T	23-07-2021	-	-
Meg22_1416_Bin_151_Lokiarchaeota	Meg22_1416_Bin_151_scaffold_3197_60_7	1f732d5fc3c989d202ad6d096d05901d	314	Hamap	MF_01527_A	GTP cyclohydrolase FolE2 [folE2].	1	302	27.7185	T	23-07-2021	IPR022840	GTP cyclohydrolase MptA
Meg22_1416_Bin_151_Lokiarchaeota	Meg22_1416_Bin_151_scaffold_3197_60_7	1f732d5fc3c989d202ad6d096d05901d	314	PANTHER	PTHR36445	GTP CYCLOHYDROLASE MPTA	2	308	5.7e-56	T	23-07-2021	IPR003801	GTP cyclohydrolase FolE2/MptA
Meg22_1416_Bin_151_Lokiarchaeota	Meg22_1416_Bin_151_scaffold_3197_60_7	1f732d5fc3c989d202ad6d096d05901d	314	TIGRFAM	TIGR00294	TIGR00294: GTP cyclohydrolase	2	312	2.5e-62	T	23-07-2021	IPR003801	GTP cyclohydrolase FolE2/MptA
Meg22_1012_Bin_233_Lokiarchaeota	Meg22_1012_Bin_233_scaffold_96_12_68	1f732d5fc3c989d202ad6d096d05901d	314	Gene3D	G3DSA:3.10.270.10	Urate Oxidase;	1	302	4.8e-60	T	23-07-2021	-	-
Meg22_1012_Bin_233_Lokiarchaeota	Meg22_1012_Bin_233_scaffold_96_12_68	1f732d5fc3c989d202ad6d096d05901d	314	Pfam	PF02649	Type I GTP cyclohydrolase folE2	2	298	2.8e-61	T	23-07-2021	IPR003801	GTP cyclohydrolase FolE2/MptA
Meg22_1012_Bin_233_Lokiarchaeota	Meg22_1012_Bin_233_scaffold_96_12_68	1f732d5fc3c989d202ad6d096d05901d	314	Coils	Coil	Coil	297	314	-	T	23-07-2021	-	-
Meg22_1012_Bin_233_Lokiarchaeota	Meg22_1012_Bin_233_scaffold_96_12_68	1f732d5fc3c989d202ad6d096d05901d	314	Hamap	MF_01527_A	GTP cyclohydrolase FolE2 [folE2].	1	302	27.7185	T	23-07-2021	IPR022840	GTP cyclohydrolase MptA
Meg22_1012_Bin_233_Lokiarchaeota	Meg22_1012_Bin_233_scaffold_96_12_68	1f732d5fc3c989d202ad6d096d05901d	314	PANTHER	PTHR36445	GTP CYCLOHYDROLASE MPTA	2	308	5.7e-56	T	23-07-2021	IPR003801	GTP cyclohydrolase FolE2/MptA
Meg22_1012_Bin_233_Lokiarchaeota	Meg22_1012_Bin_233_scaffold_96_12_68	1f732d5fc3c989d202ad6d096d05901d	314	TIGRFAM	TIGR00294	TIGR00294: GTP cyclohydrolase	2	312	2.5e-62	T	23-07-2021	IPR003801	GTP cyclohydrolase FolE2/MptA
Meg19_1012_Bin_504_Helarchaeota	Meg19_1012_Bin_504_scaffold_4290_46_9	e66cb70f6b8dabcfd6c0171157b4413d	367	Gene3D	G3DSA:3.40.50.12780	-	12	325	4.1e-07	T	23-07-2021	IPR042099	AMP-dependent synthetase-like superfamily
Meg22_1416_Bin_151_Lokiarchaeota	Meg22_1416_Bin_151_scaffold_3530_64_14	5d681d9f75f4e10f039029d186bd0e5e	52	Gene3D	G3DSA:3.30.1120.10	-	1	45	6.7e-07	T	23-07-2021	-	-
Meg22_1214_Bin_191_Lokiarchaeota	Meg22_1214_Bin_191_scaffold_3549_39_33	5d681d9f75f4e10f039029d186bd0e5e	52	Gene3D	G3DSA:3.30.1120.10	-	1	45	6.7e-07	T	23-07-2021	-	-
Meg22_1012_Bin_233_Lokiarchaeota	Meg22_1012_Bin_233_scaffold_1172_29_15	5d681d9f75f4e10f039029d186bd0e5e	52	Gene3D	G3DSA:3.30.1120.10	-	1	45	6.7e-07	T	23-07-2021	-	-
Meg22_1214_Bin_191_Lokiarchaeota	Meg22_1214_Bin_191_scaffold_7521_57_4	f766bf140aa377851bd28e97ea7cf7a1	649	SUPERFAMILY	SSF52374	Nucleotidylyl transferase	2	325	2.95e-93	T	23-07-2021	-	-
Meg22_1214_Bin_191_Lokiarchaeota	Meg22_1214_Bin_191_scaffold_7521_57_4	f766bf140aa377851bd28e97ea7cf7a1	649	Coils	Coil	Coil	501	521	-	T	23-07-2021	-	-
Meg22_1214_Bin_191_Lokiarchaeota	Meg22_1214_Bin_191_scaffold_7521_57_4	f766bf140aa377851bd28e97ea7cf7a1	649	Gene3D	G3DSA:1.20.120.640	-	579	649	4.1e-06	T	23-07-2021	-	-
Meg22_1214_Bin_191_Lokiarchaeota	Meg22_1214_Bin_191_scaffold_7521_57_4	f766bf140aa377851bd28e97ea7cf7a1	649	Gene3D	G3DSA:1.20.120.640	-	318	478	1.8e-12	T	23-07-2021	-	-
Meg22_1214_Bin_191_Lokiarchaeota	Meg22_1214_Bin_191_scaffold_7521_57_4	f766bf140aa377851bd28e97ea7cf7a1	649	SUPERFAMILY	SSF47323	Anticodon-binding domain of a subclass of class I aminoacyl-tRNA synthetases	604	648	5.62e-08	T	23-07-2021	IPR009080	Aminoacyl-tRNA synthetase, class Ia, anticodon-binding
Meg22_1214_Bin_191_Lokiarchaeota	Meg22_1214_Bin_191_scaffold_7521_57_4	f766bf140aa377851bd28e97ea7cf7a1	649	Gene3D	G3DSA:3.40.50.620	HUPs	1	316	3.6e-129	T	23-07-2021	IPR014729	Rossmann-like alpha/beta/alpha sandwich fold
Meg22_1214_Bin_191_Lokiarchaeota	Meg22_1214_Bin_191_scaffold_7521_57_4	f766bf140aa377851bd28e97ea7cf7a1	649	SMART	SM00840	dalr_2_4	363	429	4.9e-09	T	23-07-2021	IPR015273	Cysteinyl-tRNA synthetase, class Ia, DALR
Meg22_1214_Bin_191_Lokiarchaeota	Meg22_1214_Bin_191_scaffold_7521_57_4	f766bf140aa377851bd28e97ea7cf7a1	649	Pfam	PF09190	DALR domain	363	423	4.7e-09	T	23-07-2021	IPR015273	Cysteinyl-tRNA synthetase, class Ia, DALR
Meg22_1214_Bin_191_Lokiarchaeota	Meg22_1214_Bin_191_scaffold_7521_57_4	f766bf140aa377851bd28e97ea7cf7a1	649	TIGRFAM	TIGR00435	cysS: cysteine--tRNA ligase	1	442	2.7e-147	T	23-07-2021	IPR015803	Cysteine-tRNA ligase
Meg22_1214_Bin_191_Lokiarchaeota	Meg22_1214_Bin_191_scaffold_7521_57_4	f766bf140aa377851bd28e97ea7cf7a1	649	PANTHER	PTHR10890	CYSTEINYL-TRNA SYNTHETASE	1	648	3.1e-150	T	23-07-2021	IPR024909	Cysteinyl-tRNA synthetase/mycothiol ligase
Meg22_1214_Bin_191_Lokiarchaeota	Meg22_1214_Bin_191_scaffold_7521_57_4	f766bf140aa377851bd28e97ea7cf7a1	649	Coils	Coil	Coil	313	340	-	T	23-07-2021	-	-
Meg22_1214_Bin_191_Lokiarchaeota	Meg22_1214_Bin_191_scaffold_7521_57_4	f766bf140aa377851bd28e97ea7cf7a1	649	Hamap	MF_00041	Cysteine--tRNA ligase [cysS].	1	649	33.4607	T	23-07-2021	IPR015803	Cysteine-tRNA ligase
Meg22_1214_Bin_191_Lokiarchaeota	Meg22_1214_Bin_191_scaffold_7521_57_4	f766bf140aa377851bd28e97ea7cf7a1	649	Coils	Coil	Coil	74	94	-	T	23-07-2021	-	-
Meg22_1214_Bin_191_Lokiarchaeota	Meg22_1214_Bin_191_scaffold_7521_57_4	f766bf140aa377851bd28e97ea7cf7a1	649	Coils	Coil	Coil	343	370	-	T	23-07-2021	-	-
Meg22_1214_Bin_191_Lokiarchaeota	Meg22_1214_Bin_191_scaffold_7521_57_4	f766bf140aa377851bd28e97ea7cf7a1	649	Pfam	PF01406	tRNA synthetases class I (C) catalytic domain	15	324	1.2e-122	T	23-07-2021	IPR032678	tRNA synthetases class I, catalytic domain
Meg22_1214_Bin_191_Lokiarchaeota	Meg22_1214_Bin_191_scaffold_7521_57_4	f766bf140aa377851bd28e97ea7cf7a1	649	CDD	cd00672	CysRS_core	2	316	7.59783e-113	T	23-07-2021	IPR032678	tRNA synthetases class I, catalytic domain
Meg22_1214_Bin_191_Lokiarchaeota	Meg22_1214_Bin_191_scaffold_7521_57_4	f766bf140aa377851bd28e97ea7cf7a1	649	SUPERFAMILY	SSF47323	Anticodon-binding domain of a subclass of class I aminoacyl-tRNA synthetases	353	474	1.44e-09	T	23-07-2021	IPR009080	Aminoacyl-tRNA synthetase, class Ia, anticodon-binding
Meg22_1214_Bin_191_Lokiarchaeota	Meg22_1214_Bin_191_scaffold_7521_57_4	f766bf140aa377851bd28e97ea7cf7a1	649	Coils	Coil	Coil	154	174	-	T	23-07-2021	-	-
Meg22_1214_Bin_191_Lokiarchaeota	Meg22_1214_Bin_191_scaffold_7521_57_4	f766bf140aa377851bd28e97ea7cf7a1	649	PRINTS	PR00983	Cysteinyl-tRNA synthetase signature	60	69	3e-27	T	23-07-2021	IPR024909	Cysteinyl-tRNA synthetase/mycothiol ligase
Meg22_1214_Bin_191_Lokiarchaeota	Meg22_1214_Bin_191_scaffold_7521_57_4	f766bf140aa377851bd28e97ea7cf7a1	649	PRINTS	PR00983	Cysteinyl-tRNA synthetase signature	233	254	3e-27	T	23-07-2021	IPR024909	Cysteinyl-tRNA synthetase/mycothiol ligase
Meg22_1214_Bin_191_Lokiarchaeota	Meg22_1214_Bin_191_scaffold_7521_57_4	f766bf140aa377851bd28e97ea7cf7a1	649	PRINTS	PR00983	Cysteinyl-tRNA synthetase signature	202	220	3e-27	T	23-07-2021	IPR024909	Cysteinyl-tRNA synthetase/mycothiol ligase
Meg22_1214_Bin_191_Lokiarchaeota	Meg22_1214_Bin_191_scaffold_7521_57_4	f766bf140aa377851bd28e97ea7cf7a1	649	PRINTS	PR00983	Cysteinyl-tRNA synthetase signature	24	35	3e-27	T	23-07-2021	IPR024909	Cysteinyl-tRNA synthetase/mycothiol ligase
Meg22_1416_Bin_151_Lokiarchaeota	Meg22_1416_Bin_151_scaffold_1034_27_8	f766bf140aa377851bd28e97ea7cf7a1	649	SUPERFAMILY	SSF52374	Nucleotidylyl transferase	2	325	2.95e-93	T	23-07-2021	-	-
Meg22_1416_Bin_151_Lokiarchaeota	Meg22_1416_Bin_151_scaffold_1034_27_8	f766bf140aa377851bd28e97ea7cf7a1	649	Coils	Coil	Coil	501	521	-	T	23-07-2021	-	-
Meg22_1416_Bin_151_Lokiarchaeota	Meg22_1416_Bin_151_scaffold_1034_27_8	f766bf140aa377851bd28e97ea7cf7a1	649	Gene3D	G3DSA:1.20.120.640	-	579	649	4.1e-06	T	23-07-2021	-	-
Meg22_1416_Bin_151_Lokiarchaeota	Meg22_1416_Bin_151_scaffold_1034_27_8	f766bf140aa377851bd28e97ea7cf7a1	649	Gene3D	G3DSA:1.20.120.640	-	318	478	1.8e-12	T	23-07-2021	-	-
Meg22_1416_Bin_151_Lokiarchaeota	Meg22_1416_Bin_151_scaffold_1034_27_8	f766bf140aa377851bd28e97ea7cf7a1	649	SUPERFAMILY	SSF47323	Anticodon-binding domain of a subclass of class I aminoacyl-tRNA synthetases	604	648	5.62e-08	T	23-07-2021	IPR009080	Aminoacyl-tRNA synthetase, class Ia, anticodon-binding
Meg22_1416_Bin_151_Lokiarchaeota	Meg22_1416_Bin_151_scaffold_1034_27_8	f766bf140aa377851bd28e97ea7cf7a1	649	Gene3D	G3DSA:3.40.50.620	HUPs	1	316	3.6e-129	T	23-07-2021	IPR014729	Rossmann-like alpha/beta/alpha sandwich fold
Meg22_1416_Bin_151_Lokiarchaeota	Meg22_1416_Bin_151_scaffold_1034_27_8	f766bf140aa377851bd28e97ea7cf7a1	649	SMART	SM00840	dalr_2_4	363	429	4.9e-09	T	23-07-2021	IPR015273	Cysteinyl-tRNA synthetase, class Ia, DALR
Meg22_1416_Bin_151_Lokiarchaeota	Meg22_1416_Bin_151_scaffold_1034_27_8	f766bf140aa377851bd28e97ea7cf7a1	649	Pfam	PF09190	DALR domain	363	423	4.7e-09	T	23-07-2021	IPR015273	Cysteinyl-tRNA synthetase, class Ia, DALR
Meg22_1416_Bin_151_Lokiarchaeota	Meg22_1416_Bin_151_scaffold_1034_27_8	f766bf140aa377851bd28e97ea7cf7a1	649	TIGRFAM	TIGR00435	cysS: cysteine--tRNA ligase	1	442	2.7e-147	T	23-07-2021	IPR015803	Cysteine-tRNA ligase
Meg22_1416_Bin_151_Lokiarchaeota	Meg22_1416_Bin_151_scaffold_1034_27_8	f766bf140aa377851bd28e97ea7cf7a1	649	PANTHER	PTHR10890	CYSTEINYL-TRNA SYNTHETASE	1	648	3.1e-150	T	23-07-2021	IPR024909	Cysteinyl-tRNA synthetase/mycothiol ligase
Meg22_1416_Bin_151_Lokiarchaeota	Meg22_1416_Bin_151_scaffold_1034_27_8	f766bf140aa377851bd28e97ea7cf7a1	649	Coils	Coil	Coil	313	340	-	T	23-07-2021	-	-
Meg22_1416_Bin_151_Lokiarchaeota	Meg22_1416_Bin_151_scaffold_1034_27_8	f766bf140aa377851bd28e97ea7cf7a1	649	Hamap	MF_00041	Cysteine--tRNA ligase [cysS].	1	649	33.4607	T	23-07-2021	IPR015803	Cysteine-tRNA ligase
Meg22_1416_Bin_151_Lokiarchaeota	Meg22_1416_Bin_151_scaffold_1034_27_8	f766bf140aa377851bd28e97ea7cf7a1	649	Coils	Coil	Coil	74	94	-	T	23-07-2021	-	-
Meg22_1416_Bin_151_Lokiarchaeota	Meg22_1416_Bin_151_scaffold_1034_27_8	f766bf140aa377851bd28e97ea7cf7a1	649	Coils	Coil	Coil	343	370	-	T	23-07-2021	-	-
Meg22_1416_Bin_151_Lokiarchaeota	Meg22_1416_Bin_151_scaffold_1034_27_8	f766bf140aa377851bd28e97ea7cf7a1	649	Pfam	PF01406	tRNA synthetases class I (C) catalytic domain	15	324	1.2e-122	T	23-07-2021	IPR032678	tRNA synthetases class I, catalytic domain
Meg22_1416_Bin_151_Lokiarchaeota	Meg22_1416_Bin_151_scaffold_1034_27_8	f766bf140aa377851bd28e97ea7cf7a1	649	CDD	cd00672	CysRS_core	2	316	7.59783e-113	T	23-07-2021	IPR032678	tRNA synthetases class I, catalytic domain
Meg22_1416_Bin_151_Lokiarchaeota	Meg22_1416_Bin_151_scaffold_1034_27_8	f766bf140aa377851bd28e97ea7cf7a1	649	SUPERFAMILY	SSF47323	Anticodon-binding domain of a subclass of class I aminoacyl-tRNA synthetases	353	474	1.44e-09	T	23-07-2021	IPR009080	Aminoacyl-tRNA synthetase, class Ia, anticodon-binding
Meg22_1416_Bin_151_Lokiarchaeota	Meg22_1416_Bin_151_scaffold_1034_27_8	f766bf140aa377851bd28e97ea7cf7a1	649	Coils	Coil	Coil	154	174	-	T	23-07-2021	-	-
Meg22_1416_Bin_151_Lokiarchaeota	Meg22_1416_Bin_151_scaffold_1034_27_8	f766bf140aa377851bd28e97ea7cf7a1	649	PRINTS	PR00983	Cysteinyl-tRNA synthetase signature	60	69	3e-27	T	23-07-2021	IPR024909	Cysteinyl-tRNA synthetase/mycothiol ligase
Meg22_1416_Bin_151_Lokiarchaeota	Meg22_1416_Bin_151_scaffold_1034_27_8	f766bf140aa377851bd28e97ea7cf7a1	649	PRINTS	PR00983	Cysteinyl-tRNA synthetase signature	233	254	3e-27	T	23-07-2021	IPR024909	Cysteinyl-tRNA synthetase/mycothiol ligase
Meg22_1416_Bin_151_Lokiarchaeota	Meg22_1416_Bin_151_scaffold_1034_27_8	f766bf140aa377851bd28e97ea7cf7a1	649	PRINTS	PR00983	Cysteinyl-tRNA synthetase signature	202	220	3e-27	T	23-07-2021	IPR024909	Cysteinyl-tRNA synthetase/mycothiol ligase
Meg22_1416_Bin_151_Lokiarchaeota	Meg22_1416_Bin_151_scaffold_1034_27_8	f766bf140aa377851bd28e97ea7cf7a1	649	PRINTS	PR00983	Cysteinyl-tRNA synthetase signature	24	35	3e-27	T	23-07-2021	IPR024909	Cysteinyl-tRNA synthetase/mycothiol ligase
Meg22_1012_Bin_233_Lokiarchaeota	Meg22_1012_Bin_233_scaffold_1758_31_4	f766bf140aa377851bd28e97ea7cf7a1	649	SUPERFAMILY	SSF52374	Nucleotidylyl transferase	2	325	2.95e-93	T	23-07-2021	-	-
Meg22_1012_Bin_233_Lokiarchaeota	Meg22_1012_Bin_233_scaffold_1758_31_4	f766bf140aa377851bd28e97ea7cf7a1	649	Coils	Coil	Coil	501	521	-	T	23-07-2021	-	-
Meg22_1012_Bin_233_Lokiarchaeota	Meg22_1012_Bin_233_scaffold_1758_31_4	f766bf140aa377851bd28e97ea7cf7a1	649	Gene3D	G3DSA:1.20.120.640	-	579	649	4.1e-06	T	23-07-2021	-	-
Meg22_1012_Bin_233_Lokiarchaeota	Meg22_1012_Bin_233_scaffold_1758_31_4	f766bf140aa377851bd28e97ea7cf7a1	649	Gene3D	G3DSA:1.20.120.640	-	318	478	1.8e-12	T	23-07-2021	-	-
Meg22_1012_Bin_233_Lokiarchaeota	Meg22_1012_Bin_233_scaffold_1758_31_4	f766bf140aa377851bd28e97ea7cf7a1	649	SUPERFAMILY	SSF47323	Anticodon-binding domain of a subclass of class I aminoacyl-tRNA synthetases	604	648	5.62e-08	T	23-07-2021	IPR009080	Aminoacyl-tRNA synthetase, class Ia, anticodon-binding
Meg22_1012_Bin_233_Lokiarchaeota	Meg22_1012_Bin_233_scaffold_1758_31_4	f766bf140aa377851bd28e97ea7cf7a1	649	Gene3D	G3DSA:3.40.50.620	HUPs	1	316	3.6e-129	T	23-07-2021	IPR014729	Rossmann-like alpha/beta/alpha sandwich fold
Meg22_1012_Bin_233_Lokiarchaeota	Meg22_1012_Bin_233_scaffold_1758_31_4	f766bf140aa377851bd28e97ea7cf7a1	649	SMART	SM00840	dalr_2_4	363	429	4.9e-09	T	23-07-2021	IPR015273	Cysteinyl-tRNA synthetase, class Ia, DALR
Meg22_1012_Bin_233_Lokiarchaeota	Meg22_1012_Bin_233_scaffold_1758_31_4	f766bf140aa377851bd28e97ea7cf7a1	649	Pfam	PF09190	DALR domain	363	423	4.7e-09	T	23-07-2021	IPR015273	Cysteinyl-tRNA synthetase, class Ia, DALR
Meg22_1012_Bin_233_Lokiarchaeota	Meg22_1012_Bin_233_scaffold_1758_31_4	f766bf140aa377851bd28e97ea7cf7a1	649	TIGRFAM	TIGR00435	cysS: cysteine--tRNA ligase	1	442	2.7e-147	T	23-07-2021	IPR015803	Cysteine-tRNA ligase
Meg22_1012_Bin_233_Lokiarchaeota	Meg22_1012_Bin_233_scaffold_1758_31_4	f766bf140aa377851bd28e97ea7cf7a1	649	PANTHER	PTHR10890	CYSTEINYL-TRNA SYNTHETASE	1	648	3.1e-150	T	23-07-2021	IPR024909	Cysteinyl-tRNA synthetase/mycothiol ligase
Meg22_1012_Bin_233_Lokiarchaeota	Meg22_1012_Bin_233_scaffold_1758_31_4	f766bf140aa377851bd28e97ea7cf7a1	649	Coils	Coil	Coil	313	340	-	T	23-07-2021	-	-
Meg22_1012_Bin_233_Lokiarchaeota	Meg22_1012_Bin_233_scaffold_1758_31_4	f766bf140aa377851bd28e97ea7cf7a1	649	Hamap	MF_00041	Cysteine--tRNA ligase [cysS].	1	649	33.4607	T	23-07-2021	IPR015803	Cysteine-tRNA ligase
Meg22_1012_Bin_233_Lokiarchaeota	Meg22_1012_Bin_233_scaffold_1758_31_4	f766bf140aa377851bd28e97ea7cf7a1	649	Coils	Coil	Coil	74	94	-	T	23-07-2021	-	-
Meg22_1012_Bin_233_Lokiarchaeota	Meg22_1012_Bin_233_scaffold_1758_31_4	f766bf140aa377851bd28e97ea7cf7a1	649	Coils	Coil	Coil	343	370	-	T	23-07-2021	-	-
Meg22_1012_Bin_233_Lokiarchaeota	Meg22_1012_Bin_233_scaffold_1758_31_4	f766bf140aa377851bd28e97ea7cf7a1	649	Pfam	PF01406	tRNA synthetases class I (C) catalytic domain	15	324	1.2e-122	T	23-07-2021	IPR032678	tRNA synthetases class I, catalytic domain
Meg22_1012_Bin_233_Lokiarchaeota	Meg22_1012_Bin_233_scaffold_1758_31_4	f766bf140aa377851bd28e97ea7cf7a1	649	CDD	cd00672	CysRS_core	2	316	7.59783e-113	T	23-07-2021	IPR032678	tRNA synthetases class I, catalytic domain
Meg22_1012_Bin_233_Lokiarchaeota	Meg22_1012_Bin_233_scaffold_1758_31_4	f766bf140aa377851bd28e97ea7cf7a1	649	SUPERFAMILY	SSF47323	Anticodon-binding domain of a subclass of class I aminoacyl-tRNA synthetases	353	474	1.44e-09	T	23-07-2021	IPR009080	Aminoacyl-tRNA synthetase, class Ia, anticodon-binding
Meg22_1012_Bin_233_Lokiarchaeota	Meg22_1012_Bin_233_scaffold_1758_31_4	f766bf140aa377851bd28e97ea7cf7a1	649	Coils	Coil	Coil	154	174	-	T	23-07-2021	-	-
Meg22_1012_Bin_233_Lokiarchaeota	Meg22_1012_Bin_233_scaffold_1758_31_4	f766bf140aa377851bd28e97ea7cf7a1	649	PRINTS	PR00983	Cysteinyl-tRNA synthetase signature	60	69	3e-27	T	23-07-2021	IPR024909	Cysteinyl-tRNA synthetase/mycothiol ligase
Meg22_1012_Bin_233_Lokiarchaeota	Meg22_1012_Bin_233_scaffold_1758_31_4	f766bf140aa377851bd28e97ea7cf7a1	649	PRINTS	PR00983	Cysteinyl-tRNA synthetase signature	233	254	3e-27	T	23-07-2021	IPR024909	Cysteinyl-tRNA synthetase/mycothiol ligase
Meg22_1012_Bin_233_Lokiarchaeota	Meg22_1012_Bin_233_scaffold_1758_31_4	f766bf140aa377851bd28e97ea7cf7a1	649	PRINTS	PR00983	Cysteinyl-tRNA synthetase signature	202	220	3e-27	T	23-07-2021	IPR024909	Cysteinyl-tRNA synthetase/mycothiol ligase
Meg22_1012_Bin_233_Lokiarchaeota	Meg22_1012_Bin_233_scaffold_1758_31_4	f766bf140aa377851bd28e97ea7cf7a1	649	PRINTS	PR00983	Cysteinyl-tRNA synthetase signature	24	35	3e-27	T	23-07-2021	IPR024909	Cysteinyl-tRNA synthetase/mycothiol ligase
Meg22_1012_Bin_233_Lokiarchaeota	Meg22_1012_Bin_233_scaffold_23_6_99	f26993f83fa4931bd3c7c46cac4672de	85	SUPERFAMILY	SSF82771	GIY-YIG endonuclease	11	74	3.66e-08	T	23-07-2021	IPR035901	GIY-YIG endonuclease superfamily
Meg22_1012_Bin_233_Lokiarchaeota	Meg22_1012_Bin_233_scaffold_23_6_99	f26993f83fa4931bd3c7c46cac4672de	85	Pfam	PF01541	GIY-YIG catalytic domain	7	74	1.5e-09	T	23-07-2021	IPR000305	GIY-YIG endonuclease
Meg22_1012_Bin_233_Lokiarchaeota	Meg22_1012_Bin_233_scaffold_23_6_99	f26993f83fa4931bd3c7c46cac4672de	85	ProSiteProfiles	PS50164	GIY-YIG domain profile.	1	77	13.577	T	23-07-2021	IPR000305	GIY-YIG endonuclease
Meg22_1012_Bin_233_Lokiarchaeota	Meg22_1012_Bin_233_scaffold_23_6_99	f26993f83fa4931bd3c7c46cac4672de	85	PANTHER	PTHR34477:SF1	UPF0213 PROTEIN YHBQ	11	81	7.7e-16	T	23-07-2021	-	-
Meg22_1012_Bin_233_Lokiarchaeota	Meg22_1012_Bin_233_scaffold_23_6_99	f26993f83fa4931bd3c7c46cac4672de	85	Gene3D	G3DSA:3.40.1440.10	-	1	85	1.3e-21	T	23-07-2021	IPR035901	GIY-YIG endonuclease superfamily
Meg22_1012_Bin_233_Lokiarchaeota	Meg22_1012_Bin_233_scaffold_23_6_99	f26993f83fa4931bd3c7c46cac4672de	85	PANTHER	PTHR34477	UPF0213 PROTEIN YHBQ	11	81	7.7e-16	T	23-07-2021	-	-
Meg22_1214_Bin_191_Lokiarchaeota	Meg22_1214_Bin_191_scaffold_750_11_98	f26993f83fa4931bd3c7c46cac4672de	85	SUPERFAMILY	SSF82771	GIY-YIG endonuclease	11	74	3.66e-08	T	23-07-2021	IPR035901	GIY-YIG endonuclease superfamily
Meg22_1214_Bin_191_Lokiarchaeota	Meg22_1214_Bin_191_scaffold_750_11_98	f26993f83fa4931bd3c7c46cac4672de	85	Pfam	PF01541	GIY-YIG catalytic domain	7	74	1.5e-09	T	23-07-2021	IPR000305	GIY-YIG endonuclease
Meg22_1214_Bin_191_Lokiarchaeota	Meg22_1214_Bin_191_scaffold_750_11_98	f26993f83fa4931bd3c7c46cac4672de	85	ProSiteProfiles	PS50164	GIY-YIG domain profile.	1	77	13.577	T	23-07-2021	IPR000305	GIY-YIG endonuclease
Meg22_1214_Bin_191_Lokiarchaeota	Meg22_1214_Bin_191_scaffold_750_11_98	f26993f83fa4931bd3c7c46cac4672de	85	PANTHER	PTHR34477:SF1	UPF0213 PROTEIN YHBQ	11	81	7.7e-16	T	23-07-2021	-	-
Meg22_1214_Bin_191_Lokiarchaeota	Meg22_1214_Bin_191_scaffold_750_11_98	f26993f83fa4931bd3c7c46cac4672de	85	Gene3D	G3DSA:3.40.1440.10	-	1	85	1.3e-21	T	23-07-2021	IPR035901	GIY-YIG endonuclease superfamily
Meg22_1214_Bin_191_Lokiarchaeota	Meg22_1214_Bin_191_scaffold_750_11_98	f26993f83fa4931bd3c7c46cac4672de	85	PANTHER	PTHR34477	UPF0213 PROTEIN YHBQ	11	81	7.7e-16	T	23-07-2021	-	-
Meg22_1416_Bin_151_Lokiarchaeota	Meg22_1416_Bin_151_scaffold_235_5_67	f26993f83fa4931bd3c7c46cac4672de	85	SUPERFAMILY	SSF82771	GIY-YIG endonuclease	11	74	3.66e-08	T	23-07-2021	IPR035901	GIY-YIG endonuclease superfamily
Meg22_1416_Bin_151_Lokiarchaeota	Meg22_1416_Bin_151_scaffold_235_5_67	f26993f83fa4931bd3c7c46cac4672de	85	Pfam	PF01541	GIY-YIG catalytic domain	7	74	1.5e-09	T	23-07-2021	IPR000305	GIY-YIG endonuclease
Meg22_1416_Bin_151_Lokiarchaeota	Meg22_1416_Bin_151_scaffold_235_5_67	f26993f83fa4931bd3c7c46cac4672de	85	ProSiteProfiles	PS50164	GIY-YIG domain profile.	1	77	13.577	T	23-07-2021	IPR000305	GIY-YIG endonuclease
Meg22_1416_Bin_151_Lokiarchaeota	Meg22_1416_Bin_151_scaffold_235_5_67	f26993f83fa4931bd3c7c46cac4672de	85	PANTHER	PTHR34477:SF1	UPF0213 PROTEIN YHBQ	11	81	7.7e-16	T	23-07-2021	-	-
Meg22_1416_Bin_151_Lokiarchaeota	Meg22_1416_Bin_151_scaffold_235_5_67	f26993f83fa4931bd3c7c46cac4672de	85	Gene3D	G3DSA:3.40.1440.10	-	1	85	1.3e-21	T	23-07-2021	IPR035901	GIY-YIG endonuclease superfamily
Meg22_1416_Bin_151_Lokiarchaeota	Meg22_1416_Bin_151_scaffold_235_5_67	f26993f83fa4931bd3c7c46cac4672de	85	PANTHER	PTHR34477	UPF0213 PROTEIN YHBQ	11	81	7.7e-16	T	23-07-2021	-	-
Meg19_1012_Bin_504_Helarchaeota	Meg19_1012_Bin_504_scaffold_6720_56_23	bf646820eb20bfdd481a38743b9b1234	546	Pfam	PF13589	Histidine kinase-, DNA gyrase B-, and HSP90-like ATPase	31	150	9.2e-06	T	23-07-2021	-	-
Meg19_1012_Bin_504_Helarchaeota	Meg19_1012_Bin_504_scaffold_6720_56_23	bf646820eb20bfdd481a38743b9b1234	546	Gene3D	G3DSA:3.30.565.10	-	2	199	1.2e-20	T	23-07-2021	IPR036890	Histidine kinase/HSP90-like ATPase superfamily
Meg19_1012_Bin_504_Helarchaeota	Meg19_1012_Bin_504_scaffold_6720_56_23	bf646820eb20bfdd481a38743b9b1234	546	SUPERFAMILY	SSF55874	ATPase domain of HSP90 chaperone/DNA topoisomerase II/histidine kinase	2	204	1.13e-23	T	23-07-2021	IPR036890	Histidine kinase/HSP90-like ATPase superfamily
Meg19_1012_Bin_504_Helarchaeota	Meg19_1012_Bin_504_scaffold_3834_42_10	3759bdc213707dbf073b2844b27e2e92	229	PANTHER	PTHR43637:SF1	UPF0273 PROTEIN TM_0370	2	227	5.2e-38	T	23-07-2021	-	-
Meg19_1012_Bin_504_Helarchaeota	Meg19_1012_Bin_504_scaffold_3834_42_10	3759bdc213707dbf073b2844b27e2e92	229	ProSiteProfiles	PS51146	KaiC domain profile.	4	229	31.158	T	23-07-2021	IPR010624	KaiC domain
Meg19_1012_Bin_504_Helarchaeota	Meg19_1012_Bin_504_scaffold_3834_42_10	3759bdc213707dbf073b2844b27e2e92	229	Gene3D	G3DSA:3.40.50.300	-	2	228	1.5e-40	T	23-07-2021	-	-
Meg19_1012_Bin_504_Helarchaeota	Meg19_1012_Bin_504_scaffold_3834_42_10	3759bdc213707dbf073b2844b27e2e92	229	SUPERFAMILY	SSF52540	P-loop containing nucleoside triphosphate hydrolases	2	222	1.95e-30	T	23-07-2021	IPR027417	P-loop containing nucleoside triphosphate hydrolase
Meg19_1012_Bin_504_Helarchaeota	Meg19_1012_Bin_504_scaffold_3834_42_10	3759bdc213707dbf073b2844b27e2e92	229	Pfam	PF06745	KaiC	8	226	1.3e-39	T	23-07-2021	IPR014774	KaiC-like domain
Meg19_1012_Bin_504_Helarchaeota	Meg19_1012_Bin_504_scaffold_3834_42_10	3759bdc213707dbf073b2844b27e2e92	229	PANTHER	PTHR43637	UPF0273 PROTEIN TM_0370	2	227	5.2e-38	T	23-07-2021	-	-
Meg19_1012_Bin_504_Helarchaeota	Meg19_1012_Bin_504_scaffold_111835_142_3	4de310170da4e528f7ce984260e0db95	269	PRINTS	PR00033	AsnC bacterial regulatory protein HTH signature	40	59	2.2e-08	T	23-07-2021	IPR000485	AsnC-type HTH domain
Meg19_1012_Bin_504_Helarchaeota	Meg19_1012_Bin_504_scaffold_111835_142_3	4de310170da4e528f7ce984260e0db95	269	PRINTS	PR00033	AsnC bacterial regulatory protein HTH signature	29	40	2.2e-08	T	23-07-2021	IPR000485	AsnC-type HTH domain
Meg19_1012_Bin_504_Helarchaeota	Meg19_1012_Bin_504_scaffold_111835_142_3	4de310170da4e528f7ce984260e0db95	269	PRINTS	PR00033	AsnC bacterial regulatory protein HTH signature	13	29	2.2e-08	T	23-07-2021	IPR000485	AsnC-type HTH domain
Meg19_1012_Bin_504_Helarchaeota	Meg19_1012_Bin_504_scaffold_111835_142_3	4de310170da4e528f7ce984260e0db95	269	PANTHER	PTHR43637	UPF0273 PROTEIN TM_0370	76	222	5.6e-23	T	23-07-2021	-	-
Meg19_1012_Bin_504_Helarchaeota	Meg19_1012_Bin_504_scaffold_111835_142_3	4de310170da4e528f7ce984260e0db95	269	Gene3D	G3DSA:3.40.50.300	-	75	268	8e-29	T	23-07-2021	-	-
Meg19_1012_Bin_504_Helarchaeota	Meg19_1012_Bin_504_scaffold_111835_142_3	4de310170da4e528f7ce984260e0db95	269	SUPERFAMILY	SSF52540	P-loop containing nucleoside triphosphate hydrolases	77	256	1.71e-22	T	23-07-2021	IPR027417	P-loop containing nucleoside triphosphate hydrolase
Meg19_1012_Bin_504_Helarchaeota	Meg19_1012_Bin_504_scaffold_111835_142_3	4de310170da4e528f7ce984260e0db95	269	Pfam	PF13412	Winged helix-turn-helix DNA-binding	14	60	1.6e-13	T	23-07-2021	-	-
Meg19_1012_Bin_504_Helarchaeota	Meg19_1012_Bin_504_scaffold_111835_142_3	4de310170da4e528f7ce984260e0db95	269	Pfam	PF06745	KaiC	81	185	2.2e-16	T	23-07-2021	IPR014774	KaiC-like domain
Meg19_1012_Bin_504_Helarchaeota	Meg19_1012_Bin_504_scaffold_111835_142_3	4de310170da4e528f7ce984260e0db95	269	ProSiteProfiles	PS50956	AsnC-type HTH domain profile.	13	67	19.514	T	23-07-2021	IPR000485	AsnC-type HTH domain
Meg19_1012_Bin_504_Helarchaeota	Meg19_1012_Bin_504_scaffold_111835_142_3	4de310170da4e528f7ce984260e0db95	269	CDD	cd00090	HTH_ARSR	14	60	8.67899e-09	T	23-07-2021	IPR011991	ArsR-like helix-turn-helix domain
Meg19_1012_Bin_504_Helarchaeota	Meg19_1012_Bin_504_scaffold_111835_142_3	4de310170da4e528f7ce984260e0db95	269	Gene3D	G3DSA:1.10.10.10	winged helix"" repressor DNA binding domain	8	61	1.6e-14	T	23-07-2021	IPR036388	Winged helix-like DNA-binding domain superfamily
Meg19_1012_Bin_504_Helarchaeota	Meg19_1012_Bin_504_scaffold_111835_142_3	4de310170da4e528f7ce984260e0db95	269	SUPERFAMILY	SSF46785	Winged helix DNA-binding domain	12	61	1.37e-11	T	23-07-2021	IPR036390	Winged helix DNA-binding domain superfamily
Meg22_1416_Bin_151_Lokiarchaeota	Meg22_1416_Bin_151_scaffold_25_1_6	980fbdc9d52445fe53060544650704b1	428	TIGRFAM	TIGR00414	serS: serine--tRNA ligase	1	419	5.8e-153	T	23-07-2021	IPR002317	Serine-tRNA ligase, type1
Meg22_1416_Bin_151_Lokiarchaeota	Meg22_1416_Bin_151_scaffold_25_1_6	980fbdc9d52445fe53060544650704b1	428	Coils	Coil	Coil	425	428	-	T	23-07-2021	-	-
Meg22_1416_Bin_151_Lokiarchaeota	Meg22_1416_Bin_151_scaffold_25_1_6	980fbdc9d52445fe53060544650704b1	428	Coils	Coil	Coil	45	101	-	T	23-07-2021	-	-
Meg22_1416_Bin_151_Lokiarchaeota	Meg22_1416_Bin_151_scaffold_25_1_6	980fbdc9d52445fe53060544650704b1	428	PANTHER	PTHR11778:SF7	SERINE--TRNA LIGASE, CYTOPLASMIC-RELATED	1	422	3e-164	T	23-07-2021	-	-
Meg22_1416_Bin_151_Lokiarchaeota	Meg22_1416_Bin_151_scaffold_25_1_6	980fbdc9d52445fe53060544650704b1	428	Hamap	MF_00176	Serine--tRNA ligase [serS].	1	424	37.3249	T	23-07-2021	IPR002317	Serine-tRNA ligase, type1
Meg22_1416_Bin_151_Lokiarchaeota	Meg22_1416_Bin_151_scaffold_25_1_6	980fbdc9d52445fe53060544650704b1	428	PANTHER	PTHR11778	SERYL-TRNA SYNTHETASE	1	422	3e-164	T	23-07-2021	IPR002317	Serine-tRNA ligase, type1
Meg22_1416_Bin_151_Lokiarchaeota	Meg22_1416_Bin_151_scaffold_25_1_6	980fbdc9d52445fe53060544650704b1	428	Pfam	PF02403	Seryl-tRNA synthetase N-terminal domain	1	110	1.4e-23	T	23-07-2021	IPR015866	Serine-tRNA synthetase, type1, N-terminal
Meg22_1416_Bin_151_Lokiarchaeota	Meg22_1416_Bin_151_scaffold_25_1_6	980fbdc9d52445fe53060544650704b1	428	SUPERFAMILY	SSF46589	tRNA-binding arm	1	115	4.34e-23	T	23-07-2021	IPR010978	Class I and II aminoacyl-tRNA synthetase, tRNA-binding arm
Meg22_1416_Bin_151_Lokiarchaeota	Meg22_1416_Bin_151_scaffold_25_1_6	980fbdc9d52445fe53060544650704b1	428	Gene3D	G3DSA:3.30.930.10	Bira Bifunctional Protein; Domain 2	108	428	8e-129	T	23-07-2021	-	-
Meg22_1416_Bin_151_Lokiarchaeota	Meg22_1416_Bin_151_scaffold_25_1_6	980fbdc9d52445fe53060544650704b1	428	Pfam	PF00587	tRNA synthetase class II core domain (G, H, P, S and T)	221	402	1.6e-36	T	23-07-2021	IPR002314	Aminoacyl-tRNA synthetase, class II (G/ P/ S/T)
Meg22_1416_Bin_151_Lokiarchaeota	Meg22_1416_Bin_151_scaffold_25_1_6	980fbdc9d52445fe53060544650704b1	428	Gene3D	G3DSA:1.10.287.40	-	1	106	3.4e-25	T	23-07-2021	IPR042103	Serine-tRNA synthetase, type1, N-terminal domain superfamily
Meg22_1416_Bin_151_Lokiarchaeota	Meg22_1416_Bin_151_scaffold_25_1_6	980fbdc9d52445fe53060544650704b1	428	PRINTS	PR00981	Seryl-tRNA synthetase signature	277	290	1.5e-32	T	23-07-2021	IPR002317	Serine-tRNA ligase, type1
Meg22_1416_Bin_151_Lokiarchaeota	Meg22_1416_Bin_151_scaffold_25_1_6	980fbdc9d52445fe53060544650704b1	428	PRINTS	PR00981	Seryl-tRNA synthetase signature	352	368	1.5e-32	T	23-07-2021	IPR002317	Serine-tRNA ligase, type1
Meg22_1416_Bin_151_Lokiarchaeota	Meg22_1416_Bin_151_scaffold_25_1_6	980fbdc9d52445fe53060544650704b1	428	PRINTS	PR00981	Seryl-tRNA synthetase signature	317	330	1.5e-32	T	23-07-2021	IPR002317	Serine-tRNA ligase, type1
Meg22_1416_Bin_151_Lokiarchaeota	Meg22_1416_Bin_151_scaffold_25_1_6	980fbdc9d52445fe53060544650704b1	428	PRINTS	PR00981	Seryl-tRNA synthetase signature	334	350	1.5e-32	T	23-07-2021	IPR002317	Serine-tRNA ligase, type1
Meg22_1416_Bin_151_Lokiarchaeota	Meg22_1416_Bin_151_scaffold_25_1_6	980fbdc9d52445fe53060544650704b1	428	PRINTS	PR00981	Seryl-tRNA synthetase signature	265	277	1.5e-32	T	23-07-2021	IPR002317	Serine-tRNA ligase, type1
Meg22_1416_Bin_151_Lokiarchaeota	Meg22_1416_Bin_151_scaffold_25_1_6	980fbdc9d52445fe53060544650704b1	428	CDD	cd00770	SerRS_core	123	419	8.47442e-178	T	23-07-2021	IPR033729	Serine-tRNA ligase catalytic core domain
Meg22_1416_Bin_151_Lokiarchaeota	Meg22_1416_Bin_151_scaffold_25_1_6	980fbdc9d52445fe53060544650704b1	428	PIRSF	PIRSF001529	Ser-tRNA_ligase	1	428	1.1e-165	T	23-07-2021	IPR002317	Serine-tRNA ligase, type1
Meg22_1416_Bin_151_Lokiarchaeota	Meg22_1416_Bin_151_scaffold_25_1_6	980fbdc9d52445fe53060544650704b1	428	SUPERFAMILY	SSF55681	Class II aaRS and biotin synthetases	119	420	2.88e-87	T	23-07-2021	-	-
Meg22_1416_Bin_151_Lokiarchaeota	Meg22_1416_Bin_151_scaffold_25_1_6	980fbdc9d52445fe53060544650704b1	428	ProSiteProfiles	PS50862	Aminoacyl-transfer RNA synthetases class-II family profile.	179	412	21.554	T	23-07-2021	IPR006195	Aminoacyl-tRNA synthetase, class II
Meg22_1416_Bin_151_Lokiarchaeota	Meg22_1416_Bin_151_scaffold_792_22_13	51c9945ff2703c13f17258d763572870	258	Gene3D	G3DSA:3.40.50.720	-	1	256	2e-81	T	23-07-2021	-	-
Meg22_1416_Bin_151_Lokiarchaeota	Meg22_1416_Bin_151_scaffold_792_22_13	51c9945ff2703c13f17258d763572870	258	Pfam	PF13561	Enoyl-(Acyl carrier protein) reductase	15	254	1.7e-60	T	23-07-2021	-	-
Meg22_1416_Bin_151_Lokiarchaeota	Meg22_1416_Bin_151_scaffold_792_22_13	51c9945ff2703c13f17258d763572870	258	ProSitePatterns	PS00061	Short-chain dehydrogenases/reductases family signature.	141	169	-	T	23-07-2021	IPR020904	Short-chain dehydrogenase/reductase, conserved site
Meg22_1416_Bin_151_Lokiarchaeota	Meg22_1416_Bin_151_scaffold_792_22_13	51c9945ff2703c13f17258d763572870	258	PANTHER	PTHR24321:SF8	DEHYDROGENASES, SHORT CHAIN	2	256	2.5e-68	T	23-07-2021	-	-
Meg22_1416_Bin_151_Lokiarchaeota	Meg22_1416_Bin_151_scaffold_792_22_13	51c9945ff2703c13f17258d763572870	258	PANTHER	PTHR24321	DEHYDROGENASES, SHORT CHAIN	2	256	2.5e-68	T	23-07-2021	-	-
Meg22_1416_Bin_151_Lokiarchaeota	Meg22_1416_Bin_151_scaffold_792_22_13	51c9945ff2703c13f17258d763572870	258	SUPERFAMILY	SSF51735	NAD(P)-binding Rossmann-fold domains	4	256	6.5e-83	T	23-07-2021	IPR036291	NAD(P)-binding domain superfamily
Meg22_1416_Bin_151_Lokiarchaeota	Meg22_1416_Bin_151_scaffold_792_22_13	51c9945ff2703c13f17258d763572870	258	PRINTS	PR00080	Short-chain dehydrogenase/reductase (SDR) superfamily signature	154	173	9.4e-08	T	23-07-2021	IPR002347	Short-chain dehydrogenase/reductase SDR
Meg22_1416_Bin_151_Lokiarchaeota	Meg22_1416_Bin_151_scaffold_792_22_13	51c9945ff2703c13f17258d763572870	258	PRINTS	PR00080	Short-chain dehydrogenase/reductase (SDR) superfamily signature	81	92	9.4e-08	T	23-07-2021	IPR002347	Short-chain dehydrogenase/reductase SDR
Meg22_1416_Bin_151_Lokiarchaeota	Meg22_1416_Bin_151_scaffold_792_22_13	51c9945ff2703c13f17258d763572870	258	PRINTS	PR00081	Glucose/ribitol dehydrogenase family signature	81	92	6.4e-40	T	23-07-2021	IPR002347	Short-chain dehydrogenase/reductase SDR
Meg22_1416_Bin_151_Lokiarchaeota	Meg22_1416_Bin_151_scaffold_792_22_13	51c9945ff2703c13f17258d763572870	258	PRINTS	PR00081	Glucose/ribitol dehydrogenase family signature	128	144	6.4e-40	T	23-07-2021	IPR002347	Short-chain dehydrogenase/reductase SDR
Meg22_1416_Bin_151_Lokiarchaeota	Meg22_1416_Bin_151_scaffold_792_22_13	51c9945ff2703c13f17258d763572870	258	PRINTS	PR00081	Glucose/ribitol dehydrogenase family signature	218	238	6.4e-40	T	23-07-2021	IPR002347	Short-chain dehydrogenase/reductase SDR
Meg22_1416_Bin_151_Lokiarchaeota	Meg22_1416_Bin_151_scaffold_792_22_13	51c9945ff2703c13f17258d763572870	258	PRINTS	PR00081	Glucose/ribitol dehydrogenase family signature	7	24	6.4e-40	T	23-07-2021	IPR002347	Short-chain dehydrogenase/reductase SDR
Meg22_1416_Bin_151_Lokiarchaeota	Meg22_1416_Bin_151_scaffold_792_22_13	51c9945ff2703c13f17258d763572870	258	PRINTS	PR00081	Glucose/ribitol dehydrogenase family signature	174	191	6.4e-40	T	23-07-2021	IPR002347	Short-chain dehydrogenase/reductase SDR
Meg22_1416_Bin_151_Lokiarchaeota	Meg22_1416_Bin_151_scaffold_792_22_13	51c9945ff2703c13f17258d763572870	258	PRINTS	PR00081	Glucose/ribitol dehydrogenase family signature	154	173	6.4e-40	T	23-07-2021	IPR002347	Short-chain dehydrogenase/reductase SDR
Meg22_1214_Bin_191_Lokiarchaeota	Meg22_1214_Bin_191_scaffold_2389_27_39	51c9945ff2703c13f17258d763572870	258	Gene3D	G3DSA:3.40.50.720	-	1	256	2e-81	T	23-07-2021	-	-
Meg22_1214_Bin_191_Lokiarchaeota	Meg22_1214_Bin_191_scaffold_2389_27_39	51c9945ff2703c13f17258d763572870	258	Pfam	PF13561	Enoyl-(Acyl carrier protein) reductase	15	254	1.7e-60	T	23-07-2021	-	-
Meg22_1214_Bin_191_Lokiarchaeota	Meg22_1214_Bin_191_scaffold_2389_27_39	51c9945ff2703c13f17258d763572870	258	ProSitePatterns	PS00061	Short-chain dehydrogenases/reductases family signature.	141	169	-	T	23-07-2021	IPR020904	Short-chain dehydrogenase/reductase, conserved site
Meg22_1214_Bin_191_Lokiarchaeota	Meg22_1214_Bin_191_scaffold_2389_27_39	51c9945ff2703c13f17258d763572870	258	PANTHER	PTHR24321:SF8	DEHYDROGENASES, SHORT CHAIN	2	256	2.5e-68	T	23-07-2021	-	-
Meg22_1214_Bin_191_Lokiarchaeota	Meg22_1214_Bin_191_scaffold_2389_27_39	51c9945ff2703c13f17258d763572870	258	PANTHER	PTHR24321	DEHYDROGENASES, SHORT CHAIN	2	256	2.5e-68	T	23-07-2021	-	-
Meg22_1214_Bin_191_Lokiarchaeota	Meg22_1214_Bin_191_scaffold_2389_27_39	51c9945ff2703c13f17258d763572870	258	SUPERFAMILY	SSF51735	NAD(P)-binding Rossmann-fold domains	4	256	6.5e-83	T	23-07-2021	IPR036291	NAD(P)-binding domain superfamily
Meg22_1214_Bin_191_Lokiarchaeota	Meg22_1214_Bin_191_scaffold_2389_27_39	51c9945ff2703c13f17258d763572870	258	PRINTS	PR00080	Short-chain dehydrogenase/reductase (SDR) superfamily signature	154	173	9.4e-08	T	23-07-2021	IPR002347	Short-chain dehydrogenase/reductase SDR
Meg22_1214_Bin_191_Lokiarchaeota	Meg22_1214_Bin_191_scaffold_2389_27_39	51c9945ff2703c13f17258d763572870	258	PRINTS	PR00080	Short-chain dehydrogenase/reductase (SDR) superfamily signature	81	92	9.4e-08	T	23-07-2021	IPR002347	Short-chain dehydrogenase/reductase SDR
Meg22_1214_Bin_191_Lokiarchaeota	Meg22_1214_Bin_191_scaffold_2389_27_39	51c9945ff2703c13f17258d763572870	258	PRINTS	PR00081	Glucose/ribitol dehydrogenase family signature	81	92	6.4e-40	T	23-07-2021	IPR002347	Short-chain dehydrogenase/reductase SDR
Meg22_1214_Bin_191_Lokiarchaeota	Meg22_1214_Bin_191_scaffold_2389_27_39	51c9945ff2703c13f17258d763572870	258	PRINTS	PR00081	Glucose/ribitol dehydrogenase family signature	128	144	6.4e-40	T	23-07-2021	IPR002347	Short-chain dehydrogenase/reductase SDR
Meg22_1214_Bin_191_Lokiarchaeota	Meg22_1214_Bin_191_scaffold_2389_27_39	51c9945ff2703c13f17258d763572870	258	PRINTS	PR00081	Glucose/ribitol dehydrogenase family signature	218	238	6.4e-40	T	23-07-2021	IPR002347	Short-chain dehydrogenase/reductase SDR
Meg22_1214_Bin_191_Lokiarchaeota	Meg22_1214_Bin_191_scaffold_2389_27_39	51c9945ff2703c13f17258d763572870	258	PRINTS	PR00081	Glucose/ribitol dehydrogenase family signature	7	24	6.4e-40	T	23-07-2021	IPR002347	Short-chain dehydrogenase/reductase SDR
Meg22_1214_Bin_191_Lokiarchaeota	Meg22_1214_Bin_191_scaffold_2389_27_39	51c9945ff2703c13f17258d763572870	258	PRINTS	PR00081	Glucose/ribitol dehydrogenase family signature	174	191	6.4e-40	T	23-07-2021	IPR002347	Short-chain dehydrogenase/reductase SDR
Meg22_1214_Bin_191_Lokiarchaeota	Meg22_1214_Bin_191_scaffold_2389_27_39	51c9945ff2703c13f17258d763572870	258	PRINTS	PR00081	Glucose/ribitol dehydrogenase family signature	154	173	6.4e-40	T	23-07-2021	IPR002347	Short-chain dehydrogenase/reductase SDR
Meg22_1012_Bin_233_Lokiarchaeota	Meg22_1012_Bin_233_scaffold_9_3_19	51c9945ff2703c13f17258d763572870	258	Gene3D	G3DSA:3.40.50.720	-	1	256	2e-81	T	23-07-2021	-	-
Meg22_1012_Bin_233_Lokiarchaeota	Meg22_1012_Bin_233_scaffold_9_3_19	51c9945ff2703c13f17258d763572870	258	Pfam	PF13561	Enoyl-(Acyl carrier protein) reductase	15	254	1.7e-60	T	23-07-2021	-	-
Meg22_1012_Bin_233_Lokiarchaeota	Meg22_1012_Bin_233_scaffold_9_3_19	51c9945ff2703c13f17258d763572870	258	ProSitePatterns	PS00061	Short-chain dehydrogenases/reductases family signature.	141	169	-	T	23-07-2021	IPR020904	Short-chain dehydrogenase/reductase, conserved site
Meg22_1012_Bin_233_Lokiarchaeota	Meg22_1012_Bin_233_scaffold_9_3_19	51c9945ff2703c13f17258d763572870	258	PANTHER	PTHR24321:SF8	DEHYDROGENASES, SHORT CHAIN	2	256	2.5e-68	T	23-07-2021	-	-
Meg22_1012_Bin_233_Lokiarchaeota	Meg22_1012_Bin_233_scaffold_9_3_19	51c9945ff2703c13f17258d763572870	258	PANTHER	PTHR24321	DEHYDROGENASES, SHORT CHAIN	2	256	2.5e-68	T	23-07-2021	-	-
Meg22_1012_Bin_233_Lokiarchaeota	Meg22_1012_Bin_233_scaffold_9_3_19	51c9945ff2703c13f17258d763572870	258	SUPERFAMILY	SSF51735	NAD(P)-binding Rossmann-fold domains	4	256	6.5e-83	T	23-07-2021	IPR036291	NAD(P)-binding domain superfamily
Meg22_1012_Bin_233_Lokiarchaeota	Meg22_1012_Bin_233_scaffold_9_3_19	51c9945ff2703c13f17258d763572870	258	PRINTS	PR00080	Short-chain dehydrogenase/reductase (SDR) superfamily signature	154	173	9.4e-08	T	23-07-2021	IPR002347	Short-chain dehydrogenase/reductase SDR
Meg22_1012_Bin_233_Lokiarchaeota	Meg22_1012_Bin_233_scaffold_9_3_19	51c9945ff2703c13f17258d763572870	258	PRINTS	PR00080	Short-chain dehydrogenase/reductase (SDR) superfamily signature	81	92	9.4e-08	T	23-07-2021	IPR002347	Short-chain dehydrogenase/reductase SDR
Meg22_1012_Bin_233_Lokiarchaeota	Meg22_1012_Bin_233_scaffold_9_3_19	51c9945ff2703c13f17258d763572870	258	PRINTS	PR00081	Glucose/ribitol dehydrogenase family signature	81	92	6.4e-40	T	23-07-2021	IPR002347	Short-chain dehydrogenase/reductase SDR
Meg22_1012_Bin_233_Lokiarchaeota	Meg22_1012_Bin_233_scaffold_9_3_19	51c9945ff2703c13f17258d763572870	258	PRINTS	PR00081	Glucose/ribitol dehydrogenase family signature	128	144	6.4e-40	T	23-07-2021	IPR002347	Short-chain dehydrogenase/reductase SDR
Meg22_1012_Bin_233_Lokiarchaeota	Meg22_1012_Bin_233_scaffold_9_3_19	51c9945ff2703c13f17258d763572870	258	PRINTS	PR00081	Glucose/ribitol dehydrogenase family signature	218	238	6.4e-40	T	23-07-2021	IPR002347	Short-chain dehydrogenase/reductase SDR
Meg22_1012_Bin_233_Lokiarchaeota	Meg22_1012_Bin_233_scaffold_9_3_19	51c9945ff2703c13f17258d763572870	258	PRINTS	PR00081	Glucose/ribitol dehydrogenase family signature	7	24	6.4e-40	T	23-07-2021	IPR002347	Short-chain dehydrogenase/reductase SDR
Meg22_1012_Bin_233_Lokiarchaeota	Meg22_1012_Bin_233_scaffold_9_3_19	51c9945ff2703c13f17258d763572870	258	PRINTS	PR00081	Glucose/ribitol dehydrogenase family signature	174	191	6.4e-40	T	23-07-2021	IPR002347	Short-chain dehydrogenase/reductase SDR
Meg22_1012_Bin_233_Lokiarchaeota	Meg22_1012_Bin_233_scaffold_9_3_19	51c9945ff2703c13f17258d763572870	258	PRINTS	PR00081	Glucose/ribitol dehydrogenase family signature	154	173	6.4e-40	T	23-07-2021	IPR002347	Short-chain dehydrogenase/reductase SDR
Meg22_1416_Bin_151_Lokiarchaeota	Meg22_1416_Bin_151_scaffold_421_13_12	083531876a3be59cc4cfd495583254dc	586	Pfam	PF01565	FAD binding domain	48	186	2.3e-43	T	23-07-2021	IPR006094	FAD linked oxidase, N-terminal
Meg22_1416_Bin_151_Lokiarchaeota	Meg22_1416_Bin_151_scaffold_421_13_12	083531876a3be59cc4cfd495583254dc	586	SUPERFAMILY	SSF46548	alpha-helical ferredoxin	447	579	1.01e-17	T	23-07-2021	IPR009051	Alpha-helical ferredoxin
Meg22_1416_Bin_151_Lokiarchaeota	Meg22_1416_Bin_151_scaffold_421_13_12	083531876a3be59cc4cfd495583254dc	586	Gene3D	G3DSA:3.30.465.40	-	7	242	2.9e-71	T	23-07-2021	-	-
Meg22_1416_Bin_151_Lokiarchaeota	Meg22_1416_Bin_151_scaffold_421_13_12	083531876a3be59cc4cfd495583254dc	586	Pfam	PF02913	FAD linked oxidases, C-terminal domain	224	467	6.7e-41	T	23-07-2021	IPR004113	FAD-linked oxidase, C-terminal
Meg22_1416_Bin_151_Lokiarchaeota	Meg22_1416_Bin_151_scaffold_421_13_12	083531876a3be59cc4cfd495583254dc	586	ProSitePatterns	PS00198	4Fe-4S ferredoxin-type iron-sulfur binding region signature.	550	561	-	T	23-07-2021	IPR017900	4Fe-4S ferredoxin, iron-sulphur binding, conserved site
Meg22_1416_Bin_151_Lokiarchaeota	Meg22_1416_Bin_151_scaffold_421_13_12	083531876a3be59cc4cfd495583254dc	586	PANTHER	PTHR42934	GLYCOLATE OXIDASE SUBUNIT GLCD	4	468	2.2e-120	T	23-07-2021	-	-
Meg22_1416_Bin_151_Lokiarchaeota	Meg22_1416_Bin_151_scaffold_421_13_12	083531876a3be59cc4cfd495583254dc	586	Gene3D	G3DSA:1.10.45.10	-	430	468	7.4e-09	T	23-07-2021	IPR016171	Vanillyl-alcohol oxidase, C-terminal subdomain 2
Meg22_1416_Bin_151_Lokiarchaeota	Meg22_1416_Bin_151_scaffold_421_13_12	083531876a3be59cc4cfd495583254dc	586	Gene3D	G3DSA:3.30.70.2740	-	346	429	6.6e-06	T	23-07-2021	-	-
Meg22_1416_Bin_151_Lokiarchaeota	Meg22_1416_Bin_151_scaffold_421_13_12	083531876a3be59cc4cfd495583254dc	586	SUPERFAMILY	SSF55103	FAD-linked oxidases, C-terminal domain	227	468	2.45e-39	T	23-07-2021	IPR016164	FAD-linked oxidase-like, C-terminal
Meg22_1416_Bin_151_Lokiarchaeota	Meg22_1416_Bin_151_scaffold_421_13_12	083531876a3be59cc4cfd495583254dc	586	ProSiteProfiles	PS51379	4Fe-4S ferredoxin-type iron-sulfur binding domain profile.	539	570	7.273	T	23-07-2021	IPR017896	4Fe-4S ferredoxin-type, iron-sulphur binding domain
Meg22_1416_Bin_151_Lokiarchaeota	Meg22_1416_Bin_151_scaffold_421_13_12	083531876a3be59cc4cfd495583254dc	586	ProSiteProfiles	PS51387	PCMH-type FAD-binding domain profile.	44	223	25.184	T	23-07-2021	IPR016166	FAD-binding domain, PCMH-type
Meg22_1416_Bin_151_Lokiarchaeota	Meg22_1416_Bin_151_scaffold_421_13_12	083531876a3be59cc4cfd495583254dc	586	Pfam	PF13534	4Fe-4S dicluster domain	498	565	2.2e-07	T	23-07-2021	-	-
Meg22_1416_Bin_151_Lokiarchaeota	Meg22_1416_Bin_151_scaffold_421_13_12	083531876a3be59cc4cfd495583254dc	586	ProSiteProfiles	PS51379	4Fe-4S ferredoxin-type iron-sulfur binding domain profile.	490	520	6.87	T	23-07-2021	IPR017896	4Fe-4S ferredoxin-type, iron-sulphur binding domain
Meg22_1416_Bin_151_Lokiarchaeota	Meg22_1416_Bin_151_scaffold_421_13_12	083531876a3be59cc4cfd495583254dc	586	SUPERFAMILY	SSF56176	FAD-binding/transporter-associated domain-like	11	224	4.53e-66	T	23-07-2021	IPR036318	FAD-binding, type PCMH-like superfamily
Meg19_1012_Bin_504_Helarchaeota	Meg19_1012_Bin_504_scaffold_44858_113_2	acdcc713a125c9a63c1ad7b9bc622166	359	PANTHER	PTHR10803	ARSENICAL PUMP-DRIVING ATPASE ARSENITE-TRANSLOCATING ATPASE	4	325	1.3e-34	T	23-07-2021	IPR016300	Arsenical pump ATPase, ArsA/GET3
Meg19_1012_Bin_504_Helarchaeota	Meg19_1012_Bin_504_scaffold_44858_113_2	acdcc713a125c9a63c1ad7b9bc622166	359	Coils	Coil	Coil	265	299	-	T	23-07-2021	-	-
Meg19_1012_Bin_504_Helarchaeota	Meg19_1012_Bin_504_scaffold_44858_113_2	acdcc713a125c9a63c1ad7b9bc622166	359	CDD	cd02035	ArsA	5	318	1.06229e-39	T	23-07-2021	-	-
Meg19_1012_Bin_504_Helarchaeota	Meg19_1012_Bin_504_scaffold_44858_113_2	acdcc713a125c9a63c1ad7b9bc622166	359	Gene3D	G3DSA:3.40.50.300	-	2	331	7.7e-51	T	23-07-2021	-	-
Meg19_1012_Bin_504_Helarchaeota	Meg19_1012_Bin_504_scaffold_44858_113_2	acdcc713a125c9a63c1ad7b9bc622166	359	Pfam	PF02374	Anion-transporting ATPase	5	322	4.7e-46	T	23-07-2021	IPR025723	Anion-transporting ATPase-like domain
Meg19_1012_Bin_504_Helarchaeota	Meg19_1012_Bin_504_scaffold_44858_113_2	acdcc713a125c9a63c1ad7b9bc622166	359	SUPERFAMILY	SSF52540	P-loop containing nucleoside triphosphate hydrolases	3	302	4.2e-22	T	23-07-2021	IPR027417	P-loop containing nucleoside triphosphate hydrolase
Meg19_1012_Bin_504_Helarchaeota	Meg19_1012_Bin_504_scaffold_8346_59_6	a135962a534e529e0d5d22ea3cec406d	319	SUPERFAMILY	SSF102114	Radical SAM enzymes	27	221	2.35e-19	T	23-07-2021	-	-
Meg19_1012_Bin_504_Helarchaeota	Meg19_1012_Bin_504_scaffold_8346_59_6	a135962a534e529e0d5d22ea3cec406d	319	PANTHER	PTHR43787:SF11	UPF0026 PROTEIN SLR1464	1	296	3.2e-98	T	23-07-2021	-	-
Meg19_1012_Bin_504_Helarchaeota	Meg19_1012_Bin_504_scaffold_8346_59_6	a135962a534e529e0d5d22ea3cec406d	319	SFLD	SFLDG01083	Uncharacterised Radical SAM Subgroup 1	3	310	0	T	23-07-2021	IPR040084	GTPase Obg
Meg19_1012_Bin_504_Helarchaeota	Meg19_1012_Bin_504_scaffold_8346_59_6	a135962a534e529e0d5d22ea3cec406d	319	Pfam	PF04055	Radical SAM superfamily	25	187	1.2e-14	T	23-07-2021	IPR007197	Radical SAM
Meg19_1012_Bin_504_Helarchaeota	Meg19_1012_Bin_504_scaffold_8346_59_6	a135962a534e529e0d5d22ea3cec406d	319	CDD	cd01335	Radical_SAM	23	205	7.94367e-07	T	23-07-2021	-	-
Meg19_1012_Bin_504_Helarchaeota	Meg19_1012_Bin_504_scaffold_8346_59_6	a135962a534e529e0d5d22ea3cec406d	319	Gene3D	G3DSA:3.20.20.70	Aldolase class I	21	271	2.3e-21	T	23-07-2021	IPR013785	Aldolase-type TIM barrel
Meg19_1012_Bin_504_Helarchaeota	Meg19_1012_Bin_504_scaffold_8346_59_6	a135962a534e529e0d5d22ea3cec406d	319	SFLD	SFLDS00029	Radical SAM	3	310	0	T	23-07-2021	IPR007197	Radical SAM
Meg19_1012_Bin_504_Helarchaeota	Meg19_1012_Bin_504_scaffold_8346_59_6	a135962a534e529e0d5d22ea3cec406d	319	PANTHER	PTHR43787	FEMO COFACTOR BIOSYNTHESIS PROTEIN NIFB-RELATED	1	296	3.2e-98	T	23-07-2021	-	-
Meg19_1012_Bin_504_Helarchaeota	Meg19_1012_Bin_504_scaffold_8346_59_6	a135962a534e529e0d5d22ea3cec406d	319	SMART	SM00729	MiaB	17	231	0.0002	T	23-07-2021	IPR006638	Elp3/MiaB/NifB
Meg19_1012_Bin_504_Helarchaeota	Meg19_1012_Bin_504_scaffold_10751_69_14	b7eb073f3047c494fec14516ba695152	701	SUPERFAMILY	SSF48310	Aldehyde ferredoxin oxidoreductase, C-terminal domains	296	685	1.96e-83	T	23-07-2021	IPR036021	Aldehyde ferredoxin oxidoreductase-like, C-terminal
Meg19_1012_Bin_504_Helarchaeota	Meg19_1012_Bin_504_scaffold_10751_69_14	b7eb073f3047c494fec14516ba695152	701	Pfam	PF01314	Aldehyde ferredoxin oxidoreductase, domains 2 & 3	299	676	3.1e-90	T	23-07-2021	IPR001203	Aldehyde ferredoxin oxidoreductase, C-terminal
Meg19_1012_Bin_504_Helarchaeota	Meg19_1012_Bin_504_scaffold_10751_69_14	b7eb073f3047c494fec14516ba695152	701	PANTHER	PTHR30038:SF0	TUNGSTEN-CONTAINING ALDEHYDE FERREDOXIN OXIDOREDUCTASE	15	679	1.3e-143	T	23-07-2021	-	-
Meg19_1012_Bin_504_Helarchaeota	Meg19_1012_Bin_504_scaffold_10751_69_14	b7eb073f3047c494fec14516ba695152	701	Gene3D	G3DSA:3.60.9.10	Aldehyde ferredoxin oxidoreductase	14	235	1.5e-74	T	23-07-2021	IPR036503	Aldehyde ferredoxin oxidoreductase, N-terminal domain superfamily
Meg19_1012_Bin_504_Helarchaeota	Meg19_1012_Bin_504_scaffold_10751_69_14	b7eb073f3047c494fec14516ba695152	701	PANTHER	PTHR30038	ALDEHYDE FERREDOXIN OXIDOREDUCTASE	15	679	1.3e-143	T	23-07-2021	-	-
Meg19_1012_Bin_504_Helarchaeota	Meg19_1012_Bin_504_scaffold_10751_69_14	b7eb073f3047c494fec14516ba695152	701	SUPERFAMILY	SSF56228	Aldehyde ferredoxin oxidoreductase, N-terminal domain	16	234	9.94e-61	T	23-07-2021	IPR036503	Aldehyde ferredoxin oxidoreductase, N-terminal domain superfamily
Meg19_1012_Bin_504_Helarchaeota	Meg19_1012_Bin_504_scaffold_10751_69_14	b7eb073f3047c494fec14516ba695152	701	Gene3D	G3DSA:1.10.599.10	Aldehyde Ferredoxin Oxidoreductase Protein	302	676	1e-102	T	23-07-2021	IPR013985	Aldehyde ferredoxin oxidoreductase, domain 3
Meg19_1012_Bin_504_Helarchaeota	Meg19_1012_Bin_504_scaffold_10751_69_14	b7eb073f3047c494fec14516ba695152	701	Pfam	PF02730	Aldehyde ferredoxin oxidoreductase, N-terminal domain	19	229	3.4e-64	T	23-07-2021	IPR013983	Aldehyde ferredoxin oxidoreductase, N-terminal
Meg19_1012_Bin_504_Helarchaeota	Meg19_1012_Bin_504_scaffold_10751_69_14	b7eb073f3047c494fec14516ba695152	701	Gene3D	G3DSA:1.10.569.10	Aldehyde Ferredoxin Oxidoreductase Protein	304	500	1e-102	T	23-07-2021	IPR013984	Aldehyde ferredoxin oxidoreductase, domain 2
Meg19_1012_Bin_504_Helarchaeota	Meg19_1012_Bin_504_scaffold_10751_69_14	b7eb073f3047c494fec14516ba695152	701	SMART	SM00790	afor_n	17	231	5.5e-90	T	23-07-2021	IPR013983	Aldehyde ferredoxin oxidoreductase, N-terminal
Meg22_1416_Bin_151_Lokiarchaeota	Meg22_1416_Bin_151_scaffold_103287_183_3	f9fd57e9399e75bb8948f9094cb826b3	223	MobiDBLite	mobidb-lite	consensus disorder prediction	176	223	-	T	23-07-2021	-	-
Meg22_1416_Bin_151_Lokiarchaeota	Meg22_1416_Bin_151_scaffold_103287_183_3	f9fd57e9399e75bb8948f9094cb826b3	223	Gene3D	G3DSA:3.40.20.10	Severin	9	116	5.7e-11	T	23-07-2021	IPR029006	ADF-H/Gelsolin-like domain superfamily
Meg22_1416_Bin_151_Lokiarchaeota	Meg22_1416_Bin_151_scaffold_103287_183_3	f9fd57e9399e75bb8948f9094cb826b3	223	SUPERFAMILY	SSF55753	Actin depolymerizing proteins	9	106	4.67e-09	T	23-07-2021	-	-
Meg19_1012_Bin_504_Helarchaeota	Meg19_1012_Bin_504_scaffold_901_10_17	296cae88b0a180b94b80bf20f39c86e2	1160	Pfam	PF00890	FAD binding domain	604	638	2.7e-06	T	23-07-2021	IPR003953	FAD-dependent oxidoreductase 2, FAD binding domain
Meg19_1012_Bin_504_Helarchaeota	Meg19_1012_Bin_504_scaffold_901_10_17	296cae88b0a180b94b80bf20f39c86e2	1160	ProSiteProfiles	PS51379	4Fe-4S ferredoxin-type iron-sulfur binding domain profile.	151	185	7.206	T	23-07-2021	IPR017896	4Fe-4S ferredoxin-type, iron-sulphur binding domain
Meg19_1012_Bin_504_Helarchaeota	Meg19_1012_Bin_504_scaffold_901_10_17	296cae88b0a180b94b80bf20f39c86e2	1160	SUPERFAMILY	SSF51905	FAD/NAD(P)-binding domain	4	436	3.75e-20	T	23-07-2021	IPR036188	FAD/NAD(P)-binding domain superfamily
Meg19_1012_Bin_504_Helarchaeota	Meg19_1012_Bin_504_scaffold_901_10_17	296cae88b0a180b94b80bf20f39c86e2	1160	ProSiteProfiles	PS51379	4Fe-4S ferredoxin-type iron-sulfur binding domain profile.	941	970	10.045	T	23-07-2021	IPR017896	4Fe-4S ferredoxin-type, iron-sulphur binding domain
Meg19_1012_Bin_504_Helarchaeota	Meg19_1012_Bin_504_scaffold_901_10_17	296cae88b0a180b94b80bf20f39c86e2	1160	Pfam	PF00037	4Fe-4S binding domain	977	999	6.1e-05	T	23-07-2021	IPR017896	4Fe-4S ferredoxin-type, iron-sulphur binding domain
Meg19_1012_Bin_504_Helarchaeota	Meg19_1012_Bin_504_scaffold_901_10_17	296cae88b0a180b94b80bf20f39c86e2	1160	Pfam	PF00037	4Fe-4S binding domain	106	124	2.4e-05	T	23-07-2021	IPR017896	4Fe-4S ferredoxin-type, iron-sulphur binding domain
Meg19_1012_Bin_504_Helarchaeota	Meg19_1012_Bin_504_scaffold_901_10_17	296cae88b0a180b94b80bf20f39c86e2	1160	Pfam	PF00037	4Fe-4S binding domain	944	965	7.8e-05	T	23-07-2021	IPR017896	4Fe-4S ferredoxin-type, iron-sulphur binding domain
Meg19_1012_Bin_504_Helarchaeota	Meg19_1012_Bin_504_scaffold_901_10_17	296cae88b0a180b94b80bf20f39c86e2	1160	Pfam	PF02662	Methyl-viologen-reducing hydrogenase, delta subunit	1028	1149	9.1e-53	T	23-07-2021	IPR003813	F420-non-reducing hydrogenase iron-sulfur subunit D
Meg19_1012_Bin_504_Helarchaeota	Meg19_1012_Bin_504_scaffold_901_10_17	296cae88b0a180b94b80bf20f39c86e2	1160	ProSitePatterns	PS00198	4Fe-4S ferredoxin-type iron-sulfur binding region signature.	112	123	-	T	23-07-2021	IPR017900	4Fe-4S ferredoxin, iron-sulphur binding, conserved site
Meg19_1012_Bin_504_Helarchaeota	Meg19_1012_Bin_504_scaffold_901_10_17	296cae88b0a180b94b80bf20f39c86e2	1160	Gene3D	G3DSA:3.50.50.60	-	297	371	1.7e-05	T	23-07-2021	IPR036188	FAD/NAD(P)-binding domain superfamily
Meg19_1012_Bin_504_Helarchaeota	Meg19_1012_Bin_504_scaffold_901_10_17	296cae88b0a180b94b80bf20f39c86e2	1160	ProSiteProfiles	PS51379	4Fe-4S ferredoxin-type iron-sulfur binding domain profile.	103	132	10.407	T	23-07-2021	IPR017896	4Fe-4S ferredoxin-type, iron-sulphur binding domain
Meg19_1012_Bin_504_Helarchaeota	Meg19_1012_Bin_504_scaffold_901_10_17	296cae88b0a180b94b80bf20f39c86e2	1160	SUPERFAMILY	SSF54862	4Fe-4S ferredoxins	935	1007	1.53e-21	T	23-07-2021	-	-
Meg19_1012_Bin_504_Helarchaeota	Meg19_1012_Bin_504_scaffold_901_10_17	296cae88b0a180b94b80bf20f39c86e2	1160	ProSiteProfiles	PS51379	4Fe-4S ferredoxin-type iron-sulfur binding domain profile.	974	1003	10.138	T	23-07-2021	IPR017896	4Fe-4S ferredoxin-type, iron-sulphur binding domain
Meg19_1012_Bin_504_Helarchaeota	Meg19_1012_Bin_504_scaffold_901_10_17	296cae88b0a180b94b80bf20f39c86e2	1160	Gene3D	G3DSA:3.30.70.3270	-	87	212	3.2e-11	T	23-07-2021	-	-
Meg19_1012_Bin_504_Helarchaeota	Meg19_1012_Bin_504_scaffold_901_10_17	296cae88b0a180b94b80bf20f39c86e2	1160	PANTHER	PTHR43498	FERREDOXIN:COB-COM HETERODISULFIDE REDUCTASE SUBUNIT A	4	429	1.2e-35	T	23-07-2021	IPR039650	H(2):CoB-CoM heterodisulfide,ferredoxin reductase subunit A-like
Meg19_1012_Bin_504_Helarchaeota	Meg19_1012_Bin_504_scaffold_901_10_17	296cae88b0a180b94b80bf20f39c86e2	1160	PANTHER	PTHR43498	FERREDOXIN:COB-COM HETERODISULFIDE REDUCTASE SUBUNIT A	599	693	1.2e-35	T	23-07-2021	IPR039650	H(2):CoB-CoM heterodisulfide,ferredoxin reductase subunit A-like
Meg19_1012_Bin_504_Helarchaeota	Meg19_1012_Bin_504_scaffold_901_10_17	296cae88b0a180b94b80bf20f39c86e2	1160	Gene3D	G3DSA:3.50.50.60	-	7	85	1.2e-09	T	23-07-2021	IPR036188	FAD/NAD(P)-binding domain superfamily
Meg19_1012_Bin_504_Helarchaeota	Meg19_1012_Bin_504_scaffold_901_10_17	296cae88b0a180b94b80bf20f39c86e2	1160	SUPERFAMILY	SSF51971	Nucleotide-binding domain	605	931	5.71e-17	T	23-07-2021	-	-
Meg19_1012_Bin_504_Helarchaeota	Meg19_1012_Bin_504_scaffold_901_10_17	296cae88b0a180b94b80bf20f39c86e2	1160	Gene3D	G3DSA:3.30.70.20	-	909	1017	9.5e-13	T	23-07-2021	-	-
Meg19_1012_Bin_504_Helarchaeota	Meg19_1012_Bin_504_scaffold_901_10_17	296cae88b0a180b94b80bf20f39c86e2	1160	Gene3D	G3DSA:3.50.50.60	-	598	774	3.5e-16	T	23-07-2021	IPR036188	FAD/NAD(P)-binding domain superfamily
Meg19_1012_Bin_504_Helarchaeota	Meg19_1012_Bin_504_scaffold_901_10_17	296cae88b0a180b94b80bf20f39c86e2	1160	Pfam	PF07992	Pyridine nucleotide-disulphide oxidoreductase	10	428	2.7e-11	T	23-07-2021	IPR023753	FAD/NAD(P)-binding domain
Meg19_1012_Bin_504_Helarchaeota	Meg19_1012_Bin_504_scaffold_901_10_17	296cae88b0a180b94b80bf20f39c86e2	1160	ProSitePatterns	PS00198	4Fe-4S ferredoxin-type iron-sulfur binding region signature.	983	994	-	T	23-07-2021	IPR017900	4Fe-4S ferredoxin, iron-sulphur binding, conserved site
Meg19_1012_Bin_504_Helarchaeota	Meg19_1012_Bin_504_scaffold_901_10_17	296cae88b0a180b94b80bf20f39c86e2	1160	Gene3D	G3DSA:3.50.50.60	-	372	437	1.7e-05	T	23-07-2021	IPR036188	FAD/NAD(P)-binding domain superfamily
Meg22_1214_Bin_191_Lokiarchaeota	Meg22_1214_Bin_191_scaffold_1199_14_66	9897ad688fadd3f9a557490ab9db29d4	38	Gene3D	G3DSA:3.30.420.130	-	4	38	2.8e-07	T	23-07-2021	IPR036105	Dinitrogenase iron-molybdenum cofactor biosynthesis superfamily
Meg22_1214_Bin_191_Lokiarchaeota	Meg22_1214_Bin_191_scaffold_1199_14_66	9897ad688fadd3f9a557490ab9db29d4	38	SUPERFAMILY	SSF53146	Nitrogenase accessory factor-like	4	37	6.41e-08	T	23-07-2021	IPR036105	Dinitrogenase iron-molybdenum cofactor biosynthesis superfamily
Meg22_1012_Bin_233_Lokiarchaeota	Meg22_1012_Bin_233_scaffold_1094_26_65	9897ad688fadd3f9a557490ab9db29d4	38	Gene3D	G3DSA:3.30.420.130	-	4	38	2.8e-07	T	23-07-2021	IPR036105	Dinitrogenase iron-molybdenum cofactor biosynthesis superfamily
Meg22_1012_Bin_233_Lokiarchaeota	Meg22_1012_Bin_233_scaffold_1094_26_65	9897ad688fadd3f9a557490ab9db29d4	38	SUPERFAMILY	SSF53146	Nitrogenase accessory factor-like	4	37	6.41e-08	T	23-07-2021	IPR036105	Dinitrogenase iron-molybdenum cofactor biosynthesis superfamily
Meg22_1416_Bin_151_Lokiarchaeota	Meg22_1416_Bin_151_scaffold_13063_95_14	9897ad688fadd3f9a557490ab9db29d4	38	Gene3D	G3DSA:3.30.420.130	-	4	38	2.8e-07	T	23-07-2021	IPR036105	Dinitrogenase iron-molybdenum cofactor biosynthesis superfamily
Meg22_1416_Bin_151_Lokiarchaeota	Meg22_1416_Bin_151_scaffold_13063_95_14	9897ad688fadd3f9a557490ab9db29d4	38	SUPERFAMILY	SSF53146	Nitrogenase accessory factor-like	4	37	6.41e-08	T	23-07-2021	IPR036105	Dinitrogenase iron-molybdenum cofactor biosynthesis superfamily
Meg19_1012_Bin_504_Helarchaeota	Meg19_1012_Bin_504_scaffold_72108_131_4	b579f53584e5fcff73ca2d4251b475aa	257	SUPERFAMILY	SSF52540	P-loop containing nucleoside triphosphate hydrolases	5	222	9.12e-29	T	23-07-2021	IPR027417	P-loop containing nucleoside triphosphate hydrolase
Meg19_1012_Bin_504_Helarchaeota	Meg19_1012_Bin_504_scaffold_72108_131_4	b579f53584e5fcff73ca2d4251b475aa	257	PANTHER	PTHR43384:SF10	ATPASE INVOLVED IN CHROMOSOME PARTITIONING, PARA/MIND FAMILY	1	216	1.7e-18	T	23-07-2021	-	-
Meg19_1012_Bin_504_Helarchaeota	Meg19_1012_Bin_504_scaffold_72108_131_4	b579f53584e5fcff73ca2d4251b475aa	257	PANTHER	PTHR43384	SEPTUM SITE-DETERMINING PROTEIN MIND HOMOLOG, CHLOROPLASTIC-RELATED	1	216	1.7e-18	T	23-07-2021	-	-
Meg19_1012_Bin_504_Helarchaeota	Meg19_1012_Bin_504_scaffold_72108_131_4	b579f53584e5fcff73ca2d4251b475aa	257	Pfam	PF13614	AAA domain	5	180	4.4e-16	T	23-07-2021	IPR025669	AAA domain
Meg19_1012_Bin_504_Helarchaeota	Meg19_1012_Bin_504_scaffold_72108_131_4	b579f53584e5fcff73ca2d4251b475aa	257	Gene3D	G3DSA:3.40.50.300	-	4	255	1.2e-33	T	23-07-2021	-	-
Meg19_1012_Bin_504_Helarchaeota	Meg19_1012_Bin_504_scaffold_106373_141_2	70c3c009ba2b60a0684d3bdcd4f7d2aa	332	Gene3D	G3DSA:2.60.120.1390	-	165	332	2.6e-33	T	23-07-2021	-	-
Meg19_1012_Bin_504_Helarchaeota	Meg19_1012_Bin_504_scaffold_106373_141_2	70c3c009ba2b60a0684d3bdcd4f7d2aa	332	Pfam	PF11175	Protein of unknown function (DUF2961)	90	329	2.3e-60	T	23-07-2021	IPR021345	Protein of unknown function DUF2961
Meg22_1012_Bin_233_Lokiarchaeota	Meg22_1012_Bin_233_scaffold_21_5_153	06a582d0df43bd28984ea7d60830c801	258	ProSiteProfiles	PS51440	Triosephosphate isomerase (TIM) family profile.	3	250	81.111	T	23-07-2021	IPR000652	Triosephosphate isomerase
Meg22_1012_Bin_233_Lokiarchaeota	Meg22_1012_Bin_233_scaffold_21_5_153	06a582d0df43bd28984ea7d60830c801	258	SUPERFAMILY	SSF51351	Triosephosphate isomerase (TIM)	1	250	3.53e-92	T	23-07-2021	IPR035990	Triosephosphate isomerase superfamily
Meg22_1012_Bin_233_Lokiarchaeota	Meg22_1012_Bin_233_scaffold_21_5_153	06a582d0df43bd28984ea7d60830c801	258	ProSitePatterns	PS00171	Triosephosphate isomerase active site.	166	176	-	T	23-07-2021	IPR020861	Triosephosphate isomerase, active site
Meg22_1012_Bin_233_Lokiarchaeota	Meg22_1012_Bin_233_scaffold_21_5_153	06a582d0df43bd28984ea7d60830c801	258	Gene3D	G3DSA:3.20.20.70	Aldolase class I	1	256	6.5e-101	T	23-07-2021	IPR013785	Aldolase-type TIM barrel
Meg22_1012_Bin_233_Lokiarchaeota	Meg22_1012_Bin_233_scaffold_21_5_153	06a582d0df43bd28984ea7d60830c801	258	PANTHER	PTHR21139	TRIOSEPHOSPHATE ISOMERASE	2	252	1.6e-84	T	23-07-2021	IPR000652	Triosephosphate isomerase
Meg22_1012_Bin_233_Lokiarchaeota	Meg22_1012_Bin_233_scaffold_21_5_153	06a582d0df43bd28984ea7d60830c801	258	Hamap	MF_00147_B	Triosephosphate isomerase [tpiA].	2	250	58.3831	T	23-07-2021	IPR022896	Triosephosphate isomerase, bacterial/eukaryotic
Meg22_1012_Bin_233_Lokiarchaeota	Meg22_1012_Bin_233_scaffold_21_5_153	06a582d0df43bd28984ea7d60830c801	258	PANTHER	PTHR21139:SF2	TRIOSEPHOSPHATE ISOMERASE	2	252	1.6e-84	T	23-07-2021	-	-
Meg22_1012_Bin_233_Lokiarchaeota	Meg22_1012_Bin_233_scaffold_21_5_153	06a582d0df43bd28984ea7d60830c801	258	TIGRFAM	TIGR00419	tim: triose-phosphate isomerase	5	242	1.9e-61	T	23-07-2021	IPR000652	Triosephosphate isomerase
Meg22_1012_Bin_233_Lokiarchaeota	Meg22_1012_Bin_233_scaffold_21_5_153	06a582d0df43bd28984ea7d60830c801	258	CDD	cd00311	TIM	5	249	4.65901e-131	T	23-07-2021	IPR000652	Triosephosphate isomerase
Meg22_1012_Bin_233_Lokiarchaeota	Meg22_1012_Bin_233_scaffold_21_5_153	06a582d0df43bd28984ea7d60830c801	258	Pfam	PF00121	Triosephosphate isomerase	5	248	7.7e-94	T	23-07-2021	IPR000652	Triosephosphate isomerase
Meg22_1214_Bin_191_Lokiarchaeota	Meg22_1214_Bin_191_scaffold_17559_83_17	06a582d0df43bd28984ea7d60830c801	258	ProSiteProfiles	PS51440	Triosephosphate isomerase (TIM) family profile.	3	250	81.111	T	23-07-2021	IPR000652	Triosephosphate isomerase
Meg22_1214_Bin_191_Lokiarchaeota	Meg22_1214_Bin_191_scaffold_17559_83_17	06a582d0df43bd28984ea7d60830c801	258	SUPERFAMILY	SSF51351	Triosephosphate isomerase (TIM)	1	250	3.53e-92	T	23-07-2021	IPR035990	Triosephosphate isomerase superfamily
Meg22_1214_Bin_191_Lokiarchaeota	Meg22_1214_Bin_191_scaffold_17559_83_17	06a582d0df43bd28984ea7d60830c801	258	ProSitePatterns	PS00171	Triosephosphate isomerase active site.	166	176	-	T	23-07-2021	IPR020861	Triosephosphate isomerase, active site
Meg22_1214_Bin_191_Lokiarchaeota	Meg22_1214_Bin_191_scaffold_17559_83_17	06a582d0df43bd28984ea7d60830c801	258	Gene3D	G3DSA:3.20.20.70	Aldolase class I	1	256	6.5e-101	T	23-07-2021	IPR013785	Aldolase-type TIM barrel
Meg22_1214_Bin_191_Lokiarchaeota	Meg22_1214_Bin_191_scaffold_17559_83_17	06a582d0df43bd28984ea7d60830c801	258	PANTHER	PTHR21139	TRIOSEPHOSPHATE ISOMERASE	2	252	1.6e-84	T	23-07-2021	IPR000652	Triosephosphate isomerase
Meg22_1214_Bin_191_Lokiarchaeota	Meg22_1214_Bin_191_scaffold_17559_83_17	06a582d0df43bd28984ea7d60830c801	258	Hamap	MF_00147_B	Triosephosphate isomerase [tpiA].	2	250	58.3831	T	23-07-2021	IPR022896	Triosephosphate isomerase, bacterial/eukaryotic
Meg22_1214_Bin_191_Lokiarchaeota	Meg22_1214_Bin_191_scaffold_17559_83_17	06a582d0df43bd28984ea7d60830c801	258	PANTHER	PTHR21139:SF2	TRIOSEPHOSPHATE ISOMERASE	2	252	1.6e-84	T	23-07-2021	-	-
Meg22_1214_Bin_191_Lokiarchaeota	Meg22_1214_Bin_191_scaffold_17559_83_17	06a582d0df43bd28984ea7d60830c801	258	TIGRFAM	TIGR00419	tim: triose-phosphate isomerase	5	242	1.9e-61	T	23-07-2021	IPR000652	Triosephosphate isomerase
Meg22_1214_Bin_191_Lokiarchaeota	Meg22_1214_Bin_191_scaffold_17559_83_17	06a582d0df43bd28984ea7d60830c801	258	CDD	cd00311	TIM	5	249	4.65901e-131	T	23-07-2021	IPR000652	Triosephosphate isomerase
Meg22_1214_Bin_191_Lokiarchaeota	Meg22_1214_Bin_191_scaffold_17559_83_17	06a582d0df43bd28984ea7d60830c801	258	Pfam	PF00121	Triosephosphate isomerase	5	248	7.7e-94	T	23-07-2021	IPR000652	Triosephosphate isomerase
Meg19_1012_Bin_504_Helarchaeota	Meg19_1012_Bin_504_scaffold_1339_18_53	f923737b1fd80937faa63b8e95244691	126	SUPERFAMILY	SSF48452	TPR-like	10	74	8.35e-05	T	23-07-2021	IPR011990	Tetratricopeptide-like helical domain superfamily
Meg19_1012_Bin_504_Helarchaeota	Meg19_1012_Bin_504_scaffold_1339_18_53	f923737b1fd80937faa63b8e95244691	126	Coils	Coil	Coil	59	79	-	T	23-07-2021	-	-
Meg19_1012_Bin_504_Helarchaeota	Meg19_1012_Bin_504_scaffold_1339_18_53	f923737b1fd80937faa63b8e95244691	126	Gene3D	G3DSA:1.25.40.10	-	1	90	6.9e-06	T	23-07-2021	IPR011990	Tetratricopeptide-like helical domain superfamily
Meg22_1214_Bin_191_Lokiarchaeota	Meg22_1214_Bin_191_scaffold_206_4_109	208ddb0a80179107a9dab08180d42246	219	Gene3D	G3DSA:3.90.550.10	Spore Coat Polysaccharide Biosynthesis Protein SpsA; Chain A	10	219	3.5e-35	T	23-07-2021	IPR029044	Nucleotide-diphospho-sugar transferases
Meg22_1214_Bin_191_Lokiarchaeota	Meg22_1214_Bin_191_scaffold_206_4_109	208ddb0a80179107a9dab08180d42246	219	SUPERFAMILY	SSF53448	Nucleotide-diphospho-sugar transferases	7	212	4.83e-22	T	23-07-2021	IPR029044	Nucleotide-diphospho-sugar transferases
Meg22_1214_Bin_191_Lokiarchaeota	Meg22_1214_Bin_191_scaffold_206_4_109	208ddb0a80179107a9dab08180d42246	219	PANTHER	PTHR19136	MOLYBDENUM COFACTOR GUANYLYLTRANSFERASE	9	215	1.3e-27	T	23-07-2021	-	-
Meg22_1214_Bin_191_Lokiarchaeota	Meg22_1214_Bin_191_scaffold_206_4_109	208ddb0a80179107a9dab08180d42246	219	Pfam	PF12804	MobA-like NTP transferase domain	10	130	6.1e-15	T	23-07-2021	IPR025877	MobA-like NTP transferase
Meg22_1214_Bin_191_Lokiarchaeota	Meg22_1214_Bin_191_scaffold_206_4_109	208ddb0a80179107a9dab08180d42246	219	PANTHER	PTHR19136:SF83	ADENOSYLCOBINAMIDE-PHOSPHATE GUANYLYLTRANSFERASE	9	215	1.3e-27	T	23-07-2021	-	-
Meg22_1012_Bin_233_Lokiarchaeota	Meg22_1012_Bin_233_scaffold_1_1_229	208ddb0a80179107a9dab08180d42246	219	Gene3D	G3DSA:3.90.550.10	Spore Coat Polysaccharide Biosynthesis Protein SpsA; Chain A	10	219	3.5e-35	T	23-07-2021	IPR029044	Nucleotide-diphospho-sugar transferases
Meg22_1012_Bin_233_Lokiarchaeota	Meg22_1012_Bin_233_scaffold_1_1_229	208ddb0a80179107a9dab08180d42246	219	SUPERFAMILY	SSF53448	Nucleotide-diphospho-sugar transferases	7	212	4.83e-22	T	23-07-2021	IPR029044	Nucleotide-diphospho-sugar transferases
Meg22_1012_Bin_233_Lokiarchaeota	Meg22_1012_Bin_233_scaffold_1_1_229	208ddb0a80179107a9dab08180d42246	219	PANTHER	PTHR19136	MOLYBDENUM COFACTOR GUANYLYLTRANSFERASE	9	215	1.3e-27	T	23-07-2021	-	-
Meg22_1012_Bin_233_Lokiarchaeota	Meg22_1012_Bin_233_scaffold_1_1_229	208ddb0a80179107a9dab08180d42246	219	Pfam	PF12804	MobA-like NTP transferase domain	10	130	6.1e-15	T	23-07-2021	IPR025877	MobA-like NTP transferase
Meg22_1012_Bin_233_Lokiarchaeota	Meg22_1012_Bin_233_scaffold_1_1_229	208ddb0a80179107a9dab08180d42246	219	PANTHER	PTHR19136:SF83	ADENOSYLCOBINAMIDE-PHOSPHATE GUANYLYLTRANSFERASE	9	215	1.3e-27	T	23-07-2021	-	-
Meg22_1416_Bin_151_Lokiarchaeota	Meg22_1416_Bin_151_scaffold_2489_50_10	208ddb0a80179107a9dab08180d42246	219	Gene3D	G3DSA:3.90.550.10	Spore Coat Polysaccharide Biosynthesis Protein SpsA; Chain A	10	219	3.5e-35	T	23-07-2021	IPR029044	Nucleotide-diphospho-sugar transferases
Meg22_1416_Bin_151_Lokiarchaeota	Meg22_1416_Bin_151_scaffold_2489_50_10	208ddb0a80179107a9dab08180d42246	219	SUPERFAMILY	SSF53448	Nucleotide-diphospho-sugar transferases	7	212	4.83e-22	T	23-07-2021	IPR029044	Nucleotide-diphospho-sugar transferases
Meg22_1416_Bin_151_Lokiarchaeota	Meg22_1416_Bin_151_scaffold_2489_50_10	208ddb0a80179107a9dab08180d42246	219	PANTHER	PTHR19136	MOLYBDENUM COFACTOR GUANYLYLTRANSFERASE	9	215	1.3e-27	T	23-07-2021	-	-
Meg22_1416_Bin_151_Lokiarchaeota	Meg22_1416_Bin_151_scaffold_2489_50_10	208ddb0a80179107a9dab08180d42246	219	Pfam	PF12804	MobA-like NTP transferase domain	10	130	6.1e-15	T	23-07-2021	IPR025877	MobA-like NTP transferase
Meg22_1416_Bin_151_Lokiarchaeota	Meg22_1416_Bin_151_scaffold_2489_50_10	208ddb0a80179107a9dab08180d42246	219	PANTHER	PTHR19136:SF83	ADENOSYLCOBINAMIDE-PHOSPHATE GUANYLYLTRANSFERASE	9	215	1.3e-27	T	23-07-2021	-	-
Meg22_1012_Bin_233_Lokiarchaeota	Meg22_1012_Bin_233_scaffold_505_19_50	e328f560290a08b7db4438f17ed4d89b	326	Gene3D	G3DSA:3.40.50.150	Vaccinia Virus protein VP39	199	319	6.1e-06	T	23-07-2021	-	-
Meg22_1012_Bin_233_Lokiarchaeota	Meg22_1012_Bin_233_scaffold_505_19_50	e328f560290a08b7db4438f17ed4d89b	326	SUPERFAMILY	SSF53335	S-adenosyl-L-methionine-dependent methyltransferases	219	316	2.44e-07	T	23-07-2021	IPR029063	S-adenosyl-L-methionine-dependent methyltransferase
Meg19_1012_Bin_504_Helarchaeota	Meg19_1012_Bin_504_scaffold_401_3_96	86ed5987860232f2db20c18c48ea41c2	400	Pfam	PF03279	Bacterial lipid A biosynthesis acyltransferase	63	338	3.8e-12	T	23-07-2021	IPR004960	Bacterial lipid A biosynthesis acyltransferase
Meg22_1214_Bin_191_Lokiarchaeota	Meg22_1214_Bin_191_scaffold_128_2_16	67d38dc3a13ee6f2730fa772223b26d2	111	SUPERFAMILY	SSF46785	Winged helix DNA-binding domain	4	94	1.27e-22	T	23-07-2021	IPR036390	Winged helix DNA-binding domain superfamily
Meg22_1214_Bin_191_Lokiarchaeota	Meg22_1214_Bin_191_scaffold_128_2_16	67d38dc3a13ee6f2730fa772223b26d2	111	SMART	SM00418	arsrmega2	10	88	3.6e-16	T	23-07-2021	IPR001845	HTH ArsR-type DNA-binding domain
Meg22_1214_Bin_191_Lokiarchaeota	Meg22_1214_Bin_191_scaffold_128_2_16	67d38dc3a13ee6f2730fa772223b26d2	111	ProSiteProfiles	PS50987	ArsR-type HTH domain profile.	1	94	18.474	T	23-07-2021	IPR001845	HTH ArsR-type DNA-binding domain
Meg22_1214_Bin_191_Lokiarchaeota	Meg22_1214_Bin_191_scaffold_128_2_16	67d38dc3a13ee6f2730fa772223b26d2	111	Coils	Coil	Coil	23	43	-	T	23-07-2021	-	-
Meg22_1214_Bin_191_Lokiarchaeota	Meg22_1214_Bin_191_scaffold_128_2_16	67d38dc3a13ee6f2730fa772223b26d2	111	CDD	cd00090	HTH_ARSR	16	91	2.99458e-15	T	23-07-2021	IPR011991	ArsR-like helix-turn-helix domain
Meg22_1214_Bin_191_Lokiarchaeota	Meg22_1214_Bin_191_scaffold_128_2_16	67d38dc3a13ee6f2730fa772223b26d2	111	Pfam	PF01022	Bacterial regulatory protein, arsR family	17	63	1.7e-14	T	23-07-2021	IPR001845	HTH ArsR-type DNA-binding domain
Meg22_1214_Bin_191_Lokiarchaeota	Meg22_1214_Bin_191_scaffold_128_2_16	67d38dc3a13ee6f2730fa772223b26d2	111	PANTHER	PTHR33154	TRANSCRIPTIONAL REGULATOR, ARSR FAMILY	7	92	6.2e-17	T	23-07-2021	-	-
Meg22_1214_Bin_191_Lokiarchaeota	Meg22_1214_Bin_191_scaffold_128_2_16	67d38dc3a13ee6f2730fa772223b26d2	111	Gene3D	G3DSA:1.10.10.10	winged helix"" repressor DNA binding domain	1	96	1.5e-22	T	23-07-2021	IPR036388	Winged helix-like DNA-binding domain superfamily
Meg22_1214_Bin_191_Lokiarchaeota	Meg22_1214_Bin_191_scaffold_128_2_16	67d38dc3a13ee6f2730fa772223b26d2	111	PRINTS	PR00778	Bacterial regulatory protein ArsR family signature	44	59	1e-08	T	23-07-2021	IPR001845	HTH ArsR-type DNA-binding domain
[truncated: 90,690 more rows]

## Sheet: B4_G1_IMG_AllGenes
Original_Contig_Name	IMG_Contig_Name	Locus_Tag	IMG_Gene_ID	Gene_Type	Gene_Start	Gene_Stop	Gene_Length	Homolog_Gene_ID	Homolog_Taxon_ID	Lineage_%ID	Lineage	Product	Source	COG_ID	Cog_%ID	PFAM_ID	KO_Term	KO_Term	KO_%ID	EC_Number
[truncated: 4,378 more rows]

[truncated: 6 more sheets: B59_G1-IMG_AllGenes, Meg19_1012_Bin_151-IMG_AllGenes, Meg19_1012_Bin_504-IMG_AllGenes, Meg22_1012_Bin_233-IMG_AllGenes, Meg22_1214_Bin_191-IMG_AllGenes, Meg22_1416_Bin_151-IMG_AllGenes]
