# Supplementary material for: Unique viruses that infect Archaea related to eukaryotes
Source: Research Square preprint supplement (doi:10.21203/rs.3.rs-960995/v1), 2021-10-12
Supplement: Supplementary file 10 [file fdaee3b385b5a61e64c8dc84.xlsx]

## Sheet: Virus Overview
Scaffold_ID	UViG Proposed Name	Naming Background	NCBI Accession	Host CRISPR link	Prodigal Genes	UViG size (bp)	Phase	Genome type
Guay1_scaffold_2kb_Guay1_scaffold00443_fragment1	Vedfolnir	Vedfolnir: Eagle at the top of the World Tree Yggdrasil		Thorarchaeota B59_G1 (CRISPR), Chloroflexi B30_G2, B4_G1	29	21966	Lysogenic	Linear
Meg22_1012_scaffold_2kb_scaffold_226	Lokiarchaeota Virus Fenrir Meg22_1012	Fenrir: Giant wolf, son of Loki and Angrboda, foretold to kill the god Odin at Ragnarok		Lokiarchaeota Meg22_1012_Bin_233; Lokiarchaeota Meg22_1416_Bin_151	127	89152	Lytic	Linear
Meg22_1214_scaffold_2kb_scaffold_313	Lokiarchaeota Virus Fenrir Meg22_1214	Fenrir: Giant wolf, son of Loki and Angrboda, foretold to kill the god Odin at Ragnarok		Lokiarchaeota Meg22_1416_Bin_151	127	89063	Lytic	Linear
Meg22_1214_scaffold_2kb_scaffold_2849	Lokiarchaeota Virus Sköll Meg22_1214	Sköll: Wolf who chases the sun, and will devour it at Ragnarok		Lokiarchaeota Meg22_1214_Bin_191	65	39909	Lytic	Linear
Meg22_1012_scaffold_2kb_scaffold_548	Helarchaeota-Omnitrophica Virus Ratatoskr Meg22_1012	Ratatoskr: The squirrel who runs up and down the World Tree delivering messages between Vedfolnir and Nidhogg		Helarchaeota Meg19_1012_Bin_504; Omnitrophica Meg19_1012_Bin_151	104	66636	Lytic	Linear
Meg22_1012_scaffold_2kb_scaffold_91	Helarchaeota Virus Nidhogg Meg22_1012	Nidhogg: A dragon/serpent inhabiting the Náströnd area of Hel who gnaws at the roots of the World Tree, and chews upon the corpses of murderers, adulterers, and oath breakers		Helarchaeota Meg19_1012_Bin_504	196	117419	Lytic	Circular
Meg22_1214_scaffold_2kb_scaffold_152	Helarchaeota Virus Nidhogg Meg22_1214	Nidhogg: A dragon/serpent inhabiting the Náströnd area of Hel who gnaws at the roots of the World Tree, and chews upon the corpses of murderers, adulterers, and oath breakers		Helarchaeota Meg19_1012_Bin_504	179	112862	Lytic	Circular

## Sheet: Asgard MAG GTDB-TK
Genome	Classification	fastani_reference	fastani_reference_radius	fastani_taxonomy	fastani_ani	fastani_af	closest_placement_reference	closest_placement_radius	closest_placement_taxonomy	closest_placement_ani	closest_placement_af	pplacer_taxonomy	classification_method	note	other_related_references(genome_id,species_name,radius,ANI,AF)	msa_percent	translation_table	red_value	warnings
Meg22_1012_Bin_233_Lokiarchaeota	d__Archaea;p__Asgardarchaeota;c__Lokiarchaeia;o__CR-4;f__SOKP01;g__;s__	N/A	N/A	N/A	N/A	N/A	N/A	N/A	N/A	N/A	N/A	d__Archaea;p__Asgardarchaeota;c__Lokiarchaeia;o__CR-4;f__SOKP01;g__;s__	taxonomic classification fully defined by topology	N/A	N/A	81.09	11	0.783697	N/A
Meg22_1416_Bin_151_Lokiarchaeota	d__Archaea;p__Asgardarchaeota;c__Lokiarchaeia;o__CR-4;f__SOKP01;g__;s__	N/A	N/A	N/A	N/A	N/A	N/A	N/A	N/A	N/A	N/A	d__Archaea;p__Asgardarchaeota;c__Lokiarchaeia;o__CR-4;f__SOKP01;g__;s__	taxonomic classification fully defined by topology	N/A	N/A	77.05	11	0.783523	N/A
Meg22_1214_Bin_191_Lokiarchaeota	d__Archaea;p__Asgardarchaeota;c__Lokiarchaeia;o__CR-4;f__SOKP01;g__;s__	N/A	N/A	N/A	N/A	N/A	N/A	N/A	N/A	N/A	N/A	d__Archaea;p__Asgardarchaeota;c__Lokiarchaeia;o__CR-4;f__SOKP01;g__;s__	taxonomic classification fully defined by topology	N/A	N/A	81.48	11	0.784452	N/A
Meg19_1012_Bin_504_Helarchaeota	d__Archaea;p__Asgardarchaeota;c__Lokiarchaeia;o__Helarchaeales;f__RDOG01;g__;s__	N/A	N/A	N/A	N/A	N/A	GCA_011365055.1	95	d__Archaea;p__Asgardarchaeota;c__Lokiarchaeia;o__Helarchaeales;f__RDOG01;g__RDOG01;s__RDOG01 sp011365055	75.25	0.03	d__Archaea;p__Asgardarchaeota;c__Lokiarchaeia;o__Helarchaeales;f__;g__;s__	taxonomic classification defined by topology and ANI	N/A	N/A	81.26	11	0.703476	N/A

## Sheet: MAG statistics
MAG	Taxonomy	CheckM Completeness	CheckM Contamination	Genome Size (Mb)	NCBI Accession
Meg22_1012_Bin_233	Archaea; Asgard; Lokiarchaeota	91.12	3.27	4.52	N/A
Meg22_1416_Bin_151	Archaea; Asgard; Lokiarchaeota	88.32	6.07	4.42	N/A
Meg22_1214_Bin_191	Archaea; Asgard; Lokiarchaeota	92.06	3.27	4.68	N/A
Meg19_1012_Bin_504	Archaea; Asgard; Helarchaeota	85.98	3.74	3.62	N/A
Meg19_1012_Bin_151	Bacteria; PVC; Omnitrophica	93.01	2.15	1.53	N/A
B59_G1	Archaea; Asgard; Thorarchaeota	95.33	8.96	4.3	SAMN09214824
B30_G2	Bacteria; Chloroflexi	81.82	3.64	6.53	SAMN09215043
B4_G1	Bacteria; Chloroflexi	83.18	3.94	4.61	SAMN09214778
